# Supplementary material for: Energy Metabolism and Lipidome Are Highly Regulated during Osteogenic Differentiation of Dental Follicle Cells
Source: Hindawi journal article supplement (doi:10.1155/2022/3674931), 2022-07-16
Supplement: f2 [file 3674931.f2.pdf]

# Supplementary Table 2

| Antigen                          | Molecular weight | DMEM 1d       | ODM 1d               | BMP2 1d              | DMEM 7d       | ODM 7d               | BMP2 7d              | DMEM 14d      | ODM 14d              | BMP2 14d             | DMEM 28d      | ODM 28d              | BMP2 28d             |
|----------------------------------|------------------|---------------|----------------------|----------------------|---------------|----------------------|----------------------|---------------|----------------------|----------------------|---------------|----------------------|----------------------|
| Hexokinase I                     | 102 kDa          | 1,000 ± 0,294 | 1,151 ± 0,249        | 0,901 ± 0,199        | 0,964 ± 0,104 | 1,402 ± 0,223        | 0,831 ± 0,185        | 0,584 ± 0,201 | <b>1,203 ± 0,123</b> | 0,543 ± 0,142        | 0,383 ± 0,115 | <b>1,698 ± 0,285</b> | <b>1,469 ± 0,422</b> |
| Hexokinase II                    | 102 kDa          | 1,000 ± 0,185 | 0,731 ± 0,106        | 0,869 ± 0,205        | 0,185 ± 0,064 | 0,251 ± 0,051        | 0,089 ± 0,039        | 0,240 ± 0,086 | 0,226 ± 0,094        | 0,213 ± 0,046        | 0,151 ± 0,054 | 0,300 ± 0,072        | 0,372 ± 0,248        |
| Phosphofructokinase              | 80 kDa           | 1,000 ± 0,143 | 1,090 ± 0,091        | 0,943 ± 0,058        | 0,460 ± 0,072 | 0,611 ± 0,067        | 0,401 ± 0,036        | 0,320 ± 0,051 | <b>0,512 ± 0,042</b> | 0,304 ± 0,051        | 0,201 ± 0,034 | <b>0,546 ± 0,084</b> | 0,342 ± 0,075        |
| GAPDH                            | 37 kDa           | 1,000 ± 0,201 | 0,929 ± 0,057        | 1,050 ± 0,086        | 1,084 ± 0,058 | 0,892 ± 0,131        | 1,215 ± 0,294        | 0,999 ± 0,251 | 0,688 ± 0,123        | 1,074 ± 0,184        | 0,993 ± 0,254 | 0,787 ± 0,110        | 1,292 ± 0,299        |
| Pyruvate Kinase M1/2             | 60 kDa           | 1,000 ± 0,268 | 1,030 ± 0,220        | 1,179 ± 0,274        | 1,436 ± 0,368 | 1,133 ± 0,174        | 1,693 ± 0,374        | 1,312 ± 0,300 | 0,882 ± 0,073        | 1,332 ± 0,202        | 1,198 ± 0,245 | 0,938 ± 0,087        | 1,168 ± 0,103        |
| Pyruvate Kinase M2               | 60 kDa           | 1,000 ± 0,128 | 1,001 ± 0,084        | 0,981 ± 0,220        | 1,070 ± 0,179 | 0,993 ± 0,152        | 1,084 ± 0,274        | 0,912 ± 0,217 | 0,809 ± 0,023        | 0,950 ± 0,318        | 0,763 ± 0,303 | 0,986 ± 0,160        | 1,527 ± 0,294        |
| Lactate Dehydrogenase A          | 37 kDa           | 1,000 ± 0,122 | 1,111 ± 0,138        | 1,119 ± 0,144        | 1,154 ± 0,089 | 1,235 ± 0,026        | 1,383 ± 0,124        | 1,119 ± 0,055 | 1,183 ± 0,084        | <b>1,413 ± 0,102</b> | 1,060 ± 0,068 | 1,146 ± 0,086        | <b>1,736 ± 0,270</b> |
| Aconitase 2                      | 85 kDa           | 1,000 ± 0,070 | 1,087 ± 0,015        | 0,943 ± 0,103        | 0,997 ± 0,057 | 1,229 ± 0,137        | 0,966 ± 0,027        | 0,755 ± 0,085 | 1,363 ± 0,305        | <b>1,173 ± 0,109</b> | 0,717 ± 0,103 | <b>1,469 ± 0,287</b> | <b>1,641 ± 0,281</b> |
| Isocitrate Dehydrogenase 1       | 46 kDa           | 1,000 ± 0,207 | 1,060 ± 0,170        | 1,137 ± 0,122        | 1,466 ± 0,214 | 1,086 ± 0,090        | 1,289 ± 0,209        | 1,309 ± 0,210 | 0,917 ± 0,122        | 1,111 ± 0,162        | 1,275 ± 0,297 | 0,799 ± 0,160        | 0,931 ± 0,020        |
| Isocitrate Dehydrogenase 2       | 43 kDa           | 1,000 ± 0,101 | <b>1,302 ± 0,049</b> | 0,934 ± 0,119        | 0,785 ± 0,172 | 1,524 ± 0,438        | 0,838 ± 0,402        | 0,624 ± 0,279 | <b>1,792 ± 0,142</b> | 0,684 ± 0,292        | 1,115 ± 0,152 | <b>2,872 ± 0,527</b> | <b>2,008 ± 0,157</b> |
| DLST                             | 50 kDa           | 1,000 ± 0,145 | 1,295 ± 0,055        | 0,710 ± 0,093        | 0,880 ± 0,087 | 1,016 ± 0,285        | <b>0,375 ± 0,164</b> | 0,324 ± 0,112 | <b>1,361 ± 0,070</b> | 0,546 ± 0,155        | 0,347 ± 0,157 | <b>3,195 ± 0,569</b> | <b>2,326 ± 0,752</b> |
| Fumarase                         | 49 kDa           | 1,000 ± 0,151 | 1,064 ± 0,130        | 0,765 ± 0,053        | 0,565 ± 0,100 | <b>1,274 ± 0,291</b> | 0,564 ± 0,190        | 0,245 ± 0,039 | <b>1,396 ± 0,421</b> | 0,497 ± 0,165        | 0,193 ± 0,047 | <b>1,972 ± 0,623</b> | <b>1,707 ± 0,687</b> |
| Citrate Synthase                 | 45 kDa           | 1,000 ± 0,104 | 1,053 ± 0,037        | 0,995 ± 0,166        | 0,840 ± 0,095 | 1,113 ± 0,120        | 0,660 ± 0,059        | 0,455 ± 0,028 | <b>0,961 ± 0,124</b> | 0,594 ± 0,093        | 0,282 ± 0,069 | <b>1,095 ± 0,254</b> | <b>0,911 ± 0,223</b> |
| Mitochondrial Pyruvate Carrier 1 | 12 kDa           | 1,000 ± 0,186 | 1,224 ± 0,157        | 1,086 ± 0,159        | 1,180 ± 0,007 | 1,144 ± 0,078        | <b>0,973 ± 0,091</b> | 0,861 ± 0,113 | 1,253 ± 0,254        | 1,126 ± 0,082        | 1,118 ± 0,090 | 1,569 ± 0,605        | 1,828 ± 0,362        |
| Mitochondrial Pyruvate Carrier 2 | 14 kDa           | 1,000 ± 0,341 | 0,877 ± 0,161        | 0,517 ± 0,098        | 1,187 ± 0,389 | 0,803 ± 0,121        | 0,704 ± 0,268        | 0,767 ± 0,236 | 0,621 ± 0,103        | 0,570 ± 0,319        | 0,934 ± 0,403 | 0,638 ± 0,181        | 1,733 ± 0,256        |
| Cytochrome c                     | 14 kDa           | 1,000 ± 0,267 | 1,290 ± 0,417        | 0,939 ± 0,143        | 0,743 ± 0,301 | 1,196 ± 0,239        | 0,680 ± 0,422        | 0,593 ± 0,384 | 1,716 ± 0,638        | 0,598 ± 0,255        | 0,588 ± 0,234 | <b>3,884 ± 1,297</b> | <b>1,732 ± 0,130</b> |
| Prohibitin 1                     | 32 kDa           | 1,000 ± 0,281 | 1,029 ± 0,174        | 0,782 ± 0,040        | 1,102 ± 0,198 | <b>0,456 ± 0,121</b> | <b>0,384 ± 0,103</b> | 0,548 ± 0,055 | <b>0,200 ± 0,095</b> | 0,506 ± 0,135        | 0,469 ± 0,079 | 0,266 ± 0,131        | <b>0,997 ± 0,164</b> |
| COX IV                           | 17 kDa           | 1,000 ± 0,032 | 0,865 ± 0,075        | <b>0,855 ± 0,050</b> | 0,712 ± 0,036 | <b>0,442 ± 0,063</b> | <b>0,544 ± 0,048</b> | 0,562 ± 0,051 | <b>0,972 ± 0,056</b> | <b>1,499 ± 0,245</b> | 0,444 ± 0,016 | <b>1,038 ± 0,027</b> | <b>1,280 ± 0,111</b> |
| Pyruvate Dehydrogenase           | 43 kDa           | 1,000 ± 0,052 | 0,982 ± 0,143        | 0,916 ± 0,011        | 0,561 ± 0,150 | <b>1,009 ± 0,126</b> | 0,375 ± 0,140        | 0,416 ± 0,215 | 0,541 ± 0,244        | 0,291 ± 0,145        | 0,559 ± 0,142 | 0,901 ± 0,125        | 0,593 ± 0,324        |
| SDHA                             | 70 kDa           | 1,000 ± 0,030 | <b>1,225 ± 0,095</b> | 0,803 ± 0,350        | 0,931 ± 0,111 | <b>1,389 ± 0,121</b> | 0,794 ± 0,133        | 0,465 ± 0,154 | <b>1,305 ± 0,181</b> | 0,812 ± 0,196        | 0,432 ± 0,117 | <b>1,487 ± 0,449</b> | <b>1,682 ± 0,240</b> |
| HSP60                            | 60 kDa           | 1,000 ± 0,318 | 1,134 ± 0,264        | 0,711 ± 0,228        | 0,616 ± 0,165 | 0,832 ± 0,235        | <b>0,204 ± 0,053</b> | 0,222 ± 0,014 | 0,347 ± 0,378        | 0,175 ± 0,057        | 0,131 ± 0,030 | 0,194 ± 0,099        | 0,067 ± 0,025        |
| VDAC                             | 32 kDa           | 1,000 ± 0,191 | 0,902 ± 0,266        | 0,699 ± 0,249        | 0,921 ± 0,214 | <b>0,193 ± 0,164</b> | 0,310 ± 0,234        | 0,391 ± 0,216 | 0,144 ± 0,119        | 0,624 ± 0,289        | 0,718 ± 0,219 | 0,248 ± 0,198        | 1,822 ± 0,709        |
| Acetyl-CoA Carboxylase           | 280 kDa          | 1,000 ± 0,164 | 1,194 ± 0,113        | 0,967 ± 0,138        | 1,117 ± 0,123 | 1,691 ± 0,844        | 1,062 ± 0,312        | 1,642 ± 0,275 | <b>0,660 ± 0,107</b> | 0,899 ± 0,664        | 0,871 ± 0,192 | <b>0,141 ± 0,113</b> | <b>0,080 ± 0,079</b> |
| P-Acetyl-CoA Carboxylase         | 280 kDa          | 1,000 ± 0,066 | 3,982 ± 0,828        | 2,743 ± 0,578        | 2,061 ± 0,175 | 6,897 ± 0,730        | 1,774 ± 0,194        | 1,222 ± 0,084 | 3,435 ± 0,512        | 0,698 ± 0,139        | 0,728 ± 0,072 | 0,328 ± 0,066        | <b>0,049 ± 0,010</b> |
| ATP-Citrate Lyase                | 125 kDa          | 1,000 ± 0,021 | 1,113 ± 0,166        | 1,035 ± 0,058        | 0,766 ± 0,288 | 1,156 ± 0,228        | 0,791 ± 0,283        | 0,839 ± 0,178 | 1,065 ± 0,097        | 1,010 ± 0,046        | 0,741 ± 0,301 | 0,887 ± 0,161        | 0,819 ± 0,211        |
| P-ATP-Citrate Lyase              | 125 kDa          | 1,000 ± 0,318 | <b>2,126 ± 0,450</b> | 0,944 ± 0,230        | 0,848 ± 0,509 | <b>2,521 ± 0,559</b> | 0,577 ± 0,284        | 1,156 ± 0,578 | 3,022 ± 1,339        | 0,704 ± 0,384        | 1,175 ± 0,545 | 1,706 ± 1,001        | 0,251 ± 0,140        |
| Acetyl-CoA-Synthetase            | 78 kDa           | 1,000 ± 0,105 | 1,169 ± 0,114        | 1,267 ± 0,199        | 1,150 ± 0,160 | <b>1,994 ± 0,210</b> | <b>1,783 ± 0,202</b> | 1,103 ± 0,189 | <b>1,869 ± 0,184</b> | 1,720 ± 0,341        | 1,216 ± 0,197 | 1,697 ± 0,166        | <b>1,907 ± 0,184</b> |
| Acyl-CoA-Synthetase              | 78 kDa           | 1,000 ± 0,223 | 1,048 ± 0,133        | 0,989 ± 0,213        | 1,002 ± 0,208 | 1,000 ± 0,196        | 0,957 ± 0,252        | 1,003 ± 0,207 | 0,958 ± 0,246        | 1,098 ± 0,054        | 1,097 ± 0,070 | 1,314 ± 0,230        | 1,427 ± 0,390        |
| Fatty Acid Synthase              | 273 kDa          | 1,000 ± 0,239 | 1,072 ± 0,164        | 1,137 ± 0,077        | 0,990 ± 0,306 | 1,244 ± 0,070        | 1,216 ± 0,035        | 0,952 ± 0,330 | 1,098 ± 0,141        | 1,128 ± 0,064        | 0,903 ± 0,387 | 1,001 ± 0,267        | 1,083 ± 0,161        |
| ELOVL6                           | 28 kDa           | 1,000 ± 0,100 | 0,964 ± 0,110        | 0,908 ± 0,184        | 1,465 ± 0,126 | <b>1,017 ± 0,039</b> | <b>0,777 ± 0,175</b> | 1,633 ± 0,189 | <b>0,833 ± 0,104</b> | <b>0,439 ± 0,138</b> | 2,592 ± 0,454 | <b>1,000 ± 0,190</b> | <b>0,561 ± 0,148</b> |
