# Supplementary material for: Energy Metabolism and Lipidome Are Highly Regulated during Osteogenic Differentiation of Dental Follicle Cells
Source: Hindawi journal article supplement (doi:10.1155/2022/3674931), 2022-07-16

# Supplementary Figure S2

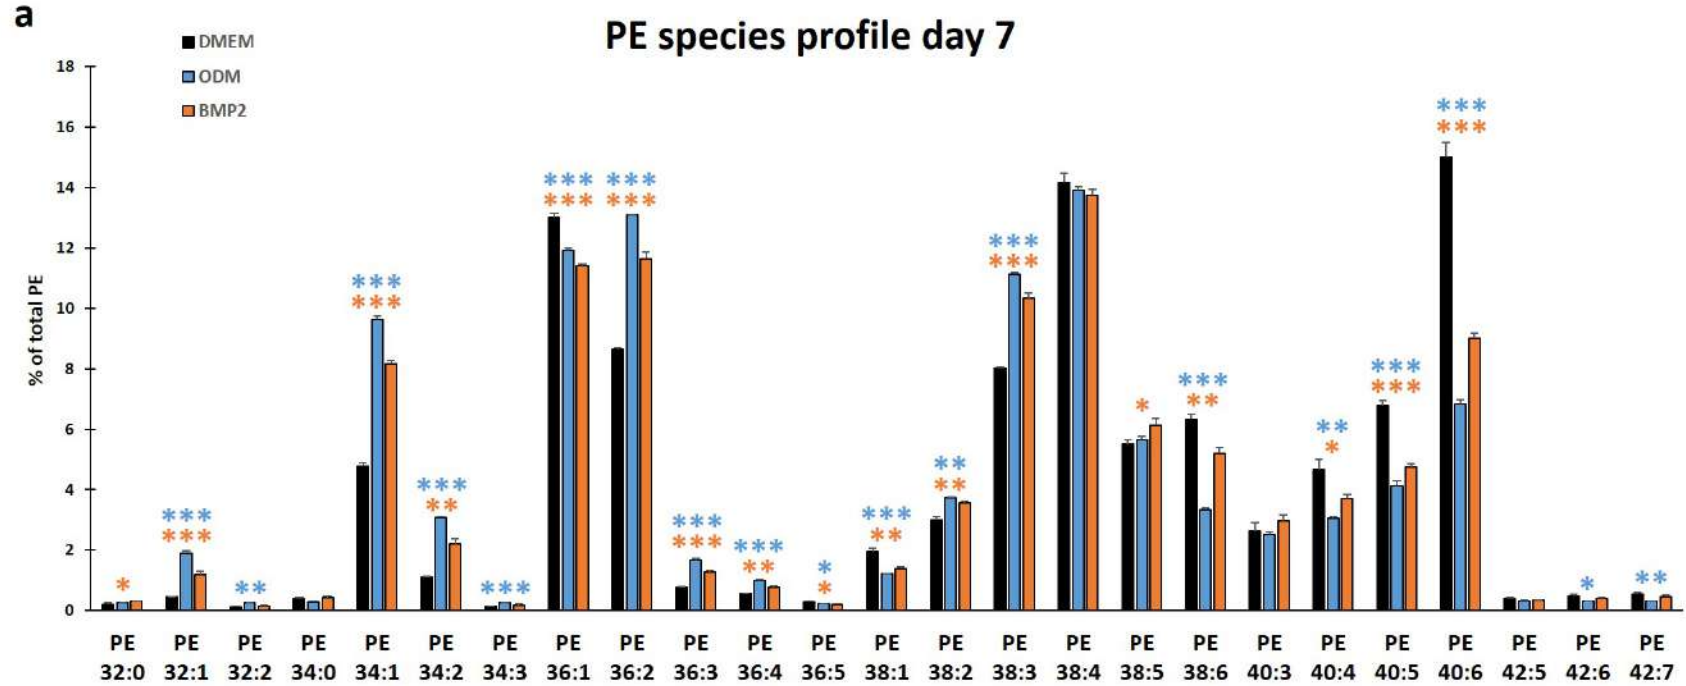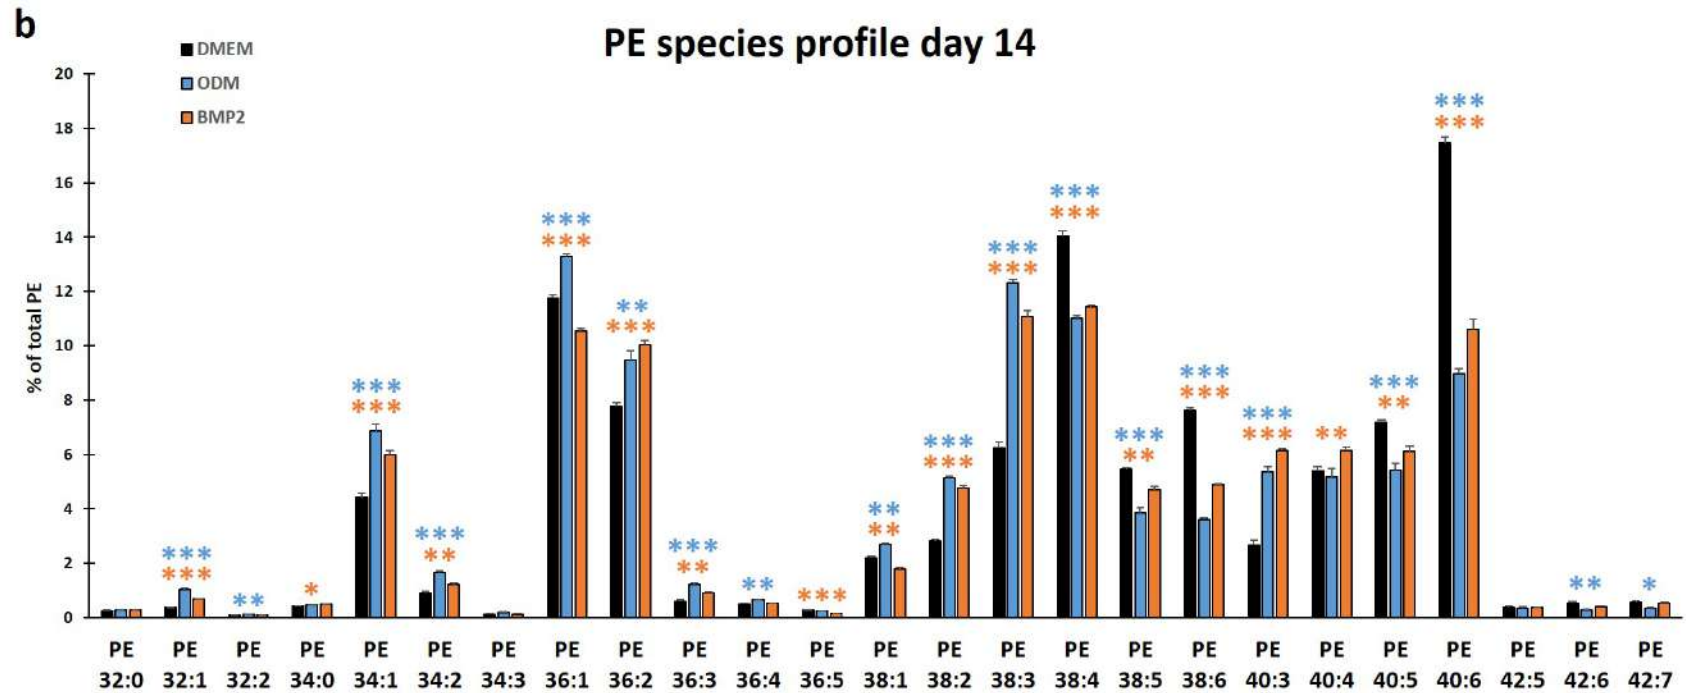

Supplement: f4 [file 3674931.f4.pdf]
