# Supplementary material for: Energy Metabolism and Lipidome Are Highly Regulated during Osteogenic Differentiation of Dental Follicle Cells
Source: Stem Cells Int. 2022 Jul 16;2022:3674931. doi: 10.1155/2022/3674931 (PMC9315453; doi:10.1155/2022/3674931)
Supplement: Supplementary 1 — List of genes significantly regulated by dexamethasone and BMP2. Genes involved in the pathway carbon metabolism are in bold type. [file 3674931.f1.zip]

Archive with 2 entries (2 files):
- 3674931.f1.pdf
- Raw data lipidomics.xlsx
