# Supplementary material for: Energy Metabolism and Lipidome Are Highly Regulated during Osteogenic Differentiation of Dental Follicle Cells
Source: Stem Cells Int. 2022 Jul 16;2022:3674931. doi: 10.1155/2022/3674931 (PMC9315453; doi:10.1155/2022/3674931)
Supplement: Supplementary 1 — List of genes significantly regulated by dexamethasone and BMP2. Genes involved in the pathway carbon metabolism are in bold type. [file 3674931.f1.zip › Raw data lipidomics.xlsx]

## Sheet: Sum Final
Species	Lipid Class	Sum Formula	Adduct	Expected Mass	Number C-atoms	Number DBs	Number OHs	Method	Internal Standard	Value Type	Unit	0077CE_IS01	0077CE_0001	0077CE_0002	0077CE_0003	0077CE_0004	0077CE_0005	0077CE_0006	0077CE_0007	0077CE_0008	0077CE_0009	0077CE_0010	0077CE_0011	0077CE_0012	0077CE_0013	0077CE_0014	0077CE_0015	0077CE_0016	0077CE_0017	0077CE_0018	0077CE_0019	0077CE_0020	0077CE_0021	0077CE_0022	0077CE_0023	0077CE_0024	0077CE_0025	0077CE_0026	0077CE_0027	0077CE_0028	0077CE_0029	0077CE_0030	0077CE_0031	0077CE_0032	0077CE_0033	0077CE_0034	0077CE_0035	0077CE_0036
Sample Name													S1	S2	S3	S4	S5	S6	S7	S8	S9	S10	S11	S12	S13	S14	S15	S16	S17	S18	S19	S20	S21	S22	S23	S24	S25	S26	S27	S28	S29	S30	S31	S32	S33	S34	S35	S36
Sample Material													whole cell lysate	whole cell lysate	whole cell lysate	whole cell lysate	whole cell lysate	whole cell lysate	whole cell lysate	whole cell lysate	whole cell lysate	whole cell lysate	whole cell lysate	whole cell lysate	whole cell lysate	whole cell lysate	whole cell lysate	whole cell lysate	whole cell lysate	whole cell lysate	whole cell lysate	whole cell lysate	whole cell lysate	whole cell lysate	whole cell lysate	whole cell lysate	whole cell lysate	whole cell lysate	whole cell lysate	whole cell lysate	whole cell lysate	whole cell lysate	whole cell lysate	whole cell lysate	whole cell lysate	whole cell lysate	whole cell lysate	whole cell lysate
Batch												1	1	1	1	1	1	1	1	1	1	1	1	1	1	1	1	1	1	1	1	1	1	1	1	1	1	1	1	1	1	1	1	1	1	1	1	1
Treatment													DMEM 1d	DMEM 1d	DMEM 1d	ODM 1d	ODM 1d	ODM 1d	BMP2 1d	BMP2 1d	BMP2 1d	DMEM 7d	DMEM 7d	DMEM 7d	ODM 7d	ODM 7d	ODM 7d	BMP2 7d	BMP2 7d	BMP2 7d	DMEM 14d	DMEM 14d	DMEM 14d	ODM 14d	ODM 14d	ODM 14d	BMP2 14d	BMP2 14d	BMP2 14d	DMEM 28d	DMEM 28d	DMEM 28d	ODM 28d	ODM 28d	ODM 28d	BMP2 28d	BMP2 28d	BMP2 28d
LPE 14:0	LPE	C19H41N1O7P1	+H+	426.262	14	0	0	QQQ+ SRM NL141	LPE 13:0	Concentration	nmol/mg protein	0	0	0	0.00939463	0.0102751	0.00130862	0.0015799	0.00229247	0.00858691	0.00177076	0.0121615	0	0.00084967	0.0164691	0.0326705	0.0136649	0.00750207	0.010758	0.00418844	0	0.0131936	0.00711084	0.0260079	0.022548	0.00659002	0	0.0103109	0.0136538	0.000924039	0.0141756	0.00821065	0.00358053	0.00812056	0.00273033	0.0100301	0.0065806	0.00241668
LPE 16:0	LPE	C21H45N1O7P1	+H+	454.293	16	0	0	QQQ+ SRM NL141	LPE 13:0	Concentration	nmol/mg protein	0	0.0421879	0.0519392	0.0360782	0.0480351	0	0.0371196	0.033555	0.0343247	0.0423239	0	0.0603608	0	0.0738925	0.0662894	0.052201	0.0672185	0.0786524	0.0695164	0.0560517	0.0352538	0.0348444	0.0547733	0	0.0341498	0.0402766	0.0578068	0.0582733	0	0.0473967	0	0.0722731	0.0686022	0.0556629	0.0397367	0.0391336	0.0289062
LPE 16:1	LPE	C21H43N1O7P1	+H+	452.277	16	1	0	QQQ+ SRM NL141	LPE 13:0	Concentration	nmol/mg protein	0	0	0	0	0	0	0	0	0	0	0	0	0	0.0492963	0	0	0	0	0	0	0	0	0.0464132	0	0	0	0	0	0	0	0	0	0	0	0	0	0
LPE 18:0	LPE	C23H49N1O7P1	+H+	482.324	18	0	0	QQQ+ SRM NL141	LPE 13:0	Concentration	nmol/mg protein	0	0.0519425	0.0422458	0.0433488	0.0376237	0.0284161	0.0259893	0.0300567	0.0342229	0.0382464	0.0231505	0.0457374	0.033136	0.0644546	0.0680525	0.0597993	0.0661435	0.0623252	0.0797086	0.0512622	0.0315994	0.0309925	0.052138	0.0536962	0.0403318	0.0458247	0.0781765	0.0581156	0.0331118	0.0560351	0.0284461	0.0742539	0.0824974	0.0555651	0.0508045	0.0344245	0.0319996
LPE 18:1	LPE	C23H47N1O7P1	+H+	480.308	18	1	0	QQQ+ SRM NL141	LPE 13:0	Concentration	nmol/mg protein	0	0.140857	0.113138	0.135814	0.115365	0.0810484	0.0656522	0.106298	0.0968064	0.128966	0.132553	0.219849	0.163428	0.355161	0.395753	0.282614	0.300334	0.299674	0.274909	0.242556	0.15501	0.157973	0.35097	0.300806	0.242321	0.192692	0.282199	0.193172	0.183241	0.285901	0.213682	0.306185	0.255726	0.318082	0.159036	0.18778	0.125896
LPE 18:2	LPE	C23H45N1O7P1	+H+	478.293	18	2	0	QQQ+ SRM NL141	LPE 13:0	Concentration	nmol/mg protein	0	0	0	0	0	0	0	0	0	0	0	0	0	0	0	0	0	0	0	0	0	0	0	0	0	0	0	0	0	0	0	0	0	0	0	0	0
LPE 20:1	LPE	C25H51N1O7P1	+H+	508.34	20	1	0	QQQ+ SRM NL141	LPE 13:0	Concentration	nmol/mg protein	0	0	0	0	0	0	0	0	0	0	0	0.0459619	0	0.0421295	0.0536037	0.0516359	0.0500156	0.0385816	0.0403922	0	0	0	0.0811431	0.0741395	0.066482	0.043301	0.0450429	0.04994	0.0398374	0	0	0.0494305	0.0414359	0.0603145	0	0.0410441	0
LPE 20:2	LPE	C25H49N1O7P1	+H+	506.324	20	2	0	QQQ+ SRM NL141	LPE 13:0	Concentration	nmol/mg protein	0	0	0	0	0	0	0	0	0	0	0	0	0	0.0342483	0	0.0506684	0	0.0351813	0	0	0	0	0.0578104	0.0508148	0.0479809	0	0	0	0	0	0	0.0339772	0	0.0365071	0	0	0
LPE 20:3	LPE	C25H47N1O7P1	+H+	504.308	20	3	0	QQQ+ SRM NL141	LPE 13:0	Concentration	nmol/mg protein	0	0	0	0	0	0	0	0	0	0	0	0	0	0.0671976	0.090066	0.0614873	0.0582264	0.0559265	0.0541418	0	0	0	0.142125	0.10686	0.114827	0.0473912	0.0716209	0.0646306	0	0	0	0.129362	0.128376	0.15332	0.0574694	0.0497272	0.0472557
LPE 20:4	LPE	C25H45N1O7P1	+H+	502.293	20	4	0	QQQ+ SRM NL141	LPE 13:0	Concentration	nmol/mg protein	0	0.143038	0.103476	0.111581	0.124871	0.108136	0.0873665	0.106874	0.0996764	0.144801	0.124779	0.200225	0.14858	0.13887	0.147088	0.121433	0.139657	0.118709	0.10473	0.196198	0.114761	0.156114	0.215554	0.157684	0.14712	0.101888	0.124961	0.116482	0.157435	0.206821	0.139511	0.150328	0.125639	0.162877	0.178139	0.170591	0.14732
LPE 20:5	LPE	C25H43N1O7P1	+H+	500.277	20	5	0	QQQ+ SRM NL141	LPE 13:0	Concentration	nmol/mg protein	0	0	0	0	0	0	0	0	0	0	0	0	0	0	0	0	0	0	0	0	0	0	0	0	0	0	0	0	0	0	0	0	0	0	0	0	0
LPE 22:4	LPE	C27H49N1O7P1	+H+	530.324	22	4	0	QQQ+ SRM NL141	LPE 13:0	Concentration	nmol/mg protein	0	0.0507942	0.0481005	0.0616863	0.0406764	0.0353507	0.0314564	0.0385071	0.0390237	0	0.0481662	0.0573409	0.0719409	0.0563444	0.0605988	0.0526031	0.0651836	0.0555546	0.0482407	0.0690121	0.0372034	0.0490573	0.117423	0.0735556	0.0772187	0.044806	0.0553264	0.0561378	0.0800015	0.0919502	0.071722	0.0560014	0.0481501	0.0467269	0.0525442	0.0573635	0.0429771
LPE 22:5	LPE	C27H47N1O7P1	+H+	528.308	22	5	0	QQQ+ SRM NL141	LPE 13:0	Concentration	nmol/mg protein	0	0.110868	0.0842355	0.0873872	0.0777706	0.0804363	0.0683121	0.0914693	0.0725451	0.090626	0.0505401	0.0877274	0.0879875	0.0883108	0.112082	0.0937524	0.0702132	0.0821652	0.067543	0.0777029	0.0665932	0.0539995	0.139722	0.130593	0.120746	0.0593707	0.0513723	0.0737085	0.0646378	0.0847999	0.0687413	0.0794873	0.0672895	0.0880896	0.0789879	0.0590524	0.0619042
LPE 22:6	LPE	C27H45N1O7P1	+H+	526.293	22	6	0	QQQ+ SRM NL141	LPE 13:0	Concentration	nmol/mg protein	0	0.207338	0.164261	0.197486	0.184118	0.159151	0.132359	0.147834	0.13065	0.178456	0.169054	0.237283	0.186792	0.147889	0.142884	0.126871	0.194126	0.16432	0.151047	0.22551	0.157316	0.140583	0.233345	0.229999	0.155601	0.143655	0.139628	0.146312	0.197451	0.258998	0.197675	0.120814	0.0977712	0.138039	0.172662	0.154482	0.142615
Sum C14	LPE		+H+					QQQ+ SRM NL141	LPE 13:0	Concentration	nmol/mg protein				0.00939463	0.0102751	0.00130862	0.0015799	0.00229247	0.00858691	0.00177076	0.0121615		0.00084967	0.0164691	0.0326705	0.0136649	0.00750207	0.010758	0.00418844		0.0131936	0.00711084	0.0260079	0.022548	0.00659002		0.0103109	0.0136538	0.000924039	0.0141756	0.00821065	0.00358053	0.00812056	0.00273033	0.0100301	0.0065806	0.00241668
Sum C16	LPE		+H+					QQQ+ SRM NL141	LPE 13:0	Concentration	nmol/mg protein		0.0421879	0.0519392	0.0360782	0.0480351		0.0371196	0.033555	0.0343247	0.0423239		0.0603608		0.123189	0.0662894	0.052201	0.0672185	0.0786524	0.0695164	0.0560517	0.0352538	0.0348444	0.101187		0.0341498	0.0402766	0.0578068	0.0582733		0.0473967		0.0722731	0.0686022	0.0556629	0.0397367	0.0391336	0.0289062
Sum C18	LPE		+H+					QQQ+ SRM NL141	LPE 13:0	Concentration	nmol/mg protein		0.1928	0.155384	0.179163	0.152989	0.109465	0.0916416	0.136354	0.131029	0.167212	0.155703	0.265586	0.196564	0.419615	0.463805	0.342413	0.366478	0.361999	0.354618	0.293818	0.186609	0.188966	0.403108	0.354502	0.282653	0.238517	0.360375	0.251288	0.216353	0.341936	0.242128	0.380439	0.338224	0.373647	0.20984	0.222205	0.157896
Sum C20	LPE		+H+					QQQ+ SRM NL141	LPE 13:0	Concentration	nmol/mg protein		0.143038	0.103476	0.111581	0.124871	0.108136	0.0873665	0.106874	0.0996764	0.144801	0.124779	0.246187	0.14858	0.282445	0.290758	0.285224	0.247899	0.248399	0.199264	0.196198	0.114761	0.156114	0.496632	0.389498	0.37641	0.192581	0.241625	0.231053	0.197272	0.206821	0.139511	0.363098	0.295451	0.413018	0.235609	0.261362	0.194576
Sum C22	LPE		+H+					QQQ+ SRM NL141	LPE 13:0	Concentration	nmol/mg protein		0.369	0.296597	0.34656	0.302565	0.274938	0.232128	0.27781	0.242219	0.269082	0.267761	0.382352	0.346721	0.292544	0.315564	0.273227	0.329523	0.30204	0.26683	0.372225	0.261112	0.24364	0.49049	0.434147	0.353565	0.247832	0.246326	0.276158	0.34209	0.435749	0.338139	0.256303	0.213211	0.272856	0.304194	0.270898	0.247496
Sum DB0	LPE		+H+					QQQ+ SRM NL141	LPE 13:0	Concentration	nmol/mg protein		0.0941305	0.094185	0.0888216	0.0959339	0.0297247	0.0646888	0.0659042	0.0771345	0.082341	0.035312	0.106098	0.0339857	0.154816	0.167012	0.125665	0.140864	0.151736	0.153413	0.107314	0.0800468	0.0729478	0.132919	0.0762442	0.0810716	0.0861013	0.146294	0.130043	0.0340358	0.117607	0.0366567	0.150108	0.15922	0.113958	0.100571	0.0801387	0.0633225
Sum DB1	LPE		+H+					QQQ+ SRM NL141	LPE 13:0	Concentration	nmol/mg protein		0.140857	0.113138	0.135814	0.115365	0.0810484	0.0656522	0.106298	0.0968064	0.128966	0.132553	0.265811	0.163428	0.446586	0.449356	0.33425	0.35035	0.338255	0.315302	0.242556	0.15501	0.157973	0.478526	0.374946	0.308803	0.235993	0.327241	0.243112	0.223079	0.285901	0.213682	0.355615	0.297162	0.378396	0.159036	0.228824	0.125896
Sum DB2	LPE		+H+					QQQ+ SRM NL141	LPE 13:0	Concentration	nmol/mg protein														0.0342483		0.0506684		0.0351813					0.0578104	0.0508148	0.0479809							0.0339772		0.0365071
Sum DB3	LPE		+H+					QQQ+ SRM NL141	LPE 13:0	Concentration	nmol/mg protein														0.0671976	0.090066	0.0614873	0.0582264	0.0559265	0.0541418				0.142125	0.10686	0.114827	0.0473912	0.0716209	0.0646306				0.129362	0.128376	0.15332	0.0574694	0.0497272	0.0472557
Sum DB4	LPE		+H+					QQQ+ SRM NL141	LPE 13:0	Concentration	nmol/mg protein		0.193832	0.151577	0.173268	0.165548	0.143486	0.118823	0.145381	0.1387	0.144801	0.172946	0.257566	0.220521	0.195214	0.207687	0.174036	0.204841	0.174264	0.152971	0.26521	0.151964	0.205171	0.332977	0.23124	0.224338	0.146694	0.180287	0.17262	0.237436	0.298772	0.211233	0.206329	0.173789	0.209604	0.230684	0.227954	0.190297
Sum DB5	LPE		+H+					QQQ+ SRM NL141	LPE 13:0	Concentration	nmol/mg protein		0.110868	0.0842355	0.0873872	0.0777706	0.0804363	0.0683121	0.0914693	0.0725451	0.090626	0.0505401	0.0877274	0.0879875	0.0883108	0.112082	0.0937524	0.0702132	0.0821652	0.067543	0.0777029	0.0665932	0.0539995	0.139722	0.130593	0.120746	0.0593707	0.0513723	0.0737085	0.0646378	0.0847999	0.0687413	0.0794873	0.0672895	0.0880896	0.0789879	0.0590524	0.0619042
Sum DB6	LPE		+H+					QQQ+ SRM NL141	LPE 13:0	Concentration	nmol/mg protein		0.207338	0.164261	0.197486	0.184118	0.159151	0.132359	0.147834	0.13065	0.178456	0.169054	0.237283	0.186792	0.147889	0.142884	0.126871	0.194126	0.16432	0.151047	0.22551	0.157316	0.140583	0.233345	0.229999	0.155601	0.143655	0.139628	0.146312	0.197451	0.258998	0.197675	0.120814	0.0977712	0.138039	0.172662	0.154482	0.142615
Sum Total	LPE		+H+					QQQ+ SRM NL141	LPE 13:0	Concentration	nmol/mg protein		0.747026	0.607397	0.682777	0.638735	0.493847	0.449835	0.556886	0.515836	0.625189	0.560405	0.954486	0.692715	1.13426	1.16909	0.96673	1.01862	1.00185	0.894418	0.918292	0.61093	0.630675	1.51742	1.2007	1.05337	0.719205	0.916444	0.830426	0.75664	1.04608	0.727988	1.07569	0.923608	1.11791	0.79941	0.800179	0.631291
LPE 14:0	LPE	C19H41N1O7P1	+H+	426.262	14	0	0	QQQ+ SRM NL141	LPE 13:0	% of total LPE	%		0	0	1.37595	1.60867	0.264986	0.351216	0.411659	1.66466	0.283236	2.17013	0	0.122658	1.45197	2.79453	1.41352	0.736494	1.07381	0.468287	0	2.15959	1.1275	1.71395	1.87791	0.625614	0	1.1251	1.64419	0.122124	1.35512	1.12786	0.332858	0.879222	0.244234	1.25469	0.822391	0.382816
LPE 16:0	LPE	C21H45N1O7P1	+H+	454.293	16	0	0	QQQ+ SRM NL141	LPE 13:0	% of total LPE	%		5.64746	8.55112	5.28404	7.52035	0	8.25182	6.02547	6.65419	6.76977	0	6.32391	0	6.51459	5.67018	5.39975	6.59898	7.85074	7.77225	6.10391	5.77052	5.52494	3.60963	0	3.24196	5.60015	6.30773	7.01728	0	4.53089	0	6.71875	7.42763	4.97917	4.97076	4.8906	4.57891
LPE 16:1	LPE	C21H43N1O7P1	+H+	452.277	16	1	0	QQQ+ SRM NL141	LPE 13:0	% of total LPE	%		0	0	0	0	0	0	0	0	0	0	0	0	4.34611	0	0	0	0	0	0	0	0	3.05869	0	0	0	0	0	0	0	0	0	0	0	0	0	0
LPE 18:0	LPE	C23H49N1O7P1	+H+	482.324	18	0	0	QQQ+ SRM NL141	LPE 13:0	% of total LPE	%		6.95325	6.95522	6.34889	5.89034	5.75403	5.77752	5.39728	6.63446	6.11757	4.13103	4.79184	4.7835	5.68251	5.82099	6.18573	6.49345	6.22103	8.91178	5.58234	5.17234	4.91418	3.43595	4.47209	3.82884	6.37157	8.53042	6.99829	4.37616	5.35668	3.90749	6.90289	8.93208	4.97043	6.35525	4.30211	5.06891
LPE 18:1	LPE	C23H47N1O7P1	+H+	480.308	18	1	0	QQQ+ SRM NL141	LPE 13:0	% of total LPE	%		18.8558	18.6267	19.8915	18.0615	16.4116	14.5947	19.0879	18.7669	20.6283	23.653	23.0332	23.5924	31.312	33.8514	29.234	29.4844	29.9121	30.7361	26.4138	25.3728	25.0483	23.1293	25.0527	23.0044	26.7923	30.7928	23.2618	24.2178	27.3308	29.3524	28.464	27.6877	28.4532	19.8941	23.4673	19.9426
LPE 18:2	LPE	C23H45N1O7P1	+H+	478.293	18	2	0	QQQ+ SRM NL141	LPE 13:0	% of total LPE	%		0	0	0	0	0	0	0	0	0	0	0	0	0	0	0	0	0	0	0	0	0	0	0	0	0	0	0	0	0	0	0	0	0	0	0	0
LPE 20:1	LPE	C25H51N1O7P1	+H+	508.34	20	1	0	QQQ+ SRM NL141	LPE 13:0	% of total LPE	%		0	0	0	0	0	0	0	0	0	0	4.81535	0	3.71426	4.58509	5.3413	4.91013	3.85104	4.51604	0	0	0	5.34742	6.17472	6.31137	6.02067	4.91497	6.01378	5.26504	0	0	4.59522	4.48631	5.39527	0	5.12937	0
LPE 20:2	LPE	C25H49N1O7P1	+H+	506.324	20	2	0	QQQ+ SRM NL141	LPE 13:0	% of total LPE	%		0	0	0	0	0	0	0	0	0	0	0	0	3.01943	0	5.24122	0	3.51165	0	0	0	0	3.80977	4.23211	4.55499	0	0	0	0	0	0	3.15863	0	3.26565	0	0	0
LPE 20:3	LPE	C25H47N1O7P1	+H+	504.308	20	3	0	QQQ+ SRM NL141	LPE 13:0	% of total LPE	%		0	0	0	0	0	0	0	0	0	0	0	0	5.92434	7.70396	6.36034	5.7162	5.58234	6.0533	0	0	0	9.36617	8.89982	10.901	6.58938	7.81509	7.78282	0	0	0	12.026	13.8994	13.7148	7.18897	6.21451	7.48557
LPE 20:4	LPE	C25H45N1O7P1	+H+	502.293	20	4	0	QQQ+ SRM NL141	LPE 13:0	% of total LPE	%		19.1476	17.036	16.3423	19.5498	21.8966	19.4219	19.1914	19.3233	23.1611	22.266	20.9772	21.449	12.2432	12.5814	12.5612	13.7104	11.849	11.7093	21.3655	18.7846	24.7535	14.2053	13.1327	13.9666	14.1668	13.6354	14.0268	20.8071	19.7711	19.1639	13.975	13.6031	14.5697	22.2839	21.3191	23.3364
LPE 20:5	LPE	C25H43N1O7P1	+H+	500.277	20	5	0	QQQ+ SRM NL141	LPE 13:0	% of total LPE	%		0	0	0	0	0	0	0	0	0	0	0	0	0	0	0	0	0	0	0	0	0	0	0	0	0	0	0	0	0	0	0	0	0	0	0	0
LPE 22:4	LPE	C27H49N1O7P1	+H+	530.324	22	4	0	QQQ+ SRM NL141	LPE 13:0	% of total LPE	%		6.79953	7.91913	9.03463	6.36828	7.15824	6.99286	6.91472	7.56514	0	8.5949	6.00752	10.3854	4.96749	5.18343	5.44134	6.39921	5.54521	5.39354	7.51527	6.08964	7.77855	7.73832	6.12608	7.33065	6.22993	6.03708	6.76012	10.5733	8.78999	9.85209	5.20608	5.21326	4.17983	6.57287	7.16883	6.80782
LPE 22:5	LPE	C27H47N1O7P1	+H+	528.308	22	5	0	QQQ+ SRM NL141	LPE 13:0	% of total LPE	%		14.8413	13.8683	12.7988	12.1757	16.2877	15.186	16.4251	14.0636	14.4958	9.0185	9.19107	12.7018	7.78575	9.58712	9.69789	6.89297	8.20137	7.55162	8.46168	10.9003	8.56218	9.20785	10.8764	11.4629	8.25504	5.60562	8.87599	8.54274	8.10646	9.44265	7.3894	7.28551	7.87982	9.88078	7.3799	9.80597
LPE 22:6	LPE	C27H45N1O7P1	+H+	526.293	22	6	0	QQQ+ SRM NL141	LPE 13:0	% of total LPE	%		27.7551	27.0435	28.924	28.8253	32.2268	29.424	26.5465	25.3278	28.5443	30.1665	24.8598	26.9653	13.0383	12.2218	13.1238	19.0577	16.4017	16.8877	24.5576	25.7502	22.2909	15.3777	19.1555	14.7717	19.9741	15.2358	17.6189	26.0958	24.759	27.1536	11.2313	10.5858	12.3479	21.5987	19.306	22.591
Sum C14	LPE		+H+					QQQ+ SRM NL141	LPE 13:0	% of total LPE	%		0	0	1.37595	1.60867	0.264986	0.351216	0.411659	1.66466	0.283236	2.17013	0	0.122658	1.45197	2.79453	1.41352	0.736494	1.07381	0.468287	0	2.15959	1.1275	1.71395	1.87791	0.625614	0	1.1251	1.64419	0.122124	1.35512	1.12786	0.332858	0.879222	0.244234	1.25469	0.822391	0.382816
Sum C16	LPE		+H+					QQQ+ SRM NL141	LPE 13:0	% of total LPE	%		5.64746	8.55112	5.28404	7.52035	0	8.25182	6.02547	6.65419	6.76977	0	6.32391	0	10.8607	5.67018	5.39975	6.59898	7.85074	7.77225	6.10391	5.77052	5.52494	6.66831	0	3.24196	5.60015	6.30773	7.01728	0	4.53089	0	6.71875	7.42763	4.97917	4.97076	4.8906	4.57891
Sum C18	LPE		+H+					QQQ+ SRM NL141	LPE 13:0	% of total LPE	%		25.809	25.582	26.2403	23.9518	22.1657	20.3722	24.4851	25.4014	26.7459	27.7841	27.8251	28.3759	36.9945	39.6724	35.4197	35.9779	36.1331	39.6479	31.9961	30.5451	29.9625	26.5653	29.5247	26.8333	33.1639	39.3232	30.2601	28.5939	32.6874	33.2599	35.3668	36.6198	33.4236	26.2494	27.7694	25.0115
Sum C20	LPE		+H+					QQQ+ SRM NL141	LPE 13:0	% of total LPE	%		19.1476	17.036	16.3423	19.5498	21.8966	19.4219	19.1914	19.3233	23.1611	22.266	25.7926	21.449	24.9012	24.8705	29.504	24.3368	24.7941	22.2787	21.3655	18.7846	24.7535	32.7286	32.4394	35.7339	26.7768	26.3655	27.8234	26.0722	19.7711	19.1639	33.7548	31.9888	36.9454	29.4728	32.6629	30.8219
Sum C22	LPE		+H+					QQQ+ SRM NL141	LPE 13:0	% of total LPE	%		49.3959	48.8309	50.7574	47.3693	55.6728	51.6028	49.8863	46.9565	43.04	47.7799	40.0584	50.0525	25.7916	26.9924	28.263	32.3499	30.1483	29.8329	40.5345	42.7401	38.6316	32.3239	36.158	33.5652	34.4591	26.8785	33.255	45.2118	41.6554	46.4484	23.8268	23.0846	24.4076	38.0523	33.8547	39.2048
Sum DB0	LPE		+H+					QQQ+ SRM NL141	LPE 13:0	% of total LPE	%		12.6007	15.5063	13.0089	15.0194	6.01901	14.3806	11.8344	14.9533	13.1706	6.30116	11.1157	4.90616	13.6491	14.2857	12.999	13.8289	15.1456	17.1523	11.6862	13.1025	11.5666	8.75953	6.35001	7.69641	11.9717	15.9633	15.6598	4.49829	11.2427	5.03535	13.9545	17.2389	10.1938	12.5807	10.0151	10.0306
Sum DB1	LPE		+H+					QQQ+ SRM NL141	LPE 13:0	% of total LPE	%		18.8558	18.6267	19.8915	18.0615	16.4116	14.5947	19.0879	18.7669	20.6283	23.653	27.8486	23.5924	39.3724	38.4365	34.5753	34.3945	33.7632	35.2522	26.4138	25.3728	25.0483	31.5354	31.2274	29.3158	32.813	35.7077	29.2756	29.4828	27.3308	29.3524	33.0592	32.174	33.8484	19.8941	28.5967	19.9426
Sum DB2	LPE		+H+					QQQ+ SRM NL141	LPE 13:0	% of total LPE	%		0	0	0	0	0	0	0	0	0	0	0	0	3.01943	0	5.24122	0	3.51165	0	0	0	0	3.80977	4.23211	4.55499	0	0	0	0	0	0	3.15863	0	3.26565	0	0	0
Sum DB3	LPE		+H+					QQQ+ SRM NL141	LPE 13:0	% of total LPE	%		0	0	0	0	0	0	0	0	0	0	0	0	5.92434	7.70396	6.36034	5.7162	5.58234	6.0533	0	0	0	9.36617	8.89982	10.901	6.58938	7.81509	7.78282	0	0	0	12.026	13.8994	13.7148	7.18897	6.21451	7.48557
Sum DB4	LPE		+H+					QQQ+ SRM NL141	LPE 13:0	% of total LPE	%		25.9472	24.9551	25.3769	25.9181	29.0548	26.4147	26.1061	26.8884	23.1611	30.8608	26.9848	31.8344	17.2107	17.7649	18.0025	20.1096	17.3942	17.1029	28.8807	24.8743	32.532	21.9436	19.2588	21.2973	20.3967	19.6725	20.787	31.3804	28.5611	29.0159	19.181	18.8163	18.7495	28.8567	28.4879	30.1442
Sum DB5	LPE		+H+					QQQ+ SRM NL141	LPE 13:0	% of total LPE	%		14.8413	13.8683	12.7988	12.1757	16.2877	15.186	16.4251	14.0636	14.4958	9.0185	9.19107	12.7018	7.78575	9.58712	9.69789	6.89297	8.20137	7.55162	8.46168	10.9003	8.56218	9.20785	10.8764	11.4629	8.25504	5.60562	8.87599	8.54274	8.10646	9.44265	7.3894	7.28551	7.87982	9.88078	7.3799	9.80597
Sum DB6	LPE		+H+					QQQ+ SRM NL141	LPE 13:0	% of total LPE	%		27.7551	27.0435	28.924	28.8253	32.2268	29.424	26.5465	25.3278	28.5443	30.1665	24.8598	26.9653	13.0383	12.2218	13.1238	19.0577	16.4017	16.8877	24.5576	25.7502	22.2909	15.3777	19.1555	14.7717	19.9741	15.2358	17.6189	26.0958	24.759	27.1536	11.2313	10.5858	12.3479	21.5987	19.306	22.591
Sum Total	LPE		+H+					QQQ+ SRM NL141	LPE 13:0	% of total LPE	%		100	100	100	100	100	100	100	100	100	100	100	100	100	100	100	100	100	100	100	100	100	100	100	100	100	100	100	100	100	100	100	100	100	100	100	100
PE 32:0	PE	C37H75N1O8P1	+H+	692.522	32	0	0	QQQ+ SRM NL141	PE 40:0	Concentration	nmol/mg protein	0	0.0454879	0.0284806	0.0470881	0.0379173	0.0338611	0.0299228	0.0388304	0.0304879	0.0359645	0.020434	0.0378166	0.0172266	0.0671611	0.0845294	0.0559516	0.0584569	0.0657845	0.0645946	0.0596914	0.0331497	0.0221139	0.045912	0.0389598	0.0299123	0.0522617	0.0978615	0.0646999	0.0452156	0.0676304	0.0355024	0.0767025	0.0515654	0.0476637	0.0454468	0.0324193	0.0335642
PE 32:1	PE	C37H73N1O8P1	+H+	690.507	32	1	0	QQQ+ SRM NL141	PE 40:0	Concentration	nmol/mg protein	0	0.144926	0.131724	0.132431	0.14708	0.137439	0.12248	0.141532	0.115608	0.179833	0.0356618	0.0743098	0.0479458	0.517168	0.57936	0.404085	0.187182	0.265355	0.24615	0.0730489	0.0509322	0.0425061	0.167877	0.135269	0.134657	0.138105	0.232088	0.154206	0.0621708	0.0933082	0.0633771	0.352221	0.302203	0.20364	0.0963836	0.0830818	0.0666887
PE 32:2	PE	C37H71N1O8P1	+H+	688.491	32	2	0	QQQ+ SRM NL141	PE 40:0	Concentration	nmol/mg protein	0	0.0267938	0.0267272	0.0263314	0.0305171	0.0254915	0.0164838	0.0265267	0.0292318	0.0318235	0.00917376	0.0156865	0.0162883	0.064162	0.0827152	0.0499796	0.0309183	0.0316448	0.0279775	0.0150491	0.012011	0.00870857	0.0178732	0.0180909	0.0135968	0.0166513	0.0275581	0.0236143	0.0166591	0.017264	0.0149979	0.0581495	0.049121	0.0370531	0.0320092	0.0179145	0.0153567
PE 34:0	PE	C39H79N1O8P1	+H+	720.554	34	0	0	QQQ+ SRM NL141	PE 40:0	Concentration	nmol/mg protein	5.12958e-05	0.0460337	0.0517248	0.0603062	0.0403421	0.0494706	0.0316497	0.022122	0.0352874	0.0406079	0.0385561	0.0595017	0.0368842	0.0709224	0.10018	0.0610537	0.084039	0.0987804	0.0755107	0.0894092	0.0598339	0.0453547	0.0748953	0.0667356	0.0557009	0.0928899	0.162638	0.113371	0.0570435	0.106929	0.0560911	0.130544	0.101191	0.0831486	0.0800481	0.0640343	0.0530967
PE 34:1	PE	C39H77N1O8P1	+H+	718.538	34	1	0	QQQ+ SRM NL141	PE 40:0	Concentration	nmol/mg protein	0	1.33428	1.08439	1.15772	1.16022	1.07294	0.914583	0.973325	0.866975	1.35198	0.410013	0.782409	0.479596	2.52606	2.94853	2.08042	1.48908	1.74656	1.56934	0.908772	0.597456	0.50088	1.05609	0.964671	0.859299	1.14849	2.03859	1.35464	0.724658	1.0231	0.661309	1.87534	1.64101	1.2949	0.881352	0.660829	0.601569
PE 34:2	PE	C39H75N1O8P1	+H+	716.522	34	2	0	QQQ+ SRM NL141	PE 40:0	Concentration	nmol/mg protein	0	0.368897	0.309888	0.33956	0.374893	0.318806	0.286568	0.341495	0.292022	0.441368	0.0922	0.189235	0.110165	0.778104	0.964532	0.673174	0.366146	0.451163	0.478053	0.181101	0.117579	0.113724	0.258449	0.226457	0.211413	0.227908	0.415992	0.28132	0.146255	0.212812	0.140771	0.671847	0.575069	0.384745	0.23779	0.186046	0.136162
PE 34:3	PE	C39H73N1O8P1	+H+	714.507	34	3	0	QQQ+ SRM NL141	PE 40:0	Concentration	nmol/mg protein	0	0.034719	0.0346752	0.037814	0.0337264	0.0382661	0.0252793	0.0292773	0.0285949	0.0526572	0.0107803	0.0221991	0.016516	0.067508	0.0808697	0.0542885	0.0319675	0.0293819	0.0453791	0.0300363	0.0195261	0.0135796	0.0224963	0.0197081	0.0284489	0.0281899	0.0411659	0.0319819	0.0155686	0.0384543	0.0222891	0.0816212	0.0671532	0.0551079	0.0582625	0.037876	0.038971
PE 36:1	PE	C41H81N1O8P1	+H+	746.569	36	1	0	QQQ+ SRM NL141	PE 40:0	Concentration	nmol/mg protein	0	2.36769	1.8969	2.07694	1.92209	1.84864	1.5639	1.63813	1.46312	2.18791	1.09646	2.11017	1.36119	3.06565	3.64714	2.62941	2.09052	2.4051	2.21136	2.34621	1.63644	1.33534	2.14807	1.83167	1.61616	2.07661	3.55902	2.33522	1.65278	2.3045	1.53096	3.33451	2.83345	2.30236	1.70863	1.29252	1.18067
PE 36:2	PE	C41H79N1O8P1	+H+	744.554	36	2	0	QQQ+ SRM NL141	PE 40:0	Concentration	nmol/mg protein	0	2.16971	1.75033	1.95821	1.81615	1.72445	1.41115	1.57897	1.36784	2.11467	0.724208	1.4142	0.897353	3.37486	4.05078	2.8674	2.13327	2.39366	2.31237	1.50038	1.12051	0.880423	1.48464	1.28375	1.20078	1.94552	3.41357	2.22916	1.06426	1.54808	0.960252	3.14057	2.73927	2.12129	1.39709	1.07222	0.877935
PE 36:3	PE	C41H77N1O8P1	+H+	742.538	36	3	0	QQQ+ SRM NL141	PE 40:0	Concentration	nmol/mg protein	0	0.250964	0.199462	0.238321	0.213064	0.189409	0.180392	0.179087	0.159309	0.246668	0.0657127	0.123221	0.0807938	0.424155	0.541379	0.357181	0.223101	0.257559	0.267116	0.131309	0.0811731	0.0624769	0.199151	0.156678	0.15419	0.172553	0.302343	0.209473	0.0719461	0.121487	0.0719133	0.461859	0.381988	0.310131	0.159655	0.119102	0.105053
PE 36:4	PE	C41H75N1O8P1	+H+	740.522	36	4	0	QQQ+ SRM NL141	PE 40:0	Concentration	nmol/mg protein	0	0.17643	0.149713	0.157442	0.163454	0.16541	0.132061	0.136982	0.123525	0.181161	0.0488492	0.0911443	0.0584367	0.255827	0.31893	0.215164	0.143693	0.151547	0.16031	0.107279	0.0691993	0.0555007	0.106462	0.0878538	0.0810773	0.0980718	0.177326	0.118899	0.0829682	0.109233	0.0826435	0.224856	0.191925	0.182325	0.128272	0.0891542	0.0820402
PE 36:5	PE	C41H73N1O8P1	+H+	738.507	36	5	0	QQQ+ SRM NL141	PE 40:0	Concentration	nmol/mg protein	0.000461523	0.0596666	0.0562239	0.0573015	0.0584319	0.0462382	0.0428161	0.0416752	0.0401839	0.0607977	0.0225171	0.0452876	0.0338343	0.058289	0.0683765	0.0484534	0.0433099	0.0440144	0.0370133	0.0565242	0.0386286	0.0285512	0.0427633	0.0333752	0.0298026	0.0291524	0.051437	0.0280958	0.0343299	0.0553178	0.0336264	0.0557688	0.0489547	0.0394881	0.0483449	0.0326293	0.0312274
PE 38:1	PE	C43H85N1O8P1	+H+	774.601	38	1	0	QQQ+ SRM NL141	PE 40:0	Concentration	nmol/mg protein	0	0.229127	0.17609	0.220162	0.19811	0.181644	0.181948	0.13818	0.160417	0.208451	0.148773	0.337028	0.212533	0.314325	0.366433	0.266747	0.258905	0.305204	0.254644	0.436968	0.295494	0.256467	0.43125	0.365253	0.332141	0.365022	0.607639	0.374315	0.342639	0.417749	0.282592	0.426204	0.358007	0.292371	0.248852	0.215581	0.185116
PE 38:2	PE	C43H83N1O8P1	+H+	772.585	38	2	0	QQQ+ SRM NL141	PE 40:0	Concentration	nmol/mg protein	0	0.381421	0.328496	0.330505	0.277967	0.29266	0.212727	0.286761	0.219323	0.358129	0.263504	0.476789	0.303593	0.945107	1.16054	0.821861	0.660789	0.748695	0.689499	0.574028	0.387816	0.319226	0.835885	0.722313	0.608775	0.961781	1.61197	1.02586	0.403065	0.604336	0.398886	1.33026	1.15932	0.847841	0.514716	0.429218	0.345956
PE 38:3	PE	C43H81N1O8P1	+H+	770.569	38	3	0	QQQ+ SRM NL141	PE 40:0	Concentration	nmol/mg protein	0	1.38428	1.12837	1.30013	1.1448	1.09388	0.87629	1.06229	0.964076	1.47574	0.665135	1.32422	0.837327	2.84426	3.46445	2.43544	1.90794	2.13335	2.03532	1.16884	0.905546	0.726994	1.99405	1.72333	1.46315	2.14716	3.68429	2.51153	0.812471	1.20462	0.773976	4.87961	4.09983	3.11179	1.7463	1.31977	1.11562
PE 38:4	PE	C43H79N1O8P1	+H+	768.554	38	4	0	QQQ+ SRM NL141	PE 40:0	Concentration	nmol/mg protein	0	4.1471	3.36212	3.66839	3.5431	3.34556	2.8977	2.79381	2.48204	3.80426	1.20203	2.26191	1.49651	3.62356	4.25897	3.0432	2.53412	2.83738	2.71009	2.71867	2.01245	1.60217	1.77239	1.54273	1.31169	2.28945	3.83592	2.51731	2.09309	2.81884	2.0115	3.81695	3.38174	2.89569	3.03277	2.19536	2.02129
PE 38:5	PE	C43H77N1O8P1	+H+	766.538	38	5	0	QQQ+ SRM NL141	PE 40:0	Concentration	nmol/mg protein	0	1.8125	1.48335	1.66698	1.59197	1.49712	1.2881	1.3124	1.15326	1.77001	0.4652	0.925381	0.557326	1.42979	1.7306	1.27425	1.08216	1.26789	1.25565	1.08273	0.751981	0.626395	0.582952	0.559147	0.477019	0.910203	1.56139	1.07433	0.789605	1.10349	0.76427	1.38811	1.2281	1.07235	1.15585	0.864495	0.718449
PE 38:6	PE	C43H75N1O8P1	+H+	764.522	38	6	0	QQQ+ SRM NL141	PE 40:0	Concentration	nmol/mg protein	0	1.17611	0.986721	1.09159	0.950609	0.926739	0.758005	0.754472	0.631369	1.0392	0.507889	1.06425	0.669062	0.861193	1.02046	0.742117	0.964266	1.13564	0.951033	1.52898	1.06854	0.858898	0.59816	0.491634	0.426993	0.981008	1.61457	1.08295	1.09383	1.47481	1.04988	0.832617	0.740644	0.633952	0.900039	0.599491	0.536792
PE 40:3	PE	C45H85N1O8P1	+H+	798.601	40	3	0	QQQ+ SRM NL141	PE 40:0	Concentration	nmol/mg protein	0	0.14815	0.136162	0.169255	0.145216	0.124415	0.100154	0.133615	0.121821	0.240666	0.242052	0.45489	0.233626	0.676627	0.761577	0.544083	0.577961	0.642001	0.524578	0.53422	0.404466	0.279177	0.852669	0.776781	0.627109	1.23581	2.04458	1.35494	0.516347	0.706374	0.490701	2.03568	1.77256	1.27091	1.07291	0.811802	0.629249
PE 40:4	PE	C45H83N1O8P1	+H+	796.585	40	4	0	QQQ+ SRM NL141	PE 40:0	Concentration	nmol/mg protein	0	0.627946	0.469902	0.491098	0.496184	0.441176	0.378677	0.376085	0.38303	0.522383	0.379759	0.716228	0.532745	0.810123	0.928775	0.666604	0.688117	0.803573	0.682405	1.06936	0.78201	0.591375	0.863373	0.753349	0.57134	1.22082	2.1068	1.33145	0.976085	1.33398	0.900578	1.28355	1.19391	0.801829	0.866156	0.670729	0.572693
PE 40:5	PE	C45H81N1O8P1	+H+	794.569	40	5	0	QQQ+ SRM NL141	PE 40:0	Concentration	nmol/mg protein	0.00305349	1.11003	0.941066	1.16947	1.00526	1.08167	0.859734	0.791334	0.646946	1.09004	0.544301	1.1215	0.725158	1.01163	1.2937	0.941143	0.838712	1.01491	0.941545	1.39723	1.0312	0.817337	0.92922	0.725787	0.633104	1.24502	1.97068	1.37564	1.2282	1.6458	1.13656	1.29063	1.05303	0.925084	0.919401	0.684692	0.565901
PE 40:6	PE	C45H79N1O8P1	+H+	792.554	40	6	0	QQQ+ SRM NL141	PE 40:0	Concentration	nmol/mg protein	0	2.44628	2.03657	2.22081	2.04444	1.97125	1.63823	1.42976	1.29566	2.05199	1.20027	2.56627	1.56987	1.72827	2.18081	1.46861	1.6588	1.92633	1.7065	3.40599	2.44784	2.02265	1.48182	1.21927	1.08138	2.20016	3.53814	2.24153	2.46215	3.38504	2.37736	1.75167	1.53026	1.27985	1.82671	1.34559	1.12132
PE 42:5	PE	C47H85N1O8P1	+H+	822.601	42	5	0	QQQ+ SRM NL141	PE 40:0	Concentration	nmol/mg protein	0	0.0576699	0.0569531	0.0448037	0.0563433	0.074432	0.0646173	0.0457482	0.0497553	0.0870648	0.0309227	0.0742937	0.0366744	0.0769521	0.108406	0.0604152	0.0652739	0.0745447	0.0682724	0.0657019	0.0633267	0.0425518	0.0684313	0.0364101	0.0375336	0.0783896	0.110255	0.0793295	0.070008	0.0883298	0.0739402	0.103497	0.0658561	0.0587689	0.0485921	0.0327417	0.0438396
PE 42:6	PE	C47H83N1O8P1	+H+	820.585	42	6	0	QQQ+ SRM NL141	PE 40:0	Concentration	nmol/mg protein	0.00064539	0.104548	0.0860316	0.0979258	0.0934293	0.082919	0.0680111	0.0711687	0.0589269	0.0854665	0.0458737	0.0682038	0.0531998	0.0833669	0.0885816	0.0714571	0.0765291	0.0849839	0.0808927	0.10039	0.0665001	0.06832	0.0375811	0.0424746	0.0386358	0.0898335	0.124743	0.0868485	0.0527279	0.0977815	0.0581968	0.07257	0.0653364	0.0426847	0.0860237	0.0564518	0.0404144
PE 42:7	PE	C47H81N1O8P1	+H+	818.569	42	7	0	QQQ+ SRM NL141	PE 40:0	Concentration	nmol/mg protein	0	0.0787071	0.0734948	0.0811874	0.0693831	0.0572586	0.0534159	0.0614995	0.0396232	0.0716188	0.0477813	0.0934552	0.0464544	0.0774989	0.0912537	0.0711663	0.0782676	0.110125	0.0742778	0.106121	0.0661003	0.0750293	0.0494077	0.0540701	0.0419074	0.0982439	0.178824	0.122304	0.079489	0.100978	0.0668007	0.0701182	0.0832487	0.069318	0.0698103	0.0504363	0.0497716
Sum C32	PE		+H+					QQQ+ SRM NL141	PE 40:0	Concentration	nmol/mg protein		0.217207	0.186932	0.20585	0.215514	0.196792	0.168887	0.20689	0.175328	0.247621	0.0652695	0.127813	0.0814607	0.648491	0.746605	0.510017	0.276557	0.362784	0.338722	0.147789	0.0960929	0.0733286	0.231662	0.192319	0.178166	0.207018	0.357507	0.24252	0.124045	0.178203	0.113877	0.487073	0.402889	0.288356	0.17384	0.133416	0.11561
Sum C34	PE		+H+					QQQ+ SRM NL141	PE 40:0	Concentration	nmol/mg protein	5.12958e-05	1.78393	1.48068	1.5954	1.60918	1.47949	1.25808	1.36622	1.22288	1.88662	0.55155	1.05335	0.643162	3.4426	4.09411	2.86894	1.97123	2.32588	2.16828	1.20932	0.794395	0.673538	1.41193	1.27757	1.15486	1.49748	2.65839	1.78131	0.943525	1.3813	0.88046	2.75935	2.38443	1.8179	1.25745	0.948785	0.829799
Sum C36	PE		+H+					QQQ+ SRM NL141	PE 40:0	Concentration	nmol/mg protein	0.000461523	5.02446	4.05264	4.48821	4.17319	3.97414	3.33032	3.57484	3.15397	4.79121	1.95775	3.78402	2.43161	7.17878	8.6266	6.11761	4.6339	5.25188	4.98817	4.1417	2.94595	2.3623	3.98109	3.39332	3.08202	4.3219	7.5037	4.92085	2.90629	4.13861	2.67939	7.21757	6.19559	4.95559	3.44199	2.60563	2.27692
Sum C38	PE		+H+					QQQ+ SRM NL141	PE 40:0	Concentration	nmol/mg protein		9.13054	7.46515	8.27776	7.70656	7.3376	6.21477	6.34792	5.61048	8.65578	3.25253	6.38957	4.07635	10.0182	12.0014	8.58361	7.40818	8.42815	7.89623	7.51021	5.42183	4.39015	6.21469	5.4044	4.61977	7.65463	12.9158	8.5863	5.5347	7.62383	5.2811	12.6738	10.9676	8.85399	7.59853	5.62392	4.92322
Sum C40	PE		+H+					QQQ+ SRM NL141	PE 40:0	Concentration	nmol/mg protein	0.00305349	4.33241	3.5837	4.05063	3.6911	3.61851	2.9768	2.7308	2.44746	3.90507	2.36639	4.85889	3.0614	4.22666	5.16486	3.62044	3.76359	4.38682	3.85503	6.40681	4.66552	3.71054	4.12708	3.47518	2.91294	5.9018	9.6602	6.30356	5.18278	7.07119	4.9052	6.36153	5.54977	4.27768	4.68518	3.51281	2.88916
Sum C42	PE		+H+					QQQ+ SRM NL141	PE 40:0	Concentration	nmol/mg protein	0.00064539	0.240925	0.21648	0.223917	0.219156	0.21461	0.186044	0.178416	0.148305	0.24415	0.124578	0.235953	0.136329	0.237818	0.288242	0.203039	0.220071	0.269653	0.223443	0.272213	0.195927	0.185901	0.15542	0.132955	0.118077	0.266467	0.413822	0.288482	0.202225	0.287089	0.198938	0.246185	0.214441	0.170771	0.204426	0.13963	0.134026
Sum DB0	PE		+H+					QQQ+ SRM NL141	PE 40:0	Concentration	nmol/mg protein	5.12958e-05	0.0915215	0.0802054	0.107394	0.0782594	0.0833316	0.0615725	0.0609524	0.0657753	0.0765724	0.0589901	0.0973183	0.0541108	0.138084	0.184709	0.117005	0.142496	0.164565	0.140105	0.149101	0.0929835	0.0674686	0.120807	0.105695	0.0856133	0.145152	0.2605	0.178071	0.102259	0.174559	0.0915934	0.207247	0.152756	0.130812	0.125495	0.0964536	0.0866609
Sum DB1	PE		+H+					QQQ+ SRM NL141	PE 40:0	Concentration	nmol/mg protein		4.07602	3.28911	3.58726	3.4275	3.24067	2.78291	2.89117	2.60612	3.92818	1.69091	3.30391	2.10127	6.42321	7.54146	5.38066	4.02569	4.72221	4.28149	3.765	2.58032	2.1352	3.80329	3.29686	2.94226	3.72822	6.43734	4.21838	2.78225	3.83866	2.53824	5.98828	5.13467	4.09326	2.93522	2.25202	2.03404
Sum DB2	PE		+H+					QQQ+ SRM NL141	PE 40:0	Concentration	nmol/mg protein		2.94682	2.41544	2.6546	2.49952	2.3614	1.92693	2.23375	1.90841	2.94599	1.08909	2.09591	1.3274	5.16223	6.25856	4.41241	3.19112	3.62516	3.5079	2.27056	1.63792	1.32208	2.59685	2.25061	2.03457	3.15186	5.4691	3.55996	1.63024	2.38249	1.51491	5.20083	4.52278	3.39092	2.1816	1.7054	1.37541
Sum DB3	PE		+H+					QQQ+ SRM NL141	PE 40:0	Concentration	nmol/mg protein		1.81811	1.49866	1.74552	1.53681	1.44597	1.18211	1.40427	1.2738	2.01573	0.98368	1.92453	1.16826	4.01255	4.84828	3.39099	2.74097	3.06229	2.87239	1.8644	1.41071	1.08223	3.06837	2.6765	2.2729	3.58371	6.07237	4.10793	1.41633	2.07093	1.35888	7.45877	6.32154	4.74795	3.03713	2.28855	1.88889
Sum DB4	PE		+H+					QQQ+ SRM NL141	PE 40:0	Concentration	nmol/mg protein		4.95148	3.98174	4.31693	4.20274	3.95215	3.40844	3.30688	2.98859	4.5078	1.63063	3.06929	2.08769	4.68951	5.50668	3.92497	3.36593	3.7925	3.55281	3.89531	2.86366	2.24905	2.74223	2.38393	1.96411	3.60834	6.12005	3.96766	3.15214	4.26205	2.99472	5.32536	4.76757	3.87984	4.0272	2.95524	2.67602
Sum DB5	PE		+H+					QQQ+ SRM NL141	PE 40:0	Concentration	nmol/mg protein	0.00351502	3.03987	2.53759	2.93855	2.712	2.69946	2.25527	2.19116	1.89014	3.00791	1.06294	2.16646	1.35299	2.57666	3.20108	2.32426	2.02945	2.40135	2.30248	2.60219	1.88514	1.51484	1.62337	1.35472	1.17746	2.26276	3.69377	2.55739	2.12214	2.89294	2.00839	2.838	2.39594	2.09569	2.17219	1.61456	1.35942
Sum DB6	PE		+H+					QQQ+ SRM NL141	PE 40:0	Concentration	nmol/mg protein	0.00064539	3.72694	3.10933	3.41032	3.08848	2.98091	2.46425	2.2554	1.98596	3.17666	1.75404	3.69872	2.29213	2.67283	3.28985	2.28219	2.69959	3.14696	2.73843	5.03536	3.58288	2.94987	2.11756	1.75338	1.54701	3.271	5.27745	3.41133	3.60871	4.95762	3.48544	2.65686	2.33625	1.95649	2.81278	2.00153	1.69852
Sum DB7	PE		+H+					QQQ+ SRM NL141	PE 40:0	Concentration	nmol/mg protein		0.0787071	0.0734948	0.0811874	0.0693831	0.0572586	0.0534159	0.0614995	0.0396232	0.0716188	0.0477813	0.0934552	0.0464544	0.0774989	0.0912537	0.0711663	0.0782676	0.110125	0.0742778	0.106121	0.0661003	0.0750293	0.0494077	0.0540701	0.0419074	0.0982439	0.178824	0.122304	0.079489	0.100978	0.0668007	0.0701182	0.0832487	0.069318	0.0698103	0.0504363	0.0497716
Sum Total	PE		+H+					QQQ+ SRM NL141	PE 40:0	Concentration	nmol/mg protein	0.0042117	20.7295	16.9856	18.8418	17.6147	16.8211	14.1349	14.4051	12.7584	19.7305	8.31806	16.4496	10.4303	25.7526	30.9219	21.9037	18.2735	21.0252	19.4699	19.688	14.1197	11.3958	16.1219	13.8758	12.0658	19.8493	33.5094	22.123	14.8936	20.6802	14.059	29.7455	25.7148	20.3643	17.3614	12.9642	11.1687
PE 32:0	PE	C37H75N1O8P1	+H+	692.522	32	0	0	QQQ+ SRM NL141	PE 40:0	% of total PE	%	0	0.219436	0.167675	0.249914	0.215259	0.201301	0.211694	0.269561	0.238963	0.182279	0.245658	0.229894	0.165159	0.260794	0.273364	0.255444	0.319899	0.312885	0.331767	0.303186	0.234776	0.194054	0.28478	0.280776	0.247909	0.263292	0.292042	0.292455	0.303592	0.327029	0.252525	0.257863	0.200528	0.234055	0.261769	0.250068	0.300519
PE 32:1	PE	C37H73N1O8P1	+H+	690.507	32	1	0	QQQ+ SRM NL141	PE 40:0	% of total PE	%	0	0.699128	0.775507	0.702857	0.834985	0.817061	0.866508	0.982518	0.90613	0.911451	0.428727	0.451742	0.459678	2.00822	1.87363	1.84483	1.02433	1.26208	1.26426	0.371032	0.360717	0.373	1.0413	0.974855	1.11602	0.695767	0.692605	0.697039	0.417434	0.451195	0.450795	1.18412	1.17521	0.999984	0.55516	0.640857	0.597101
PE 32:2	PE	C37H71N1O8P1	+H+	688.491	32	2	0	QQQ+ SRM NL141	PE 40:0	% of total PE	%	0	0.129255	0.157352	0.13975	0.173248	0.151545	0.116618	0.184148	0.229118	0.161291	0.110287	0.0953608	0.156164	0.249148	0.267497	0.228179	0.169197	0.150509	0.143696	0.0764375	0.0850655	0.0764194	0.110863	0.130378	0.112689	0.0838885	0.0822398	0.106741	0.111854	0.0834808	0.106678	0.19549	0.191023	0.181951	0.184369	0.138185	0.137497
PE 34:0	PE	C39H79N1O8P1	+H+	720.554	34	0	0	QQQ+ SRM NL141	PE 40:0	% of total PE	%	1.21794	0.222069	0.304522	0.320067	0.229025	0.294097	0.223912	0.153571	0.276581	0.205813	0.463523	0.361721	0.353625	0.275399	0.323977	0.278737	0.459895	0.46982	0.387834	0.454129	0.423761	0.397997	0.464557	0.480951	0.461642	0.467976	0.485351	0.512458	0.383008	0.517058	0.39897	0.43887	0.393513	0.408306	0.461069	0.493932	0.475405
PE 34:1	PE	C39H77N1O8P1	+H+	718.538	34	1	0	QQQ+ SRM NL141	PE 40:0	% of total PE	%	0	6.43662	6.38419	6.14445	6.58666	6.37854	6.47039	6.75682	6.79531	6.85227	4.9292	4.7564	4.59811	9.80897	9.53543	9.49805	8.14884	8.30697	8.06035	4.61586	4.23136	4.39532	6.55066	6.9522	7.12176	5.78604	6.08363	6.12322	4.86558	4.94725	4.70382	6.30462	6.3816	6.35867	5.0765	5.09735	5.38619
PE 34:2	PE	C39H75N1O8P1	+H+	716.522	34	2	0	QQQ+ SRM NL141	PE 40:0	% of total PE	%	0	1.77958	1.82442	1.80216	2.1283	1.89527	2.02738	2.37066	2.28885	2.23699	1.10843	1.15039	1.0562	3.02146	3.11925	3.07334	2.0037	2.14582	2.45535	0.919852	0.832731	0.997948	1.6031	1.63204	1.75216	1.14819	1.24142	1.27162	0.982002	1.02906	1.00129	2.25865	2.23634	1.88931	1.36965	1.43507	1.21914
PE 34:3	PE	C39H73N1O8P1	+H+	714.507	34	3	0	QQQ+ SRM NL141	PE 40:0	% of total PE	%	0	0.167486	0.204145	0.200693	0.191467	0.227488	0.178843	0.203243	0.224126	0.266883	0.129601	0.134952	0.158347	0.26214	0.261529	0.247851	0.174939	0.139746	0.233074	0.152561	0.13829	0.119164	0.139539	0.142033	0.235781	0.14202	0.122849	0.144564	0.104532	0.185947	0.15854	0.274399	0.261147	0.270611	0.335586	0.292159	0.348929
PE 36:1	PE	C41H81N1O8P1	+H+	746.569	36	1	0	QQQ+ SRM NL141	PE 40:0	% of total PE	%	0	11.4218	11.1677	11.0231	10.9119	10.99	11.0641	11.3719	11.4679	11.089	13.1817	12.8281	13.0504	11.9042	11.7947	12.0044	11.4402	11.4392	11.3578	11.9169	11.5897	11.7179	13.324	13.2005	13.3945	10.4619	10.621	10.5556	11.0973	11.1435	10.8896	11.2102	11.0188	11.3059	9.84155	9.96995	10.5712
PE 36:2	PE	C41H79N1O8P1	+H+	744.554	36	2	0	QQQ+ SRM NL141	PE 40:0	% of total PE	%	0	10.4668	10.3048	10.3929	10.3104	10.2517	9.98346	10.9612	10.721	10.7178	8.70645	8.59719	8.60333	13.1049	13.1	13.091	11.6741	11.3847	11.8767	7.62078	7.93581	7.72589	9.20885	9.25172	9.95193	9.80144	10.1869	10.0762	7.14579	7.48578	6.83017	10.5582	10.6525	10.4167	8.04708	8.27063	7.86064
PE 36:3	PE	C41H77N1O8P1	+H+	742.538	36	3	0	QQQ+ SRM NL141	PE 40:0	% of total PE	%	0	1.21067	1.1743	1.26485	1.20958	1.12602	1.27622	1.24322	1.24866	1.25019	0.790001	0.749079	0.774606	1.64704	1.7508	1.63069	1.2209	1.225	1.37194	0.666947	0.574892	0.548247	1.23528	1.12915	1.27791	0.869316	0.902264	0.946855	0.483068	0.587455	0.511512	1.5527	1.48548	1.52292	0.919598	0.918701	0.940596
PE 36:4	PE	C41H75N1O8P1	+H+	740.522	36	4	0	QQQ+ SRM NL141	PE 40:0	% of total PE	%	0	0.851108	0.881414	0.835604	0.92794	0.983346	0.934288	0.95093	0.968181	0.918177	0.587267	0.554082	0.560259	0.993403	1.03141	0.982321	0.786348	0.72079	0.823376	0.544892	0.49009	0.48703	0.660354	0.633146	0.671958	0.494082	0.529183	0.537447	0.557074	0.528202	0.587835	0.755934	0.746361	0.895319	0.738835	0.687696	0.734552
PE 36:5	PE	C41H73N1O8P1	+H+	738.507	36	5	0	QQQ+ SRM NL141	PE 40:0	% of total PE	%	10.9581	0.287835	0.33101	0.304119	0.331722	0.274881	0.30291	0.289309	0.314959	0.308141	0.270701	0.275311	0.324385	0.226342	0.221127	0.221212	0.237009	0.209342	0.190106	0.287099	0.273579	0.250543	0.26525	0.240529	0.247	0.146868	0.1535	0.126998	0.230501	0.267491	0.239181	0.187487	0.190376	0.193908	0.278462	0.251688	0.279596
PE 38:1	PE	C43H85N1O8P1	+H+	774.601	38	1	0	QQQ+ SRM NL141	PE 40:0	% of total PE	%	0	1.10532	1.0367	1.16848	1.12468	1.07985	1.28722	0.959242	1.25734	1.05649	1.78856	2.04885	2.03765	1.22056	1.18503	1.21782	1.41683	1.45161	1.30789	2.21946	2.09278	2.25055	2.67494	2.63231	2.75274	1.83896	1.81334	1.69197	2.30059	2.02004	2.01005	1.43284	1.39223	1.43571	1.43336	1.6629	1.65744
PE 38:2	PE	C43H83N1O8P1	+H+	772.585	38	2	0	QQQ+ SRM NL141	PE 40:0	% of total PE	%	0	1.83999	1.93397	1.75411	1.57804	1.73983	1.50498	1.99069	1.71905	1.81511	3.16786	2.89848	2.91068	3.66995	3.75313	3.75216	3.6161	3.56095	3.54136	2.91562	2.74663	2.80127	5.18479	5.20557	5.04545	4.84542	4.81051	4.63709	2.7063	2.92229	2.83723	4.47214	4.50838	4.16338	2.96471	3.31079	3.09754
PE 38:3	PE	C43H81N1O8P1	+H+	770.569	38	3	0	QQQ+ SRM NL141	PE 40:0	% of total PE	%	0	6.67782	6.64308	6.90028	6.49914	6.50299	6.19948	7.3744	7.55639	7.47949	7.99628	8.05014	8.02783	11.0446	11.2039	11.1189	10.441	10.1466	10.4537	5.93678	6.41334	6.37951	12.3686	12.4197	12.1264	10.8173	10.9948	11.3526	5.45518	5.82497	5.50521	16.4045	15.9435	15.2806	10.0585	10.1801	9.98877
PE 38:4	PE	C43H79N1O8P1	+H+	768.554	38	4	0	QQQ+ SRM NL141	PE 40:0	% of total PE	%	0	20.0058	19.794	19.4694	20.1144	19.889	20.5003	19.3946	19.4541	19.2811	14.4508	13.7506	14.3477	14.0707	13.7733	13.8936	13.8677	13.4951	13.9194	13.8087	14.2528	14.0593	10.9937	11.1182	10.8711	11.5342	11.4473	11.3787	14.0537	13.6306	14.3076	12.832	13.151	14.2194	17.4684	16.934	18.0977
PE 38:5	PE	C43H77N1O8P1	+H+	766.538	38	5	0	QQQ+ SRM NL141	PE 40:0	% of total PE	%	0	8.74359	8.73301	8.84725	9.03772	8.90025	9.1129	9.1107	9.03919	8.97094	5.59266	5.62555	5.34333	5.55202	5.59668	5.81751	5.922	6.03032	6.44918	5.49943	5.32576	5.49674	3.61591	4.02967	3.95347	4.58557	4.65957	4.85615	5.30165	5.33596	5.43618	4.66663	4.77585	5.26582	6.65761	6.66833	6.43268
PE 38:6	PE	C43H75N1O8P1	+H+	764.522	38	6	0	QQQ+ SRM NL141	PE 40:0	% of total PE	%	0	5.67362	5.80917	5.79345	5.39668	5.50937	5.36265	5.23754	4.94865	5.26699	6.10587	6.46974	6.41459	3.3441	3.30012	3.3881	5.27685	5.40136	4.88464	7.76603	7.56775	7.537	3.71024	3.54312	3.53886	4.94228	4.81826	4.89514	7.34431	7.13148	7.46772	2.79914	2.88023	3.11306	5.18413	4.62421	4.8062
PE 40:3	PE	C45H85N1O8P1	+H+	798.601	40	3	0	QQQ+ SRM NL141	PE 40:0	% of total PE	%	0	0.714684	0.801631	0.898297	0.824404	0.739634	0.708556	0.927557	0.954824	1.21977	2.90996	2.76536	2.23988	2.62741	2.46291	2.48398	3.16283	3.05349	2.69431	2.71343	2.86455	2.44983	5.28889	5.59811	5.1974	6.22594	6.1015	6.12457	3.46692	3.4157	3.49031	6.84367	6.89316	6.2409	6.17983	6.26188	5.63402
PE 40:4	PE	C45H83N1O8P1	+H+	796.585	40	4	0	QQQ+ SRM NL141	PE 40:0	% of total PE	%	0	3.02924	2.76648	2.60643	2.81688	2.62275	2.67902	2.61078	3.00217	2.6476	4.56548	4.35408	5.10767	3.14579	3.00362	3.04335	3.76565	3.82196	3.50492	5.43154	5.53843	5.18943	5.35529	5.42925	4.73519	6.15045	6.28719	6.0184	6.55374	6.45049	6.40572	4.31513	4.64289	3.93743	4.98897	5.1737	5.12764
PE 40:5	PE	C45H81N1O8P1	+H+	794.569	40	5	0	QQQ+ SRM NL141	PE 40:0	% of total PE	%	72.5002	5.35485	5.54038	6.20679	5.70695	6.43041	6.08235	5.49344	5.07074	5.52465	6.54361	6.8178	6.95241	3.92828	4.18377	4.29674	4.58977	4.82711	4.83591	7.09686	7.30327	7.17229	5.76372	5.23061	5.24708	6.27236	5.88099	6.21813	8.24649	7.95834	8.0842	4.3389	4.09506	4.54268	5.29566	5.28141	5.06683
PE 40:6	PE	C45H79N1O8P1	+H+	792.554	40	6	0	QQQ+ SRM NL141	PE 40:0	% of total PE	%	0	11.801	11.99	11.7866	11.6064	11.7189	11.59	9.9254	10.1553	10.4001	14.4297	15.6008	15.051	6.71107	7.05264	6.70487	9.07761	9.16203	8.76484	17.2998	17.3363	17.7492	9.19134	8.78703	8.96237	11.0843	10.5587	10.1321	16.5317	16.3685	16.9099	5.88887	5.95092	6.28478	10.5217	10.3793	10.0398
PE 42:5	PE	C47H85N1O8P1	+H+	822.601	42	5	0	QQQ+ SRM NL141	PE 40:0	% of total PE	%	0	0.278203	0.335303	0.237789	0.319865	0.442491	0.457147	0.317584	0.38998	0.441271	0.371754	0.451644	0.351614	0.298813	0.350581	0.275823	0.357205	0.35455	0.350657	0.333715	0.448498	0.3734	0.424462	0.262401	0.311073	0.394924	0.329028	0.358583	0.470056	0.427122	0.525929	0.347942	0.256102	0.288588	0.279886	0.252555	0.39252
PE 42:6	PE	C47H83N1O8P1	+H+	820.585	42	6	0	QQQ+ SRM NL141	PE 40:0	% of total PE	%	15.3237	0.504344	0.506498	0.519727	0.530405	0.492945	0.481158	0.494053	0.461866	0.43317	0.551496	0.414623	0.510051	0.323722	0.286469	0.326234	0.418798	0.404201	0.415476	0.509903	0.470974	0.599521	0.233106	0.306106	0.320209	0.452578	0.372263	0.392571	0.354031	0.472826	0.413948	0.24397	0.254081	0.209606	0.495488	0.435444	0.361853
PE 42:7	PE	C47H81N1O8P1	+H+	818.569	42	7	0	QQQ+ SRM NL141	PE 40:0	% of total PE	%	0	0.379687	0.43269	0.43089	0.393893	0.340397	0.377901	0.42693	0.310565	0.362986	0.574428	0.568131	0.44538	0.300936	0.295111	0.324906	0.428312	0.523776	0.381501	0.539015	0.468142	0.658396	0.306464	0.389673	0.347323	0.494949	0.533652	0.552835	0.533714	0.488281	0.475147	0.235727	0.323739	0.34039	0.4021	0.389043	0.445633
Sum C32	PE		+H+					QQQ+ SRM NL141	PE 40:0	% of total PE	%	0	1.04782	1.10053	1.09252	1.22349	1.16991	1.19482	1.43623	1.37421	1.25502	0.784672	0.776997	0.781001	2.51816	2.41449	2.32846	1.51343	1.72548	1.73972	0.750655	0.680558	0.643473	1.43694	1.38601	1.47662	1.04295	1.06689	1.09623	0.83288	0.861705	0.809998	1.63747	1.56676	1.41599	1.0013	1.02911	1.03512
Sum C34	PE		+H+					QQQ+ SRM NL141	PE 40:0	% of total PE	%	1.21794	8.60575	8.71728	8.46737	9.13545	8.7954	8.90052	9.48429	9.58487	9.56196	6.63075	6.40347	6.16628	13.368	13.2402	13.098	10.7874	11.0624	11.1366	6.1424	5.62614	5.91043	8.75786	9.20722	9.57134	7.54423	7.93325	8.05186	6.33512	6.67932	6.26262	9.27655	9.27259	8.9269	7.2428	7.31851	7.42966
Sum C36	PE		+H+					QQQ+ SRM NL141	PE 40:0	% of total PE	%	10.9581	24.2382	23.8593	23.8206	23.6915	23.6259	23.561	24.8165	24.7207	24.2833	23.5361	23.0037	23.3129	27.876	27.898	27.9296	25.3585	24.979	25.6199	21.0367	20.8641	20.7296	24.6937	24.4551	25.5433	21.7736	22.3928	22.2431	19.5137	20.0124	19.0583	24.2644	24.0935	24.3347	19.8255	20.0987	20.3866
Sum C38	PE		+H+					QQQ+ SRM NL141	PE 40:0	% of total PE	%	0	44.0462	43.9499	43.933	43.7507	43.6213	43.9675	44.0672	43.9747	43.8702	39.102	38.8433	39.0818	38.9019	38.8122	39.188	40.5405	40.086	40.5561	38.146	38.399	38.5244	38.5482	38.9485	38.2881	38.5637	38.5438	38.8116	37.1617	36.8653	37.5639	42.6073	42.6512	43.478	43.7668	43.3804	44.0804
Sum C40	PE		+H+					QQQ+ SRM NL141	PE 40:0	% of total PE	%	72.5002	20.8998	21.0985	21.4981	20.9547	21.5117	21.0599	18.9572	19.1831	19.7921	28.4488	29.538	29.351	16.4126	16.7029	16.5289	20.5959	20.8646	19.8	32.5416	33.0426	32.5607	25.5993	25.045	24.142	29.7331	28.8283	28.4932	34.7988	34.193	34.8902	21.3866	21.582	21.0058	26.9861	27.0963	25.8683
Sum C42	PE		+H+					QQQ+ SRM NL141	PE 40:0	% of total PE	%	15.3237	1.16223	1.27449	1.18841	1.24416	1.27583	1.31621	1.23857	1.16241	1.23743	1.49768	1.4344	1.30704	0.923472	0.932161	0.926962	1.20431	1.28253	1.14763	1.38263	1.38761	1.63132	0.964032	0.95818	0.978605	1.34245	1.23494	1.30399	1.3578	1.38823	1.41502	0.827639	0.833923	0.838583	1.17747	1.07704	1.20001
Sum DB0	PE		+H+					QQQ+ SRM NL141	PE 40:0	% of total PE	%	1.21794	0.441505	0.472197	0.56998	0.444284	0.495398	0.435606	0.423131	0.515544	0.388092	0.709181	0.591615	0.518784	0.536193	0.597341	0.534182	0.779794	0.782704	0.7196	0.757315	0.658537	0.59205	0.749338	0.761727	0.709551	0.731268	0.777393	0.804913	0.686599	0.844088	0.651495	0.696733	0.594041	0.642362	0.722838	0.744	0.775924
Sum DB1	PE		+H+					QQQ+ SRM NL141	PE 40:0	% of total PE	%	0	19.6629	19.3641	19.0388	19.4582	19.2654	19.6882	20.0705	20.4267	19.9092	20.3282	20.0851	20.1458	24.942	24.3888	24.5651	22.0302	22.4598	21.9903	19.1233	18.2746	18.7368	23.5909	23.7599	24.3851	18.7827	19.2105	19.0678	18.6809	18.562	18.0542	20.1317	19.9678	20.1002	16.9066	17.3711	18.2119
Sum DB2	PE		+H+					QQQ+ SRM NL141	PE 40:0	% of total PE	%	0	14.2156	14.2206	14.0889	14.19	14.0383	13.6324	15.5067	14.9581	14.9312	13.093	12.7414	12.7264	20.0455	20.2399	20.1447	17.4631	17.242	18.0171	11.5327	11.6002	11.6015	16.1076	16.2197	16.8622	15.8789	16.3211	16.0917	10.946	11.5206	10.7754	17.4844	17.5883	16.6513	12.5658	13.1547	12.3148
Sum DB3	PE		+H+					QQQ+ SRM NL141	PE 40:0	% of total PE	%	0	8.77066	8.82316	9.26412	8.72459	8.59613	8.3631	9.74842	9.984	10.2163	11.8258	11.6995	11.2007	15.5812	15.6791	15.4814	14.9997	14.5649	14.753	9.46972	9.99107	9.49676	19.0323	19.289	18.8375	18.0546	18.1214	18.5686	9.5097	10.0141	9.66557	25.0753	24.5833	23.3151	17.4935	17.6529	16.9123
Sum DB4	PE		+H+					QQQ+ SRM NL141	PE 40:0	% of total PE	%	0	23.8862	23.4419	22.9115	23.8593	23.4951	24.1136	22.9563	23.4245	22.8469	19.6035	18.6587	20.0156	18.2099	17.8084	17.9192	18.4197	18.0379	18.2477	19.7851	20.2813	19.7358	17.0094	17.1806	16.2783	18.1787	18.2637	17.9345	21.1645	20.6093	21.3011	17.9031	18.5402	19.0522	23.1962	22.7954	23.9599
Sum DB5	PE		+H+					QQQ+ SRM NL141	PE 40:0	% of total PE	%	83.4583	14.6645	14.9397	15.596	15.3963	16.048	15.9553	15.211	14.8149	15.245	12.7787	13.1703	12.9717	10.0055	10.3522	10.6113	11.106	11.4213	11.8258	13.2171	13.3511	13.293	10.0693	9.76321	9.75862	11.3997	11.0231	11.5599	14.2487	13.9889	14.2855	9.54096	9.31739	10.291	12.5116	12.454	12.1716
Sum DB6	PE		+H+					QQQ+ SRM NL141	PE 40:0	% of total PE	%	15.3237	17.9789	18.3057	18.0998	17.5335	17.7212	17.4338	15.657	15.5659	16.1003	21.0871	22.4852	21.9757	10.3789	10.6392	10.4192	14.7733	14.9676	14.065	25.5757	25.375	25.8857	13.1347	12.6363	12.8214	16.4792	15.7492	15.4198	24.23	23.9728	24.7916	8.93198	9.08523	9.60745	16.2013	15.4389	15.2078
Sum DB7	PE		+H+					QQQ+ SRM NL141	PE 40:0	% of total PE	%	0	0.379687	0.43269	0.43089	0.393893	0.340397	0.377901	0.42693	0.310565	0.362986	0.574428	0.568131	0.44538	0.300936	0.295111	0.324906	0.428312	0.523776	0.381501	0.539015	0.468142	0.658396	0.306464	0.389673	0.347323	0.494949	0.533652	0.552835	0.533714	0.488281	0.475147	0.235727	0.323739	0.34039	0.4021	0.389043	0.445633
Sum Total	PE		+H+					QQQ+ SRM NL141	PE 40:0	% of total PE	%	100	100	100	100	100	100	100	100	100	100	100	100	100	100	100	100	100	100	100	100	100	100	100	100	100	100	100	100	100	100	100	100	100	100	100	100	100
PS 32:0	PS	C38H75N1O10P1	+H+	736.512	32	0	0	QQQ+ SRM NL185	PS 40:0	Concentration	nmol/mg protein	0	0	0	0	0	0	0	0	0	0	0	0	0	0	0	0	0	0	0	0	0	0	0	0	0	0	0	0	0	0	0	0	0	0	0	0	0
PS 32:1	PS	C38H73N1O10P1	+H+	734.497	32	1	0	QQQ+ SRM NL185	PS 40:0	Concentration	nmol/mg protein	0	0	0	0	0	0	0	0	0	0	0	0	0	0	0.00493204	0	0	0	0	0	0	0	0	0	0	0	0	0	0	0	0	0	0	0	0	0	0
PS 34:0	PS	C40H79N1O10P1	+H+	764.544	34	0	0	QQQ+ SRM NL185	PS 40:0	Concentration	nmol/mg protein	0	0.0925233	0.0840204	0.0796015	0.103694	0.0755786	0.0684426	0.0620488	0.035729	0.0709997	0	0.0410564	0	0	0	0	0	0	0	0	0	0	0	0	0	0	0.039633	0	0	0	0	0	0	0	0.0807947	0.0587896	0.0548484
PS 34:1	PS	C40H77N1O10P1	+H+	762.528	34	1	0	QQQ+ SRM NL185	PS 40:0	Concentration	nmol/mg protein	0	0.663137	0.421121	0.44621	0.495651	0.54495	0.358753	0.556365	0.359883	0.849418	0	0.358184	0.0114426	0.96034	1.24843	0.716222	0.305891	0.459129	0.496384	0.406608	0.186023	0.00876671	1.09959	1.02645	0.925327	0.329677	0.92821	0.495869	0.12538	0.40603	0.148751	0.536501	0.369089	0.370943	0.605459	0.306105	0.230647
PS 34:2	PS	C40H75N1O10P1	+H+	760.512	34	2	0	QQQ+ SRM NL185	PS 40:0	Concentration	nmol/mg protein	0	0.0513393	0.0373436	0.0540235	0.0763017	0.0430617	0.0383811	0.0649681	0.0233598	0.0898325	0	0	0	0.0616148	0.119188	0.0745308	0.016483	0.0492422	0.0495759	0.022157	0	0	0.0920524	0.07087	0.0669533	0.0240709	0.0748856	0.0301338	0	0	0	0.0372479	0.0570822	0.0603259	0.0574779	0.037291	0.0483068
PS 36:0	PS	C42H83N1O10P1	+H+	792.575	36	0	0	QQQ+ SRM NL185	PS 40:0	Concentration	nmol/mg protein	0	0	0	0.0512576	0	0	0	0	0	0	0	0	0	0	0	0	0	0	0	0	0	0	0	0	0	0	0	0	0	0	0	0	0	0	0	0	0
PS 36:1	PS	C42H81N1O10P1	+H+	790.559	36	1	0	QQQ+ SRM NL185	PS 40:0	Concentration	nmol/mg protein	0	10.0584	8.39895	8.75313	7.85474	7.74046	6.64606	6.79772	5.73374	9.39383	5.15055	10.0421	6.19101	11.4303	13.4568	9.66109	7.77581	9.40403	8.58663	12.1315	9.03491	7.17018	12.5695	11.4658	10.7388	8.13893	13.9417	8.91265	9.21037	12.26	8.42452	10.0389	9.85249	9.47651	9.06007	7.22165	6.24647
PS 36:2	PS	C42H79N1O10P1	+H+	788.544	36	2	0	QQQ+ SRM NL185	PS 40:0	Concentration	nmol/mg protein	0	1.12553	0.873656	0.921445	0.941141	0.770938	0.621227	0.738661	0.589759	1.07655	0.151057	0.552026	0.231057	1.26467	1.54482	1.01277	0.585708	0.933536	0.851248	0.574659	0.321055	0.1409	1.20908	1.09036	1.10366	0.528834	1.08307	0.718409	0.218433	0.444121	0.202176	0.885245	0.737457	0.705357	0.706857	0.458311	0.430016
PS 36:3	PS	C42H77N1O10P1	+H+	786.528	36	3	0	QQQ+ SRM NL185	PS 40:0	Concentration	nmol/mg protein	0	0.10546	0.0689555	0.0770136	0.093255	0.0642049	0.0869079	0.089925	0.0570552	0.144821	0	0.0433531	0	0.096793	0.123056	0.0647375	0.0545609	0.0647515	0.0657312	0	0	0	0.0879127	0.0884844	0.0812624	0	0.0672054	0.0503492	0	0	0	0.0600923	0.064212	0.0555107	0.0667123	0.0662602	0
PS 36:4	PS	C42H75N1O10P1	+H+	784.512	36	4	0	QQQ+ SRM NL185	PS 40:0	Concentration	nmol/mg protein	0	0	0	0	0	0	0	0	0	0	0	0	0	0	0	0	0	0	0	0	0	0	0	0	0	0	0	0	0	0	0	0	0	0	0	0	0
PS 38:1	PS	C44H85N1O10P1	+H+	818.591	38	1	0	QQQ+ SRM NL185	PS 40:0	Concentration	nmol/mg protein	0	0.378324	0.301422	0.274036	0.261094	0.280308	0.209377	0.197354	0.162571	0.26791	0.183252	0.366	0.232194	0.549486	0.655647	0.473362	0.3792	0.43935	0.408529	0.374399	0.31114	0.244961	0.727306	0.788936	0.694989	0.486676	0.791426	0.521864	0.364015	0.362162	0.358657	0.82476	0.686476	0.700372	0.493886	0.448246	0.361348
PS 38:2	PS	C44H83N1O10P1	+H+	816.575	38	2	0	QQQ+ SRM NL185	PS 40:0	Concentration	nmol/mg protein	0	0.451331	0.43312	0.498952	0.401308	0.366694	0.333791	0.313212	0.357776	0.573512	0.32402	0.713856	0.427416	1.24463	1.71914	1.14537	0.888348	0.961739	0.926251	0.763317	0.605071	0.520594	1.907	1.6937	1.64848	1.09113	1.91298	1.29853	0.665342	0.888388	0.541655	1.84308	1.65831	1.36258	0.872222	0.792027	0.739476
PS 38:3	PS	C44H81N1O10P1	+H+	814.559	38	3	0	QQQ+ SRM NL185	PS 40:0	Concentration	nmol/mg protein	0	1.72919	1.40573	1.52141	1.43822	1.37339	1.19285	1.30819	1.04392	1.8878	0.731409	1.26332	0.835186	1.70674	1.9317	1.50402	1.1722	1.34954	1.30702	1.31424	0.927675	0.79713	1.53419	1.35002	1.35052	1.14435	1.78068	1.30662	0.801107	1.22897	0.803802	1.36908	1.28029	1.26612	1.18886	0.907798	0.750692
PS 38:4	PS	C44H79N1O10P1	+H+	812.544	38	4	0	QQQ+ SRM NL185	PS 40:0	Concentration	nmol/mg protein	0	0.605378	0.469352	0.481195	0.486843	0.478472	0.390602	0.435053	0.355123	0.630244	0.117565	0.347747	0.140644	0.333348	0.468968	0.336377	0.284188	0.349809	0.313423	0.444426	0.377066	0.20519	0.395256	0.429687	0.350123	0.296561	0.54117	0.2703	0.393684	0.582201	0.396243	0.349951	0.337215	0.36066	0.878482	0.609294	0.461215
PS 38:5	PS	C44H77N1O10P1	+H+	810.528	38	5	0	QQQ+ SRM NL185	PS 40:0	Concentration	nmol/mg protein	0	0.102781	0.0780904	0.0809763	0.0994532	0.087124	0.104989	0.0910283	0.0707507	0.123129	0	0.0740289	0	0.0667967	0.0778612	0	0	0	0	0.0918464	0.0569426	0	0.0925467	0.0820532	0.0688304	0	0.117796	0.070607	0	0.0744835	0.0762348	0.0813075	0	0	0.130284	0.0873244	0.0961425
PS 38:6	PS	C44H75N1O10P1	+H+	808.512	38	6	0	QQQ+ SRM NL185	PS 40:0	Concentration	nmol/mg protein	0	0.0636156	0.0785639	0.0716082	0.0900672	0.0921664	0.0800352	0.112743	0.0638553	0.0817133	0.0670944	0.101095	0	0.073884	0.0914225	0.0692029	0	0.0641634	0.0821269	0.143889	0.135277	0.127346	0.112145	0.0927466	0.103502	0.0719335	0.169173	0.108651	0.166283	0.217699	0.155816	0.0925526	0.0801395	0.0980833	0.102223	0.080502	0
PS 40:3	PS	C46H85N1O10P1	+H+	842.591	40	3	0	QQQ+ SRM NL185	PS 40:0	Concentration	nmol/mg protein	0	0.308328	0.174645	0.246625	0.219969	0.210668	0.150534	0.235436	0.181511	0.284554	0.261802	0.538393	0.338323	1.09737	1.41721	0.968328	0.82323	0.909919	0.838991	0.900095	0.625971	0.487491	1.79653	1.57145	1.43708	1.47313	2.48485	1.61847	0.911577	1.07846	0.740334	2.9017	2.64959	2.09866	1.98948	1.44915	1.40142
PS 40:4	PS	C46H83N1O10P1	+H+	840.575	40	4	0	QQQ+ SRM NL185	PS 40:0	Concentration	nmol/mg protein	0	0.647193	0.647552	0.708288	0.637972	0.72466	0.510685	0.52411	0.452244	0.813013	0.406875	0.822932	0.460474	0.933106	1.06052	0.839819	0.668659	0.706925	0.667929	1.151	0.898045	0.770521	1.15301	1.11809	0.925844	0.953352	1.28158	0.987892	1.2018	1.74187	1.14108	1.15	1.06894	0.784365	0.973969	0.803325	0.649464
PS 40:5	PS	C46H81N1O10P1	+H+	838.559	40	5	0	QQQ+ SRM NL185	PS 40:0	Concentration	nmol/mg protein	0	1.64773	1.43846	1.29733	1.54797	1.43235	1.16313	1.20652	1.01747	1.44796	0.660861	1.10704	0.695659	1.51678	1.74474	1.33233	0.918678	1.04418	0.982395	1.51022	1.21456	0.934627	1.10214	1.04668	0.910805	1.02006	1.64404	1.13692	1.37078	1.64303	1.27795	1.17935	0.962236	1.10252	0.967069	0.780548	0.697296
PS 40:6	PS	C46H79N1O10P1	+H+	836.544	40	6	0	QQQ+ SRM NL185	PS 40:0	Concentration	nmol/mg protein	0	3.121	2.52088	2.75289	2.87046	2.78942	2.23757	1.86272	1.58775	2.52942	1.19569	2.61584	1.64225	2.90438	3.4652	2.45833	1.61217	1.89863	1.70372	3.63621	2.74709	2.12153	1.85207	1.75455	1.48478	1.96161	3.22835	1.97023	2.90927	4.11514	2.78363	1.94508	1.7543	1.64763	1.78854	1.17668	0.987218
PS 40:7	PS	C46H77N1O10P1	+H+	834.528	40	7	0	QQQ+ SRM NL185	PS 40:0	Concentration	nmol/mg protein	0.0361844	0.176717	0.162332	0.0995402	0.22299	0.185598	0.165262	0.166567	0.137663	0.267095	0.130125	0.165566	0.0818983	0.161539	0.207529	0.137953	0.165631	0.199916	0.113649	0.234831	0.136034	0.120368	0.115142	0.0944378	0.166335	0.206298	0.207987	0.0873171	0.219301	0.253089	0.193475	0.203013	0.113003	0.0874579	0.093146	0.188335	0.0859548
PS 42:5	PS	C48H85N1O10P1	+H+	866.591	42	5	0	QQQ+ SRM NL185	PS 40:0	Concentration	nmol/mg protein	0	0	0	0	0.0836883	0	0	0	0	0	0	0	0	0.0790006	0.0754288	0	0	0	0	0	0	0	0	0	0	0	0	0	0	0	0	0	0	0	0	0	0
PS 42:6	PS	C48H83N1O10P1	+H+	864.575	42	6	0	QQQ+ SRM NL185	PS 40:0	Concentration	nmol/mg protein	0	0.154892	0.122841	0.115934	0.0899868	0.124338	0.0725883	0	0	0.151456	0	0	0	0.0761418	0.120631	0.0907707	0	0	0	0.100739	0.0792332	0	0	0	0	0	0.115667	0	0	0	0	0	0	0	0	0	0
PS 42:7	PS	C48H81N1O10P1	+H+	862.559	42	7	0	QQQ+ SRM NL185	PS 40:0	Concentration	nmol/mg protein	0	0	0	0	0	0	0	0	0	0	0	0	0	0.0789296	0	0.0849417	0	0	0	0	0	0	0	0	0	0.0919368	0	0	0	0	0	0	0	0	0	0	0
Sum C32	PS		+H+					QQQ+ SRM NL185	PS 40:0	Concentration	nmol/mg protein															0.00493204
Sum C34	PS		+H+					QQQ+ SRM NL185	PS 40:0	Concentration	nmol/mg protein		0.806999	0.542485	0.579835	0.675647	0.66359	0.465577	0.683382	0.418971	1.01025		0.399241	0.0114426	1.02195	1.36762	0.790753	0.322374	0.508371	0.54596	0.428765	0.186023	0.00876671	1.19164	1.09732	0.99228	0.353748	1.04273	0.526003	0.12538	0.40603	0.148751	0.573749	0.426171	0.431269	0.743731	0.402185	0.333802
Sum C36	PS		+H+					QQQ+ SRM NL185	PS 40:0	Concentration	nmol/mg protein		11.2894	9.34156	9.80285	8.88914	8.57561	7.35419	7.62631	6.38056	10.6152	5.30161	10.6374	6.42207	12.7918	15.1247	10.7386	8.41608	10.4023	9.50361	12.7061	9.35596	7.31108	13.8664	12.6446	11.9237	8.66776	15.092	9.68141	9.4288	12.7041	8.62669	10.9843	10.6542	10.2374	9.83364	7.74622	6.67649
Sum C38	PS		+H+					QQQ+ SRM NL185	PS 40:0	Concentration	nmol/mg protein		3.33062	2.76628	2.92818	2.77699	2.67816	2.31165	2.45758	2.054	3.56431	1.42334	2.86604	1.63544	3.97489	4.94473	3.52833	2.72394	3.1646	3.03735	3.13211	2.41317	1.89522	4.76845	4.43714	4.21644	3.09065	5.31322	3.57657	2.39043	3.3539	2.33241	4.56074	4.04243	3.78781	3.66596	2.92519	2.40887
Sum C40	PS		+H+					QQQ+ SRM NL185	PS 40:0	Concentration	nmol/mg protein	0.0361844	5.90097	4.94386	5.10467	5.49936	5.34269	4.22718	3.99536	3.37664	5.34204	2.65536	5.24977	3.21861	6.61317	7.89521	5.73675	4.18837	4.75958	4.30668	7.43235	5.6217	4.43454	6.01889	5.58521	4.92484	5.61445	8.84681	5.80083	6.61273	8.8316	6.13647	7.37915	6.54807	5.72063	5.8122	4.39804	3.82135
Sum C42	PS		+H+					QQQ+ SRM NL185	PS 40:0	Concentration	nmol/mg protein		0.154892	0.122841	0.115934	0.173675	0.124338	0.0725883			0.151456				0.234072	0.19606	0.175712				0.100739	0.0792332					0.0919368	0.115667
Sum DB0	PS		+H+					QQQ+ SRM NL185	PS 40:0	Concentration	nmol/mg protein		0.0925233	0.0840204	0.130859	0.103694	0.0755786	0.0684426	0.0620488	0.035729	0.0709997		0.0410564															0.039633								0.0807947	0.0587896	0.0548484
Sum DB1	PS		+H+					QQQ+ SRM NL185	PS 40:0	Concentration	nmol/mg protein		11.0999	9.1215	9.47338	8.61149	8.56572	7.21419	7.55144	6.2562	10.5112	5.3338	10.7662	6.43465	12.9401	15.3658	10.8507	8.46091	10.3025	9.49154	12.9125	9.53207	7.42391	14.3964	13.2812	12.3591	8.95528	15.6614	9.93038	9.69977	13.0281	8.93192	11.4002	10.9081	10.5478	10.1594	7.976	6.83847
Sum DB2	PS		+H+					QQQ+ SRM NL185	PS 40:0	Concentration	nmol/mg protein		1.6282	1.34412	1.47442	1.41875	1.18069	0.993399	1.11684	0.970895	1.73989	0.475077	1.26588	0.658474	2.57092	3.38315	2.23267	1.49054	1.94452	1.82707	1.36013	0.926126	0.661494	3.20813	2.85493	2.8191	1.64404	3.07093	2.04707	0.883775	1.33251	0.743831	2.76558	2.45285	2.12826	1.63656	1.28763	1.2178
Sum DB3	PS		+H+					QQQ+ SRM NL185	PS 40:0	Concentration	nmol/mg protein		2.14298	1.64933	1.84505	1.75144	1.64827	1.43029	1.63355	1.28249	2.31718	0.993212	1.84507	1.17351	2.90091	3.47196	2.53708	2.04999	2.32421	2.21174	2.21433	1.55365	1.28462	3.41864	3.00995	2.86886	2.61747	4.33273	2.97544	1.71268	2.30743	1.54414	4.33087	3.99409	3.42028	3.24505	2.42321	2.15211
Sum DB4	PS		+H+					QQQ+ SRM NL185	PS 40:0	Concentration	nmol/mg protein		1.25257	1.1169	1.18948	1.12481	1.20313	0.901287	0.959164	0.807367	1.44326	0.52444	1.17068	0.601118	1.26645	1.52949	1.1762	0.952847	1.05673	0.981352	1.59542	1.27511	0.975711	1.54826	1.54778	1.27597	1.24991	1.82275	1.25819	1.59549	2.32408	1.53732	1.49995	1.40615	1.14503	1.85245	1.41262	1.11068
Sum DB5	PS		+H+					QQQ+ SRM NL185	PS 40:0	Concentration	nmol/mg protein		1.75051	1.51655	1.37831	1.73111	1.51947	1.26812	1.29755	1.08822	1.57109	0.660861	1.18107	0.695659	1.66257	1.89803	1.33233	0.918678	1.04418	0.982395	1.60207	1.2715	0.934627	1.19468	1.12873	0.979635	1.02006	1.76184	1.20752	1.37078	1.71752	1.35418	1.26065	0.962236	1.10252	1.09735	0.867873	0.793439
Sum DB6	PS		+H+					QQQ+ SRM NL185	PS 40:0	Concentration	nmol/mg protein		3.33951	2.72228	2.94043	3.05051	3.00592	2.39019	1.97547	1.65161	2.76259	1.26279	2.71693	1.64225	3.0544	3.67726	2.6183	1.61217	1.9628	1.78585	3.88084	2.9616	2.24888	1.96421	1.8473	1.58828	2.03355	3.51319	2.07888	3.07555	4.33284	2.93945	2.03764	1.83444	1.74571	1.89076	1.25718	0.987218
Sum DB7	PS		+H+					QQQ+ SRM NL185	PS 40:0	Concentration	nmol/mg protein	0.0361844	0.176717	0.162332	0.0995402	0.22299	0.185598	0.165262	0.166567	0.137663	0.267095	0.130125	0.165566	0.0818983	0.240468	0.207529	0.222895	0.165631	0.199916	0.113649	0.234831	0.136034	0.120368	0.115142	0.0944378	0.166335	0.298235	0.207987	0.0873171	0.219301	0.253089	0.193475	0.203013	0.113003	0.0874579	0.093146	0.188335	0.0859548
Sum Total	PS		+H+					QQQ+ SRM NL185	PS 40:0	Concentration	nmol/mg protein	0.0361844	21.4829	17.717	18.5315	18.0148	17.3844	14.4312	14.7626	12.2302	20.6833	9.38031	19.1525	11.2876	24.6359	29.5332	20.9701	15.6508	18.8349	17.3936	23.8001	17.6561	13.6496	25.8454	23.7643	22.0573	17.8186	30.4104	19.5848	18.5573	25.2956	17.2443	23.4979	21.6708	20.1771	20.0555	15.4716	13.2405
PS 32:0	PS	C38H75N1O10P1	+H+	736.512	32	0	0	QQQ+ SRM NL185	PS 40:0	% of total PS	%	0	0	0	0	0	0	0	0	0	0	0	0	0	0	0	0	0	0	0	0	0	0	0	0	0	0	0	0	0	0	0	0	0	0	0	0	0
PS 32:1	PS	C38H73N1O10P1	+H+	734.497	32	1	0	QQQ+ SRM NL185	PS 40:0	% of total PS	%	0	0	0	0	0	0	0	0	0	0	0	0	0	0	0.0167	0	0	0	0	0	0	0	0	0	0	0	0	0	0	0	0	0	0	0	0	0	0
PS 34:0	PS	C40H79N1O10P1	+H+	764.544	34	0	0	QQQ+ SRM NL185	PS 40:0	% of total PS	%	0	0.430684	0.474235	0.429548	0.575603	0.43475	0.474269	0.42031	0.292138	0.343271	0	0.214366	0	0	0	0	0	0	0	0	0	0	0	0	0	0	0.130327	0	0	0	0	0	0	0	0.402855	0.379983	0.414247
PS 34:1	PS	C40H77N1O10P1	+H+	762.528	34	1	0	QQQ+ SRM NL185	PS 40:0	% of total PS	%	0	3.08681	2.37693	2.40785	2.75135	3.13471	2.48596	3.76874	2.94258	4.10679	0	1.87017	0.101374	3.89814	4.22722	3.41544	1.95448	2.43765	2.85383	1.70843	1.05359	0.0642268	4.25449	4.31928	4.19511	1.85019	3.05227	2.53191	0.675633	1.60514	0.862608	2.28319	1.70316	1.83844	3.01891	1.97849	1.74198
PS 34:2	PS	C40H75N1O10P1	+H+	760.512	34	2	0	QQQ+ SRM NL185	PS 40:0	% of total PS	%	0	0.238978	0.210778	0.291523	0.42355	0.247703	0.26596	0.440085	0.191002	0.434325	0	0	0	0.250102	0.403573	0.355414	0.105317	0.261442	0.285024	0.0930963	0	0	0.356165	0.298221	0.303543	0.135089	0.24625	0.153863	0	0	0	0.158516	0.263406	0.298982	0.286594	0.241028	0.36484
PS 36:0	PS	C42H83N1O10P1	+H+	792.575	36	0	0	QQQ+ SRM NL185	PS 40:0	% of total PS	%	0	0	0	0.276598	0	0	0	0	0	0	0	0	0	0	0	0	0	0	0	0	0	0	0	0	0	0	0	0	0	0	0	0	0	0	0	0	0
PS 36:1	PS	C42H81N1O10P1	+H+	790.559	36	1	0	QQQ+ SRM NL185	PS 40:0	% of total PS	%	0	46.8206	47.4061	47.2339	43.6016	44.5254	46.0535	46.0468	46.882	45.4176	54.9082	52.4321	54.8481	46.397	45.5649	46.0707	49.6833	49.9288	49.3666	50.9724	51.1716	52.5303	48.6332	48.248	48.6859	45.6767	45.8452	45.508	49.632	48.4667	48.8539	42.7226	45.4643	46.9667	45.1749	46.6767	47.1769
PS 36:2	PS	C42H79N1O10P1	+H+	788.544	36	2	0	QQQ+ SRM NL185	PS 40:0	% of total PS	%	0	5.2392	4.93117	4.97233	5.22426	4.43466	4.30475	5.00359	4.82217	5.20492	1.61037	2.88227	2.04701	5.13346	5.2308	4.82958	3.74236	4.95642	4.89403	2.41452	1.81838	1.03226	4.67812	4.58822	5.00363	2.96788	3.5615	3.66819	1.17707	1.75572	1.17242	3.76734	3.403	3.49583	3.5245	2.96227	3.24773
PS 36:3	PS	C42H77N1O10P1	+H+	786.528	36	3	0	QQQ+ SRM NL185	PS 40:0	% of total PS	%	0	0.490901	0.389205	0.415583	0.517657	0.369325	0.602223	0.60914	0.466512	0.700184	0	0.226357	0	0.392895	0.416669	0.308713	0.348615	0.343785	0.377905	0	0	0	0.340148	0.372342	0.368416	0	0.220994	0.257083	0	0	0	0.255735	0.296306	0.275117	0.332638	0.428269	0
PS 36:4	PS	C42H75N1O10P1	+H+	784.512	36	4	0	QQQ+ SRM NL185	PS 40:0	% of total PS	%	0	0	0	0	0	0	0	0	0	0	0	0	0	0	0	0	0	0	0	0	0	0	0	0	0	0	0	0	0	0	0	0	0	0	0	0	0
PS 38:1	PS	C44H85N1O10P1	+H+	818.591	38	1	0	QQQ+ SRM NL185	PS 40:0	% of total PS	%	0	1.76105	1.70131	1.47876	1.44933	1.61241	1.45087	1.33685	1.32926	1.2953	1.95358	1.91098	2.05708	2.23043	2.22003	2.25731	2.42289	2.33264	2.34873	1.5731	1.76222	1.79464	2.81406	3.31984	3.15084	2.73129	2.60248	2.66464	1.96157	1.43172	2.07986	3.50993	3.16774	3.47113	2.46259	2.89721	2.7291
PS 38:2	PS	C44H83N1O10P1	+H+	816.575	38	2	0	QQQ+ SRM NL185	PS 40:0	% of total PS	%	0	2.10089	2.44466	2.69246	2.22766	2.10933	2.31299	2.12166	2.92536	2.77283	3.45426	3.72722	3.78661	5.05211	5.82102	5.4619	5.67607	5.10616	5.32524	3.2072	3.42698	3.81398	7.37849	7.12709	7.47366	6.12359	6.29053	6.6303	3.58533	3.51202	3.14106	7.84362	7.65227	6.75309	4.34903	5.11922	5.58495
PS 38:3	PS	C44H81N1O10P1	+H+	814.559	38	3	0	QQQ+ SRM NL185	PS 40:0	% of total PS	%	0	8.04916	7.93433	8.20988	7.98355	7.90016	8.2658	8.86149	8.53563	9.1272	7.79729	6.59611	7.39917	6.92788	6.54075	7.17218	7.48974	7.1651	7.51436	5.52197	5.25413	5.83994	5.93603	5.68086	6.12278	6.42222	5.85549	6.6716	4.31693	4.85841	4.66126	5.8264	5.90788	6.27502	5.92784	5.8675	5.66966
PS 38:4	PS	C44H79N1O10P1	+H+	812.544	38	4	0	QQQ+ SRM NL185	PS 40:0	% of total PS	%	0	2.81795	2.64916	2.59664	2.70246	2.75231	2.70666	2.94699	2.90367	3.04712	1.25332	1.81568	1.24601	1.3531	1.58793	1.60408	1.81581	1.85724	1.80195	1.86733	2.13562	1.50327	1.52931	1.80812	1.58734	1.66434	1.77955	1.38015	2.12145	2.30159	2.29782	1.48929	1.55608	1.78747	4.38025	3.93814	3.48336
PS 38:5	PS	C44H77N1O10P1	+H+	810.528	38	5	0	QQQ+ SRM NL185	PS 40:0	% of total PS	%	0	0.478433	0.440765	0.436967	0.552064	0.501163	0.727515	0.616613	0.578493	0.595309	0	0.386523	0	0.271136	0.26364	0	0	0	0	0.385907	0.32251	0	0.358078	0.345279	0.312053	0	0.387352	0.360519	0	0.294452	0.442087	0.34602	0	0	0.649618	0.564416	0.726123
PS 38:6	PS	C44H75N1O10P1	+H+	808.512	38	6	0	QQQ+ SRM NL185	PS 40:0	% of total PS	%	0	0.296122	0.443437	0.386414	0.499962	0.530168	0.554599	0.763705	0.522113	0.39507	0.715268	0.52784	0	0.299904	0.309558	0.330007	0	0.340663	0.472168	0.604571	0.766176	0.932962	0.433907	0.390277	0.469244	0.4037	0.556298	0.55477	0.896048	0.86062	0.903577	0.393876	0.369803	0.486112	0.509698	0.52032	0
PS 40:3	PS	C46H85N1O10P1	+H+	842.591	40	3	0	QQQ+ SRM NL185	PS 40:0	% of total PS	%	0	1.43523	0.985747	1.33085	1.22105	1.21182	1.04312	1.59481	1.48412	1.37577	2.79098	2.81109	2.99731	4.45437	4.79869	4.61765	5.26	4.83104	4.82356	3.78189	3.54535	3.57147	6.95107	6.61264	6.51522	8.26738	8.17104	8.26392	4.91222	4.26345	4.2932	12.3488	12.2265	10.4012	9.91984	9.36649	10.5843
PS 40:4	PS	C46H83N1O10P1	+H+	840.575	40	4	0	QQQ+ SRM NL185	PS 40:0	% of total PS	%	0	3.0126	3.65497	3.82208	3.54137	4.16845	3.53876	3.55025	3.69777	3.93078	4.33755	4.29674	4.07948	3.78759	3.59095	4.00483	4.27237	3.75328	3.84009	4.83609	5.08632	5.645	4.46117	4.70492	4.19746	5.35033	4.21427	5.04417	6.47615	6.88608	6.61714	4.89407	4.93261	3.8874	4.85636	5.19224	4.90513
PS 40:5	PS	C46H81N1O10P1	+H+	838.559	40	5	0	QQQ+ SRM NL185	PS 40:0	% of total PS	%	0	7.66998	8.11908	7.0007	8.59278	8.23929	8.05983	8.1728	8.31934	7.00062	7.0452	5.78013	6.16306	6.15678	5.90774	6.35344	5.86986	5.54389	5.64803	6.34543	6.87899	6.84728	4.26434	4.4044	4.12928	5.72473	5.40618	5.80509	7.3867	6.49533	7.41082	5.01895	4.44024	5.46423	4.82196	5.04503	5.26638
PS 40:6	PS	C46H79N1O10P1	+H+	836.544	40	6	0	QQQ+ SRM NL185	PS 40:0	% of total PS	%	0	14.5278	14.2285	14.8552	15.9339	16.0455	15.5051	12.6178	12.9823	12.2293	12.7468	13.658	14.5492	11.7892	11.7332	11.723	10.3009	10.0804	9.7951	15.2781	15.5589	15.5428	7.16594	7.38315	6.73147	11.0088	10.6159	10.06	15.6772	16.2682	16.1423	8.2777	8.09521	8.16584	8.91794	7.60539	7.45603
PS 40:7	PS	C46H77N1O10P1	+H+	834.528	40	7	0	QQQ+ SRM NL185	PS 40:0	% of total PS	%	100	0.822593	0.916248	0.537141	1.23782	1.06761	1.14518	1.1283	1.1256	1.29136	1.38722	0.864462	0.725562	0.655705	0.702696	0.657857	1.05829	1.06142	0.653394	0.98668	0.770464	0.881845	0.445502	0.397394	0.754105	1.15777	0.683932	0.445841	1.18175	1.00053	1.12197	0.863961	0.521452	0.433452	0.464441	1.21729	0.64918
PS 42:5	PS	C48H85N1O10P1	+H+	866.591	42	5	0	QQQ+ SRM NL185	PS 40:0	% of total PS	%	0	0	0	0	0.464553	0	0	0	0	0	0	0	0	0.320673	0.255403	0	0	0	0	0	0	0	0	0	0	0	0	0	0	0	0	0	0	0	0	0	0
PS 42:6	PS	C48H83N1O10P1	+H+	864.575	42	6	0	QQQ+ SRM NL185	PS 40:0	% of total PS	%	0	0.721004	0.693347	0.625605	0.499516	0.71523	0.502996	0	0	0.732265	0	0	0	0.309069	0.408458	0.432857	0	0	0	0.423272	0.448758	0	0	0	0	0	0.380354	0	0	0	0	0	0	0	0	0	0
PS 42:7	PS	C48H81N1O10P1	+H+	862.559	42	7	0	QQQ+ SRM NL185	PS 40:0	% of total PS	%	0	0	0	0	0	0	0	0	0	0	0	0	0	0.320385	0	0.40506	0	0	0	0	0	0	0	0	0	0.515961	0	0	0	0	0	0	0	0	0	0	0
Sum C32	PS		+H+					QQQ+ SRM NL185	PS 40:0	% of total PS	%	0	0	0	0	0	0	0	0	0	0	0	0	0	0	0.0167	0	0	0	0	0	0	0	0	0	0	0	0	0	0	0	0	0	0	0	0	0	0
Sum C34	PS		+H+					QQQ+ SRM NL185	PS 40:0	% of total PS	%	0	3.75648	3.06194	3.12892	3.75051	3.81716	3.22619	4.62914	3.42572	4.88439	0	2.08454	0.101374	4.14824	4.63079	3.77085	2.0598	2.69909	3.13885	1.80152	1.05359	0.0642268	4.61066	4.6175	4.49866	1.98528	3.42885	2.68577	0.675633	1.60514	0.862608	2.4417	1.96657	2.13742	3.70836	2.5995	2.52106
Sum C36	PS		+H+					QQQ+ SRM NL185	PS 40:0	% of total PS	%	0	52.5507	52.7265	52.8984	49.3435	49.3294	50.9604	51.6596	52.1706	51.3227	56.5185	55.5407	56.8951	51.9234	51.2124	51.209	53.7743	55.2291	54.6385	53.3869	52.99	53.5626	53.6515	53.2085	54.0579	48.6446	49.6277	49.4332	50.809	50.2225	50.0263	46.7457	49.1636	50.7376	49.0321	50.0673	50.4247
Sum C38	PS		+H+					QQQ+ SRM NL185	PS 40:0	% of total PS	%	0	15.5036	15.6137	15.8011	15.415	15.4055	16.0184	16.6473	16.7945	17.2328	15.1737	14.9643	14.4889	16.1346	16.7429	16.8255	17.4045	16.8018	17.4625	13.1601	13.6676	13.8848	18.4499	18.6715	19.1159	17.3451	17.4717	18.262	12.8813	13.2588	13.5257	19.4091	18.6538	18.7728	18.279	18.9068	18.1932
Sum C40	PS		+H+					QQQ+ SRM NL185	PS 40:0	% of total PS	%	100	27.4682	27.9046	27.546	30.5269	30.7327	29.292	27.064	27.6091	25.8278	28.3078	27.4104	28.5146	26.8437	26.7333	27.3568	26.7614	25.27	24.7602	31.2282	31.84	32.4884	23.288	23.5025	22.3275	31.509	29.0913	29.619	35.634	34.9136	35.5854	31.4034	30.2161	28.3521	28.9805	28.4264	28.8611
Sum C42	PS		+H+					QQQ+ SRM NL185	PS 40:0	% of total PS	%	0	0.721004	0.693347	0.625605	0.964069	0.71523	0.502996	0	0	0.732265	0	0	0	0.950127	0.663861	0.837917	0	0	0	0.423272	0.448758	0	0	0	0	0.515961	0.380354	0	0	0	0	0	0	0	0	0	0
Sum DB0	PS		+H+					QQQ+ SRM NL185	PS 40:0	% of total PS	%	0	0.430684	0.474235	0.706145	0.575603	0.43475	0.474269	0.42031	0.292138	0.343271	0	0.214366	0	0	0	0	0	0	0	0	0	0	0	0	0	0	0.130327	0	0	0	0	0	0	0	0.402855	0.379983	0.414247
Sum DB1	PS		+H+					QQQ+ SRM NL185	PS 40:0	% of total PS	%	0	51.6684	51.4843	51.1205	47.8023	49.2725	49.9903	51.1524	51.1538	50.8197	56.8617	56.2133	57.0066	52.5256	52.0289	51.7434	54.0607	54.6991	54.5692	54.2539	53.9874	54.3892	55.7017	55.8871	56.0318	50.2582	51.5	50.7045	52.2692	51.5036	51.7963	48.5158	50.3352	52.2763	50.6564	51.5524	51.648
Sum DB2	PS		+H+					QQQ+ SRM NL185	PS 40:0	% of total PS	%	0	7.57907	7.5866	7.95631	7.87547	6.79169	6.8837	7.56533	7.93853	8.41208	5.06463	6.60949	5.83362	10.4357	11.4554	10.6469	9.52375	10.324	10.5043	5.71482	5.24536	4.84625	12.4128	12.0135	12.7808	9.22656	10.0983	10.4524	4.7624	5.26775	4.31348	11.7695	11.3187	10.5479	8.16013	8.32251	9.19751
Sum DB3	PS		+H+					QQQ+ SRM NL185	PS 40:0	% of total PS	%	0	9.97529	9.30928	9.95631	9.72225	9.48131	9.91114	11.0654	10.4863	11.2032	10.5883	9.63355	10.3965	11.7751	11.7561	12.0985	13.0983	12.3399	12.7158	9.30386	8.79949	9.41141	13.2272	12.6658	13.0064	14.6896	14.2475	15.1926	9.22915	9.12186	8.95446	18.4309	18.4307	16.9513	16.1803	15.6623	16.254
Sum DB4	PS		+H+					QQQ+ SRM NL185	PS 40:0	% of total PS	%	0	5.83055	6.30412	6.41872	6.24383	6.92076	6.24542	6.49724	6.60144	6.9779	5.59087	6.11241	5.32549	5.14069	5.17889	5.60891	6.08818	5.61052	5.64203	6.70342	7.22194	7.14827	5.99047	6.51304	5.7848	7.01467	5.99382	6.42432	8.5976	9.18767	8.91496	6.38336	6.48869	5.67488	9.23661	9.13038	8.38849
Sum DB5	PS		+H+					QQQ+ SRM NL185	PS 40:0	% of total PS	%	0	8.14841	8.55984	7.43766	9.60939	8.74045	8.78734	8.78942	8.89783	7.59593	7.0452	6.16665	6.16306	6.74859	6.42678	6.35344	5.86986	5.54389	5.64803	6.73134	7.2015	6.84728	4.62242	4.74968	4.44133	5.72473	5.79353	6.16561	7.3867	6.78978	7.85291	5.36497	4.44024	5.46423	5.47158	5.60945	5.99251
Sum DB6	PS		+H+					QQQ+ SRM NL185	PS 40:0	% of total PS	%	0	15.545	15.3653	15.8672	16.9334	17.2909	16.5627	13.3815	13.5044	13.3566	13.4621	14.1858	14.5492	12.3982	12.4513	12.4858	10.3009	10.4211	10.2673	16.306	16.7738	16.4758	7.59984	7.77342	7.20072	11.4125	11.5526	10.6148	16.5732	17.1288	17.0459	8.67157	8.46502	8.65195	9.42764	8.12571	7.45603
Sum DB7	PS		+H+					QQQ+ SRM NL185	PS 40:0	% of total PS	%	100	0.822593	0.916248	0.537141	1.23782	1.06761	1.14518	1.1283	1.1256	1.29136	1.38722	0.864462	0.725562	0.97609	0.702696	1.06292	1.05829	1.06142	0.653394	0.98668	0.770464	0.881845	0.445502	0.397394	0.754105	1.67373	0.683932	0.445841	1.18175	1.00053	1.12197	0.863961	0.521452	0.433452	0.464441	1.21729	0.64918
Sum Total	PS		+H+					QQQ+ SRM NL185	PS 40:0	% of total PS	%	100	100	100	100	100	100	100	100	100	100	100	100	100	100	100	100	100	100	100	100	100	100	100	100	100	100	100	100	100	100	100	100	100	100	100	100	100
PG 30:0	PG	C36H75N1O10P1	+NH4+	712.512	30	0	0	QQQ+ SRM NL189	PG 40:0	Concentration	nmol/mg protein	0	0	0	0	0	0	0	0	0	0	0	0	0	0	0	0	0	0	0	0	0	0	0	0	0	0	0	0	0	0	0	0	0	0	0	0	0
PG 30:1	PG	C36H73N1O10P1	+NH4+	710.497	30	1	0	QQQ+ SRM NL189	PG 40:0	Concentration	nmol/mg protein	0	0	0	0	0	0	0	0	0	0	0	0	0	0	0	0	0	0	0	0	0	0	0	0	0	0	0	0	0	0	0	0	0	0	0	0	0
PG 32:0	PG	C38H79N1O10P1	+NH4+	740.544	32	0	0	QQQ+ SRM NL189	PG 40:0	Concentration	nmol/mg protein	0	0	0	0	0	0	0	0	0	0	0	0	0	0	0	0	0	0	0	0	0	0	0	0	0	0	0	0	0	0	0	0	0	0	0	0	0
PG 32:1	PG	C38H77N1O10P1	+NH4+	738.528	32	1	0	QQQ+ SRM NL189	PG 40:0	Concentration	nmol/mg protein	0	0	0	0	0	0	0	0	0	0	0	0	0	0	0	0	0	0	0	0	0	0	0.0366611	0.0319258	0.037424	0	0	0	0	0	0	0	0	0	0	0	0
PG 32:2	PG	C38H75N1O10P1	+NH4+	736.512	32	2	0	QQQ+ SRM NL189	PG 40:0	Concentration	nmol/mg protein	0	0	0	0	0	0	0	0	0	0	0	0	0	0	0	0	0	0	0	0	0	0	0	0	0	0	0	0	0	0	0	0	0	0	0	0	0
PG 34:1	PG	C40H81N1O10P1	+NH4+	766.559	34	1	0	QQQ+ SRM NL189	PG 40:0	Concentration	nmol/mg protein	0	0.0712887	0.0533819	0.0632296	0.0653497	0.0585731	0.0449223	0.0472935	0.0467127	0.0746719	0.0269295	0.0519716	0.036907	0.0929905	0.12287	0.0879294	0.0520565	0.0738307	0.0758032	0.058336	0.0384262	0.0390072	0.237948	0.198612	0.186424	0.0644226	0.101485	0.0634391	0.0399956	0.0521862	0.0442382	0.160086	0.135372	0.148891	0.121112	0.0854438	0.0812406
PG 34:2	PG	C40H79N1O10P1	+NH4+	764.544	34	2	0	QQQ+ SRM NL189	PG 40:0	Concentration	nmol/mg protein	0	0	0	0	0	0	0	0	0	0	0	0	0	0	0	0	0	0	0	0	0	0	0.0679507	0.0775627	0.0821439	0	0	0	0	0	0	0	0	0	0	0	0
PG 36:1	PG	C42H85N1O10P1	+NH4+	794.591	36	1	0	QQQ+ SRM NL189	PG 40:0	Concentration	nmol/mg protein	0	0.0642492	0.0524972	0.0488324	0.0623136	0.0551445	0.0459151	0.0508754	0.0463741	0.0691062	0.0357143	0.0595789	0.0451214	0.108097	0.127667	0.0843738	0.0595672	0.0648476	0.0643577	0.0679848	0.046919	0.0443705	0.29681	0.272748	0.232863	0.0653051	0.11059	0.0699964	0.0542683	0.0622491	0.0457089	0.160959	0.155526	0.136657	0.11384	0.0936736	0.0934244
PG 36:2	PG	C42H83N1O10P1	+NH4+	792.575	36	2	0	QQQ+ SRM NL189	PG 40:0	Concentration	nmol/mg protein	0	0	0	0	0	0	0	0	0	0	0	0	0	0.0319123	0.0368145	0.0263904	0.0253347	0.025461	0.0226608	0	0.0265599	0	0.163196	0.161937	0.14378	0.0331208	0.0499279	0.0342087	0	0.0319942	0	0.0507496	0.0527706	0.0630569	0.0586199	0.0455013	0.0562667
PG 36:3	PG	C42H81N1O10P1	+NH4+	790.559	36	3	0	QQQ+ SRM NL189	PG 40:0	Concentration	nmol/mg protein	0	0	0	0	0	0	0	0	0	0	0	0	0	0	0	0	0	0	0	0	0	0	0.0384788	0.0335419	0.0311013	0	0	0	0	0	0	0	0	0	0	0	0
PG 38:4	PG	C44H83N1O10P1	+NH4+	816.575	38	4	0	QQQ+ SRM NL189	PG 40:0	Concentration	nmol/mg protein	0	0	0	0	0	0	0	0	0	0	0	0	0	0	0	0	0	0	0	0	0	0	0.0281143	0.0274855	0.0263187	0	0	0	0	0	0	0	0	0	0	0	0
Sum C30	PG		+NH4+					QQQ+ SRM NL189	PG 40:0	Concentration	nmol/mg protein
Sum C32	PG		+NH4+					QQQ+ SRM NL189	PG 40:0	Concentration	nmol/mg protein																							0.0366611	0.0319258	0.037424
Sum C34	PG		+NH4+					QQQ+ SRM NL189	PG 40:0	Concentration	nmol/mg protein		0.0712887	0.0533819	0.0632296	0.0653497	0.0585731	0.0449223	0.0472935	0.0467127	0.0746719	0.0269295	0.0519716	0.036907	0.0929905	0.12287	0.0879294	0.0520565	0.0738307	0.0758032	0.058336	0.0384262	0.0390072	0.305899	0.276175	0.268568	0.0644226	0.101485	0.0634391	0.0399956	0.0521862	0.0442382	0.160086	0.135372	0.148891	0.121112	0.0854438	0.0812406
Sum C36	PG		+NH4+					QQQ+ SRM NL189	PG 40:0	Concentration	nmol/mg protein		0.0642492	0.0524972	0.0488324	0.0623136	0.0551445	0.0459151	0.0508754	0.0463741	0.0691062	0.0357143	0.0595789	0.0451214	0.140009	0.164482	0.110764	0.0849019	0.0903085	0.0870185	0.0679848	0.0734789	0.0443705	0.498484	0.468227	0.407744	0.0984259	0.160518	0.104205	0.0542683	0.0942433	0.0457089	0.211709	0.208297	0.199714	0.17246	0.139175	0.149691
Sum C38	PG		+NH4+					QQQ+ SRM NL189	PG 40:0	Concentration	nmol/mg protein																							0.0281143	0.0274855	0.0263187
Sum DB0	PG		+NH4+					QQQ+ SRM NL189	PG 40:0	Concentration	nmol/mg protein
Sum DB1	PG		+NH4+					QQQ+ SRM NL189	PG 40:0	Concentration	nmol/mg protein		0.135538	0.105879	0.112062	0.127663	0.113718	0.0908373	0.098169	0.0930868	0.143778	0.0626438	0.11155	0.0820284	0.201087	0.250537	0.172303	0.111624	0.138678	0.140161	0.126321	0.0853452	0.0833777	0.571419	0.503286	0.456711	0.129728	0.212075	0.133436	0.0942639	0.114435	0.089947	0.321046	0.290898	0.285547	0.234952	0.179117	0.174665
Sum DB2	PG		+NH4+					QQQ+ SRM NL189	PG 40:0	Concentration	nmol/mg protein														0.0319123	0.0368145	0.0263904	0.0253347	0.025461	0.0226608		0.0265599		0.231146	0.239499	0.225923	0.0331208	0.0499279	0.0342087		0.0319942		0.0507496	0.0527706	0.0630569	0.0586199	0.0455013	0.0562667
Sum DB3	PG		+NH4+					QQQ+ SRM NL189	PG 40:0	Concentration	nmol/mg protein																							0.0384788	0.0335419	0.0311013
Sum DB4	PG		+NH4+					QQQ+ SRM NL189	PG 40:0	Concentration	nmol/mg protein																							0.0281143	0.0274855	0.0263187
Sum Total	PG		+NH4+					QQQ+ SRM NL189	PG 40:0	Concentration	nmol/mg protein		0.135538	0.105879	0.112062	0.127663	0.113718	0.0908373	0.098169	0.0930868	0.143778	0.0626438	0.11155	0.0820284	0.232999	0.287351	0.198694	0.136958	0.164139	0.162822	0.126321	0.111905	0.0833777	0.869159	0.803813	0.740055	0.162849	0.262003	0.167644	0.0942639	0.14643	0.089947	0.371795	0.343669	0.348604	0.293571	0.224619	0.230932
PG 30:0	PG	C36H75N1O10P1	+NH4+	712.512	30	0	0	QQQ+ SRM NL189	PG 40:0	% of total PG	%		0	0	0	0	0	0	0	0	0	0	0	0	0	0	0	0	0	0	0	0	0	0	0	0	0	0	0	0	0	0	0	0	0	0	0	0
PG 30:1	PG	C36H73N1O10P1	+NH4+	710.497	30	1	0	QQQ+ SRM NL189	PG 40:0	% of total PG	%		0	0	0	0	0	0	0	0	0	0	0	0	0	0	0	0	0	0	0	0	0	0	0	0	0	0	0	0	0	0	0	0	0	0	0	0
PG 32:0	PG	C38H79N1O10P1	+NH4+	740.544	32	0	0	QQQ+ SRM NL189	PG 40:0	% of total PG	%		0	0	0	0	0	0	0	0	0	0	0	0	0	0	0	0	0	0	0	0	0	0	0	0	0	0	0	0	0	0	0	0	0	0	0	0
PG 32:1	PG	C38H77N1O10P1	+NH4+	738.528	32	1	0	QQQ+ SRM NL189	PG 40:0	% of total PG	%		0	0	0	0	0	0	0	0	0	0	0	0	0	0	0	0	0	0	0	0	0	4.21799	3.97179	5.05692	0	0	0	0	0	0	0	0	0	0	0	0
PG 32:2	PG	C38H75N1O10P1	+NH4+	736.512	32	2	0	QQQ+ SRM NL189	PG 40:0	% of total PG	%		0	0	0	0	0	0	0	0	0	0	0	0	0	0	0	0	0	0	0	0	0	0	0	0	0	0	0	0	0	0	0	0	0	0	0	0
PG 34:1	PG	C40H81N1O10P1	+NH4+	766.559	34	1	0	QQQ+ SRM NL189	PG 40:0	% of total PG	%		52.5969	50.4178	56.4238	51.1891	51.5075	49.4535	48.1757	50.1818	51.9355	42.9883	46.5902	44.9929	39.9102	42.7594	44.2538	38.009	44.9805	46.556	46.1808	34.3382	46.7837	27.3769	24.7088	25.1906	39.5598	38.7342	37.8415	42.4294	35.6391	49.1825	43.0576	39.3902	42.7105	41.2545	38.0395	35.1795
PG 34:2	PG	C40H79N1O10P1	+NH4+	764.544	34	2	0	QQQ+ SRM NL189	PG 40:0	% of total PG	%		0	0	0	0	0	0	0	0	0	0	0	0	0	0	0	0	0	0	0	0	0	7.81799	9.64935	11.0997	0	0	0	0	0	0	0	0	0	0	0	0
PG 36:1	PG	C42H85N1O10P1	+NH4+	794.591	36	1	0	QQQ+ SRM NL189	PG 40:0	% of total PG	%		47.4031	49.5822	43.5762	48.8109	48.4925	50.5465	51.8243	49.8182	48.0645	57.0117	53.4098	55.0071	46.3935	44.429	42.4643	43.4929	39.5077	39.5265	53.8192	41.9275	53.2163	34.1491	33.9318	31.4657	40.1018	42.2095	41.753	57.5706	42.5113	50.8175	43.2925	45.2547	39.2011	38.7776	41.7034	40.4554
PG 36:2	PG	C42H83N1O10P1	+NH4+	792.575	36	2	0	QQQ+ SRM NL189	PG 40:0	% of total PG	%		0	0	0	0	0	0	0	0	0	0	0	0	13.6963	12.8117	13.282	18.4981	15.5118	13.9176	0	23.7343	0	18.7763	20.1461	19.4282	20.3384	19.0563	20.4055	0	21.8496	0	13.6499	15.3551	18.0884	19.9678	20.2571	24.3651
PG 36:3	PG	C42H81N1O10P1	+NH4+	790.559	36	3	0	QQQ+ SRM NL189	PG 40:0	% of total PG	%		0	0	0	0	0	0	0	0	0	0	0	0	0	0	0	0	0	0	0	0	0	4.42713	4.17285	4.20256	0	0	0	0	0	0	0	0	0	0	0	0
PG 38:4	PG	C44H83N1O10P1	+NH4+	816.575	38	4	0	QQQ+ SRM NL189	PG 40:0	% of total PG	%		0	0	0	0	0	0	0	0	0	0	0	0	0	0	0	0	0	0	0	0	0	3.23465	3.41938	3.55632	0	0	0	0	0	0	0	0	0	0	0	0
Sum C30	PG		+NH4+					QQQ+ SRM NL189	PG 40:0	% of total PG	%		0	0	0	0	0	0	0	0	0	0	0	0	0	0	0	0	0	0	0	0	0	0	0	0	0	0	0	0	0	0	0	0	0	0	0	0
Sum C32	PG		+NH4+					QQQ+ SRM NL189	PG 40:0	% of total PG	%		0	0	0	0	0	0	0	0	0	0	0	0	0	0	0	0	0	0	0	0	0	4.21799	3.97179	5.05692	0	0	0	0	0	0	0	0	0	0	0	0
Sum C34	PG		+NH4+					QQQ+ SRM NL189	PG 40:0	% of total PG	%		52.5969	50.4178	56.4238	51.1891	51.5075	49.4535	48.1757	50.1818	51.9355	42.9883	46.5902	44.9929	39.9102	42.7594	44.2538	38.009	44.9805	46.556	46.1808	34.3382	46.7837	35.1949	34.3581	36.2903	39.5598	38.7342	37.8415	42.4294	35.6391	49.1825	43.0576	39.3902	42.7105	41.2545	38.0395	35.1795
Sum C36	PG		+NH4+					QQQ+ SRM NL189	PG 40:0	% of total PG	%		47.4031	49.5822	43.5762	48.8109	48.4925	50.5465	51.8243	49.8182	48.0645	57.0117	53.4098	55.0071	60.0898	57.2406	55.7462	61.991	55.0195	53.444	53.8192	65.6618	53.2163	57.3525	58.2507	55.0965	60.4402	61.2658	62.1585	57.5706	64.3609	50.8175	56.9424	60.6098	57.2895	58.7455	61.9605	64.8205
Sum C38	PG		+NH4+					QQQ+ SRM NL189	PG 40:0	% of total PG	%		0	0	0	0	0	0	0	0	0	0	0	0	0	0	0	0	0	0	0	0	0	3.23465	3.41938	3.55632	0	0	0	0	0	0	0	0	0	0	0	0
Sum DB0	PG		+NH4+					QQQ+ SRM NL189	PG 40:0	% of total PG	%		0	0	0	0	0	0	0	0	0	0	0	0	0	0	0	0	0	0	0	0	0	0	0	0	0	0	0	0	0	0	0	0	0	0	0	0
Sum DB1	PG		+NH4+					QQQ+ SRM NL189	PG 40:0	% of total PG	%		100	100	100	100	100	100	100	100	100	100	100	100	86.3037	87.1883	86.718	81.5019	84.4882	86.0824	100	76.2657	100	65.744	62.6124	61.7132	79.6616	80.9437	79.5945	100	78.1504	100	86.3501	84.6449	81.9116	80.0322	79.7429	75.6349
Sum DB2	PG		+NH4+					QQQ+ SRM NL189	PG 40:0	% of total PG	%		0	0	0	0	0	0	0	0	0	0	0	0	13.6963	12.8117	13.282	18.4981	15.5118	13.9176	0	23.7343	0	26.5943	29.7954	30.5279	20.3384	19.0563	20.4055	0	21.8496	0	13.6499	15.3551	18.0884	19.9678	20.2571	24.3651
Sum DB3	PG		+NH4+					QQQ+ SRM NL189	PG 40:0	% of total PG	%		0	0	0	0	0	0	0	0	0	0	0	0	0	0	0	0	0	0	0	0	0	4.42713	4.17285	4.20256	0	0	0	0	0	0	0	0	0	0	0	0
Sum DB4	PG		+NH4+					QQQ+ SRM NL189	PG 40:0	% of total PG	%		0	0	0	0	0	0	0	0	0	0	0	0	0	0	0	0	0	0	0	0	0	3.23465	3.41938	3.55632	0	0	0	0	0	0	0	0	0	0	0	0
Sum Total	PG		+NH4+					QQQ+ SRM NL189	PG 40:0	% of total PG	%		100	100	100	100	100	100	100	100	100	100	100	100	100	100	100	100	100	100	100	100	100	100	100	100	100	100	100	100	100	100	100	100	100	100	100	100
PI 32:0	PI	C41H83N1O13P1	+NH4+	828.56	32	0	0	QQQ+ SRM NL277	PI 34:0	Concentration	nmol/mg protein	0.00195264	0.0168007	0.00770018	0.0150207	0.0107736	0	0.0230411	0.0114434	0.0140338	0.012431	0	0.0042526	0.00776515	0.0126677	0.0262616	0.0171969	0.00617498	0.0116648	0.0257293	0.00721626	0.00608315	0.000906707	0.0323282	0.0124298	0.0027737	0	0.0234686	0.0139227	0.00240659	0.0352098	0.01266	0.0267009	0.0269835	0.021285	0.0181779	0.0200946	0.0132868
PI 34:1	PI	C43H85N1O13P1	+NH4+	854.575	34	1	0	QQQ+ SRM NL277	PI 34:0	Concentration	nmol/mg protein	0	0.664504	0.581785	0.553662	0.342245	0.330243	0.188527	0.464064	0.443839	0.664576	0.301072	0.628743	0.271133	0.802059	0.864378	0.563498	0.474422	0.516471	0.568765	0.615457	0.422746	0.246813	0.666888	0.591502	0.484564	0.457623	0.90377	0.520301	0.547047	0.846603	0.515496	0.767036	0.663928	0.548236	0.700594	0.491951	0.400201
PI 34:2	PI	C43H83N1O13P1	+NH4+	852.56	34	2	0	QQQ+ SRM NL277	PI 34:0	Concentration	nmol/mg protein	0	0.267605	0.192149	0.230882	0.221375	0.192797	0.172146	0.217819	0.223643	0.31732	0.0786474	0.205759	0.0855922	0.417334	0.529205	0.298064	0.214468	0.195075	0.239514	0.255658	0.131963	0.0802467	0.255199	0.255472	0.210355	0.173919	0.339847	0.195491	0.131903	0.273728	0.121878	0.331451	0.270296	0.178376	0.19511	0.171302	0.0870498
PI 34:3	PI	C43H81N1O13P1	+NH4+	850.544	34	3	0	QQQ+ SRM NL277	PI 34:0	Concentration	nmol/mg protein	0	0.0301097	0.0270712	0.0211299	0.0227533	0.0304516	0.0265845	0.0315318	0.0538032	0.0487722	0.0162052	0.0222305	0.0191699	0.0537129	0.0405386	0.0202037	0.0205687	0.0263811	0.0257192	0.0468356	0.0236933	0.0190851	0.0395297	0.0298819	0.023661	0.0260005	0.0409212	0.0279011	0.0443861	0.0434891	0.0335304	0.0393167	0.027327	0.028525	0.0616805	0.057365	0.0413961
PI 36:0	PI	C45H91N1O13P1	+NH4+	884.622	36	0	0	QQQ+ SRM NL277	PI 34:0	Concentration	nmol/mg protein	0	0	0	0	0	0	0	0	0	0	0	0	0	0	0	0	0	0	0	0	0	0	0	0	0	0	0	0	0	0	0	0	0	0	0	0.00801655	0.0223458
PI 36:1	PI	C45H89N1O13P1	+NH4+	882.607	36	1	0	QQQ+ SRM NL277	PI 34:0	Concentration	nmol/mg protein	0	1.37226	1.3031	1.44244	0.802629	0.826937	0.615974	1.02021	1.01292	1.43763	0.917319	1.90363	1.27319	1.61578	1.72845	1.27011	1.42314	1.4371	1.4896	2.03333	1.43149	1.13446	1.65182	1.62918	1.38727	1.47693	2.5123	1.75451	1.54275	2.23307	1.36367	1.75164	1.60545	1.48143	1.74983	1.36796	1.18774
PI 36:2	PI	C45H87N1O13P1	+NH4+	880.591	36	2	0	QQQ+ SRM NL277	PI 34:0	Concentration	nmol/mg protein	0	1.4578	1.02367	1.25781	0.995875	0.964199	0.79584	0.92452	0.82482	1.35862	0.506165	1.31372	0.735978	2.66609	3.0686	2.1694	1.51409	1.61412	1.56721	1.40131	0.944387	0.787068	2.57208	2.20963	1.9505	1.55635	2.79659	1.75352	1.03862	1.59432	1.00074	2.54848	2.1082	1.72979	1.50253	1.29641	0.995239
PI 36:3	PI	C45H85N1O13P1	+NH4+	878.575	36	3	0	QQQ+ SRM NL277	PI 34:0	Concentration	nmol/mg protein	0	0.240213	0.189619	0.257684	0.27381	0.241158	0.181403	0.196992	0.213496	0.296072	0.0329957	0.213798	0.025617	0.981901	1.1552	0.867159	0.336071	0.446592	0.475647	0.117017	0.0741515	0.0662117	0.885188	0.741067	0.659374	0.308433	0.563065	0.414793	0.0496212	0.145593	0.0517205	0.815522	0.709688	0.462501	0.306907	0.258827	0.217016
PI 36:4	PI	C45H83N1O13P1	+NH4+	876.56	36	4	0	QQQ+ SRM NL277	PI 34:0	Concentration	nmol/mg protein	0	0.268497	0.213935	0.233796	0.256531	0.287768	0.207274	0.161188	0.163695	0.238656	0.0603406	0.130795	0.112355	0.333024	0.340977	0.240543	0.123883	0.128706	0.128006	0.177183	0.112336	0.108385	0.293506	0.227467	0.214658	0.0843967	0.17834	0.125918	0.12935	0.177877	0.141	0.218123	0.157856	0.181061	0.179478	0.0844874	0.0802769
PI 38:2	PI	C47H91N1O13P1	+NH4+	908.622	38	2	0	QQQ+ SRM NL277	PI 34:0	Concentration	nmol/mg protein	0	0.293286	0.210227	0.282784	0.263276	0.220896	0.179351	0.246409	0.140734	0.299667	0.180975	0.334264	0.181308	1.56424	1.78178	1.41645	1.06929	1.02142	1.21232	0.167649	0.172177	0.147783	1.08532	0.975207	0.961904	0.903218	1.47792	1.0389	0.210188	0.243994	0.219074	1.35638	1.26155	0.964018	0.398394	0.458033	0.316069
PI 38:3	PI	C47H89N1O13P1	+NH4+	906.607	38	3	0	QQQ+ SRM NL277	PI 34:0	Concentration	nmol/mg protein	0	3.37664	2.62863	3.14875	3.07824	3.16327	2.68876	3.0165	2.53311	3.96172	2.03957	3.8648	2.41318	10.7497	12.1879	8.78474	6.80073	7.07388	7.03349	3.42042	2.34837	2.0994	13.3519	11.8348	10.4281	7.10763	11.9358	8.30991	2.23007	2.88043	1.86684	10.8724	10.1108	8.16874	5.83568	4.37543	4.19128
PI 38:4	PI	C47H87N1O13P1	+NH4+	904.591	38	4	0	QQQ+ SRM NL277	PI 34:0	Concentration	nmol/mg protein	0	8.39531	7.16656	7.81222	7.42209	8.03846	6.19265	4.77499	4.20227	6.73585	4.39349	8.63254	5.48211	7.38143	8.16385	6.17941	5.86602	5.94203	5.44899	11.4074	7.96707	6.81055	8.85219	8.30222	7.30558	5.38391	9.00713	5.84282	7.89962	11.0591	7.84501	5.83685	5.26792	4.96867	7.40467	5.51412	5.48669
PI 38:5	PI	C47H85N1O13P1	+NH4+	902.575	38	5	0	QQQ+ SRM NL277	PI 34:0	Concentration	nmol/mg protein	0	1.62199	1.28201	1.39838	1.41394	1.49014	1.17071	0.919295	0.801404	1.21909	0.564002	1.07053	0.600987	1.12428	1.23842	0.887615	0.77981	0.773384	0.77838	1.36114	0.920781	0.819192	1.13177	1.09819	0.896874	0.717765	1.24258	0.824472	1.06309	1.47436	1.0618	0.830244	0.669162	0.664609	1.12287	0.881198	0.80979
PI 38:6	PI	C47H83N1O13P1	+NH4+	900.56	38	6	0	QQQ+ SRM NL277	PI 34:0	Concentration	nmol/mg protein	0	0.0964025	0.0706917	0.0680364	0.071912	0.086242	0.0771265	0.0470719	0.0421709	0.0657157	0.00190827	0.036197	0.0255686	0.0968107	0.08985	0.0552474	0.0210637	0.0618885	0.0594221	0.0729256	0.0427502	0.0344826	0.04685	0.0533382	0.0279044	0.0356783	0.0722191	0.0362133	0.045609	0.0850618	0.0472899	0.0544786	0.0481146	0.0524335	0.065831	0.0307927	0.0416346
PI 40:3	PI	C49H93N1O13P1	+NH4+	934.638	40	3	0	QQQ+ SRM NL277	PI 34:0	Concentration	nmol/mg protein	0	0.133236	0.106859	0.127804	0.139349	0.11952	0.110228	0.116388	0.114175	0.149516	0.105768	0.238698	0.130807	0.633223	0.666386	0.511035	0.454845	0.460684	0.474409	0.197031	0.21312	0.14653	0.746705	0.646284	0.578105	0.766057	1.14066	0.753903	0.150445	0.273289	0.169771	0.860054	0.789662	0.629516	0.576885	0.425175	0.413332
PI 40:4	PI	C49H91N1O13P1	+NH4+	932.622	40	4	0	QQQ+ SRM NL277	PI 34:0	Concentration	nmol/mg protein	0	0.261644	0.252484	0.230944	0.250616	0.238758	0.21145	0.23048	0.16414	0.266391	0.238222	0.336695	0.202749	0.595155	0.703713	0.450065	0.423214	0.387917	0.401259	0.566108	0.318586	0.301913	0.642216	0.6254	0.435867	0.558879	0.874466	0.598815	0.377768	0.493622	0.334241	0.586085	0.510269	0.440801	0.47847	0.380244	0.377938
PI 40:5	PI	C49H89N1O13P1	+NH4+	930.607	40	5	0	QQQ+ SRM NL277	PI 34:0	Concentration	nmol/mg protein	0	0.582858	0.517983	0.568348	0.476818	0.571257	0.431141	0.356897	0.294002	0.461165	0.304345	0.610488	0.410142	0.491949	0.585072	0.411192	0.525485	0.515244	0.452722	0.692646	0.523869	0.422485	0.767665	0.716189	0.666238	0.627182	0.914565	0.62499	0.53591	0.613422	0.528507	0.617666	0.593562	0.571719	0.637551	0.554376	0.454247
PI 40:6	PI	C49H87N1O13P1	+NH4+	928.591	40	6	0	QQQ+ SRM NL277	PI 34:0	Concentration	nmol/mg protein	0	0.665163	0.566371	0.608993	0.500123	0.549513	0.486093	0.436013	0.381813	0.562965	0.356076	0.78605	0.435931	0.443069	0.480808	0.375968	0.446138	0.550417	0.408678	0.91214	0.593687	0.503271	0.618606	0.616142	0.481471	0.467267	0.865491	0.560391	0.544915	0.89574	0.513092	0.489755	0.396875	0.424168	0.670593	0.50212	0.498487
Sum C32	PI		+NH4+					QQQ+ SRM NL277	PI 34:0	Concentration	nmol/mg protein	0.00195264	0.0168007	0.00770018	0.0150207	0.0107736		0.0230411	0.0114434	0.0140338	0.012431		0.0042526	0.00776515	0.0126677	0.0262616	0.0171969	0.00617498	0.0116648	0.0257293	0.00721626	0.00608315	0.000906707	0.0323282	0.0124298	0.0027737		0.0234686	0.0139227	0.00240659	0.0352098	0.01266	0.0267009	0.0269835	0.021285	0.0181779	0.0200946	0.0132868
Sum C34	PI		+NH4+					QQQ+ SRM NL277	PI 34:0	Concentration	nmol/mg protein		0.962218	0.801005	0.805675	0.586373	0.553492	0.387258	0.713415	0.721285	1.03067	0.395925	0.856733	0.375895	1.27311	1.43412	0.881765	0.709459	0.737927	0.833999	0.917951	0.578402	0.346145	0.961616	0.876856	0.71858	0.657542	1.28454	0.743693	0.723336	1.16382	0.670905	1.1378	0.961551	0.755136	0.957384	0.720618	0.528647
Sum C36	PI		+NH4+					QQQ+ SRM NL277	PI 34:0	Concentration	nmol/mg protein		3.33877	2.73032	3.19173	2.32885	2.32006	1.80049	2.30291	2.21493	3.33098	1.51682	3.56195	2.14714	5.5968	6.29323	4.54721	3.39718	3.62652	3.66046	3.72884	2.56237	2.09613	5.40259	4.80735	4.2118	3.42611	6.05029	4.04875	2.76034	4.15086	2.55712	5.33377	4.5812	3.85479	3.73874	3.01571	2.50261
Sum C38	PI		+NH4+					QQQ+ SRM NL277	PI 34:0	Concentration	nmol/mg protein		13.7836	11.3581	12.7102	12.2495	12.999	10.3086	9.00427	7.71969	12.282	7.17994	13.9383	8.70315	20.9164	23.4618	17.3235	14.5369	14.8726	14.5326	16.4296	11.4511	9.9114	24.468	22.2638	19.6203	14.1482	23.7356	16.0523	11.4486	15.743	11.04	18.9503	17.3575	14.8185	14.8275	11.2596	10.8455
Sum C40	PI		+NH4+					QQQ+ SRM NL277	PI 34:0	Concentration	nmol/mg protein		1.6429	1.4437	1.53609	1.36691	1.47905	1.23891	1.13978	0.95413	1.44004	1.00441	1.97193	1.17963	2.1634	2.43598	1.74826	1.84968	1.91426	1.73707	2.36792	1.64926	1.3742	2.77519	2.60402	2.16168	2.41938	3.79519	2.5381	1.60904	2.27607	1.54561	2.55356	2.29037	2.0662	2.3635	1.86191	1.74401
Sum DB0	PI		+NH4+					QQQ+ SRM NL277	PI 34:0	Concentration	nmol/mg protein	0.00195264	0.0168007	0.00770018	0.0150207	0.0107736		0.0230411	0.0114434	0.0140338	0.012431		0.0042526	0.00776515	0.0126677	0.0262616	0.0171969	0.00617498	0.0116648	0.0257293	0.00721626	0.00608315	0.000906707	0.0323282	0.0124298	0.0027737		0.0234686	0.0139227	0.00240659	0.0352098	0.01266	0.0267009	0.0269835	0.021285	0.0181779	0.0281111	0.0356326
Sum DB1	PI		+NH4+					QQQ+ SRM NL277	PI 34:0	Concentration	nmol/mg protein		2.03676	1.88488	1.9961	1.14487	1.15718	0.804501	1.48428	1.45676	2.1022	1.21839	2.53238	1.54432	2.41784	2.59283	1.8336	1.89756	1.95357	2.05837	2.64879	1.85424	1.38127	2.3187	2.22068	1.87183	1.93455	3.41607	2.27481	2.08979	3.07967	1.87916	2.51868	2.26938	2.02966	2.45043	1.85992	1.58794
Sum DB2	PI		+NH4+					QQQ+ SRM NL277	PI 34:0	Concentration	nmol/mg protein		2.01869	1.42604	1.77148	1.48053	1.37789	1.14734	1.38875	1.1892	1.97561	0.765787	1.85375	1.00288	4.64766	5.37958	3.88392	2.79784	2.83061	3.01904	1.82461	1.24853	1.0151	3.9126	3.44031	3.12276	2.63349	4.61436	2.98792	1.38071	2.11204	1.34169	4.23631	3.64005	2.87219	2.09603	1.92575	1.39836
Sum DB3	PI		+NH4+					QQQ+ SRM NL277	PI 34:0	Concentration	nmol/mg protein		3.78019	2.95218	3.55537	3.51415	3.5544	3.00697	3.36141	2.91458	4.45608	2.19454	4.33953	2.58877	12.4185	14.05	10.1831	7.61222	8.00754	8.00926	3.7813	2.65933	2.33122	15.0233	13.2521	11.6892	8.20812	13.6804	9.50651	2.47452	3.3428	2.12186	12.5873	11.6375	9.28928	6.78116	5.1168	4.86303
Sum DB4	PI		+NH4+					QQQ+ SRM NL277	PI 34:0	Concentration	nmol/mg protein		8.92546	7.63298	8.27697	7.92924	8.56498	6.61137	5.16666	4.5301	7.2409	4.69205	9.10003	5.79722	8.30961	9.20854	6.87002	6.41311	6.45866	5.97825	12.1507	8.39799	7.22084	9.78791	9.15509	7.9561	6.02719	10.0599	6.56755	8.40674	11.7306	8.32025	6.64105	5.93604	5.59053	8.06262	5.97885	5.94491
Sum DB5	PI		+NH4+					QQQ+ SRM NL277	PI 34:0	Concentration	nmol/mg protein		2.20485	1.8	1.96673	1.89075	2.0614	1.60185	1.27619	1.09541	1.68025	0.868347	1.68102	1.01113	1.61622	1.82349	1.29881	1.3053	1.28863	1.2311	2.05379	1.44465	1.24168	1.89943	1.81438	1.56311	1.34495	2.15714	1.44946	1.599	2.08778	1.59031	1.44791	1.26272	1.23633	1.76042	1.43557	1.26404
Sum DB6	PI		+NH4+					QQQ+ SRM NL277	PI 34:0	Concentration	nmol/mg protein		0.761566	0.637062	0.677029	0.572035	0.635755	0.563219	0.483085	0.423984	0.62868	0.357984	0.822247	0.461499	0.53988	0.570658	0.431215	0.467202	0.612305	0.4681	0.985066	0.636437	0.537753	0.665456	0.66948	0.509376	0.502945	0.93771	0.596604	0.590524	0.980801	0.560382	0.544234	0.444989	0.476602	0.736424	0.532913	0.540122
Sum Total	PI		+NH4+					QQQ+ SRM NL277	PI 34:0	Concentration	nmol/mg protein	0.00195264	19.7443	16.3408	18.2587	16.5424	17.3516	13.7583	13.1718	11.6241	18.0962	10.0971	20.3332	12.4136	29.9624	33.6514	24.5179	20.4994	21.163	20.7899	23.4515	16.2473	13.7288	33.6398	30.5644	26.7152	20.6512	34.8891	23.3968	16.5437	23.3689	15.8263	28.0022	25.2176	21.5159	21.9053	16.8779	15.634
PI 32:0	PI	C41H83N1O13P1	+NH4+	828.56	32	0	0	QQQ+ SRM NL277	PI 34:0	% of total PI	%	100	0.0850913	0.0471223	0.0822662	0.0651273	0	0.167471	0.0868783	0.120731	0.0686943	0	0.0209146	0.0625537	0.0422787	0.0780402	0.0701404	0.0301227	0.0551187	0.123759	0.030771	0.0374411	0.00660443	0.0961012	0.0406675	0.0103825	0	0.0672663	0.0595071	0.0145469	0.150669	0.0799931	0.0953532	0.107002	0.0989269	0.0829843	0.119058	0.0849866
PI 34:1	PI	C43H85N1O13P1	+NH4+	854.575	34	1	0	QQQ+ SRM NL277	PI 34:0	% of total PI	%	0	3.36554	3.56031	3.03232	2.0689	1.90324	1.37028	3.52316	3.81827	3.67247	2.98177	3.0922	2.18416	2.67689	2.56862	2.29831	2.31432	2.44045	2.73578	2.62438	2.60195	1.79778	1.98244	1.93526	1.81382	2.21596	2.59041	2.22381	3.30668	3.62277	3.25721	2.7392	2.63279	2.54805	3.19829	2.91476	2.55981
PI 34:2	PI	C43H83N1O13P1	+NH4+	852.56	34	2	0	QQQ+ SRM NL277	PI 34:0	% of total PI	%	0	1.35535	1.17588	1.26451	1.33823	1.11112	1.25121	1.65367	1.92397	1.75352	0.778911	1.01194	0.689504	1.39286	1.57261	1.2157	1.04622	0.921775	1.15207	1.09016	0.812216	0.584515	0.758621	0.835848	0.7874	0.842172	0.974079	0.835547	0.797302	1.17133	0.770098	1.18366	1.07185	0.829042	0.890701	1.01495	0.556797
PI 34:3	PI	C43H81N1O13P1	+NH4+	850.544	34	3	0	QQQ+ SRM NL277	PI 34:0	% of total PI	%	0	0.152498	0.165666	0.115725	0.137546	0.175497	0.193225	0.239389	0.46286	0.269517	0.160494	0.109331	0.154427	0.179268	0.120466	0.0824038	0.100338	0.124657	0.12371	0.199713	0.145829	0.139015	0.117509	0.0977669	0.0885677	0.125903	0.117289	0.119252	0.268296	0.186098	0.211865	0.140406	0.108365	0.132577	0.281579	0.339882	0.264782
PI 36:0	PI	C45H91N1O13P1	+NH4+	884.622	36	0	0	QQQ+ SRM NL277	PI 34:0	% of total PI	%	0	0	0	0	0	0	0	0	0	0	0	0	0	0	0	0	0	0	0	0	0	0	0	0	0	0	0	0	0	0	0	0	0	0	0	0.0474973	0.142931
PI 36:1	PI	C45H89N1O13P1	+NH4+	882.607	36	1	0	QQQ+ SRM NL277	PI 34:0	% of total PI	%	0	6.95015	7.97447	7.90001	4.85197	4.76576	4.47711	7.74541	8.71397	7.94439	9.08498	9.3622	10.2564	5.39269	5.13635	5.18032	6.94235	6.79064	7.16504	8.67038	8.81066	8.26338	4.91031	5.33032	5.1928	7.15177	7.20081	7.49895	9.32529	9.55573	8.61645	6.25539	6.36639	6.88528	7.98818	8.10506	7.59713
PI 36:2	PI	C45H87N1O13P1	+NH4+	880.591	36	2	0	QQQ+ SRM NL277	PI 34:0	% of total PI	%	0	7.3834	6.26448	6.88883	6.02016	5.55683	5.78444	7.01893	7.09579	7.5078	5.01297	6.46097	5.92882	8.89813	9.11878	8.84824	7.38601	7.62709	7.53832	5.97534	5.81259	5.73298	7.64594	7.22942	7.3011	7.53637	8.01566	7.49472	6.27804	6.82239	6.32325	9.10101	8.36004	8.03962	6.8592	7.68112	6.36586
PI 36:3	PI	C45H85N1O13P1	+NH4+	878.575	36	3	0	QQQ+ SRM NL277	PI 34:0	% of total PI	%	0	1.21662	1.1604	1.4113	1.65521	1.38983	1.3185	1.49556	1.83667	1.6361	0.326784	1.05147	0.206362	3.27711	3.43284	3.53684	1.63942	2.11025	2.28788	0.498974	0.456394	0.482284	2.63137	2.4246	2.46816	1.49353	1.61387	1.77286	0.299941	0.623019	0.3268	2.91235	2.81425	2.14958	1.40107	1.53353	1.3881
PI 36:4	PI	C45H83N1O13P1	+NH4+	876.56	36	4	0	QQQ+ SRM NL277	PI 34:0	% of total PI	%	0	1.35987	1.3092	1.28046	1.55075	1.65845	1.50654	1.22374	1.40824	1.31882	0.597603	0.643257	0.9051	1.11147	1.01326	0.981089	0.604323	0.608165	0.615712	0.755529	0.691416	0.78947	0.872498	0.744222	0.803508	0.408676	0.511162	0.538187	0.781867	0.76117	0.89092	0.778952	0.625976	0.841525	0.819338	0.50058	0.513476
PI 38:2	PI	C47H91N1O13P1	+NH4+	908.622	38	2	0	QQQ+ SRM NL277	PI 34:0	% of total PI	%	0	1.48542	1.28651	1.54876	1.59153	1.27306	1.30358	1.87073	1.21071	1.65597	1.79235	1.64393	1.46056	5.22067	5.29481	5.77722	5.21619	4.82644	5.83131	0.714875	1.05973	1.07645	3.22631	3.19066	3.60059	4.37367	4.23605	4.44037	1.2705	1.0441	1.38424	4.84383	5.00265	4.4805	1.81871	2.7138	2.02167
PI 38:3	PI	C47H89N1O13P1	+NH4+	906.607	38	3	0	QQQ+ SRM NL277	PI 34:0	% of total PI	%	0	17.1018	16.0863	17.2452	18.6082	18.2304	19.5428	22.9012	21.7919	21.8926	20.1996	19.0073	19.4398	35.8772	36.2182	35.8299	33.1753	33.4257	33.8313	14.5851	14.4539	15.2919	39.6909	38.7209	39.0343	34.4175	34.2106	35.5173	13.4799	12.3259	11.7958	38.8269	40.0941	37.9661	26.6406	25.924	26.8087
PI 38:4	PI	C47H87N1O13P1	+NH4+	904.591	38	4	0	QQQ+ SRM NL277	PI 34:0	% of total PI	%	0	42.5201	43.8567	42.7863	44.8672	46.3268	45.0103	36.2516	36.1515	37.2225	43.5124	42.4554	44.1622	24.6357	24.2601	25.2037	28.6155	28.0775	26.2098	48.6427	49.0364	49.6078	26.3146	27.163	27.3462	26.0706	25.8165	24.9727	47.75	47.324	49.5694	20.8443	20.8898	23.093	33.8032	32.6706	35.0946
PI 38:5	PI	C47H85N1O13P1	+NH4+	902.575	38	5	0	QQQ+ SRM NL277	PI 34:0	% of total PI	%	0	8.21497	7.84545	7.65872	8.54738	8.58793	8.50911	6.97926	6.89435	6.73673	5.58578	5.26495	4.84137	3.75229	3.68014	3.62027	3.80406	3.65442	3.74404	5.80407	5.6673	5.96697	3.36437	3.59303	3.35717	3.47565	3.56151	3.52387	6.42596	6.30908	6.70908	2.96493	2.65355	3.08893	5.12603	5.22102	5.17967
PI 38:6	PI	C47H83N1O13P1	+NH4+	900.56	38	6	0	QQQ+ SRM NL277	PI 34:0	% of total PI	%	0	0.488254	0.432607	0.372625	0.434714	0.497026	0.560582	0.357369	0.362789	0.363147	0.0188992	0.178019	0.205972	0.323108	0.267002	0.225335	0.102753	0.292437	0.285823	0.310964	0.263123	0.25117	0.13927	0.174511	0.104451	0.172766	0.206996	0.154779	0.275688	0.363996	0.298806	0.194551	0.190798	0.243697	0.300526	0.182444	0.266307
PI 40:3	PI	C49H93N1O13P1	+NH4+	934.638	40	3	0	QQQ+ SRM NL277	PI 34:0	% of total PI	%	0	0.674806	0.653941	0.699961	0.84238	0.688811	0.801175	0.88361	0.982232	0.826233	1.0475	1.17393	1.05374	2.11339	1.98026	2.08434	2.21882	2.17684	2.28192	0.840162	1.31173	1.06732	2.21971	2.1145	2.16396	3.7095	3.2694	3.22225	0.909378	1.16946	1.07271	3.07138	3.13139	2.92582	2.63355	2.51912	2.6438
PI 40:4	PI	C49H91N1O13P1	+NH4+	932.622	40	4	0	QQQ+ SRM NL277	PI 34:0	% of total PI	%	0	1.32516	1.54511	1.26485	1.515	1.376	1.53689	1.7498	1.41207	1.47209	2.35931	1.65589	1.63328	1.98634	2.09118	1.83566	2.06452	1.833	1.93007	2.41395	1.96086	2.19912	1.9091	2.04617	1.63153	2.70627	2.50642	2.55939	2.28346	2.1123	2.11193	2.093	2.02346	2.04872	2.18427	2.25291	2.41741
PI 40:5	PI	C49H89N1O13P1	+NH4+	930.607	40	5	0	QQQ+ SRM NL277	PI 34:0	% of total PI	%	0	2.95203	3.16987	3.11275	2.88241	3.29224	3.13368	2.70955	2.52925	2.54841	3.01418	3.00242	3.30398	1.64189	1.73863	1.67711	2.56342	2.43465	2.17761	2.95353	3.22436	3.07737	2.28202	2.34321	2.49386	3.03702	2.62135	2.67127	3.23936	2.62495	3.33942	2.20578	2.35376	2.65719	2.91049	3.28463	2.90551
PI 40:6	PI	C49H87N1O13P1	+NH4+	928.591	40	6	0	QQQ+ SRM NL277	PI 34:0	% of total PI	%	0	3.36888	3.46598	3.33536	3.02329	3.16693	3.53309	3.3102	3.28468	3.11096	3.52652	3.86585	3.51172	1.47875	1.42879	1.53344	2.17635	2.60085	1.96576	3.88948	3.65407	3.66581	1.83891	2.01588	1.80224	2.26266	2.48069	2.39516	3.2938	3.83304	3.24202	1.74899	1.5738	1.97142	3.06133	2.97501	3.18848
Sum C32	PI		+NH4+					QQQ+ SRM NL277	PI 34:0	% of total PI	%	100	0.0850913	0.0471223	0.0822662	0.0651273	0	0.167471	0.0868783	0.120731	0.0686943	0	0.0209146	0.0625537	0.0422787	0.0780402	0.0701404	0.0301227	0.0551187	0.123759	0.030771	0.0374411	0.00660443	0.0961012	0.0406675	0.0103825	0	0.0672663	0.0595071	0.0145469	0.150669	0.0799931	0.0953532	0.107002	0.0989269	0.0829843	0.119058	0.0849866
Sum C34	PI		+NH4+					QQQ+ SRM NL277	PI 34:0	% of total PI	%	0	4.87339	4.90186	4.41255	3.54468	3.18986	2.81472	5.41622	6.2051	5.69551	3.92117	4.21347	3.02809	4.24901	4.2617	3.59641	3.46087	3.48688	4.01157	3.91426	3.56	2.52131	2.85857	2.86888	2.68978	3.18403	3.68178	3.17861	4.37228	4.98021	4.23917	4.06327	3.81301	3.50967	4.37057	4.26959	3.38139
Sum C36	PI		+NH4+					QQQ+ SRM NL277	PI 34:0	% of total PI	%	0	16.91	16.7086	17.4806	14.0781	13.3709	13.0866	17.4836	19.0547	18.4071	15.0223	17.5179	17.2967	18.6794	18.7012	18.5465	16.5721	17.1361	17.607	15.9002	15.7711	15.2681	16.0601	15.7286	15.7656	16.5903	17.3415	17.3047	16.6851	17.7623	16.1574	19.0477	18.1667	17.916	17.0678	17.8678	16.0075
Sum C38	PI		+NH4+					QQQ+ SRM NL277	PI 34:0	% of total PI	%	0	69.8106	69.5076	69.6117	74.049	74.9153	74.9264	68.3601	66.4113	67.871	71.109	68.5496	70.1099	69.8089	69.7202	70.6564	70.9138	70.2765	69.9024	70.0576	70.4805	72.1943	72.7355	72.8421	73.4427	68.5102	68.0316	68.6091	69.2021	67.3671	69.7573	67.6745	68.8309	68.8722	67.689	66.7119	69.3709
Sum C40	PI		+NH4+					QQQ+ SRM NL277	PI 34:0	% of total PI	%	0	8.32088	8.83489	8.41292	8.26307	8.52398	9.00483	8.65315	8.20823	7.9577	9.94752	9.69808	9.50273	7.22037	7.23886	7.13054	9.0231	9.04534	8.35536	10.0971	10.151	10.0096	8.24973	8.51976	8.09159	11.7154	10.8779	10.8481	9.72599	9.73974	9.76609	9.11915	9.08241	9.60316	10.7896	11.0317	11.1552
Sum DB0	PI		+NH4+					QQQ+ SRM NL277	PI 34:0	% of total PI	%	100	0.0850913	0.0471223	0.0822662	0.0651273	0	0.167471	0.0868783	0.120731	0.0686943	0	0.0209146	0.0625537	0.0422787	0.0780402	0.0701404	0.0301227	0.0551187	0.123759	0.030771	0.0374411	0.00660443	0.0961012	0.0406675	0.0103825	0	0.0672663	0.0595071	0.0145469	0.150669	0.0799931	0.0953532	0.107002	0.0989269	0.0829843	0.166556	0.227917
Sum DB1	PI		+NH4+					QQQ+ SRM NL277	PI 34:0	% of total PI	%	0	10.3157	11.5348	10.9323	6.92087	6.66901	5.84739	11.2686	12.5322	11.6169	12.0667	12.4544	12.4406	8.06958	7.70498	7.47863	9.25667	9.23109	9.90082	11.2948	11.4126	10.0612	6.89275	7.26558	7.00662	9.36773	9.79122	9.72277	12.632	13.1785	11.8737	8.99459	8.99918	9.43333	11.1865	11.0198	10.1569
Sum DB2	PI		+NH4+					QQQ+ SRM NL277	PI 34:0	% of total PI	%	0	10.2242	8.72687	9.7021	8.94992	7.94101	8.33923	10.5433	10.2305	10.9173	7.58423	9.11684	8.07888	15.5117	15.9862	15.8412	13.6484	13.3753	14.5217	7.78038	7.68454	7.39394	11.6309	11.2559	11.6891	12.7522	13.2258	12.7706	8.34585	9.03782	8.47759	15.1285	14.4345	13.3492	9.56862	11.4099	8.94432
Sum DB3	PI		+NH4+					QQQ+ SRM NL277	PI 34:0	% of total PI	%	0	19.1457	18.0663	19.4722	21.2433	20.4846	21.8557	25.5197	25.0737	24.6245	21.7344	21.3421	20.8543	41.447	41.7517	41.5335	37.1338	37.8375	38.5249	16.1239	16.3679	16.9806	44.6595	43.3578	43.755	39.7464	39.2111	40.6317	14.9575	14.3045	13.4072	44.9511	46.1481	43.1741	30.9568	30.3165	31.1054
Sum DB4	PI		+NH4+					QQQ+ SRM NL277	PI 34:0	% of total PI	%	0	45.2052	46.711	45.3316	47.933	49.3613	48.0537	39.2251	38.9718	40.0134	46.4693	44.7545	46.7006	27.7335	27.3645	28.0204	31.2844	30.5187	28.7556	51.8121	51.6887	52.5964	29.0962	29.9534	29.7812	29.1856	28.834	28.0703	50.8154	50.1975	52.5723	23.7162	23.5393	25.9833	36.8068	35.4241	38.0255
Sum DB5	PI		+NH4+					QQQ+ SRM NL277	PI 34:0	% of total PI	%	0	11.167	11.0153	10.7715	11.4298	11.8802	11.6428	9.68881	9.4236	9.28514	8.59996	8.26737	8.14535	5.39418	5.41876	5.29738	6.36748	6.08907	5.92165	8.7576	8.89166	9.04434	5.64638	5.93624	5.85103	6.51267	6.18286	6.19514	9.66532	8.93403	10.0485	5.17071	5.00731	5.74612	8.03652	8.50564	8.08517
Sum DB6	PI		+NH4+					QQQ+ SRM NL277	PI 34:0	% of total PI	%	0	3.85714	3.89859	3.70798	3.458	3.66395	4.09367	3.66756	3.64747	3.47411	3.54542	4.04386	3.7177	1.80186	1.69579	1.75878	2.2791	2.89328	2.25158	4.20044	3.9172	3.91698	1.97818	2.19039	1.90669	2.43542	2.68769	2.54994	3.56948	4.19703	3.54082	1.94354	1.7646	2.21512	3.36186	3.15746	3.45479
Sum Total	PI		+NH4+					QQQ+ SRM NL277	PI 34:0	% of total PI	%	100	100	100	100	100	100	100	100	100	100	100	100	100	100	100	100	100	100	100	100	100	100	100	100	100	100	100	100	100	100	100	100	100	100	100	100	100
LPC 15:0	LPC	C23H49N1O7P1	+H+	482.324	15	0	0	QQQ+ SRM Q3mz184	LPC 13:0	Concentration	nmol/mg protein	0.000403523	0.0044597	0.00484339	0.00463181	0.0047779	0.00377892	0.00302872	0.00341787	0.00322526	0.00573111	0.00269537	0.00440787	0.00246475	0.00555308	0.0071214	0.00429637	0.00501792	0.0045088	0.00479464	0.00482563	0.00370698	0.0042735	0.00501739	0.00352009	0.00413303	0.00216757	0.00499246	0.00299763	0.00503429	0.00502307	0.00369107	0.00332888	0.00376975	0.00501797	0.00275613	0.00210255	0.00202497
LPC 16:0	LPC	C24H51N1O7P1	+H+	496.34	16	0	0	QQQ+ SRM Q3mz184	LPC 13:0	Concentration	nmol/mg protein	0.000960502	0.134988	0.125206	0.12318	0.102041	0.0962587	0.0769687	0.0681832	0.0658383	0.111677	0.0477033	0.0938544	0.0560418	0.125232	0.1344	0.100732	0.0837168	0.0924712	0.0964099	0.15443	0.130216	0.110795	0.112755	0.0977938	0.0857074	0.0528699	0.122831	0.0900148	0.0913969	0.137403	0.0971947	0.0850815	0.0689592	0.114025	0.0664305	0.0488431	0.0354394
LPC 16:1	LPC	C24H49N1O7P1	+H+	494.324	16	1	0	QQQ+ SRM Q3mz184	LPC 13:0	Concentration	nmol/mg protein	0	0.0285564	0.0236375	0.0270738	0.0299656	0.0253611	0.020836	0.0222139	0.0190823	0.0312466	0.0132503	0.0309278	0.0179957	0.117677	0.129832	0.0843343	0.0561856	0.0560222	0.0615972	0.020756	0.0161253	0.012621	0.0465841	0.0399337	0.0350918	0.0292858	0.0586676	0.0473769	0.0158878	0.0282494	0.0157308	0.0619215	0.0515614	0.148185	0.0272288	0.0188261	0.0140017
LPC 18:0	LPC	C26H55N1O7P1	+H+	524.371	18	0	0	QQQ+ SRM Q3mz184	LPC 13:0	Concentration	nmol/mg protein	0.000124053	0.147805	0.131513	0.132531	0.101593	0.0965221	0.0750713	0.0690282	0.0730092	0.119546	0.0633069	0.113092	0.0742105	0.047383	0.0589214	0.0417242	0.0462785	0.047227	0.0568425	0.218048	0.195248	0.161783	0.0829449	0.0864453	0.0691413	0.03861	0.0735284	0.0453639	0.115066	0.166449	0.133788	0.0582643	0.0515307	0.0592544	0.0545091	0.0392531	0.0317902
LSM 18:1	LPC	C26H53N1O7P1	+H+	522.355	18	1	0	QQQ+ SRM Q3mz184	LPC 13:0	Concentration	nmol/mg protein	5.35609e-05	0.000539549	0	0	0.000502004	0.000397383	0	0.000288073	0	0.000380544	0.000600586	0.000632061	0	0	0.001152	0	0.00120466	0	0.000577639	0.000930156	0.000507293	0	0.00118854	0.000852342	0.0010408	0.000115694	0.000592008	0.000307379	0.000579756	0.000800833	0.000635655	0.00124129	0.000939268	0.00115069	0.000314492	0.000426718	0.000592662
LPC 18:1	LPC	C26H53N1O7P1	+H+	522.355	18	1	0	QQQ+ SRM Q3mz184	LPC 13:0	Concentration	nmol/mg protein	0	0.231597	0.195068	0.214602	0.193822	0.153227	0.146313	0.133144	0.116669	0.202284	0.13476	0.239843	0.16185	0.627773	0.686735	0.501367	0.401149	0.414029	0.410156	0.238509	0.166119	0.129487	0.370281	0.305808	0.261406	0.209563	0.455675	0.356601	0.17498	0.269406	0.169655	0.400475	0.30413	0.942505	0.21371	0.13885	0.108873
LPC 18:2	LPC	C26H51N1O7P1	+H+	520.34	18	2	0	QQQ+ SRM Q3mz184	LPC 13:0	Concentration	nmol/mg protein	0.000410963	0.0133023	0.0140862	0.014646	0.0140306	0.00944243	0.0107686	0.00900635	0.0103695	0.0123706	0.00815985	0.013042	0.00715676	0.0431709	0.049754	0.0354123	0.025777	0.0238879	0.0268996	0.009508	0.00562117	0.0042883	0.0222131	0.0186278	0.0187851	0.0105558	0.0249154	0.0230819	0.00653034	0.0116329	0.0056832	0.0405071	0.0274053	0.0981736	0.0127996	0.00850256	0.00727194
LPC 18:3	LPC	C26H49N1O7P1	+H+	518.324	18	3	0	QQQ+ SRM Q3mz184	LPC 13:0	Concentration	nmol/mg protein	0	0.00146549	0.00207365	0.0023026	0.00282169	0	0.00151865	0.00169703	0.00225811	0	0.00156781	0.00266522	0	0.00421901	0.00456076	0.00255733	0.00380621	0.00207844	0.00301718	0.00430614	0	0	0.00297587	0.00300951	0.00265236	0.00158965	0.00322063	0.0019475	0.00347359	0.00356468	0.00228426	0.00351169	0.00373251	0.0101512	0.00265793	0.00234986	0
LPC 20:0	LPC	C28H59N1O7P1	+H+	552.402	20	0	0	QQQ+ SRM Q3mz184	LPC 13:0	Concentration	nmol/mg protein	0	0.00330938	0.0115938	0.00394006	0.00541053	0.00237383	0.00225411	0.00159233	0.00216011	0.00467091	0.00170582	0.00335842	0.00184655	0.00168069	0.00144565	0.000985757	0.00158683	0.00171294	0.00135369	0.00640834	0.00366141	0.00352892	0.00253278	0.00328371	0.0016023	0.000667914	0.00150339	0.00133697	0.00319426	0.0040579	0.00305819	0.00143721	0.00255011	0.000952974	0.00145038	0.00104109	0.000603132
LPC 20:3	LPC	C28H53N1O7P1	+H+	546.355	20	3	0	QQQ+ SRM Q3mz184	LPC 13:0	Concentration	nmol/mg protein	0	0.016805	0.0168123	0.0179735	0.0140462	0.0123216	0.0125026	0.0126355	0.0112396	0.018723	0.0108482	0.0181223	0.0122811	0.0546279	0.0594112	0.0425892	0.0396655	0.0390861	0.0363821	0.0130643	0.00973587	0.00782451	0.0555074	0.0383537	0.0319554	0.0254127	0.0473695	0.0428852	0.0117859	0.0168015	0.0101372	0.0561639	0.0464931	0.151781	0.0263186	0.0153087	0.0135771
LPC 20:4	LPC	C28H51N1O7P1	+H+	544.34	20	4	0	QQQ+ SRM Q3mz184	LPC 13:0	Concentration	nmol/mg protein	0	0.0325001	0.0257801	0.030766	0.0280053	0.0221923	0.0226444	0.0171493	0.0157877	0.0233195	0.0235056	0.0389171	0.0282895	0.0419636	0.042021	0.0345474	0.0454492	0.0401546	0.0409928	0.0464612	0.0316741	0.025434	0.0509508	0.046004	0.0432654	0.0371706	0.0592117	0.0497168	0.0396647	0.0650399	0.0366518	0.0350683	0.0282662	0.116468	0.049468	0.0335136	0.028921
LPC 20:5	LPC	C28H49N1O7P1	+H+	542.324	20	5	0	QQQ+ SRM Q3mz184	LPC 13:0	Concentration	nmol/mg protein	0.000902542	0.00338077	0.00384707	0.00509433	0.00492653	0.00387341	0.00237281	0.00478396	0.00271215	0.00391134	0.00314722	0.00583626	0.00387546	0.00492468	0.00476083	0.00375897	0.00343769	0.00303644	0.00379364	0.00430651	0.00284257	0.00387527	0.00407314	0.00443969	0.00339049	0.00385452	0.00352037	0.00259774	0.00333398	0.00423073	0.00330916	0.00462727	0.00358352	0.0122494	0.00705518	0.00586913	0.00425674
LPC 22:0	LPC	C30H63N1O7P1	+H+	580.434	22	0	0	QQQ+ SRM Q3mz184	LPC 13:0	Concentration	nmol/mg protein	0.000478882	0.00797897	0.00824378	0.00588482	0.00694167	0.00698845	0.0076335	0.0121698	0.00884594	0.015926	0.00965888	0.0168629	0.00315621	0.001926	0.00455184	0.00124244	0.00184526	0.0022059	0.0212608	0.020611	0.0171732	0.018689	0.0200328	0.0137408	0.00292751	0.000517226	0.00506338	0.00359651	0.00430207	0.00652394	0.00549485	0.00560587	0.00490478	0.00605521	0.00772096	0.00264845	0.00196943
LPC 22:4	LPC	C30H55N1O7P1	+H+	572.371	22	4	0	QQQ+ SRM Q3mz184	LPC 13:0	Concentration	nmol/mg protein	0.000851231	0.00726823	0.00426097	0.00586534	0.00628512	0.00493426	0.00352547	0.00574147	0.00352196	0.007432	0.007999	0.0113605	0.00959724	0.00775379	0.00947585	0.00817334	0.00965483	0.00732924	0.00678655	0.0115264	0.00671364	0.00688059	0.0166792	0.0152448	0.0143512	0.00688721	0.011938	0.00974364	0.0100236	0.0143966	0.0119305	0.0100019	0.0088708	0.0181287	0.0121516	0.0113525	0.009284
LPC 22:5	LPC	C30H53N1O7P1	+H+	570.355	22	5	0	QQQ+ SRM Q3mz184	LPC 13:0	Concentration	nmol/mg protein	0	0.0115874	0.0110855	0.0108394	0.00894978	0.00826719	0.00819697	0.007391	0.00575051	0.00892435	0.00774198	0.0109039	0.00958309	0.0149269	0.0132049	0.0106868	0.013013	0.012095	0.00926857	0.0120967	0.00701575	0.00752863	0.0163083	0.0145657	0.0159786	0.00964438	0.0177633	0.0139011	0.0122706	0.014435	0.00889708	0.0123164	0.00993403	0.0426999	0.0157865	0.00887747	0.00880922
LPC 22:6	LPC	C30H51N1O7P1	+H+	568.34	22	6	0	QQQ+ SRM Q3mz184	LPC 13:0	Concentration	nmol/mg protein	0.000360928	0.0120749	0.00921303	0.00972958	0.0114644	0.00894415	0.00988779	0.00909907	0.00653405	0.0129934	0.00726283	0.0139802	0.00850163	0.0189822	0.0187367	0.0136835	0.0158612	0.0138628	0.0127104	0.0174485	0.0124291	0.00805962	0.0204036	0.0160087	0.0125137	0.0108206	0.0191787	0.0148802	0.0139724	0.0221688	0.0103527	0.00979541	0.00895463	0.0382027	0.0146202	0.0107086	0.00864518
Sum C15	LPC		+H+					QQQ+ SRM Q3mz184	LPC 13:0	Concentration	nmol/mg protein	0.000403523	0.0044597	0.00484339	0.00463181	0.0047779	0.00377892	0.00302872	0.00341787	0.00322526	0.00573111	0.00269537	0.00440787	0.00246475	0.00555308	0.0071214	0.00429637	0.00501792	0.0045088	0.00479464	0.00482563	0.00370698	0.0042735	0.00501739	0.00352009	0.00413303	0.00216757	0.00499246	0.00299763	0.00503429	0.00502307	0.00369107	0.00332888	0.00376975	0.00501797	0.00275613	0.00210255	0.00202497
Sum C16	LPC		+H+					QQQ+ SRM Q3mz184	LPC 13:0	Concentration	nmol/mg protein	0.000960502	0.163544	0.148844	0.150253	0.132006	0.12162	0.0978047	0.0903971	0.0849207	0.142924	0.0609536	0.124782	0.0740375	0.242909	0.264233	0.185066	0.139902	0.148493	0.158007	0.175186	0.146341	0.123416	0.159339	0.137727	0.120799	0.0821557	0.181498	0.137392	0.107285	0.165653	0.112925	0.147003	0.120521	0.26221	0.0936593	0.0676692	0.049441
Sum C18	LPC		+H+					QQQ+ SRM Q3mz184	LPC 13:0	Concentration	nmol/mg protein	0.000588578	0.39471	0.342741	0.364081	0.312769	0.259589	0.233672	0.213163	0.202305	0.334581	0.208395	0.369274	0.243217	0.722546	0.801123	0.581061	0.478215	0.487223	0.497493	0.471301	0.367496	0.295558	0.479604	0.414743	0.353026	0.260434	0.557931	0.427301	0.300629	0.451853	0.312046	0.504	0.387738	1.11124	0.283991	0.189383	0.148527
Sum C20	LPC		+H+					QQQ+ SRM Q3mz184	LPC 13:0	Concentration	nmol/mg protein	0.000902542	0.0559953	0.0580333	0.0577739	0.0523886	0.0407612	0.0397739	0.0361611	0.0318996	0.0506248	0.0392068	0.0662341	0.0462926	0.103197	0.107639	0.0818813	0.0901392	0.0839901	0.0825222	0.0702403	0.0479139	0.0406627	0.113064	0.092081	0.0802136	0.0671057	0.111605	0.0965367	0.0579789	0.09013	0.0531564	0.0972966	0.080893	0.281452	0.0842921	0.0557325	0.047358
Sum C22	LPC		+H+					QQQ+ SRM Q3mz184	LPC 13:0	Concentration	nmol/mg protein	0.00169104	0.0389095	0.0328033	0.0323192	0.033641	0.0291341	0.0292437	0.0344014	0.0246525	0.0452757	0.0326627	0.0531075	0.0308382	0.0435889	0.0459693	0.033786	0.0403743	0.0354929	0.0500263	0.0616826	0.0433317	0.0411578	0.0734239	0.05956	0.045771	0.0278694	0.0539434	0.0421214	0.0405688	0.0575243	0.0366751	0.0377195	0.0326642	0.105086	0.0502792	0.0335871	0.0287078
Sum DB0	LPC		+H+					QQQ+ SRM Q3mz184	LPC 13:0	Concentration	nmol/mg protein	0.00196696	0.298541	0.2814	0.270168	0.220764	0.205922	0.164956	0.154391	0.153079	0.257551	0.12507	0.231575	0.13772	0.181775	0.206441	0.148981	0.138445	0.148126	0.180661	0.404323	0.350006	0.299069	0.223283	0.204784	0.163512	0.0948326	0.207919	0.14331	0.218993	0.319457	0.243227	0.153718	0.131715	0.185306	0.132867	0.0938884	0.0718271
Sum DB1	LPC		+H+					QQQ+ SRM Q3mz184	LPC 13:0	Concentration	nmol/mg protein	5.35609e-05	0.260693	0.218706	0.241675	0.22429	0.178985	0.167149	0.155646	0.135751	0.233911	0.148611	0.271403	0.179846	0.745449	0.817719	0.585701	0.458539	0.470051	0.472331	0.260195	0.182751	0.142108	0.418054	0.346594	0.297539	0.238965	0.514934	0.404285	0.191448	0.298456	0.186021	0.463638	0.356631	1.09184	0.241253	0.158103	0.123467
Sum DB2	LPC		+H+					QQQ+ SRM Q3mz184	LPC 13:0	Concentration	nmol/mg protein	0.000410963	0.0133023	0.0140862	0.014646	0.0140306	0.00944243	0.0107686	0.00900635	0.0103695	0.0123706	0.00815985	0.013042	0.00715676	0.0431709	0.049754	0.0354123	0.025777	0.0238879	0.0268996	0.009508	0.00562117	0.0042883	0.0222131	0.0186278	0.0187851	0.0105558	0.0249154	0.0230819	0.00653034	0.0116329	0.0056832	0.0405071	0.0274053	0.0981736	0.0127996	0.00850256	0.00727194
Sum DB3	LPC		+H+					QQQ+ SRM Q3mz184	LPC 13:0	Concentration	nmol/mg protein		0.0182705	0.0188859	0.0202761	0.0168679	0.0123216	0.0140212	0.0143325	0.0134977	0.018723	0.012416	0.0207875	0.0122811	0.0588469	0.063972	0.0451466	0.0434717	0.0411645	0.0393993	0.0173704	0.00973587	0.00782451	0.0584833	0.0413632	0.0346078	0.0270023	0.0505901	0.0448327	0.0152595	0.0203661	0.0124215	0.0596756	0.0502257	0.161932	0.0289765	0.0176585	0.0135771
Sum DB4	LPC		+H+					QQQ+ SRM Q3mz184	LPC 13:0	Concentration	nmol/mg protein	0.000851231	0.0397683	0.0300411	0.0366314	0.0342904	0.0271265	0.0261698	0.0228908	0.0193097	0.0307515	0.0315046	0.0502776	0.0378868	0.0497174	0.0514968	0.0427207	0.0551041	0.0474839	0.0477793	0.0579875	0.0383877	0.0323146	0.06763	0.0612488	0.0576166	0.0440578	0.0711497	0.0594604	0.0496884	0.0794365	0.0485823	0.0450701	0.037137	0.134597	0.0616196	0.0448661	0.038205
Sum DB5	LPC		+H+					QQQ+ SRM Q3mz184	LPC 13:0	Concentration	nmol/mg protein	0.000902542	0.0149681	0.0149326	0.0159338	0.0138763	0.0121406	0.0105698	0.012175	0.00846266	0.0128357	0.0108892	0.0167401	0.0134586	0.0198516	0.0179657	0.0144458	0.0164507	0.0151314	0.0130622	0.0164032	0.00985832	0.0114039	0.0203815	0.0190054	0.0193691	0.0134989	0.0212837	0.0164988	0.0156046	0.0186657	0.0122062	0.0169436	0.0135175	0.0549493	0.0228416	0.0147466	0.013066
Sum DB6	LPC		+H+					QQQ+ SRM Q3mz184	LPC 13:0	Concentration	nmol/mg protein	0.000360928	0.0120749	0.00921303	0.00972958	0.0114644	0.00894415	0.00988779	0.00909907	0.00653405	0.0129934	0.00726283	0.0139802	0.00850163	0.0189822	0.0187367	0.0136835	0.0158612	0.0138628	0.0127104	0.0174485	0.0124291	0.00805962	0.0204036	0.0160087	0.0125137	0.0108206	0.0191787	0.0148802	0.0139724	0.0221688	0.0103527	0.00979541	0.00895463	0.0382027	0.0146202	0.0107086	0.00864518
Sum Total	LPC		+H+					QQQ+ SRM Q3mz184	LPC 13:0	Concentration	nmol/mg protein	0.00454619	0.657619	0.587264	0.60906	0.535583	0.454883	0.403523	0.377541	0.347003	0.579136	0.343914	0.617806	0.39685	1.11779	1.22608	0.886091	0.753649	0.759708	0.792843	0.783236	0.608789	0.505068	0.830448	0.707631	0.603943	0.439733	0.909971	0.706349	0.511496	0.770183	0.518494	0.789348	0.625585	1.765	0.514978	0.348474	0.276059
LPC 15:0	LPC	C23H49N1O7P1	+H+	482.324	15	0	0	QQQ+ SRM Q3mz184	LPC 13:0	% of total LPC	%	8.87608	0.678159	0.824738	0.760486	0.892093	0.830747	0.750571	0.9053	0.92946	0.989596	0.783732	0.713471	0.621078	0.49679	0.580825	0.484868	0.665816	0.593492	0.60474	0.616114	0.60891	0.846122	0.604179	0.497447	0.684341	0.492929	0.54864	0.424384	0.984228	0.652191	0.711884	0.421726	0.602596	0.284304	0.535194	0.603361	0.733526
LPC 16:0	LPC	C24H51N1O7P1	+H+	496.34	16	0	0	QQQ+ SRM Q3mz184	LPC 13:0	% of total LPC	%	21.1276	20.5268	21.3202	20.2246	19.0523	21.1612	19.0742	18.0598	18.9734	19.2834	13.8707	15.1916	14.1216	11.2035	10.9618	11.3681	11.1082	12.1719	12.16	19.7169	21.3893	21.9366	13.5776	13.8199	14.1913	12.0232	13.4983	12.7437	17.8685	17.8403	18.7456	10.7787	11.0232	6.46034	12.8997	14.0163	12.8376
LPC 16:1	LPC	C24H49N1O7P1	+H+	494.324	16	1	0	QQQ+ SRM Q3mz184	LPC 13:0	% of total LPC	%	0	4.34239	4.02502	4.44518	5.59495	5.5753	5.16352	5.88385	5.49917	5.39538	3.85279	5.00607	4.53463	10.5276	10.5892	9.51757	7.45514	7.37418	7.76915	2.65004	2.64875	2.49888	5.60951	5.64329	5.81045	6.65992	6.4472	6.7073	3.10614	3.66789	3.03394	7.84464	8.2421	8.39575	5.28738	5.40243	5.07198
LPC 18:0	LPC	C26H55N1O7P1	+H+	524.371	18	0	0	QQQ+ SRM Q3mz184	LPC 13:0	% of total LPC	%	2.72874	22.4758	22.3941	21.76	18.9686	21.2191	18.604	18.2836	21.0399	20.6421	18.4078	18.3054	18.6999	4.23898	4.80565	4.7088	6.14058	6.21647	7.16945	27.8394	32.0716	32.0319	9.98797	12.2162	11.4483	8.78032	8.08031	6.42231	22.4959	21.6116	25.8032	7.38132	8.23719	3.35719	10.5848	11.2643	11.5157
LSM 18:1	LPC	C26H53N1O7P1	+H+	522.355	18	1	0	QQQ+ SRM Q3mz184	LPC 13:0	% of total LPC	%	1.17815	0.0820459	0	0	0.0937304	0.0873595	0	0.0763025	0	0.0657089	0.174633	0.102308	0	0	0.0939577	0	0.159843	0	0.0728566	0.118758	0.0833282	0	0.143121	0.12045	0.172335	0.0263101	0.0650579	0.0435165	0.113345	0.10398	0.122596	0.157255	0.150142	0.0651946	0.061069	0.122453	0.214686
LPC 18:1	LPC	C26H53N1O7P1	+H+	522.355	18	1	0	QQQ+ SRM Q3mz184	LPC 13:0	% of total LPC	%	0	35.2176	33.2164	35.2349	36.189	33.6849	36.2589	35.266	33.6218	34.9286	39.1843	38.8217	40.7836	56.1618	56.0104	56.5819	53.2275	54.4985	51.7323	30.4517	27.2867	25.6375	44.5881	43.2157	43.2833	47.657	50.0758	50.4851	34.2095	34.9795	32.7207	50.735	48.6153	53.3997	41.4988	39.8453	39.4381
LPC 18:2	LPC	C26H51N1O7P1	+H+	520.34	18	2	0	QQQ+ SRM Q3mz184	LPC 13:0	% of total LPC	%	9.03974	2.0228	2.39861	2.40469	2.61968	2.07579	2.66865	2.38553	2.9883	2.13605	2.37264	2.11102	1.80339	3.86215	4.05795	3.99647	3.42029	3.14436	3.39281	1.21394	0.923335	0.849053	2.67483	2.63241	3.11042	2.4005	2.73805	3.26777	1.27671	1.5104	1.0961	5.13172	4.38074	5.56224	2.48548	2.43994	2.63419
LPC 18:3	LPC	C26H49N1O7P1	+H+	518.324	18	3	0	QQQ+ SRM Q3mz184	LPC 13:0	% of total LPC	%	0	0.222848	0.353103	0.378058	0.526844	0	0.376348	0.449496	0.650745	0	0.455874	0.431401	0	0.377441	0.371978	0.288609	0.505038	0.273584	0.380552	0.549789	0	0	0.358345	0.425294	0.439173	0.361503	0.353927	0.275713	0.679104	0.462835	0.440557	0.444885	0.596643	0.575138	0.516125	0.674328	0
LPC 20:0	LPC	C28H59N1O7P1	+H+	552.402	20	0	0	QQQ+ SRM Q3mz184	LPC 13:0	% of total LPC	%	0	0.503237	1.97421	0.646908	1.01021	0.521855	0.558607	0.421763	0.622503	0.806531	0.496002	0.543605	0.465301	0.150358	0.117908	0.111248	0.210554	0.225473	0.170738	0.818188	0.601424	0.698701	0.304989	0.464042	0.265306	0.151891	0.165213	0.189279	0.624494	0.526874	0.589823	0.182075	0.407635	0.0539928	0.28164	0.298756	0.218479
LPC 20:3	LPC	C28H53N1O7P1	+H+	546.355	20	3	0	QQQ+ SRM Q3mz184	LPC 13:0	% of total LPC	%	0	2.55544	2.86281	2.95103	2.6226	2.70875	3.09836	3.34679	3.23905	3.23292	3.15433	2.93334	3.09464	4.88712	4.84561	4.80642	5.26312	5.14488	4.58882	1.66799	1.59922	1.5492	6.68403	5.42001	5.29113	5.77911	5.20561	6.0714	2.3042	2.18149	1.95512	7.11523	7.43194	8.59948	5.11062	4.39305	4.91818
LPC 20:4	LPC	C28H51N1O7P1	+H+	544.34	20	4	0	QQQ+ SRM Q3mz184	LPC 13:0	% of total LPC	%	0	4.94209	4.38986	5.0514	5.22894	4.87869	5.61167	4.54237	4.54972	4.02661	6.83474	6.29925	7.12852	3.75414	3.42725	3.89885	6.03056	5.28554	5.17035	5.93195	5.2028	5.03575	6.13534	6.50113	7.16383	8.453	6.50699	7.03855	7.75465	8.44474	7.0689	4.44269	4.51836	6.59876	9.60586	9.61725	10.4764
LPC 20:5	LPC	C28H49N1O7P1	+H+	542.324	20	5	0	QQQ+ SRM Q3mz184	LPC 13:0	% of total LPC	%	19.8527	0.514093	0.655084	0.836425	0.919844	0.851519	0.588024	1.26714	0.781592	0.675375	0.915118	0.944676	0.976554	0.440572	0.388295	0.42422	0.456139	0.399685	0.478485	0.549836	0.466922	0.767277	0.490475	0.627402	0.561392	0.87656	0.386866	0.36777	0.65181	0.549314	0.638226	0.586214	0.572827	0.694017	1.37	1.68424	1.54197
LPC 22:0	LPC	C30H63N1O7P1	+H+	580.434	22	0	0	QQQ+ SRM Q3mz184	LPC 13:0	% of total LPC	%	10.5337	1.21331	1.40376	0.966214	1.2961	1.53632	1.89172	3.22345	2.54924	2.74996	2.80852	2.72949	0.795316	0.172304	0.37125	0.140215	0.244843	0.290361	2.68159	2.63152	2.82087	3.70029	2.41229	1.9418	0.484734	0.117623	0.556433	0.509169	0.841075	0.847064	1.05977	0.710191	0.78403	0.343071	1.49928	0.760015	0.71341
LPC 22:4	LPC	C30H55N1O7P1	+H+	572.371	22	4	0	QQQ+ SRM Q3mz184	LPC 13:0	% of total LPC	%	18.7241	1.10524	0.725562	0.963015	1.17351	1.08473	0.873673	1.52076	1.01496	1.28329	2.32587	1.83885	2.41835	0.693669	0.772854	0.922404	1.28108	0.964745	0.855977	1.47164	1.10279	1.36231	2.00845	2.15434	2.37624	1.56622	1.31191	1.37944	1.95967	1.86924	2.30099	1.26711	1.418	1.02712	2.35963	3.25778	3.36305
LPC 22:5	LPC	C30H53N1O7P1	+H+	570.355	22	5	0	QQQ+ SRM Q3mz184	LPC 13:0	% of total LPC	%	0	1.76202	1.88765	1.7797	1.67103	1.81743	2.03135	1.95767	1.65719	1.54098	2.25114	1.76494	2.41479	1.33539	1.077	1.20606	1.72667	1.59206	1.16903	1.54445	1.15241	1.49062	1.9638	2.05837	2.64572	2.19324	1.95208	1.96802	2.39897	1.87423	1.71595	1.56032	1.58796	2.41925	3.06547	2.54753	3.19106
LPC 22:6	LPC	C30H51N1O7P1	+H+	568.34	22	6	0	QQQ+ SRM Q3mz184	LPC 13:0	% of total LPC	%	7.93914	1.83616	1.56881	1.59747	2.14055	1.96625	2.45037	2.41009	1.88299	2.24357	2.11182	2.26288	2.14228	1.69819	1.52818	1.54425	2.10459	1.82475	1.60314	2.22775	2.04161	1.59575	2.45694	2.2623	2.07201	2.46073	2.10762	2.10664	2.73168	2.87838	1.99669	1.24095	1.4314	2.16446	2.83899	3.073	3.13164
Sum C15	LPC		+H+					QQQ+ SRM Q3mz184	LPC 13:0	% of total LPC	%	8.87608	0.678159	0.824738	0.760486	0.892093	0.830747	0.750571	0.9053	0.92946	0.989596	0.783732	0.713471	0.621078	0.49679	0.580825	0.484868	0.665816	0.593492	0.60474	0.616114	0.60891	0.846122	0.604179	0.497447	0.684341	0.492929	0.54864	0.424384	0.984228	0.652191	0.711884	0.421726	0.602596	0.284304	0.535194	0.603361	0.733526
Sum C16	LPC		+H+					QQQ+ SRM Q3mz184	LPC 13:0	% of total LPC	%	21.1276	24.8691	25.3453	24.6697	24.6472	26.7365	24.2377	23.9437	24.4726	24.6787	17.7235	20.1976	18.6563	21.7311	21.5509	20.8857	18.5633	19.5461	19.9292	22.367	24.0381	24.4355	19.1871	19.4632	20.0018	18.6831	19.9455	19.451	20.9747	21.5082	21.7795	18.6234	19.2653	14.8561	18.1871	19.4187	17.9096
Sum C18	LPC		+H+					QQQ+ SRM Q3mz184	LPC 13:0	% of total LPC	%	12.9466	60.0211	58.3622	59.7776	58.3979	57.0672	57.9079	56.461	58.3007	57.7724	60.5952	59.7719	61.2869	64.6404	65.3399	65.5758	63.4533	64.1329	62.748	60.1736	60.365	58.5185	57.7524	58.61	58.4535	59.2256	61.3131	60.4944	58.7745	58.6683	60.1831	63.8501	61.98	62.9594	55.1463	54.3463	53.8027
Sum C20	LPC		+H+					QQQ+ SRM Q3mz184	LPC 13:0	% of total LPC	%	19.8527	8.51485	9.88197	9.48576	9.78159	8.96081	9.85667	9.57806	9.19287	8.74143	11.4002	10.7209	11.665	9.23219	8.77906	9.24074	11.9604	11.0556	10.4084	8.96796	7.87036	8.05093	13.6148	13.0126	13.2817	15.2606	12.2647	13.667	11.3352	11.7024	10.2521	12.3262	12.9308	15.9463	16.3681	15.9933	17.155
Sum C22	LPC		+H+					QQQ+ SRM Q3mz184	LPC 13:0	% of total LPC	%	37.1969	5.91672	5.58578	5.3064	6.28119	6.40474	7.24711	9.11196	7.10439	7.8178	9.49734	8.59615	7.77073	3.89955	3.74928	3.81293	5.35718	4.67192	6.30973	7.87535	7.11768	8.14896	8.84148	8.41681	7.5787	6.33781	5.92804	5.96326	7.93139	7.46891	7.0734	4.77857	5.22139	5.9539	9.76337	9.63833	10.3992
Sum DB0	LPC		+H+					QQQ+ SRM Q3mz184	LPC 13:0	% of total LPC	%	43.2662	45.3973	47.9171	44.3581	41.2193	45.2693	40.8791	40.894	44.1145	44.4716	36.3667	37.4835	34.7032	16.262	16.8374	16.8132	18.37	19.4977	22.7865	51.6221	57.4921	59.2136	26.887	28.9393	27.074	21.5659	22.8489	20.2888	42.8142	41.478	46.9102	19.474	21.0546	10.4989	25.8006	26.9427	26.0187
Sum DB1	LPC		+H+					QQQ+ SRM Q3mz184	LPC 13:0	% of total LPC	%	1.17815	39.642	37.2414	39.6801	41.8777	39.3476	41.4225	41.2262	39.1209	40.3896	43.2117	43.9301	45.3183	66.6894	66.6935	66.0995	60.8425	61.8727	59.5743	33.2205	30.0188	28.1364	50.3408	48.9794	49.2661	54.3432	56.588	57.2359	37.429	38.7513	35.8772	58.7369	57.0075	61.8606	46.8473	45.3702	44.7248
Sum DB2	LPC		+H+					QQQ+ SRM Q3mz184	LPC 13:0	% of total LPC	%	9.03974	2.0228	2.39861	2.40469	2.61968	2.07579	2.66865	2.38553	2.9883	2.13605	2.37264	2.11102	1.80339	3.86215	4.05795	3.99647	3.42029	3.14436	3.39281	1.21394	0.923335	0.849053	2.67483	2.63241	3.11042	2.4005	2.73805	3.26777	1.27671	1.5104	1.0961	5.13172	4.38074	5.56224	2.48548	2.43994	2.63419
Sum DB3	LPC		+H+					QQQ+ SRM Q3mz184	LPC 13:0	% of total LPC	%	0	2.77828	3.21591	3.32909	3.14944	2.70875	3.47471	3.79629	3.8898	3.23292	3.6102	3.36474	3.09464	5.26456	5.21758	5.09503	5.76816	5.41847	4.96937	2.21778	1.59922	1.5492	7.04238	5.8453	5.73031	6.14062	5.55953	6.34711	2.98331	2.64432	2.39568	7.56011	8.02859	9.17462	5.62675	5.06738	4.91818
Sum DB4	LPC		+H+					QQQ+ SRM Q3mz184	LPC 13:0	% of total LPC	%	18.7241	6.04732	5.11543	6.01441	6.40245	5.96342	6.48535	6.06312	5.56469	5.3099	9.16061	8.1381	9.54687	4.44781	4.20011	4.82126	7.31163	6.25028	6.02633	7.40359	6.30558	6.39806	8.14379	8.65547	9.54007	10.0192	7.8189	8.41799	9.71432	10.314	9.36989	5.7098	5.93636	7.62588	11.9655	12.875	13.8394
Sum DB5	LPC		+H+					QQQ+ SRM Q3mz184	LPC 13:0	% of total LPC	%	19.8527	2.27611	2.54274	2.61613	2.59088	2.66895	2.61938	3.22481	2.43878	2.21635	3.16626	2.70961	3.39134	1.77596	1.46529	1.63028	2.18281	1.99174	1.64751	2.09428	1.61933	2.25789	2.45428	2.68577	3.20711	3.0698	2.33894	2.33579	3.05078	2.42354	2.35417	2.14654	2.16078	3.11327	4.43546	4.23177	4.73303
Sum DB6	LPC		+H+					QQQ+ SRM Q3mz184	LPC 13:0	% of total LPC	%	7.93914	1.83616	1.56881	1.59747	2.14055	1.96625	2.45037	2.41009	1.88299	2.24357	2.11182	2.26288	2.14228	1.69819	1.52818	1.54425	2.10459	1.82475	1.60314	2.22775	2.04161	1.59575	2.45694	2.2623	2.07201	2.46073	2.10762	2.10664	2.73168	2.87838	1.99669	1.24095	1.4314	2.16446	2.83899	3.073	3.13164
Sum Total	LPC		+H+					QQQ+ SRM Q3mz184	LPC 13:0	% of total LPC	%	100	100	100	100	100	100	100	100	100	100	100	100	100	100	100	100	100	100	100	100	100	100	100	100	100	100	100	100	100	100	100	100	100	100	100	100	100
PC 30:0	PC	C38H77N1O8P1	+H+	706.538	30	0	0	QQQ+ SRM Q3mz184	PC 28:0	Concentration	nmol/mg protein	0	1.41202	1.13637	1.25746	1.23419	1.13957	0.942429	0.975715	0.907029	1.41222	0.490716	0.945588	0.591506	2.72511	3.17461	2.31404	1.65613	1.90075	1.71987	1.06727	0.780906	0.66101	1.1864	1.03322	0.937732	1.64832	2.70538	1.83112	0.86897	1.22044	0.777823	1.75437	1.59249	1.30618	1.13044	0.793895	0.715704
PC 30:1	PC	C38H75N1O8P1	+H+	704.522	30	1	0	QQQ+ SRM Q3mz184	PC 28:0	Concentration	nmol/mg protein	0	0.556214	0.404933	0.528984	0.545038	0.409045	0.396698	0.45092	0.404763	0.681832	0.208558	0.445804	0.305681	1.23747	1.48908	1.0226	0.596872	0.687141	0.643348	0.473994	0.364996	0.293843	0.625395	0.697134	0.679062	0.581718	1.03407	0.701098	0.408309	0.554264	0.329627	0.964499	0.937201	0.711468	0.446158	0.405585	0.353509
PC 32:0	PC	C40H81N1O8P1	+H+	734.569	32	0	0	QQQ+ SRM Q3mz184	PC 28:0	Concentration	nmol/mg protein	0	2.85893	2.23773	2.48525	2.56908	2.43375	1.97469	2.03364	1.86059	2.91216	1.12396	2.29181	1.40811	3.53117	4.12456	2.9806	2.8904	3.26306	3.00012	3.01557	2.17144	1.71272	2.22551	1.81179	1.58053	3.28634	5.35736	3.53013	2.55012	3.63933	2.40393	2.03712	1.82346	1.70706	2.66959	1.83184	1.76293
PC 32:1	PC	C40H79N1O8P1	+H+	732.554	32	1	0	QQQ+ SRM Q3mz184	PC 28:0	Concentration	nmol/mg protein	0	5.00823	3.96585	4.48739	4.35438	3.97946	3.30743	3.5439	3.27936	5.08692	1.81436	3.51778	2.13111	8.398	9.66392	6.93815	4.65471	5.27981	4.90824	3.83088	2.80083	2.19687	5.49193	4.72132	4.26937	4.44711	7.3947	4.83126	3.15062	4.521	2.9194	6.72193	5.96155	4.37075	3.39902	2.54931	2.19411
PC 32:2	PC	C40H77N1O8P1	+H+	730.538	32	2	0	QQQ+ SRM Q3mz184	PC 28:0	Concentration	nmol/mg protein	0	0.758384	0.592287	0.678536	0.732319	0.665376	0.567879	0.622339	0.554615	0.859805	0.265394	0.509464	0.302945	1.03563	1.20155	0.86731	0.597845	0.697534	0.639178	0.579189	0.447167	0.33665	0.612818	0.516438	0.471272	0.597665	0.992431	0.653818	0.497879	0.688782	0.446334	1.09899	0.945695	0.686766	0.956617	0.683102	0.570956
PC 34:0	PC	C42H85N1O8P1	+H+	762.601	34	0	0	QQQ+ SRM Q3mz184	PC 28:0	Concentration	nmol/mg protein	0	0.915084	0.804201	0.807365	0.682761	0.674116	0.525363	0.534199	0.484052	0.80282	0.581035	1.21757	0.684695	0.755498	0.882046	0.668686	0.719735	0.801305	0.689025	1.4527	1.02552	0.817258	0.970995	0.845017	0.727563	1.04533	1.6781	1.10682	1.00326	1.45614	1.00297	0.701703	0.650921	0.632588	1.20771	0.844753	0.802542
PC 34:1	PC	C42H83N1O8P1	+H+	760.585	34	1	0	QQQ+ SRM Q3mz184	PC 28:0	Concentration	nmol/mg protein	0	16.4493	13.3492	14.6385	13.1376	12.1961	10.043	10.3918	9.18388	14.5041	7.64354	14.5344	8.9176	21.5385	24.5699	17.4373	13.5738	15.3474	14.4271	17.1433	12.8864	10.3454	19.5721	16.4191	14.5565	15.5903	25.8192	16.8702	13.0709	18.718	12.3366	17.6601	16.0078	13.3439	13.4409	9.7949	8.70189
PC 34:2	PC	C42H81N1O8P1	+H+	758.569	34	2	0	QQQ+ SRM Q3mz184	PC 28:0	Concentration	nmol/mg protein	0	4.55583	3.59756	4.09145	3.97815	3.67286	3.0972	3.32239	2.96154	4.63292	1.75509	3.31119	2.03866	5.82975	6.74333	4.71167	3.42365	3.90585	3.69875	3.51015	2.5806	2.12452	4.31091	3.63355	3.32565	3.32948	5.56882	3.71844	2.60024	3.73021	2.49307	5.10446	4.59036	3.43682	2.87382	2.22391	1.79666
PC 34:3	PC	C42H79N1O8P1	+H+	756.554	34	3	0	QQQ+ SRM Q3mz184	PC 28:0	Concentration	nmol/mg protein	0	0.509409	0.398771	0.442537	0.443998	0.413166	0.33963	0.374792	0.323151	0.511598	0.201368	0.365747	0.217816	0.537789	0.62141	0.450545	0.320053	0.367401	0.345058	0.433373	0.323942	0.265092	0.387081	0.326715	0.293527	0.355087	0.582578	0.408912	0.320285	0.463902	0.29981	0.673281	0.583882	0.437382	0.651025	0.510681	0.389499
PC 36:0	PC	C44H89N1O8P1	+H+	790.632	36	0	0	QQQ+ SRM Q3mz184	PC 28:0	Concentration	nmol/mg protein	0	0.0762618	0.050814	0.0667338	0.0631804	0.0567652	0.0437793	0.0512287	0.0516701	0.083333	0.0338004	0.0863647	0.0559701	0.055347	0.0891916	0.0453538	0.0601678	0.0674542	0.0421817	0.117806	0.10259	0.0817959	0.191142	0.15087	0.130447	0.064015	0.0821161	0.0658318	0.0907024	0.0700222	0.09604	0.0522687	0.0753253	0.0864696	0.103034	0.089012	0.097695
PC 36:1	PC	C44H87N1O8P1	+H+	788.616	36	1	0	QQQ+ SRM Q3mz184	PC 28:0	Concentration	nmol/mg protein	0	4.94001	4.00615	4.26395	3.73456	3.43163	2.88366	3.01901	2.64794	4.06441	3.33655	6.49469	3.9636	5.92233	6.83027	4.93085	4.51596	5.07583	4.61738	7.74896	5.70807	4.66474	6.66278	5.53405	5.10487	5.08111	8.2905	5.39112	5.20778	7.36919	4.953	7.17494	6.37396	5.25985	4.465	3.39064	3.03349
PC 36:2	PC	C44H85N1O8P1	+H+	786.601	36	2	0	QQQ+ SRM Q3mz184	PC 28:0	Concentration	nmol/mg protein	0	7.98594	6.41461	7.13423	6.37781	5.8827	4.90184	5.01216	4.45624	7.10793	3.78585	7.30286	4.431	9.40528	10.892	7.67529	6.19317	7.00998	6.59413	8.13799	6.00038	4.81597	9.33654	7.4114	6.73501	7.19478	11.7859	7.70911	5.27041	7.57201	4.97345	8.71128	7.88532	6.38106	5.71043	4.45782	3.6151
PC 36:3	PC	C44H83N1O8P1	+H+	784.585	36	3	0	QQQ+ SRM Q3mz184	PC 28:0	Concentration	nmol/mg protein	0	1.36383	1.10368	1.18885	1.12496	0.995291	0.86071	0.911609	0.808948	1.27274	0.551074	1.09186	0.652289	1.91389	2.1982	1.58955	1.09575	1.26309	1.18061	1.10102	0.817709	0.659359	1.97227	1.6622	1.54937	1.28372	2.06792	1.38777	0.676193	0.997628	0.673828	2.25974	1.98609	1.60464	1.11809	0.836538	0.704897
PC 36:4	PC	C44H81N1O8P1	+H+	782.569	36	4	0	QQQ+ SRM Q3mz184	PC 28:0	Concentration	nmol/mg protein	0	0.964352	0.809752	0.850484	0.764789	0.746915	0.590907	0.607774	0.538622	0.853445	0.496576	0.986223	0.586057	0.837902	0.939722	0.677693	0.609182	0.745059	0.654861	1.38683	1.0095	0.844296	1.09172	0.977015	0.922691	0.857634	1.36232	0.88337	1.17218	1.67735	1.10602	0.819702	0.744063	0.668093	0.857557	0.592844	0.52947
PC 36:5	PC	C44H79N1O8P1	+H+	780.554	36	5	0	QQQ+ SRM Q3mz184	PC 28:0	Concentration	nmol/mg protein	0	0.270843	0.227832	0.251539	0.202724	0.20455	0.156861	0.160045	0.143793	0.229471	0.113416	0.232974	0.135521	0.147499	0.162199	0.116342	0.118992	0.142336	0.1246	0.296683	0.208961	0.180714	0.220058	0.204207	0.19021	0.136472	0.210243	0.139556	0.225796	0.332159	0.210125	0.15983	0.141779	0.140767	0.231533	0.158747	0.155524
PC 38:1	PC	C46H91N1O8P1	+H+	816.648	38	1	0	QQQ+ SRM Q3mz184	PC 28:0	Concentration	nmol/mg protein	0	0.222872	0.208964	0.223019	0.170629	0.185521	0.130968	0.154457	0.114911	0.166492	0.109719	0.25408	0.149977	0.320118	0.307108	0.278169	0.191428	0.222762	0.210878	0.34327	0.26886	0.196731	0.455405	0.345208	0.343397	0.241017	0.400066	0.255691	0.217679	0.290203	0.181085	0.344811	0.347875	0.315405	0.279251	0.148236	0.149524
PC 38:2	PC	C46H89N1O8P1	+H+	814.632	38	2	0	QQQ+ SRM Q3mz184	PC 28:0	Concentration	nmol/mg protein	0	0.605422	0.4482	0.579429	0.484111	0.451659	0.360553	0.394108	0.346905	0.488072	0.355712	0.650289	0.369132	1.03681	1.3746	0.867168	0.799197	0.86202	0.75109	0.763345	0.588531	0.419534	1.11646	0.787225	0.819957	0.906704	1.42432	0.968792	0.40676	0.681615	0.389314	1.16644	1.03403	0.805235	0.517958	0.427291	0.344942
PC 38:3	PC	C46H87N1O8P1	+H+	812.616	38	3	0	QQQ+ SRM Q3mz184	PC 28:0	Concentration	nmol/mg protein	0	1.32837	1.04393	1.14657	0.990903	0.881403	0.745992	0.907847	0.780189	1.23263	0.843024	1.57629	0.958686	1.98769	2.22834	1.66274	1.41843	1.54743	1.41699	1.65479	1.22883	0.950633	2.46826	2.1503	1.93889	2.00168	3.23485	2.13554	1.10908	1.46294	1.05909	2.72589	2.44629	1.9449	1.63275	1.17078	1.00772
PC 38:4	PC	C46H85N1O8P1	+H+	810.601	38	4	0	QQQ+ SRM Q3mz184	PC 28:0	Concentration	nmol/mg protein	0	2.25762	1.78073	2.01416	1.72006	1.64892	1.36949	1.43936	1.30463	2.03554	1.44347	2.89697	1.7279	1.74016	2.04982	1.47	1.55859	1.80551	1.58527	3.9392	2.90322	2.33966	2.7142	2.34796	2.17258	2.26327	3.52959	2.3174	2.95289	4.21584	2.79577	2.14625	1.89071	1.62808	2.38213	1.71217	1.52742
PC 38:5	PC	C46H83N1O8P1	+H+	808.585	38	5	0	QQQ+ SRM Q3mz184	PC 28:0	Concentration	nmol/mg protein	0	1.71448	1.35031	1.51687	1.29778	1.27397	1.0162	0.988649	0.927388	1.45861	0.933646	1.81759	1.09866	0.869582	1.0043	0.734784	0.886429	0.987964	0.901663	2.42512	1.79635	1.45524	1.55005	1.36709	1.22746	1.25853	1.89598	1.2418	1.82889	2.55417	1.74107	0.970459	0.868439	0.823167	1.5894	1.14137	1.01218
PC 38:6	PC	C46H81N1O8P1	+H+	806.569	38	6	0	QQQ+ SRM Q3mz184	PC 28:0	Concentration	nmol/mg protein	0	0.761521	0.616639	0.655252	0.586144	0.573042	0.447059	0.424143	0.384364	0.606153	0.316814	0.619569	0.356072	0.464013	0.521045	0.389759	0.35144	0.41264	0.371846	0.863518	0.662016	0.532575	0.614034	0.528619	0.472448	0.432054	0.655951	0.41652	0.626557	0.920466	0.614789	0.404714	0.382347	0.395873	0.681539	0.456454	0.457283
PC 40:5	PC	C48H87N1O8P1	+H+	836.616	40	5	0	QQQ+ SRM Q3mz184	PC 28:0	Concentration	nmol/mg protein	0	0.463045	0.397783	0.411948	0.350792	0.351124	0.286222	0.275464	0.243301	0.385173	0.274777	0.571047	0.342994	0.310277	0.360087	0.263625	0.295055	0.314639	0.290374	0.744013	0.558578	0.443796	0.521547	0.442511	0.394924	0.410589	0.634634	0.41984	0.545943	0.769431	0.528849	0.41063	0.367457	0.326833	0.494439	0.343528	0.301442
PC 40:6	PC	C48H85N1O8P1	+H+	834.601	40	6	0	QQQ+ SRM Q3mz184	PC 28:0	Concentration	nmol/mg protein	0	0.724615	0.595132	0.674486	0.625281	0.60932	0.484901	0.449836	0.38573	0.633118	0.368751	0.726722	0.447235	0.450744	0.484801	0.358359	0.383929	0.440308	0.377211	1.01522	0.775655	0.618623	0.632534	0.559384	0.520572	0.481371	0.760543	0.499864	0.658321	0.959897	0.641614	0.422078	0.387785	0.420128	0.640813	0.463686	0.403285
Sum C30	PC		+H+					QQQ+ SRM Q3mz184	PC 28:0	Concentration	nmol/mg protein		1.96823	1.5413	1.78644	1.77923	1.54861	1.33913	1.42664	1.31179	2.09406	0.699274	1.39139	0.897187	3.96258	4.66369	3.33664	2.253	2.58789	2.36322	1.54127	1.1459	0.954853	1.81179	1.73036	1.61679	2.23004	3.73944	2.53222	1.27728	1.7747	1.10745	2.71887	2.52969	2.01765	1.5766	1.19948	1.06921
Sum C32	PC		+H+					QQQ+ SRM Q3mz184	PC 28:0	Concentration	nmol/mg protein		8.62554	6.79586	7.65117	7.65579	7.07858	5.85	6.19988	5.69457	8.85889	3.20371	6.31905	3.84217	12.9648	14.99	10.7861	8.14295	9.2404	8.54754	7.42564	5.41943	4.24623	8.33025	7.04955	6.32117	8.33111	13.7445	9.0152	6.19861	8.84911	5.76967	9.85803	8.7307	6.76458	7.02522	5.06426	4.528
Sum C34	PC		+H+					QQQ+ SRM Q3mz184	PC 28:0	Concentration	nmol/mg protein		22.4296	18.1498	19.9798	18.2425	16.9563	14.0051	14.6232	12.9526	20.4514	10.181	19.4289	11.8588	28.6615	32.8166	23.2682	18.0372	20.4219	19.1599	22.5395	16.8165	13.5523	25.2411	21.2244	18.9032	20.3202	33.6487	22.1044	16.9946	24.3683	16.1324	24.1395	21.833	17.8507	18.1735	13.3742	11.6906
Sum C36	PC		+H+					QQQ+ SRM Q3mz184	PC 28:0	Concentration	nmol/mg protein		15.6012	12.6128	13.7558	12.268	11.3178	9.43776	9.76183	8.64721	13.6113	8.31726	16.195	9.82443	18.2822	21.1116	15.0351	12.5932	14.3038	13.2138	18.7893	13.8472	11.2469	19.4745	15.9397	14.6326	14.6177	23.799	15.5768	12.6431	18.0184	12.0125	19.1778	17.2065	14.1409	12.4856	9.5256	8.13617
Sum C38	PC		+H+					QQQ+ SRM Q3mz184	PC 28:0	Concentration	nmol/mg protein		6.89028	5.44877	6.1353	5.24962	5.01452	4.07026	4.30856	3.85839	5.98749	4.00238	7.81479	4.66043	6.41837	7.48521	5.40263	5.20552	5.83833	5.23774	9.98924	7.44781	5.89438	8.91841	7.52639	6.97473	7.10326	11.1408	7.33575	7.14185	10.1252	6.78112	7.75856	6.9697	5.91266	7.08304	5.0563	4.49907
Sum C40	PC		+H+					QQQ+ SRM Q3mz184	PC 28:0	Concentration	nmol/mg protein		1.18766	0.992916	1.08643	0.976073	0.960444	0.771123	0.7253	0.629031	1.01829	0.643528	1.29777	0.790228	0.761021	0.844889	0.621983	0.678984	0.754947	0.667586	1.75923	1.33423	1.06242	1.15408	1.00189	0.915495	0.89196	1.39518	0.919705	1.20426	1.72933	1.17046	0.832708	0.755241	0.746961	1.13525	0.807214	0.704726
Sum DB0	PC		+H+					QQQ+ SRM Q3mz184	PC 28:0	Concentration	nmol/mg protein		5.26229	4.22911	4.6168	4.54921	4.30419	3.48626	3.59478	3.30334	5.21054	2.22951	4.54133	2.74028	7.06712	8.2704	6.00867	5.32643	6.03257	5.4512	5.65335	4.08045	3.27278	4.57404	3.8409	3.37627	6.044	9.82295	6.53391	4.51305	6.38593	4.28077	4.54546	4.14219	3.7323	5.11077	3.5595	3.37887
Sum DB1	PC		+H+					QQQ+ SRM Q3mz184	PC 28:0	Concentration	nmol/mg protein		27.1766	21.9351	24.1418	21.9422	20.2018	16.7617	17.5601	15.6309	24.5037	13.1127	25.2468	15.468	37.4164	42.8602	30.6071	23.5328	26.6129	24.807	29.5404	22.0292	17.6976	32.8076	27.7168	24.9532	25.9413	42.9386	28.0493	22.0552	31.4527	20.7197	32.8662	29.6284	24.0013	22.0304	16.2887	14.4325
Sum DB2	PC		+H+					QQQ+ SRM Q3mz184	PC 28:0	Concentration	nmol/mg protein		13.9056	11.0526	12.4836	11.5724	10.6726	8.92747	9.351	8.3193	13.0887	6.16205	11.7738	7.14174	17.3075	20.2115	14.1214	11.0139	12.4754	11.6832	12.9907	9.61668	7.69668	15.3767	12.3486	11.3519	12.0286	19.7715	13.0502	8.77529	12.6726	8.30216	16.0812	14.4554	11.3099	10.0588	7.79212	6.32766
Sum DB3	PC		+H+					QQQ+ SRM Q3mz184	PC 28:0	Concentration	nmol/mg protein		3.20161	2.54638	2.77796	2.55986	2.28986	1.94633	2.19425	1.91229	3.01697	1.59547	3.0339	1.82879	4.43937	5.04794	3.70284	2.83424	3.17793	2.94266	3.18918	2.37048	1.87508	4.8276	4.13921	3.78179	3.64049	5.88535	3.93222	2.10555	2.92447	2.03273	5.65891	5.01626	3.98693	3.40187	2.518	2.10211
Sum DB4	PC		+H+					QQQ+ SRM Q3mz184	PC 28:0	Concentration	nmol/mg protein		3.22197	2.59048	2.86464	2.48485	2.39584	1.9604	2.04713	1.84325	2.88898	1.94004	3.8832	2.31396	2.57807	2.98954	2.14769	2.16778	2.55057	2.24013	5.32603	3.91272	3.18396	3.80592	3.32497	3.09527	3.12091	4.89191	3.20077	4.12507	5.89318	3.90179	2.96595	2.63478	2.29617	3.23969	2.30501	2.05689
Sum DB5	PC		+H+					QQQ+ SRM Q3mz184	PC 28:0	Concentration	nmol/mg protein		2.44836	1.97592	2.18036	1.85129	1.82965	1.45928	1.42416	1.31448	2.07326	1.32184	2.62161	1.57718	1.32736	1.52658	1.11475	1.30048	1.44494	1.31664	3.46582	2.56389	2.07975	2.29166	2.0138	1.81259	1.80559	2.74086	1.8012	2.60063	3.65575	2.48004	1.54092	1.37767	1.29077	2.31538	1.64365	1.46915
Sum DB6	PC		+H+					QQQ+ SRM Q3mz184	PC 28:0	Concentration	nmol/mg protein		1.48614	1.21177	1.32974	1.21142	1.18236	0.93196	0.873979	0.770093	1.23927	0.685565	1.34629	0.803306	0.914758	1.00585	0.748118	0.735369	0.852949	0.749058	1.87874	1.43767	1.1512	1.24657	1.088	0.99302	0.913425	1.41649	0.916385	1.28488	1.88036	1.2564	0.826792	0.770132	0.816001	1.32235	0.92014	0.860568
Sum Total	PC		+H+					QQQ+ SRM Q3mz184	PC 28:0	Concentration	nmol/mg protein		56.7026	45.5415	50.395	46.1712	42.8763	35.4734	37.0454	33.0936	52.0215	27.0472	52.4469	31.8732	71.0505	81.9121	58.4506	46.9109	53.1472	49.1898	62.0442	46.0111	36.9571	64.9302	54.4723	49.364	53.4943	87.4677	57.484	45.4597	64.865	42.9736	64.4854	58.0249	47.4334	47.4792	35.0271	30.6278
PC 30:0	PC	C38H77N1O8P1	+H+	706.538	30	0	0	QQQ+ SRM Q3mz184	PC 28:0	% of total PC	%		2.49022	2.49524	2.4952	2.67307	2.6578	2.65672	2.63384	2.7408	2.71469	1.81429	1.80294	1.85581	3.83545	3.87563	3.95896	3.53037	3.57639	3.4964	1.72018	1.69721	1.78859	1.82719	1.89679	1.89963	3.0813	3.093	3.18545	1.91152	1.8815	1.81	2.72057	2.74449	2.75372	2.38092	2.26652	2.33678
PC 30:1	PC	C38H75N1O8P1	+H+	704.522	30	1	0	QQQ+ SRM Q3mz184	PC 28:0	% of total PC	%		0.980932	0.889152	1.04968	1.18047	0.954013	1.1183	1.21721	1.22309	1.31067	0.77109	0.85001	0.959054	1.74167	1.8179	1.74951	1.27235	1.2929	1.30789	0.763962	0.793279	0.795092	0.96318	1.27979	1.37562	1.08744	1.18223	1.21964	0.898179	0.854489	0.767046	1.49569	1.61517	1.49993	0.93969	1.15792	1.15421
PC 32:0	PC	C40H81N1O8P1	+H+	734.569	32	0	0	QQQ+ SRM Q3mz184	PC 28:0	% of total PC	%		5.04197	4.9136	4.93154	5.56425	5.67621	5.56666	5.48958	5.62221	5.598	4.15554	4.36976	4.41785	4.96994	5.03535	5.09934	6.16147	6.13966	6.09907	4.86036	4.71939	4.63434	3.42755	3.32607	3.20179	6.14334	6.12497	6.14106	5.60962	5.61062	5.59398	3.15904	3.14254	3.59886	5.62264	5.22979	5.75599
PC 32:1	PC	C40H79N1O8P1	+H+	732.554	32	1	0	QQQ+ SRM Q3mz184	PC 28:0	% of total PC	%		8.83245	8.70822	8.90445	9.43095	9.28127	9.3237	9.56639	9.90936	9.7785	6.70813	6.70732	6.68622	11.8198	11.7979	11.8701	9.92244	9.9343	9.97816	6.17443	6.08729	5.94437	8.4582	8.66738	8.64874	8.31325	8.45422	8.40452	6.93057	6.96986	6.79348	10.4239	10.2741	9.2145	7.15896	7.27812	7.16379
PC 32:2	PC	C40H77N1O8P1	+H+	730.538	32	2	0	QQQ+ SRM Q3mz184	PC 28:0	% of total PC	%		1.33748	1.30054	1.34644	1.58609	1.55185	1.60086	1.67994	1.6759	1.65279	0.981226	0.97139	0.950467	1.45759	1.46688	1.48383	1.27443	1.31246	1.29941	0.93351	0.971869	0.910921	0.943811	0.948074	0.954687	1.11725	1.13463	1.13739	1.09521	1.06187	1.03862	1.70424	1.62981	1.44785	2.01481	1.95021	1.86418
PC 34:0	PC	C42H85N1O8P1	+H+	762.601	34	0	0	QQQ+ SRM Q3mz184	PC 28:0	% of total PC	%		1.61383	1.76587	1.60208	1.47876	1.57223	1.481	1.44201	1.46267	1.54325	2.14822	2.32154	2.14818	1.06332	1.07682	1.14402	1.53426	1.50771	1.40075	2.3414	2.22885	2.21137	1.49545	1.55128	1.47387	1.95409	1.91853	1.92545	2.20693	2.24488	2.33393	1.08816	1.1218	1.33363	2.54365	2.41171	2.62031
PC 34:1	PC	C42H83N1O8P1	+H+	760.585	34	1	0	QQQ+ SRM Q3mz184	PC 28:0	% of total PC	%		29.0098	29.3123	29.0475	28.454	28.4449	28.3112	28.0515	27.7512	27.8809	28.26	27.7126	27.9783	30.3143	29.9954	29.8326	28.9353	28.8771	29.3295	27.6308	28.0072	27.9931	30.1434	30.1421	29.4881	29.1439	29.5186	29.3476	28.7526	28.8569	28.7074	27.3861	27.5879	28.1318	28.3091	27.9638	28.4118
PC 34:2	PC	C42H81N1O8P1	+H+	758.569	34	2	0	QQQ+ SRM Q3mz184	PC 28:0	% of total PC	%		8.03461	7.89952	8.11877	8.61607	8.56618	8.73105	8.96844	8.94898	8.90578	6.489	6.31342	6.39615	8.20507	8.2324	8.06095	7.2982	7.34911	7.51935	5.6575	5.60865	5.74863	6.63931	6.67044	6.73699	6.22399	6.36672	6.46865	5.71989	5.75073	5.80139	7.91568	7.91102	7.24557	6.05278	6.34911	5.86611
PC 34:3	PC	C42H79N1O8P1	+H+	756.554	34	3	0	QQQ+ SRM Q3mz184	PC 28:0	% of total PC	%		0.898388	0.875621	0.878138	0.961633	0.963624	0.957422	1.01171	0.976476	0.983437	0.744505	0.697367	0.683383	0.75691	0.75863	0.770813	0.682258	0.691289	0.701483	0.698492	0.704053	0.717296	0.59615	0.599781	0.594618	0.663785	0.66605	0.711349	0.704546	0.715181	0.697662	1.04408	1.00626	0.922098	1.37118	1.45796	1.27172
PC 36:0	PC	C44H89N1O8P1	+H+	790.632	36	0	0	QQQ+ SRM Q3mz184	PC 28:0	% of total PC	%		0.134494	0.111578	0.132422	0.136839	0.132393	0.123414	0.138286	0.156133	0.16019	0.124968	0.164671	0.175602	0.0778981	0.108887	0.0775933	0.12826	0.126919	0.0857529	0.189874	0.222969	0.221327	0.29438	0.276967	0.264256	0.119667	0.0938817	0.114522	0.199523	0.107951	0.223486	0.081055	0.129816	0.182297	0.217008	0.254123	0.318975
PC 36:1	PC	C44H87N1O8P1	+H+	788.616	36	1	0	QQQ+ SRM Q3mz184	PC 28:0	% of total PC	%		8.71215	8.79671	8.46107	8.08851	8.00356	8.12907	8.1495	8.00136	7.81294	12.336	12.3834	12.4355	8.33537	8.33854	8.43593	9.62667	9.55051	9.38687	12.4894	12.4059	12.6221	10.2615	10.1594	10.3413	9.49841	9.47836	9.37847	11.4558	11.3608	11.5257	11.1264	10.9849	11.0889	9.4041	9.68005	9.90437
PC 36:2	PC	C44H85N1O8P1	+H+	786.601	36	2	0	QQQ+ SRM Q3mz184	PC 28:0	% of total PC	%		14.0839	14.0852	14.1566	13.8134	13.7202	13.8184	13.5298	13.4656	13.6635	13.9972	13.9243	13.902	13.2374	13.2972	13.1312	13.202	13.1897	13.4055	13.1164	13.0412	13.0313	14.3794	13.6058	13.6436	13.4496	13.4746	13.4109	11.5936	11.6735	11.5733	13.5089	13.5896	13.4527	12.0272	12.7268	11.8033
PC 36:3	PC	C44H83N1O8P1	+H+	784.585	36	3	0	QQQ+ SRM Q3mz184	PC 28:0	% of total PC	%		2.40523	2.42346	2.35907	2.4365	2.32131	2.42635	2.46079	2.44442	2.44657	2.03745	2.08184	2.04651	2.69371	2.68361	2.71948	2.33581	2.37659	2.4001	1.77458	1.7772	1.78412	3.03752	3.05145	3.13867	2.39974	2.36421	2.41419	1.48746	1.53801	1.56801	3.50426	3.42282	3.38294	2.3549	2.38826	2.3015
PC 36:4	PC	C44H81N1O8P1	+H+	782.569	36	4	0	QQQ+ SRM Q3mz184	PC 28:0	% of total PC	%		1.70072	1.77805	1.68764	1.65642	1.74202	1.66578	1.64062	1.62757	1.64056	1.83596	1.88042	1.83871	1.1793	1.14723	1.15943	1.29859	1.40188	1.3313	2.23523	2.19404	2.28453	1.68137	1.7936	1.86916	1.60323	1.55751	1.53672	2.5785	2.5859	2.57373	1.27114	1.28232	1.40849	1.80617	1.69253	1.72873
PC 36:5	PC	C44H79N1O8P1	+H+	780.554	36	5	0	QQQ+ SRM Q3mz184	PC 28:0	% of total PC	%		0.477655	0.500274	0.499135	0.43907	0.47707	0.442193	0.432023	0.434504	0.441109	0.419325	0.444208	0.425186	0.207598	0.198016	0.199042	0.253656	0.267814	0.253306	0.478181	0.454154	0.488985	0.338914	0.374882	0.38532	0.255114	0.240367	0.242774	0.496695	0.512077	0.488962	0.247855	0.244342	0.296768	0.487651	0.453211	0.507787
PC 38:1	PC	C46H91N1O8P1	+H+	816.648	38	1	0	QQQ+ SRM Q3mz184	PC 28:0	% of total PC	%		0.393054	0.458844	0.442543	0.369558	0.43269	0.369199	0.416941	0.347232	0.320046	0.405657	0.484452	0.470542	0.45055	0.374924	0.475905	0.408067	0.419142	0.428703	0.553268	0.584339	0.532323	0.701377	0.633731	0.695642	0.450547	0.457387	0.444803	0.47884	0.447395	0.421386	0.534711	0.599528	0.664943	0.588154	0.423205	0.488199
PC 38:2	PC	C46H89N1O8P1	+H+	814.632	38	2	0	QQQ+ SRM Q3mz184	PC 28:0	% of total PC	%		1.06772	0.984158	1.14978	1.04851	1.0534	1.0164	1.06385	1.04825	0.938214	1.31515	1.2399	1.15813	1.45926	1.67814	1.48359	1.70365	1.62195	1.52692	1.23033	1.27911	1.13519	1.71948	1.44518	1.66104	1.69495	1.6284	1.68532	0.89477	1.05082	0.905937	1.80884	1.78205	1.69761	1.09091	1.21989	1.12624
PC 38:3	PC	C46H87N1O8P1	+H+	812.616	38	3	0	QQQ+ SRM Q3mz184	PC 28:0	% of total PC	%		2.3427	2.29227	2.27518	2.14615	2.05569	2.10296	2.45063	2.35752	2.36946	3.11686	3.00549	3.00781	2.79756	2.7204	2.8447	3.02367	2.9116	2.88067	2.66711	2.67073	2.57226	3.8014	3.9475	3.92775	3.74186	3.69834	3.71501	2.43969	2.25536	2.46452	4.22714	4.21593	4.10028	3.43888	3.34251	3.29021
PC 38:4	PC	C46H85N1O8P1	+H+	810.601	38	4	0	QQQ+ SRM Q3mz184	PC 28:0	% of total PC	%		3.98151	3.91013	3.99674	3.72539	3.84577	3.86061	3.88538	3.94224	3.91288	5.33685	5.52363	5.42117	2.44919	2.50247	2.51495	3.32246	3.39718	3.22277	6.34903	6.30983	6.33076	4.18018	4.31037	4.40114	4.23087	4.0353	4.03139	6.49562	6.49941	6.50578	3.32827	3.25845	3.43235	5.01721	4.88812	4.98704
PC 38:5	PC	C46H83N1O8P1	+H+	808.585	38	5	0	QQQ+ SRM Q3mz184	PC 28:0	% of total PC	%		3.02363	2.96501	3.00996	2.81079	2.97128	2.86467	2.66875	2.80232	2.80387	3.45191	3.46558	3.44698	1.22389	1.22607	1.2571	1.8896	1.85892	1.83303	3.9087	3.90417	3.93766	2.38726	2.50969	2.48654	2.35264	2.16764	2.16026	4.0231	3.93767	4.05149	1.50493	1.49667	1.73542	3.34758	3.25854	3.30478
PC 38:6	PC	C46H81N1O8P1	+H+	806.569	38	6	0	QQQ+ SRM Q3mz184	PC 28:0	% of total PC	%		1.34301	1.35402	1.30023	1.2695	1.3365	1.26026	1.14493	1.16144	1.1652	1.17134	1.18133	1.11715	0.653075	0.636103	0.666819	0.749164	0.77641	0.755942	1.39178	1.43882	1.44106	0.945683	0.970436	0.957071	0.807663	0.749935	0.724584	1.37827	1.41905	1.43062	0.627606	0.658937	0.834587	1.43545	1.30315	1.49303
PC 40:5	PC	C48H87N1O8P1	+H+	836.616	40	5	0	QQQ+ SRM Q3mz184	PC 28:0	% of total PC	%		0.816621	0.873453	0.817439	0.759764	0.818923	0.806862	0.743585	0.73519	0.740411	1.01592	1.08881	1.07612	0.436699	0.439602	0.451021	0.628968	0.592013	0.590314	1.19917	1.21401	1.20084	0.803243	0.812359	0.800023	0.767539	0.725565	0.73036	1.20094	1.1862	1.23064	0.63678	0.633274	0.689036	1.04138	0.980749	0.98421
PC 40:6	PC	C48H85N1O8P1	+H+	834.601	40	6	0	QQQ+ SRM Q3mz184	PC 28:0	% of total PC	%		1.27792	1.30679	1.3384	1.35426	1.42111	1.36694	1.21428	1.16557	1.21703	1.36336	1.38563	1.40317	0.6344	0.591856	0.613097	0.818422	0.828469	0.766849	1.63628	1.6858	1.6739	0.974176	1.02691	1.05456	0.899855	0.869513	0.869571	1.44814	1.47984	1.49304	0.654532	0.668307	0.885722	1.34967	1.32379	1.31673
Sum C30	PC		+H+					QQQ+ SRM Q3mz184	PC 28:0	% of total PC	%		3.47115	3.38439	3.54488	3.85354	3.61181	3.77502	3.85105	3.96388	4.02537	2.58538	2.65295	2.81486	5.57712	5.69353	5.70848	4.80272	4.86929	4.80429	2.48414	2.49049	2.58368	2.79037	3.17658	3.27525	4.16874	4.27523	4.40509	2.8097	2.73599	2.57705	4.21625	4.35966	4.25366	3.32061	3.42444	3.49099
Sum C32	PC		+H+					QQQ+ SRM Q3mz184	PC 28:0	% of total PC	%		15.2119	14.9224	15.1824	16.5813	16.5093	16.4912	16.7359	17.2075	17.0293	11.8449	12.0485	12.0545	18.2473	18.3001	18.4533	17.3583	17.3864	17.3766	11.9683	11.7785	11.4896	12.8296	12.9415	12.8052	15.5738	15.7138	15.683	13.6354	13.6424	13.4261	15.2872	15.0465	14.2612	14.7964	14.4581	14.784
Sum C34	PC		+H+					QQQ+ SRM Q3mz184	PC 28:0	% of total PC	%		39.5566	39.8533	39.6465	39.5105	39.547	39.4807	39.4737	39.1394	39.3134	37.6417	37.045	37.2061	40.3396	40.0632	39.8083	38.45	38.4252	38.9511	36.3282	36.5488	36.6704	38.8743	38.9636	38.2935	37.9857	38.4699	38.4531	37.384	37.5677	37.5403	37.434	37.627	37.6331	38.2767	38.1826	38.1699
Sum C36	PC		+H+					QQQ+ SRM Q3mz184	PC 28:0	% of total PC	%		27.5142	27.6953	27.296	26.5707	26.3965	26.6052	26.351	26.1295	26.1648	30.7509	30.8788	30.8235	25.7313	25.7735	25.7227	26.845	26.9134	26.8628	30.2837	30.0954	30.4323	29.993	29.2621	29.6422	27.3258	27.209	27.0976	27.8116	27.7783	27.9531	29.7397	29.6537	29.8121	26.297	27.1949	26.5647
Sum C38	PC		+H+					QQQ+ SRM Q3mz184	PC 28:0	% of total PC	%		12.1516	11.9644	12.1744	11.3699	11.6953	11.4741	11.6305	11.659	11.5097	14.7978	14.9004	14.6218	9.03353	9.1381	9.24306	11.0966	10.9852	10.648	16.1002	16.187	15.9493	13.7354	13.8169	14.1292	13.2785	12.737	12.7614	15.7103	15.6097	15.7797	12.0315	12.0116	12.4652	14.9182	14.4354	14.6895
Sum C40	PC		+H+					QQQ+ SRM Q3mz184	PC 28:0	% of total PC	%		2.09454	2.18025	2.15584	2.11403	2.24004	2.17381	1.95787	1.90076	1.95744	2.37928	2.47444	2.47929	1.0711	1.03146	1.06412	1.44739	1.42048	1.35716	2.83545	2.89981	2.87474	1.77742	1.83927	1.85458	1.66739	1.59508	1.59993	2.64908	2.66604	2.72368	1.29131	1.30158	1.57476	2.39105	2.30454	2.30094
Sum DB0	PC		+H+					QQQ+ SRM Q3mz184	PC 28:0	% of total PC	%		9.28052	9.28628	9.16123	9.85292	10.0386	9.8278	9.70372	9.98181	10.0161	8.24302	8.65891	8.59744	9.94661	10.0967	10.2799	11.3544	11.3507	11.082	9.11182	8.86842	8.85563	7.04456	7.0511	6.83954	11.2984	11.2304	11.3665	9.92758	9.84496	9.9614	7.04882	7.13865	7.86852	10.7642	10.1621	11.0321
Sum DB1	PC		+H+					QQQ+ SRM Q3mz184	PC 28:0	% of total PC	%		47.9284	48.1652	47.9052	47.5235	47.1164	47.2515	47.4015	47.2323	47.1031	48.4809	48.1378	48.5297	52.6617	52.3247	52.364	50.1648	50.0739	50.4311	47.6118	47.878	47.8869	50.5276	50.8824	50.5493	48.4935	49.0908	48.7951	48.516	48.4894	48.215	50.9669	51.0616	50.6001	46.4	46.5031	47.1223
Sum DB2	PC		+H+					QQQ+ SRM Q3mz184	PC 28:0	% of total PC	%		24.5237	24.2694	24.7716	25.0641	24.8916	25.1667	25.242	25.1387	25.1602	22.7826	22.449	22.4067	24.3594	24.6746	24.1596	23.4783	23.4732	23.7512	20.9378	20.9008	20.826	23.682	22.6695	22.9963	22.4858	22.6044	22.7023	19.3034	19.5369	19.3192	24.9377	24.9124	23.8437	21.1857	22.246	20.6599
Sum DB3	PC		+H+					QQQ+ SRM Q3mz184	PC 28:0	% of total PC	%		5.64631	5.59135	5.51238	5.54428	5.34062	5.48674	5.92313	5.77842	5.79946	5.89882	5.7847	5.7377	6.24818	6.16264	6.335	6.04174	5.97948	5.98225	5.14018	5.15199	5.07368	7.43507	7.59873	7.66103	6.80538	6.7286	6.84055	4.63169	4.50854	4.73018	8.77548	8.64501	8.40531	7.16495	7.18873	6.86343
Sum DB4	PC		+H+					QQQ+ SRM Q3mz184	PC 28:0	% of total PC	%		5.68223	5.68818	5.68438	5.38181	5.5878	5.52638	5.526	5.56981	5.55344	7.17281	7.40405	7.25989	3.62849	3.6497	3.67437	4.62105	4.79906	4.55406	8.58426	8.50387	8.6153	5.86155	6.10397	6.2703	5.83409	5.59282	5.56811	9.07412	9.08531	9.07951	4.59942	4.54077	4.84083	6.82339	6.58065	6.71576
Sum DB5	PC		+H+					QQQ+ SRM Q3mz184	PC 28:0	% of total PC	%		4.31791	4.33873	4.32653	4.00963	4.26727	4.11372	3.84436	3.97201	3.98539	4.88716	4.9986	4.94828	1.86819	1.86368	1.90717	2.77223	2.71875	2.67665	5.58605	5.57233	5.62749	3.52942	3.69693	3.67188	3.3753	3.13357	3.1334	5.72073	5.63595	5.77109	2.38956	2.37428	2.72122	4.87661	4.6925	4.79678
Sum DB6	PC		+H+					QQQ+ SRM Q3mz184	PC 28:0	% of total PC	%		2.62093	2.66081	2.63863	2.62376	2.75761	2.62721	2.35921	2.32701	2.38223	2.5347	2.56696	2.52032	1.28747	1.22796	1.27992	1.56759	1.60488	1.52279	3.02806	3.12462	3.11496	1.91986	1.99735	2.01163	1.70752	1.61945	1.59416	2.82641	2.89889	2.92366	1.28214	1.32724	1.72031	2.78512	2.62694	2.80976
Sum Total	PC		+H+					QQQ+ SRM Q3mz184	PC 28:0	% of total PC	%		100	100	100	100	100	100	100	100	100	100	100	100	100	100	100	100	100	100	100	100	100	100	100	100	100	100	100	100	100	100	100	100	100	100	100	100
PC O-30:0	PC O	C38H79N1O7P1	+H+	692.559	30	0	0	QQQ+ SRM Q3mz184	PC 28:0	Concentration	nmol/mg protein	0	0.166478	0.129849	0.157274	0.147293	0.130552	0.110457	0.120123	0.123025	0.183378	0.0519353	0.101739	0.0678039	0.260946	0.319471	0.214446	0.138305	0.161029	0.156035	0.104858	0.0764319	0.0642971	0.119688	0.113569	0.106401	0.100984	0.162064	0.106896	0.0706063	0.103375	0.0657592	0.154048	0.149066	0.108367	0.0777513	0.0495703	0.0431814
PC O-30:1	PC O	C38H77N1O7P1	+H+	690.543	30	1	0	QQQ+ SRM Q3mz184	PC 28:0	Concentration	nmol/mg protein	0.000253068	0.18625	0.144161	0.16588	0.15231	0.146628	0.115887	0.0822089	0.0698893	0.110777	0.0366441	0.0649383	0.0366763	0.109587	0.12797	0.100345	0.0641155	0.0705786	0.0702975	0.0583013	0.0507564	0.0404417	0.088766	0.0626754	0.0621238	0.041125	0.0688469	0.044342	0.0386669	0.0492735	0.029968	0.07254	0.0692013	0.0699046	0.0557647	0.0368259	0.0323813
PC O-32:0	PC O	C40H83N1O7P1	+H+	720.59	32	0	0	QQQ+ SRM Q3mz184	PC 28:0	Concentration	nmol/mg protein	0	1.75089	1.38377	1.579	1.4825	1.40281	1.16982	1.33196	1.26663	1.97948	0.592991	1.1157	0.681138	2.01533	2.45113	1.74373	1.25146	1.42143	1.39259	1.15373	0.852568	0.715338	1.0511	0.939476	0.877038	1.01408	1.66728	1.0854	0.930928	1.37352	0.874006	1.13027	1.01976	0.843343	0.846641	0.580346	0.555821
PC O-32:1	PC O	C40H81N1O7P1	+H+	718.575	32	1	0	QQQ+ SRM Q3mz184	PC 28:0	Concentration	nmol/mg protein	0	1.20916	0.98971	1.10762	1.06816	0.970859	0.818458	0.998166	0.90329	1.39262	0.492645	0.869616	0.59552	1.9918	2.42485	1.68554	1.0581	1.21976	1.21701	0.900884	0.666414	0.527506	1.64206	1.46124	1.37983	0.770141	1.32965	0.832016	0.696273	0.964444	0.64335	1.48831	1.29922	1.02458	0.714721	0.564285	0.510734
PC O-34:0	PC O	C42H87N1O7P1	+H+	748.621	34	0	0	QQQ+ SRM Q3mz184	PC 28:0	Concentration	nmol/mg protein	0	1.33698	1.08853	1.18647	1.06599	1.0207	0.846699	0.897659	0.83315	1.36189	0.601791	1.19257	0.745527	1.31353	1.60698	1.12538	0.902834	1.09748	0.962195	1.29188	0.894701	0.723187	1.15111	1.00667	0.891327	0.936443	1.49248	0.991791	0.906284	1.33828	0.830822	1.02496	0.940125	0.814549	0.95098	0.645742	0.605938
PC O-34:1	PC O	C42H85N1O7P1	+H+	746.606	34	1	0	QQQ+ SRM Q3mz184	PC 28:0	Concentration	nmol/mg protein	0	5.37811	4.28258	4.79284	4.31312	3.96211	3.35189	3.61665	3.3981	5.34314	2.25259	4.25503	2.63143	5.63026	6.73404	4.83208	3.44045	3.92367	3.63461	4.40151	3.20943	2.50331	4.8984	4.09038	3.92909	2.96622	4.98621	3.17033	3.2125	4.62296	3.05126	4.54146	4.06103	3.2865	2.84906	2.12013	1.91234
PC O-34:2	PC O	C42H83N1O7P1	+H+	744.59	34	2	0	QQQ+ SRM Q3mz184	PC 28:0	Concentration	nmol/mg protein	0	1.17439	0.921617	1.05417	1.02787	0.930085	0.816115	0.905557	0.811574	1.2745	0.541396	1.05378	0.662039	1.43824	1.72899	1.20955	0.817489	0.929005	0.93763	1.13384	0.85153	0.66906	1.83348	1.59105	1.51481	0.719448	1.19136	0.779691	0.775797	1.09481	0.703414	1.58979	1.40022	1.28177	0.94066	0.730026	0.643302
PC O-36:1	PC O	C44H89N1O7P1	+H+	774.637	36	1	0	QQQ+ SRM Q3mz184	PC 28:0	Concentration	nmol/mg protein	0	2.95097	2.39809	2.72156	2.31512	2.16887	1.78938	1.85218	1.68847	2.69909	1.69514	3.28595	1.97891	3.04639	3.52589	2.5395	2.18784	2.4281	2.19348	3.62742	2.69637	2.14634	3.05932	2.55632	2.25503	2.23451	3.61987	2.27062	2.35783	3.45956	2.27098	3.10488	2.74267	2.32758	2.07265	1.47896	1.32804
PC O-36:2	PC O	C44H87N1O7P1	+H+	772.621	36	2	0	QQQ+ SRM Q3mz184	PC 28:0	Concentration	nmol/mg protein	0	2.62693	2.09933	2.37832	2.11755	1.92022	1.64912	1.65132	1.56589	2.45947	1.15982	2.16969	1.35516	2.51559	2.97893	2.15615	1.66723	1.87721	1.71648	2.27656	1.66944	1.30929	2.4668	2.09541	1.94934	1.50294	2.55807	1.64858	1.55073	2.25433	1.45705	2.45043	2.16113	1.77472	1.45033	1.08222	0.912249
PC O-36:4	PC O	C44H83N1O7P1	+H+	768.59	36	4	0	QQQ+ SRM Q3mz184	PC 28:0	Concentration	nmol/mg protein	0	0.452732	0.371502	0.417191	0.340945	0.300756	0.267941	0.304524	0.294041	0.470093	0.186794	0.377996	0.227956	0.466289	0.555662	0.40423	0.271491	0.288787	0.299207	0.35013	0.260818	0.207441	1.19741	1.05046	1.01465	0.227334	0.390407	0.246054	0.234763	0.329763	0.221452	0.511296	0.446631	0.519623	0.310499	0.267729	0.237571
PC O-36:5	PC O	C44H81N1O7P1	+H+	766.575	36	5	0	QQQ+ SRM Q3mz184	PC 28:0	Concentration	nmol/mg protein	0.000119321	0.278873	0.238045	0.250379	0.22005	0.22251	0.170926	0.179459	0.155033	0.25917	0.269723	0.518694	0.313244	0.181169	0.215829	0.157475	0.156753	0.196074	0.173093	0.68985	0.531707	0.398997	1.02051	0.923	0.875081	0.225512	0.380335	0.238419	0.350105	0.521518	0.35327	0.269777	0.246536	0.310738	0.497162	0.358946	0.360456
PC O-38:4	PC O	C46H87N1O7P1	+H+	796.621	38	4	0	QQQ+ SRM Q3mz184	PC 28:0	Concentration	nmol/mg protein	0	0.605197	0.481735	0.586397	0.504168	0.480923	0.374852	0.432212	0.417713	0.636093	0.359589	0.715963	0.410952	0.716322	0.848717	0.6171	0.475482	0.519265	0.507725	0.724975	0.551151	0.421746	1.37197	1.17878	1.15741	0.486035	0.737244	0.494709	0.532571	0.762039	0.497462	0.865156	0.771569	0.771297	0.651771	0.457369	0.423511
PC O-38:5	PC O	C46H85N1O7P1	+H+	794.606	38	5	0	QQQ+ SRM Q3mz184	PC 28:0	Concentration	nmol/mg protein	0	0.710096	0.581036	0.670269	0.552031	0.515326	0.402474	0.474343	0.438692	0.724761	0.4097	0.782618	0.490958	0.641149	0.737735	0.548242	0.435003	0.475433	0.451263	0.886908	0.635623	0.502456	1.38941	1.24075	1.20848	0.380802	0.633943	0.396046	0.573049	0.797403	0.511894	0.673953	0.59721	0.717825	0.709541	0.552067	0.511694
Sum C30	PC O		+H+					QQQ+ SRM Q3mz184	PC 28:0	Concentration	nmol/mg protein	0.000253068	0.352729	0.27401	0.323154	0.299603	0.27718	0.226344	0.202332	0.192914	0.294155	0.0885794	0.166677	0.10448	0.370532	0.447441	0.314791	0.202421	0.231608	0.226333	0.16316	0.127188	0.104739	0.208454	0.176245	0.168525	0.142109	0.230911	0.151238	0.109273	0.152648	0.0957272	0.226588	0.218268	0.178271	0.133516	0.0863962	0.0755627
Sum C32	PC O		+H+					QQQ+ SRM Q3mz184	PC 28:0	Concentration	nmol/mg protein		2.96006	2.37348	2.68661	2.55066	2.37367	1.98828	2.33013	2.16992	3.3721	1.08564	1.98532	1.27666	4.00714	4.87598	3.42927	2.30956	2.64119	2.6096	2.05461	1.51898	1.24284	2.69315	2.40072	2.25687	1.78422	2.99692	1.91742	1.6272	2.33796	1.51736	2.61858	2.31898	1.86792	1.56136	1.14463	1.06656
Sum C34	PC O		+H+					QQQ+ SRM Q3mz184	PC 28:0	Concentration	nmol/mg protein		7.88949	6.29273	7.03349	6.40698	5.91289	5.0147	5.41986	5.04282	7.97952	3.39578	6.50139	4.039	8.38204	10.07	7.16701	5.16077	5.95016	5.53444	6.82722	4.95566	3.89556	7.88299	6.68809	6.33523	4.62211	7.67006	4.94182	4.89458	7.05605	4.5855	7.15621	6.40138	5.38283	4.7407	3.4959	3.16158
Sum C36	PC O		+H+					QQQ+ SRM Q3mz184	PC 28:0	Concentration	nmol/mg protein	0.000119321	6.30951	5.10696	5.76745	4.99367	4.61235	3.87737	3.98748	3.70343	5.88782	3.31148	6.35232	3.87527	6.20944	7.27631	5.25736	4.28331	4.79018	4.38226	6.94396	5.15834	4.06207	7.74404	6.62519	6.0941	4.1903	6.94868	4.40368	4.49342	6.56518	4.30276	6.33638	5.59696	4.93266	4.33064	3.18785	2.83832
Sum C38	PC O		+H+					QQQ+ SRM Q3mz184	PC 28:0	Concentration	nmol/mg protein		1.31529	1.06277	1.25667	1.0562	0.996249	0.777326	0.906555	0.856405	1.36085	0.769289	1.49858	0.90191	1.35747	1.58645	1.16534	0.910485	0.994697	0.958988	1.61188	1.18677	0.924202	2.76137	2.41952	2.36589	0.866838	1.37119	0.890755	1.10562	1.55944	1.00936	1.53911	1.36878	1.48912	1.36131	1.00944	0.935205
Sum DB0	PC O		+H+					QQQ+ SRM Q3mz184	PC 28:0	Concentration	nmol/mg protein		3.25436	2.60215	2.92274	2.69578	2.55406	2.12698	2.34975	2.22281	3.52475	1.24672	2.41002	1.49447	3.58981	4.37758	3.08355	2.2926	2.67994	2.51082	2.55046	1.8237	1.50282	2.32189	2.05971	1.87477	2.0515	3.32182	2.18409	1.90782	2.81517	1.77059	2.30927	2.10895	1.76626	1.87537	1.27566	1.20494
Sum DB1	PC O		+H+					QQQ+ SRM Q3mz184	PC 28:0	Concentration	nmol/mg protein	0.000253068	9.72449	7.81454	8.78789	7.84871	7.24847	6.07562	6.5492	6.05975	9.54562	4.47702	8.47554	5.24254	10.778	12.8128	9.15747	6.7505	7.64211	7.11541	8.98812	6.62297	5.2176	9.68855	8.17061	7.62608	6.012	10.0046	6.31731	6.30527	9.09624	5.99556	9.20718	8.17212	6.70857	5.69219	4.2002	3.7835
Sum DB2	PC O		+H+					QQQ+ SRM Q3mz184	PC 28:0	Concentration	nmol/mg protein		3.80133	3.02094	3.43249	3.14542	2.8503	2.46523	2.55687	2.37746	3.73397	1.70122	3.22347	2.01719	3.95383	4.70792	3.36571	2.48472	2.80622	2.65411	3.4104	2.52097	1.97835	4.30027	3.68646	3.46414	2.22238	3.74943	2.42827	2.32652	3.34915	2.16047	4.04022	3.56135	3.05649	2.39099	1.81224	1.55555
Sum DB4	PC O		+H+					QQQ+ SRM Q3mz184	PC 28:0	Concentration	nmol/mg protein		1.05793	0.853237	1.00359	0.845114	0.781679	0.642793	0.736736	0.711754	1.10619	0.546383	1.09396	0.638908	1.18261	1.40438	1.02133	0.746973	0.808051	0.806932	1.07511	0.811969	0.629187	2.56937	2.22924	2.17207	0.713369	1.12765	0.740763	0.767335	1.0918	0.718914	1.37645	1.2182	1.29092	0.962269	0.725097	0.661081
Sum DB5	PC O		+H+					QQQ+ SRM Q3mz184	PC 28:0	Concentration	nmol/mg protein	0.000119321	0.988969	0.819081	0.920648	0.77208	0.737836	0.5734	0.653802	0.593725	0.983931	0.679423	1.30131	0.804201	0.822318	0.953564	0.705718	0.591756	0.671506	0.624356	1.57676	1.16733	0.901453	2.40991	2.16375	2.08356	0.606314	1.01428	0.634465	0.923155	1.31892	0.865163	0.94373	0.843745	1.02856	1.2067	0.911013	0.87215
Sum Total	PC O		+H+					QQQ+ SRM Q3mz184	PC 28:0	Concentration	nmol/mg protein	0.00037239	18.8271	15.1099	17.0674	15.3071	14.1723	11.884	12.8464	11.9655	18.8944	8.65077	16.5043	10.1973	20.3266	24.2562	17.3338	12.8665	14.6078	13.7116	17.6008	12.9469	10.2294	21.29	18.3098	17.2206	11.6056	19.2178	12.3049	12.2301	17.6713	11.5107	17.8769	15.9044	13.8508	12.1275	8.92421	8.07722
PC O-30:0	PC O	C38H79N1O7P1	+H+	692.559	30	0	0	QQQ+ SRM Q3mz184	PC 28:0	% of total PC O	%	0	0.88425	0.859361	0.92149	0.962254	0.921173	0.929461	0.935073	1.02816	0.97054	0.600355	0.616441	0.664919	1.28376	1.31707	1.23715	1.07492	1.10235	1.13798	0.595758	0.590347	0.628551	0.562182	0.620266	0.61787	0.870132	0.843302	0.868727	0.577315	0.584988	0.571288	0.861716	0.937268	0.782386	0.641114	0.555459	0.534608
PC O-30:1	PC O	C38H77N1O7P1	+H+	690.543	30	1	0	QQQ+ SRM Q3mz184	PC 28:0	% of total PC O	%	67.9579	0.989269	0.954077	0.971915	0.995026	1.03461	0.975146	0.639939	0.58409	0.586294	0.423593	0.393463	0.359666	0.53913	0.527575	0.5789	0.498312	0.483156	0.512685	0.331241	0.392034	0.395348	0.416938	0.342306	0.360752	0.354356	0.358246	0.36036	0.316161	0.278834	0.260349	0.405776	0.435109	0.504697	0.459819	0.412651	0.400897
PC O-32:0	PC O	C40H83N1O7P1	+H+	720.59	32	0	0	QQQ+ SRM Q3mz184	PC 28:0	% of total PC O	%	0	9.29988	9.15799	9.25155	9.68506	9.89825	9.84364	10.3684	10.5857	10.4765	6.85478	6.76008	6.67959	9.91476	10.1051	10.0597	9.7265	9.73061	10.1563	6.55497	6.5851	6.99295	4.93704	5.13101	5.09295	8.73785	8.67571	8.82087	7.61178	7.77259	7.59299	6.32253	6.41183	6.08877	6.98115	6.50305	6.88134
PC O-32:1	PC O	C40H81N1O7P1	+H+	718.575	32	1	0	QQQ+ SRM Q3mz184	PC 28:0	% of total PC O	%	0	6.42246	6.55006	6.48967	6.97818	6.85038	6.88704	7.77003	7.54912	7.37051	5.69482	5.26903	5.83997	9.79899	9.99685	9.72401	8.22363	8.35004	8.87577	5.11841	5.14727	5.15676	7.7128	7.98067	8.01267	6.63596	6.91884	6.76166	5.69311	5.45769	5.58915	8.32532	8.16895	7.39726	5.89338	6.32308	6.32315
PC O-34:0	PC O	C42H87N1O7P1	+H+	748.621	34	0	0	QQQ+ SRM Q3mz184	PC 28:0	% of total PC O	%	0	7.1014	7.20408	6.9517	6.96401	7.20203	7.12468	6.98765	6.96294	7.20787	6.9565	7.22584	7.31101	6.46214	6.62504	6.49239	7.01691	7.51299	7.01737	7.33986	6.91052	7.06968	5.4068	5.49799	5.17593	8.06891	7.76616	8.06013	7.41027	7.57319	7.21783	5.73342	5.91111	5.88088	7.8415	7.23585	7.50181
PC O-34:1	PC O	C42H85N1O7P1	+H+	746.606	34	1	0	QQQ+ SRM Q3mz184	PC 28:0	% of total PC O	%	0	28.5658	28.3428	28.0819	28.1773	27.9566	28.205	28.1531	28.3992	28.2789	26.0392	25.7814	25.8052	27.6989	27.7621	27.8767	26.7395	26.86	26.5076	25.0074	24.7891	24.4717	23.008	22.3399	22.8162	25.5586	25.9458	25.7648	26.2672	26.1609	26.5081	25.4041	25.5341	23.7279	23.4925	23.7571	23.6757
PC O-34:2	PC O	C42H83N1O7P1	+H+	744.59	34	2	0	QQQ+ SRM Q3mz184	PC 28:0	% of total PC O	%	0	6.23778	6.0994	6.17654	6.71496	6.56267	6.86733	7.04913	6.78262	6.74534	6.25836	6.38489	6.49229	7.07567	7.12803	6.97801	6.3536	6.35964	6.83821	6.44196	6.57708	6.54055	8.61191	8.68961	8.79648	6.19916	6.19928	6.33643	6.34334	6.19544	6.11096	8.89301	8.80401	9.25414	7.7564	8.18029	7.9644
PC O-36:1	PC O	C44H89N1O7P1	+H+	774.637	36	1	0	QQQ+ SRM Q3mz184	PC 28:0	% of total PC O	%	0	15.6741	15.8709	15.946	15.1245	15.3035	15.0571	14.418	14.1111	14.2851	19.5953	19.9097	19.4062	14.9872	14.536	14.6506	17.0041	16.6219	15.9972	20.6094	20.8263	20.9821	14.3698	13.9615	13.095	19.2538	18.8361	18.453	19.2789	19.5773	19.7293	17.3681	17.2447	16.8047	17.0905	16.5724	16.4418
PC O-36:2	PC O	C44H87N1O7P1	+H+	772.621	36	2	0	QQQ+ SRM Q3mz184	PC 28:0	% of total PC O	%	0	13.953	13.8937	13.9349	13.8338	13.5491	13.8768	12.8544	13.0867	13.0169	13.4072	13.1462	13.2893	12.3758	12.2811	12.439	12.9579	12.8507	12.5184	12.9344	12.8945	12.7993	11.5866	11.4442	11.3198	12.9501	13.311	13.3978	12.6796	12.757	12.6583	13.7073	13.5883	12.8131	11.959	12.1267	11.2941
PC O-36:4	PC O	C44H83N1O7P1	+H+	768.59	36	4	0	QQQ+ SRM Q3mz184	PC 28:0	% of total PC O	%	0	2.40469	2.45866	2.44438	2.22737	2.12213	2.25463	2.37051	2.45741	2.48799	2.15927	2.29029	2.23545	2.29398	2.29081	2.33204	2.11005	1.97693	2.18214	1.98928	2.01452	2.02789	5.62428	5.73716	5.89209	1.95884	2.03149	1.99964	1.91955	1.86609	1.92388	2.8601	2.80823	3.75157	2.56028	3.00003	2.94124
PC O-36:5	PC O	C44H81N1O7P1	+H+	766.575	36	5	0	QQQ+ SRM Q3mz184	PC 28:0	% of total PC O	%	32.0421	1.48124	1.57542	1.46701	1.43757	1.57003	1.43829	1.39696	1.29567	1.37167	3.11791	3.14279	3.07183	0.891289	0.889789	0.908488	1.21829	1.34225	1.26238	3.91941	4.10681	3.90048	4.79337	5.04103	5.08159	1.94313	1.97908	1.93759	2.86265	2.95122	3.06906	1.50909	1.55011	2.24346	4.09945	4.02216	4.46263
PC O-38:4	PC O	C46H87N1O7P1	+H+	796.621	38	4	0	QQQ+ SRM Q3mz184	PC 28:0	% of total PC O	%	0	3.21451	3.1882	3.43578	3.29369	3.39339	3.15426	3.36447	3.49098	3.36656	4.15673	4.33804	4.03001	3.52406	3.49897	3.56011	3.69549	3.5547	3.70288	4.11898	4.257	4.12288	6.44418	6.43796	6.7211	4.18794	3.83626	4.02042	4.3546	4.3123	4.32174	4.83953	4.8513	5.56861	5.37431	5.12503	5.24327
PC O-38:5	PC O	C46H85N1O7P1	+H+	794.606	38	5	0	QQQ+ SRM Q3mz184	PC 28:0	% of total PC O	%	0	3.77168	3.84539	3.92719	3.60637	3.63614	3.38668	3.69243	3.66631	3.83584	4.736	4.7419	4.81458	3.15423	3.04143	3.16286	3.38088	3.25464	3.2911	5.03901	4.90945	4.91187	6.52609	6.77642	7.01763	3.2812	3.29874	3.2186	4.68557	4.51243	4.44711	3.76997	3.75501	5.18255	5.85066	6.18617	6.33503
Sum C30	PC O		+H+					QQQ+ SRM Q3mz184	PC 28:0	% of total PC O	%	67.9579	1.87352	1.81344	1.8934	1.95728	1.95578	1.90461	1.57501	1.61225	1.55683	1.02395	1.0099	1.02459	1.82289	1.84465	1.81605	1.57323	1.5855	1.65066	0.926999	0.982381	1.0239	0.979119	0.962571	0.978623	1.22449	1.20155	1.22909	0.893477	0.863822	0.831637	1.26749	1.37238	1.28708	1.10093	0.96811	0.935504
Sum C32	PC O		+H+					QQQ+ SRM Q3mz184	PC 28:0	% of total PC O	%	0	15.7223	15.708	15.7412	16.6632	16.7486	16.7307	18.1384	18.1348	17.847	12.5496	12.0291	12.5196	19.7137	20.102	19.7837	17.9501	18.0806	19.0321	11.6734	11.7324	12.1497	12.6498	13.1117	13.1056	15.3738	15.5945	15.5825	13.3049	13.2303	13.1821	14.6479	14.5808	13.486	12.8745	12.8261	13.2045
Sum C34	PC O		+H+					QQQ+ SRM Q3mz184	PC 28:0	% of total PC O	%	0	41.905	41.6463	41.2102	41.8562	41.7213	42.197	42.1899	42.1447	42.2321	39.2541	39.3921	39.6085	41.2367	41.5152	41.3471	40.11	40.7327	40.3631	38.7892	38.2767	38.0819	37.0267	36.5275	36.7886	39.8267	39.9113	40.1614	40.0208	39.9295	39.8369	40.0306	40.2492	38.8629	39.0904	39.1732	39.1419
Sum C36	PC O		+H+					QQQ+ SRM Q3mz184	PC 28:0	% of total PC O	%	32.0421	33.5129	33.7987	33.7922	32.6232	32.5447	32.6267	31.0398	30.9509	31.1616	38.2796	38.4889	38.0028	30.5483	29.9977	30.3302	33.2903	32.7918	31.9602	39.4524	39.8421	39.7097	36.3741	36.1839	35.3884	36.1059	36.1576	35.788	36.7407	37.1517	37.3805	35.4446	35.1914	35.6128	35.7092	35.7213	35.1398
Sum C38	PC O		+H+					QQQ+ SRM Q3mz184	PC 28:0	% of total PC O	%	0	6.98618	7.03358	7.36297	6.90005	7.02953	6.54094	7.05691	7.15729	7.2024	8.89273	9.07994	8.84458	6.67829	6.5404	6.72296	7.07637	6.80934	6.99398	9.15799	9.16644	9.03475	12.9703	13.2144	13.7387	7.46915	7.135	7.23903	9.04016	8.82473	8.76885	8.60951	8.60631	10.7512	11.225	11.3112	11.5783
Sum DB0	PC O		+H+					QQQ+ SRM Q3mz184	PC 28:0	% of total PC O	%	0	17.2855	17.2214	17.1247	17.6113	18.0214	17.8978	18.2911	18.5768	18.6549	14.4116	14.6024	14.6555	17.6607	18.0473	17.7893	17.8183	18.3459	18.3116	14.4906	14.086	14.6912	10.906	11.2493	10.8868	17.6769	17.2852	17.7497	15.5994	15.9308	15.3821	12.9177	13.2602	12.752	15.4638	14.2944	14.9178
Sum DB1	PC O		+H+					QQQ+ SRM Q3mz184	PC 28:0	% of total PC O	%	67.9579	51.6516	51.7178	51.4895	51.2749	51.1451	51.1243	50.981	50.6435	50.5208	51.7529	51.3535	51.411	53.0243	52.8226	52.8302	52.4655	52.3152	51.8932	51.0664	51.1547	51.0058	45.5075	44.6243	44.2846	51.8027	52.059	51.3398	51.5553	51.4747	52.0869	51.5034	51.3829	48.4345	46.9361	47.0652	46.8416
Sum DB2	PC O		+H+					QQQ+ SRM Q3mz184	PC 28:0	% of total PC O	%	0	20.1907	19.9931	20.1114	20.5487	20.1117	20.7441	19.9035	19.8693	19.7622	19.6655	19.5311	19.7816	19.4515	19.4091	19.417	19.3115	19.2104	19.3566	19.3763	19.4715	19.3399	20.1986	20.1338	20.1163	19.1493	19.5102	19.7342	19.0229	18.9525	18.7692	22.6003	22.3923	22.0672	19.7154	20.307	19.2585
Sum DB4	PC O		+H+					QQQ+ SRM Q3mz184	PC 28:0	% of total PC O	%	0	5.61919	5.64685	5.88016	5.52105	5.51552	5.40889	5.73498	5.94839	5.85456	6.316	6.62833	6.26546	5.81804	5.78978	5.89214	5.80554	5.53163	5.88502	6.10826	6.27151	6.15076	12.0685	12.1751	12.6132	6.14678	5.86775	6.02007	6.27415	6.1784	6.24562	7.69963	7.65954	9.32018	7.93459	8.12506	8.18452
Sum DB5	PC O		+H+					QQQ+ SRM Q3mz184	PC 28:0	% of total PC O	%	32.0421	5.25291	5.42081	5.3942	5.04393	5.20617	4.82497	5.0894	4.96197	5.20751	7.8539	7.88469	7.8864	4.04552	3.93122	4.07135	4.59918	4.59689	4.55348	8.95843	9.01626	8.81236	11.3195	11.8175	12.0992	5.22433	5.27782	5.1562	7.54822	7.46364	7.51617	5.27906	5.30512	7.42602	9.95011	10.2083	10.7977
Sum Total	PC O		+H+					QQQ+ SRM Q3mz184	PC 28:0	% of total PC O	%	100	100	100	100	100	100	100	100	100	100	100	100	100	100	100	100	100	100	100	100	100	100	100	100	100	100	100	100	100	100	100	100	100	100	100	100	100
SM 32:1	SM	C37H76N2O6P1	+H+	675.544	32	1	2	QQQ+ SRM Q3mz184	SM 30:1	Concentration	nmol/mg protein	0	0.527749	0.406444	0.456681	0.455268	0.420223	0.354658	0.325277	0.301091	0.496604	0.203714	0.368398	0.242635	0.782265	0.954195	0.68365	0.400016	0.477008	0.436875	0.459415	0.380739	0.335561	0.754158	0.764818	0.666722	0.499688	0.827759	0.533125	0.263234	0.372636	0.269435	0.793359	0.722831	0.651124	0.556685	0.436603	0.372635
SM 33:1	SM	C38H78N2O6P1	+H+	689.559	33	1	2	QQQ+ SRM Q3mz184	SM 30:1	Concentration	nmol/mg protein	0.000119372	0.376143	0.310008	0.332305	0.292285	0.283402	0.239029	0.241361	0.216648	0.3498	0.208359	0.409733	0.251341	0.335598	0.386185	0.285217	0.213737	0.256395	0.244266	0.480655	0.376216	0.305434	0.405107	0.383316	0.348509	0.258908	0.425871	0.275024	0.355268	0.496958	0.336621	0.389071	0.3499	0.316425	0.331732	0.254331	0.239639
SM 34:0	SM	C39H82N2O6P1	+H+	705.591	34	0	2	QQQ+ SRM Q3mz184	SM 30:1	Concentration	nmol/mg protein	0	1.21049	1.03668	1.09479	1.2994	1.1908	1.03715	0.936151	0.809692	1.28229	0.645693	1.26594	0.726424	1.34291	1.52668	1.14384	0.7496	0.854141	0.759337	1.76548	1.32366	0.96799	1.29346	1.25391	1.0307	0.767224	1.28953	0.830633	1.25532	1.81086	1.158	0.863496	0.769902	0.81016	0.860629	0.586966	0.591992
SM 34:1	SM	C39H80N2O6P1	+H+	703.575	34	1	2	QQQ+ SRM Q3mz184	SM 30:1	Concentration	nmol/mg protein	0	7.95009	6.3562	6.89484	6.76037	6.37942	5.26699	5.42068	4.80377	7.56628	4.80276	9.48592	5.78086	11.9329	13.8968	10.1068	7.02218	8.03718	7.38593	11.4519	8.6757	6.6307	15.3709	13.8983	12.1004	8.78995	14.2522	9.1438	8.23013	11.6859	7.83387	13.3285	11.8831	11.6675	10.7279	8.09916	7.81141
SM 34:2	SM	C39H78N2O6P1	+H+	701.559	34	2	2	QQQ+ SRM Q3mz184	SM 30:1	Concentration	nmol/mg protein	0	0.42951	0.355793	0.368298	0.355361	0.314191	0.281361	0.249214	0.228019	0.370038	0.164635	0.317016	0.196537	0.303497	0.363844	0.267618	0.160363	0.200322	0.183502	0.382588	0.316161	0.260993	0.341647	0.343028	0.295228	0.181035	0.297875	0.19551	0.200812	0.279382	0.21479	0.340065	0.306343	0.288686	0.308712	0.242349	0.224057
SM 35:0	SM	C40H84N2O6P1	+H+	719.606	35	0	2	QQQ+ SRM Q3mz184	SM 30:1	Concentration	nmol/mg protein	0	0.152467	0.142444	0.147876	0.168996	0.151511	0.131921	0.11831	0.0958387	0.151438	0.139162	0.295037	0.170201	0.29298	0.322741	0.252074	0.162494	0.206554	0.159279	0.466993	0.352034	0.246506	0.417625	0.36253	0.316464	0.274892	0.43747	0.298129	0.381539	0.498206	0.330192	0.333694	0.300385	0.29779	0.255584	0.196522	0.191145
SM 35:1	SM	C40H82N2O6P1	+H+	717.591	35	1	2	QQQ+ SRM Q3mz184	SM 30:1	Concentration	nmol/mg protein	0	0.422422	0.351945	0.38014	0.365926	0.329777	0.285209	0.273269	0.241751	0.379125	0.271539	0.558086	0.330671	0.401646	0.46445	0.349078	0.279166	0.322315	0.285344	0.712297	0.54052	0.408723	0.466428	0.448822	0.381204	0.320892	0.513795	0.32332	0.508548	0.743642	0.48426	0.638834	0.55714	0.53931	0.497897	0.362789	0.326691
SM 36:0	SM	C41H86N2O6P1	+H+	733.622	36	0	2	QQQ+ SRM Q3mz184	SM 30:1	Concentration	nmol/mg protein	0.000589146	0.057588	0.0228758	0.0379557	0.0244149	0.016829	0.0631714	0.0422976	0.0387902	0.0596069	0.0630303	0.081392	0.0520766	0.0311634	0.0452754	0.0292517	0.0248851	0.0189877	0.0091241	0.112351	0.106637	0.08607	0.0598564	0.0682791	0.0286782	0.0251106	0.0792216	0	0.121669	0.136297	0.115145	0.0637207	0.0541072	0.0483253	0.0780361	0.0426405	0.0389582
SM 36:1	SM	C41H84N2O6P1	+H+	731.606	36	1	2	QQQ+ SRM Q3mz184	SM 30:1	Concentration	nmol/mg protein	0	0.310076	0.256434	0.266529	0.2413	0.241083	0.186586	0.184291	0.164768	0.265715	0.212862	0.444349	0.256038	0.393277	0.456693	0.319835	0.292065	0.362631	0.304077	0.684693	0.466474	0.37264	0.659001	0.573771	0.492025	0.427648	0.696557	0.435656	0.501355	0.699654	0.456548	0.61477	0.521694	0.565149	0.597865	0.447358	0.434197
SM 36:2	SM	C41H82N2O6P1	+H+	729.591	36	2	2	QQQ+ SRM Q3mz184	SM 30:1	Concentration	nmol/mg protein	0	0.0789809	0.0654572	0.0719306	0.0728569	0.0667295	0.0525427	0.0543111	0.0516193	0.0789658	0.0390637	0.0748598	0.0503754	0.0635544	0.0795127	0.055569	0.048293	0.0592776	0.0522771	0.103036	0.0893835	0.0658077	0.0870782	0.0836289	0.0753118	0.0584241	0.102569	0.0620318	0.0811486	0.112874	0.0741558	0.0880733	0.0794473	0.0812806	0.111623	0.0882484	0.0857239
SM 38:0	SM	C43H90N2O6P1	+H+	761.653	38	0	2	QQQ+ SRM Q3mz184	SM 30:1	Concentration	nmol/mg protein	0	0.118538	0.040574	0.10548	0.135469	0.117323	0.112504	0.0880833	0.112605	0.0681869	0	0.202559	0.102353	0.0716602	0.18104	0.0585983	0.132433	0.136486	0.182646	0.223424	0.124424	0.110925	0.140701	0.116579	0.0347335	0.125741	0.147156	0.107441	0.147222	0.20409	0.0935836	0.0709967	0.086104	0.0865496	0.097167	0.0317272	0.099545
SM 38:1	SM	C43H88N2O6P1	+H+	759.637	38	1	2	QQQ+ SRM Q3mz184	SM 30:1	Concentration	nmol/mg protein	0.00102378	0.0518385	0.0712765	0.0342778	0.0404395	0.0186543	0.0147212	0.0071746	0.0262321	0.0361805	0.024705	0.0560919	0.0583102	0.0540539	0.0551897	0.0552735	0.0145252	0.00830548	0.0522956	0.11165	0.0607191	0.0763543	0.152895	0.114905	0.0837632	0.0243083	0.078238	0.0510295	0.0732046	0.136153	0.0369741	0.133382	0.0868966	0.0818378	0.0952379	0.0651828	0.0679276
SM 38:2	SM	C43H86N2O6P1	+H+	757.622	38	2	2	QQQ+ SRM Q3mz184	SM 30:1	Concentration	nmol/mg protein	0	0.00985851	0.00499198	0.0148465	0.0116251	0.00523266	0.0125813	0.000601686	0.00850156	0.00757195	0.000851541	0.00650098	0.00608444	0.0179267	0.0235624	0.0177386	0.0158779	0.0103456	0.00929847	0.0191493	0.00793508	0.0121793	0.0289247	0.0231036	0.022928	0.0115421	0.0145371	0.00558175	0.0131992	0.0173919	0.0175301	0.0203177	0.0236455	0.0349755	0.0185756	0.0226728	0.00449069
SM 40:0	SM	C45H94N2O6P1	+H+	789.684	40	0	2	QQQ+ SRM Q3mz184	SM 30:1	Concentration	nmol/mg protein	0	0.133579	0.121095	0.150634	0.120536	0.162291	0.12698	0.0817279	0.0632574	0.104753	0.0830717	0.202485	0.0811159	0.170528	0.127935	0.115444	0.0936634	0.0476453	0.10627	0.286296	0.169278	0.162016	0.183634	0.19485	0.145355	0.103125	0.157831	0.116148	0.138185	0.30704	0.118087	0.168698	0.0944904	0.120339	0.103024	0.0520502	0.0211099
SM 40:1	SM	C45H92N2O6P1	+H+	787.669	40	1	2	QQQ+ SRM Q3mz184	SM 30:1	Concentration	nmol/mg protein	0	0.657314	0.602345	0.446147	0.620794	0.426622	0.432521	0.348307	0.403484	0.550237	0.34888	0.603188	0.381897	0.929629	1.03494	0.726396	0.408256	0.498484	0.498316	0.733298	0.605645	0.500378	1.10921	1.15697	0.971491	0.449235	0.792517	0.532329	0.516322	0.758614	0.501582	1.23281	0.99771	1.26142	0.763148	0.507811	0.530423
SM 40:2	SM	C45H90N2O6P1	+H+	785.653	40	2	2	QQQ+ SRM Q3mz184	SM 30:1	Concentration	nmol/mg protein	0.000144667	0.151893	0.143661	0.12969	0.149713	0.155101	0.104808	0.113936	0.0980109	0.166523	0.0917562	0.171397	0.098973	0.227322	0.259237	0.193255	0.11459	0.141714	0.148975	0.213095	0.152102	0.103475	0.317799	0.265583	0.2288	0.133377	0.22155	0.156853	0.152389	0.193183	0.116188	0.251502	0.23427	0.261933	0.207451	0.135627	0.136835
SM 40:3	SM	C45H88N2O6P1	+H+	783.637	40	3	2	QQQ+ SRM Q3mz184	SM 30:1	Concentration	nmol/mg protein	0	0.0147056	0.0105972	0.0312409	0.0082955	0.0202631	0.010024	0	0.0031508	0.0216074	0.00777439	0.014437	0.00540139	0.00511931	0.0182376	0.0143163	0.0223514	0.0059019	0.0118778	0.0227231	0.0133877	0.00424859	0.0210348	0.0150705	0.01114	0.00962487	0.0106834	0.00689617	0.0186011	0.038206	0.0181099	0.00129998	0.00932684	0.00954989	0.00966967	0.00530733	0
SM 42:1	SM	C47H96N2O6P1	+H+	815.7	42	1	2	QQQ+ SRM Q3mz184	SM 30:1	Concentration	nmol/mg protein	0	1.67219	1.38229	1.4296	1.63597	1.46654	1.26628	1.1221	0.993683	1.61199	0.885846	1.82133	1.04509	2.57494	2.96491	2.10401	1.26457	1.45749	1.29317	2.09072	1.5288	1.20355	3.06234	2.85329	2.55279	1.30468	2.13297	1.35685	1.46175	2.08198	1.38082	3.0192	2.64869	2.86972	1.65562	1.17506	1.18012
SM 42:2	SM	C47H94N2O6P1	+H+	813.684	42	2	2	QQQ+ SRM Q3mz184	SM 30:1	Concentration	nmol/mg protein	0	1.75302	1.44414	1.53447	1.67091	1.59752	1.30839	1.24121	1.10588	1.77604	1.08231	2.17096	1.26816	3.35871	3.81955	2.81166	1.74621	1.96001	1.83707	2.86001	2.0584	1.61791	4.11732	3.69744	3.31459	2.305	3.83302	2.39689	2.23096	3.26622	2.08019	3.81394	3.37475	3.54177	2.76623	2.06818	1.97499
SM 42:3	SM	C47H92N2O6P1	+H+	811.669	42	3	2	QQQ+ SRM Q3mz184	SM 30:1	Concentration	nmol/mg protein	0	0.250061	0.216191	0.249203	0.277032	0.259248	0.19707	0.178952	0.171364	0.253574	0.135561	0.285828	0.155687	0.36041	0.456148	0.320061	0.207562	0.225779	0.2048	0.294117	0.235208	0.200659	0.387722	0.315862	0.293823	0.167378	0.294542	0.175412	0.18573	0.307272	0.186885	0.367865	0.340144	0.315987	0.265659	0.202274	0.187058
SM 42:4	SM	C47H90N2O6P1	+H+	809.653	42	4	2	QQQ+ SRM Q3mz184	SM 30:1	Concentration	nmol/mg protein	0.000190003	0.0474829	0.0456675	0.035122	0.0387516	0.0547767	0.0299111	0.0459812	0.0242962	0.0359677	0.0110028	0.0259382	0.0252902	0.0360546	0.0429806	0.0249772	0.0265112	0.0387666	0.00957628	0.0462081	0.023181	0.0291509	0.0285391	0.0235749	0.0414353	0.0273467	0.0319026	0.0252961	0.0283851	0.049309	0.0311194	0.0334379	0.0385384	0.0240087	0.0229932	0.023982	0.0278767
Sum C32	SM		+H+					QQQ+ SRM Q3mz184	SM 30:1	Concentration	nmol/mg protein		0.527749	0.406444	0.456681	0.455268	0.420223	0.354658	0.325277	0.301091	0.496604	0.203714	0.368398	0.242635	0.782265	0.954195	0.68365	0.400016	0.477008	0.436875	0.459415	0.380739	0.335561	0.754158	0.764818	0.666722	0.499688	0.827759	0.533125	0.263234	0.372636	0.269435	0.793359	0.722831	0.651124	0.556685	0.436603	0.372635
Sum C33	SM		+H+					QQQ+ SRM Q3mz184	SM 30:1	Concentration	nmol/mg protein	0.000119372	0.376143	0.310008	0.332305	0.292285	0.283402	0.239029	0.241361	0.216648	0.3498	0.208359	0.409733	0.251341	0.335598	0.386185	0.285217	0.213737	0.256395	0.244266	0.480655	0.376216	0.305434	0.405107	0.383316	0.348509	0.258908	0.425871	0.275024	0.355268	0.496958	0.336621	0.389071	0.3499	0.316425	0.331732	0.254331	0.239639
Sum C34	SM		+H+					QQQ+ SRM Q3mz184	SM 30:1	Concentration	nmol/mg protein		9.59009	7.74867	8.35793	8.41513	7.8844	6.5855	6.60605	5.84148	9.21861	5.61309	11.0689	6.70382	13.5793	15.7873	11.5182	7.93214	9.09165	8.32877	13.5999	10.3155	7.85968	17.006	15.4953	13.4263	9.73821	15.8396	10.1699	9.68626	13.7762	9.20666	14.5321	12.9594	12.7664	11.8972	8.92847	8.62746
Sum C35	SM		+H+					QQQ+ SRM Q3mz184	SM 30:1	Concentration	nmol/mg protein		0.574889	0.494389	0.528016	0.534922	0.481288	0.417129	0.391579	0.337589	0.530563	0.4107	0.853123	0.500872	0.694626	0.787191	0.601152	0.44166	0.528868	0.444624	1.17929	0.892554	0.655229	0.884053	0.811352	0.697668	0.595783	0.951265	0.62145	0.890087	1.24185	0.814452	0.972527	0.857524	0.8371	0.753481	0.559311	0.517836
Sum C36	SM		+H+					QQQ+ SRM Q3mz184	SM 30:1	Concentration	nmol/mg protein	0.000589146	0.446644	0.344767	0.376415	0.338572	0.324641	0.3023	0.2809	0.255177	0.404288	0.314956	0.6006	0.35849	0.487995	0.581482	0.404656	0.365243	0.440896	0.365479	0.90008	0.662494	0.524518	0.805936	0.725679	0.596015	0.511183	0.878348	0.497687	0.704172	0.948825	0.645849	0.766564	0.655249	0.694755	0.787524	0.578247	0.558879
Sum C38	SM		+H+					QQQ+ SRM Q3mz184	SM 30:1	Concentration	nmol/mg protein	0.00102378	0.180235	0.116843	0.154604	0.187533	0.14121	0.139807	0.0958596	0.147339	0.111939	0.0255565	0.265152	0.166748	0.143641	0.259792	0.13161	0.162836	0.155137	0.24424	0.354223	0.193078	0.199458	0.32252	0.254588	0.141425	0.161592	0.239931	0.164052	0.233625	0.357635	0.148088	0.224697	0.196646	0.203363	0.210981	0.119583	0.171963
Sum C40	SM		+H+					QQQ+ SRM Q3mz184	SM 30:1	Concentration	nmol/mg protein	0.000144667	0.957493	0.877698	0.757712	0.899339	0.764276	0.674333	0.54397	0.567903	0.84312	0.531482	0.991507	0.567388	1.3326	1.44035	1.04941	0.638861	0.693745	0.765439	1.25541	0.940413	0.770119	1.63168	1.63248	1.35679	0.695361	1.18258	0.812226	0.825496	1.29704	0.753967	1.65431	1.3358	1.65325	1.08329	0.700796	0.688368
Sum C42	SM		+H+					QQQ+ SRM Q3mz184	SM 30:1	Concentration	nmol/mg protein	0.000190003	3.72275	3.08828	3.2484	3.62267	3.37809	2.80166	2.58824	2.29522	3.67756	2.11472	4.30406	2.49423	6.33012	7.28358	5.2607	3.24486	3.68205	3.34462	5.29106	3.8456	3.05127	7.59592	6.89017	6.20264	3.8044	6.29243	3.95445	3.90682	5.70478	3.67901	7.23445	6.40213	6.75149	4.7105	3.4695	3.37004
Sum DB0	SM		+H+					QQQ+ SRM Q3mz184	SM 30:1	Concentration	nmol/mg protein	0.000589146	1.67266	1.36367	1.53674	1.74882	1.63875	1.47173	1.26657	1.12018	1.66627	0.930956	2.04741	1.13217	1.90924	2.20367	1.59921	1.16308	1.26381	1.21666	2.85454	2.07603	1.57351	2.09527	1.99615	1.55593	1.29609	2.11121	1.35235	2.04393	2.95649	1.81501	1.5006	1.30499	1.36316	1.39444	0.909907	0.94275
Sum DB1	SM		+H+					QQQ+ SRM Q3mz184	SM 30:1	Concentration	nmol/mg protein	0.00114315	11.9678	9.73694	10.2405	10.4124	9.56572	8.04599	7.92246	7.15143	11.2559	6.95867	13.7471	8.34684	17.4043	20.2133	14.6302	9.89451	11.4198	10.5003	16.7246	12.6348	9.83335	21.9801	20.1942	17.5969	12.0753	19.7199	12.6511	11.9098	16.9756	11.3001	20.15	17.768	17.9525	15.2261	11.3483	10.963
Sum DB2	SM		+H+					QQQ+ SRM Q3mz184	SM 30:1	Concentration	nmol/mg protein	0.000144667	2.42326	2.01404	2.11923	2.26047	2.13877	1.75969	1.65927	1.49203	2.39914	1.37862	2.74073	1.62013	3.97101	4.5457	3.34584	2.08534	2.37167	2.23113	3.57788	2.62399	2.06037	4.89277	4.41279	3.93686	2.68938	4.46955	2.81686	2.67851	3.86905	2.50285	4.5139	4.01846	4.20865	3.41259	2.55708	2.42609
Sum DB3	SM		+H+					QQQ+ SRM Q3mz184	SM 30:1	Concentration	nmol/mg protein		0.264767	0.226788	0.280444	0.285328	0.279511	0.207094	0.178952	0.174515	0.275181	0.143335	0.300265	0.161089	0.365529	0.474386	0.334377	0.229913	0.231681	0.216678	0.31684	0.248596	0.204908	0.408757	0.330932	0.304963	0.177003	0.305226	0.182308	0.204331	0.345478	0.204995	0.369165	0.349471	0.325537	0.275328	0.207581	0.187058
Sum DB4	SM		+H+					QQQ+ SRM Q3mz184	SM 30:1	Concentration	nmol/mg protein	0.000190003	0.0474829	0.0456675	0.035122	0.0387516	0.0547767	0.0299111	0.0459812	0.0242962	0.0359677	0.0110028	0.0259382	0.0252902	0.0360546	0.0429806	0.0249772	0.0265112	0.0387666	0.00957628	0.0462081	0.023181	0.0291509	0.0285391	0.0235749	0.0414353	0.0273467	0.0319026	0.0252961	0.0283851	0.049309	0.0311194	0.0334379	0.0385384	0.0240087	0.0229932	0.023982	0.0278767
Sum Total	SM		+H+					QQQ+ SRM Q3mz184	SM 30:1	Concentration	nmol/mg protein	0.00206697	16.376	13.3871	14.2121	14.7457	13.6775	11.5144	11.0732	9.96245	15.6325	9.42258	18.8614	11.2855	23.6861	27.4801	19.9346	13.3993	15.3257	14.1743	23.5201	17.6066	13.7013	29.4054	26.9577	23.4361	16.2651	26.6378	17.028	16.865	24.1959	15.8541	26.5671	23.4795	23.8739	20.3314	15.0468	14.5468
SM 32:1	SM	C37H76N2O6P1	+H+	675.544	32	1	2	QQQ+ SRM Q3mz184	SM 30:1	% of total SM	%	0	3.2227	3.03609	3.21333	3.08745	3.07236	3.08012	2.93751	3.02226	3.17674	2.16197	1.95318	2.14997	3.30263	3.47231	3.42946	2.98534	3.11246	3.08216	1.95329	2.16248	2.44912	2.56469	2.83711	2.84485	3.07214	3.10746	3.13088	1.56084	1.54008	1.69947	2.98625	3.07857	2.72735	2.73805	2.90162	2.56162
SM 33:1	SM	C38H78N2O6P1	+H+	689.559	33	1	2	QQQ+ SRM Q3mz184	SM 30:1	% of total SM	%	5.77524	2.29691	2.31572	2.33819	1.98216	2.07203	2.07591	2.17968	2.17465	2.23765	2.21127	2.17233	2.22711	1.41686	1.40533	1.43076	1.59513	1.67297	1.7233	2.04359	2.13679	2.22924	1.37766	1.42192	1.48706	1.5918	1.59875	1.61513	2.10654	2.05389	2.12324	1.46449	1.49024	1.3254	1.63163	1.69026	1.64736
SM 34:0	SM	C39H82N2O6P1	+H+	705.591	34	0	2	QQQ+ SRM Q3mz184	SM 30:1	% of total SM	%	0	7.39186	7.74386	7.70327	8.81204	8.70623	9.00742	8.45418	8.12743	8.2027	6.85261	6.7118	6.43678	5.66962	5.55558	5.73798	5.5943	5.57324	5.35714	7.50625	7.51794	7.06496	4.3987	4.65141	4.39791	4.71699	4.84099	4.87806	7.44336	7.48417	7.30414	3.25025	3.27904	3.3935	4.233	3.90093	4.06957
SM 34:1	SM	C39H80N2O6P1	+H+	703.575	34	1	2	QQQ+ SRM Q3mz184	SM 30:1	% of total SM	%	0	48.5472	47.48	48.514	45.8463	46.6416	45.7426	48.953	48.2188	48.401	50.9708	50.2926	51.2237	50.3792	50.5704	50.6995	52.4069	52.4424	52.1079	48.6898	49.2753	48.3948	52.2725	51.5561	51.6315	54.0417	53.5037	53.6988	48.8001	48.2972	49.4123	50.1694	50.6108	48.8716	52.765	53.8263	53.6984
SM 34:2	SM	C39H78N2O6P1	+H+	701.559	34	2	2	QQQ+ SRM Q3mz184	SM 30:1	% of total SM	%	0	2.6228	2.65773	2.59144	2.40993	2.29714	2.44356	2.2506	2.28879	2.36711	1.74724	1.68076	1.74149	1.28133	1.32403	1.34248	1.1968	1.30709	1.29461	1.62664	1.79569	1.90488	1.16185	1.27247	1.25972	1.11303	1.11824	1.14817	1.1907	1.15467	1.35479	1.28002	1.30473	1.20921	1.5184	1.61063	1.54025
SM 35:0	SM	C40H84N2O6P1	+H+	719.606	35	0	2	QQQ+ SRM Q3mz184	SM 30:1	% of total SM	%	0	0.93104	1.06404	1.0405	1.14607	1.10774	1.1457	1.06843	0.961999	0.968737	1.4769	1.56423	1.50814	1.23693	1.17445	1.2645	1.2127	1.34776	1.12372	1.98551	1.99944	1.79914	1.42023	1.34481	1.35033	1.69007	1.64229	1.75082	2.26232	2.05905	2.08269	1.25604	1.27935	1.24734	1.25709	1.30607	1.314
SM 35:1	SM	C40H82N2O6P1	+H+	717.591	35	1	2	QQQ+ SRM Q3mz184	SM 30:1	% of total SM	%	0	2.57952	2.62898	2.67477	2.48158	2.41108	2.47697	2.46783	2.42662	2.42524	2.88179	2.95887	2.93004	1.6957	1.69013	1.75112	2.08343	2.10309	2.01311	3.02846	3.06999	2.9831	1.5862	1.66491	1.62657	1.97288	1.92882	1.89876	3.01541	3.07342	3.05448	2.40461	2.37288	2.259	2.44891	2.41106	2.24579
SM 36:0	SM	C41H86N2O6P1	+H+	733.622	36	0	2	QQQ+ SRM Q3mz184	SM 30:1	% of total SM	%	28.5029	0.351661	0.17088	0.267067	0.165573	0.123041	0.548629	0.38198	0.389365	0.381302	0.668928	0.431526	0.461446	0.131568	0.164757	0.146738	0.185719	0.123894	0.0643706	0.477679	0.605664	0.628189	0.203556	0.253283	0.122368	0.154383	0.297403	0	0.72143	0.563305	0.726277	0.239848	0.230445	0.202419	0.38382	0.283385	0.267812
SM 36:1	SM	C41H84N2O6P1	+H+	731.606	36	1	2	QQQ+ SRM Q3mz184	SM 30:1	% of total SM	%	0	1.89348	1.91553	1.87537	1.63641	1.76262	1.62045	1.66429	1.65389	1.69976	2.25906	2.35586	2.26873	1.66037	1.66191	1.60442	2.1797	2.36615	2.14527	2.9111	2.64942	2.71975	2.24109	2.12842	2.09943	2.62924	2.61492	2.55847	2.97276	2.89162	2.87969	2.31403	2.22192	2.36723	2.9406	2.9731	2.98482
SM 36:2	SM	C41H82N2O6P1	+H+	729.591	36	2	2	QQQ+ SRM Q3mz184	SM 30:1	% of total SM	%	0	0.482297	0.488957	0.506124	0.494088	0.487877	0.456321	0.490472	0.518139	0.505139	0.414575	0.396893	0.446372	0.268319	0.289347	0.278756	0.360413	0.386785	0.368816	0.438078	0.50767	0.480303	0.29613	0.310223	0.32135	0.359198	0.385051	0.364294	0.481167	0.466502	0.46774	0.331513	0.338369	0.340458	0.549016	0.586491	0.589296
SM 38:0	SM	C43H90N2O6P1	+H+	761.653	38	0	2	QQQ+ SRM Q3mz184	SM 30:1	% of total SM	%	0	0.723854	0.303083	0.742184	0.918698	0.85778	0.977074	0.795461	1.1303	0.436187	0	1.07393	0.906944	0.302541	0.658805	0.293952	0.988354	0.890568	1.28857	0.949927	0.70669	0.809595	0.478485	0.432452	0.148205	0.773073	0.552434	0.630968	0.872944	0.843488	0.590281	0.267236	0.366721	0.362528	0.477916	0.210856	0.684307
SM 38:1	SM	C43H88N2O6P1	+H+	759.637	38	1	2	QQQ+ SRM Q3mz184	SM 30:1	% of total SM	%	49.5306	0.316552	0.532427	0.241188	0.274245	0.136387	0.12785	0.0647922	0.26331	0.231444	0.262189	0.297389	0.516682	0.228209	0.200835	0.277274	0.108402	0.054193	0.368946	0.4747	0.344865	0.557279	0.519955	0.426244	0.357411	0.14945	0.293711	0.299681	0.434063	0.562712	0.233215	0.502059	0.370096	0.342792	0.468427	0.433199	0.466959
SM 38:2	SM	C43H86N2O6P1	+H+	757.622	38	2	2	QQQ+ SRM Q3mz184	SM 30:1	% of total SM	%	0	0.060201	0.0372895	0.104464	0.0788374	0.0382574	0.109266	0.00543369	0.0853361	0.0484373	0.00903724	0.034467	0.0539136	0.0756845	0.0857434	0.0889837	0.118498	0.0675048	0.0656008	0.0814168	0.0450687	0.0888917	0.0983652	0.0857034	0.097832	0.0709623	0.0545731	0.0327799	0.0782643	0.0718797	0.110572	0.0764771	0.100707	0.146501	0.0913642	0.150682	0.0308706
SM 40:0	SM	C45H94N2O6P1	+H+	789.684	40	0	2	QQQ+ SRM Q3mz184	SM 30:1	% of total SM	%	0	0.815703	0.904565	1.0599	0.817432	1.18655	1.10279	0.738067	0.634958	0.670101	0.881624	1.07354	0.71876	0.719949	0.465557	0.579112	0.699015	0.310884	0.749738	1.21724	0.961446	1.18249	0.624491	0.722799	0.62022	0.634026	0.592508	0.6821	0.819359	1.26898	0.74484	0.634988	0.402439	0.504062	0.506722	0.345921	0.145117
SM 40:1	SM	C45H92N2O6P1	+H+	787.669	40	1	2	QQQ+ SRM Q3mz184	SM 30:1	% of total SM	%	0	4.01389	4.49944	3.13921	4.20999	3.11914	3.75634	3.14548	4.05005	3.51983	3.70259	3.198	3.38396	3.92479	3.76614	3.64389	3.04683	3.25259	3.51563	3.11775	3.43987	3.65206	3.77213	4.29182	4.14528	2.76195	2.97516	3.12621	3.06151	3.1353	3.16374	4.64038	4.24929	5.2837	3.75354	3.37487	3.64631
SM 40:2	SM	C45H90N2O6P1	+H+	785.653	40	2	2	QQQ+ SRM Q3mz184	SM 30:1	% of total SM	%	6.99897	0.927537	1.07313	0.912535	1.0153	1.13398	0.910232	1.02893	0.983803	1.06523	0.97379	0.908718	0.876991	0.959728	0.943363	0.969446	0.855193	0.924677	1.05102	0.906015	0.863893	0.755225	1.08075	0.985186	0.976273	0.820016	0.831715	0.921152	0.903582	0.798413	0.732861	0.946667	0.997767	1.09715	1.02035	0.901365	0.940651
SM 40:3	SM	C45H88N2O6P1	+H+	783.637	40	3	2	QQQ+ SRM Q3mz184	SM 30:1	% of total SM	%	0	0.0897998	0.0791601	0.21982	0.056257	0.148149	0.0870563	0	0.0316267	0.138221	0.0825081	0.0765425	0.0478612	0.0216131	0.0663668	0.0718165	0.16681	0.0385097	0.083798	0.0966116	0.0760379	0.0310087	0.0715339	0.0559042	0.0475337	0.0591749	0.0401063	0.0404991	0.110294	0.157903	0.114228	0.00489321	0.0397234	0.0400014	0.0475602	0.035272	0
SM 42:1	SM	C47H96N2O6P1	+H+	815.7	42	1	2	QQQ+ SRM Q3mz184	SM 30:1	% of total SM	%	0	10.2112	10.3255	10.0591	11.0946	10.7223	10.9974	10.1334	9.97428	10.3118	9.4013	9.65639	9.26041	10.8711	10.7893	10.5545	9.43755	9.5101	9.12332	8.8891	8.68312	8.78425	10.4142	10.5843	10.8926	8.02131	8.00729	7.96838	8.66736	8.6047	8.70954	11.3644	11.2809	12.0203	8.14317	7.80937	8.11257
SM 42:2	SM	C47H94N2O6P1	+H+	813.684	42	2	2	QQQ+ SRM Q3mz184	SM 30:1	% of total SM	%	0	10.7048	10.7875	10.7969	11.3315	11.6799	11.3631	11.2091	11.1005	11.3612	11.4864	11.51	11.2371	14.1801	13.8993	14.1044	13.0321	12.789	12.9606	12.1599	11.6911	11.8085	14.0019	13.7157	14.1431	14.1714	14.3894	14.0762	13.2284	13.499	13.1208	14.3559	14.3732	14.8353	13.6057	13.7449	13.5767
SM 42:3	SM	C47H92N2O6P1	+H+	811.669	42	3	2	QQQ+ SRM Q3mz184	SM 30:1	% of total SM	%	0	1.527	1.61492	1.75346	1.87873	1.89543	1.71151	1.61608	1.7201	1.62209	1.43868	1.51541	1.37953	1.52161	1.65992	1.60555	1.54904	1.4732	1.44487	1.25049	1.33591	1.46453	1.31854	1.1717	1.25372	1.02906	1.10573	1.03014	1.10128	1.26994	1.17878	1.38466	1.44869	1.32357	1.30664	1.3443	1.2859
SM 42:4	SM	C47H90N2O6P1	+H+	809.653	42	4	2	QQQ+ SRM Q3mz184	SM 30:1	% of total SM	%	9.19236	0.289954	0.341131	0.247128	0.262799	0.400487	0.259771	0.415246	0.243877	0.230083	0.116771	0.13752	0.224094	0.152218	0.156406	0.125296	0.197855	0.252951	0.0675608	0.196462	0.13166	0.21276	0.0970539	0.0874515	0.176801	0.168131	0.119764	0.148556	0.168308	0.203791	0.196287	0.125862	0.164137	0.100565	0.113092	0.159382	0.191634
Sum C32	SM		+H+					QQQ+ SRM Q3mz184	SM 30:1	% of total SM	%	0	3.2227	3.03609	3.21333	3.08745	3.07236	3.08012	2.93751	3.02226	3.17674	2.16197	1.95318	2.14997	3.30263	3.47231	3.42946	2.98534	3.11246	3.08216	1.95329	2.16248	2.44912	2.56469	2.83711	2.84485	3.07214	3.10746	3.13088	1.56084	1.54008	1.69947	2.98625	3.07857	2.72735	2.73805	2.90162	2.56162
Sum C33	SM		+H+					QQQ+ SRM Q3mz184	SM 30:1	% of total SM	%	5.77524	2.29691	2.31572	2.33819	1.98216	2.07203	2.07591	2.17968	2.17465	2.23765	2.21127	2.17233	2.22711	1.41686	1.40533	1.43076	1.59513	1.67297	1.7233	2.04359	2.13679	2.22924	1.37766	1.42192	1.48706	1.5918	1.59875	1.61513	2.10654	2.05389	2.12324	1.46449	1.49024	1.3254	1.63163	1.69026	1.64736
Sum C34	SM		+H+					QQQ+ SRM Q3mz184	SM 30:1	% of total SM	%	0	58.5619	57.8816	58.8087	57.0683	57.6449	57.1936	59.6578	58.635	58.9708	59.5706	58.6852	59.4019	57.3301	57.45	57.78	59.198	59.3227	58.7596	57.8227	58.5889	57.3646	57.833	57.48	57.2891	59.8717	59.4629	59.725	57.4342	56.936	58.0712	54.6996	55.1946	53.4743	58.5164	59.3379	59.3082
Sum C35	SM		+H+					QQQ+ SRM Q3mz184	SM 30:1	% of total SM	%	0	3.51056	3.69302	3.71527	3.62764	3.51882	3.62267	3.53626	3.38862	3.39398	4.35868	4.52311	4.43818	2.93263	2.86459	3.01562	3.29613	3.45085	3.13683	5.01397	5.06943	4.78225	3.00643	3.00973	2.9769	3.66295	3.57111	3.64959	5.27773	5.13247	5.13717	3.66065	3.65223	3.50634	3.70599	3.71713	3.55979
Sum C36	SM		+H+					QQQ+ SRM Q3mz184	SM 30:1	% of total SM	%	28.5029	2.72743	2.57536	2.64856	2.29607	2.37354	2.6254	2.53675	2.56139	2.5862	3.34256	3.18428	3.17655	2.06026	2.11601	2.02992	2.72583	2.87683	2.57846	3.82686	3.76276	3.82824	2.74077	2.69192	2.54315	3.14282	3.29738	2.92277	4.17536	3.92143	4.07371	2.88539	2.79073	2.9101	3.87344	3.84298	3.84193
Sum C38	SM		+H+					QQQ+ SRM Q3mz184	SM 30:1	% of total SM	%	49.5306	1.10061	0.8728	1.08784	1.27178	1.03242	1.21419	0.865687	1.47894	0.716069	0.271226	1.40579	1.47754	0.606435	0.945384	0.66021	1.21525	1.01227	1.72311	1.50604	1.09662	1.45577	1.0968	0.9444	0.603449	0.993486	0.900717	0.963429	1.38527	1.47808	0.934068	0.845772	0.837524	0.851821	1.03771	0.794737	1.18214
Sum C40	SM		+H+					QQQ+ SRM Q3mz184	SM 30:1	% of total SM	%	6.99897	5.84693	6.5563	5.33147	6.09898	5.58783	5.85642	4.91248	5.70044	5.39339	5.64052	5.25679	5.02757	5.62608	5.24143	5.26426	4.76785	4.52666	5.40019	5.33762	5.34125	5.62078	5.54891	6.05571	5.78931	4.27517	4.43949	4.76996	4.89474	5.36059	4.75567	6.22692	5.68922	6.92491	5.32817	4.65743	4.73208
Sum C42	SM		+H+					QQQ+ SRM Q3mz184	SM 30:1	% of total SM	%	9.19236	22.733	23.0691	22.8566	24.5676	24.6981	24.3317	23.3739	23.0387	23.5251	22.4431	22.8193	22.1011	26.725	26.505	26.3898	24.2165	24.0252	23.5963	22.4959	21.8418	22.27	25.8317	25.5592	26.4662	23.3899	23.6222	23.2233	23.1653	23.5775	23.2055	27.2309	27.2669	28.2798	23.1686	23.058	23.1669
Sum DB0	SM		+H+					QQQ+ SRM Q3mz184	SM 30:1	% of total SM	%	28.5029	10.2141	10.1864	10.8129	11.8598	11.9813	12.7816	11.4381	11.2441	10.659	9.88006	10.855	10.0321	8.0606	8.01915	8.02228	8.68009	8.24634	8.58353	12.1366	11.7912	11.4844	7.12546	7.40476	6.63903	7.96854	7.92563	7.94195	12.1194	12.219	11.4482	5.64837	5.558	5.70985	6.85855	6.04716	6.4808
Sum DB1	SM		+H+					QQQ+ SRM Q3mz184	SM 30:1	% of total SM	%	55.3058	73.0815	72.7337	72.0552	70.6127	69.9375	69.8776	71.546	71.7838	72.0035	73.851	72.8846	73.9606	73.4788	73.5563	73.391	73.8432	74.5139	74.0796	71.1078	71.7618	71.7696	74.7484	74.9109	75.0846	74.2405	74.0298	74.2963	70.6186	70.1589	71.2757	75.8456	75.6747	75.1974	74.8894	75.4198	75.3638
Sum DB2	SM		+H+					QQQ+ SRM Q3mz184	SM 30:1	% of total SM	%	6.99897	14.7976	15.0446	14.9115	15.3297	15.6371	15.2825	14.9845	14.9765	15.3471	14.631	14.5309	14.3559	16.7652	16.5418	16.7841	15.563	15.4751	15.7406	15.212	14.9034	15.0378	16.639	16.3693	16.7983	16.5346	16.779	16.5426	15.8821	15.9905	15.7868	16.9906	17.1148	17.6287	16.7848	16.9941	16.6778
Sum DB3	SM		+H+					QQQ+ SRM Q3mz184	SM 30:1	% of total SM	%	0	1.6168	1.69408	1.97328	1.93499	2.04358	1.79856	1.61608	1.75172	1.76031	1.52119	1.59195	1.42739	1.54322	1.72629	1.67737	1.71585	1.51171	1.52867	1.34711	1.41194	1.49554	1.39007	1.2276	1.30125	1.08824	1.14584	1.07064	1.21157	1.42784	1.29301	1.38956	1.48841	1.36357	1.3542	1.37957	1.2859
Sum DB4	SM		+H+					QQQ+ SRM Q3mz184	SM 30:1	% of total SM	%	9.19236	0.289954	0.341131	0.247128	0.262799	0.400487	0.259771	0.415246	0.243877	0.230083	0.116771	0.13752	0.224094	0.152218	0.156406	0.125296	0.197855	0.252951	0.0675608	0.196462	0.13166	0.21276	0.0970539	0.0874515	0.176801	0.168131	0.119764	0.148556	0.168308	0.203791	0.196287	0.125862	0.164137	0.100565	0.113092	0.159382	0.191634
Sum Total	SM		+H+					QQQ+ SRM Q3mz184	SM 30:1	% of total SM	%	100	100	100	100	100	100	100	100	100	100	100	100	100	100	100	100	100	100	100	100	100	100	100	100	100	100	100	100	100	100	100	100	100	100	100	100	100
Cer d18:1/16:0	Cer	C34H68N1O3P	+H+	538.519	34	1	2	QQQ+ SRM Q3mz264	Cer d18:1/17:0	Concentration	nmol/mg protein	0.00110819	0.341218	0.279076	0.32212	0.2811	0.284528	0.220791	0.203124	0.194048	0.296862	0.319344	0.581204	0.371884	0.4624	0.490534	0.322871	0.305976	0.346404	0.333495	0.934192	0.683	0.576981	1.9674	2.00304	1.71113	0.354795	0.573624	0.386414	0.86199	1.10605	0.78675	0.72499	0.6489	1.06035	1.24131	0.899324	0.958
Cer d18:1/18:0	Cer	C36H72N1O3P	+H+	566.551	36	1	2	QQQ+ SRM Q3mz264	Cer d18:1/17:0	Concentration	nmol/mg protein	0.000173498	0.020318	0.0164447	0.0160757	0.024665	0.0227648	0.013834	0.0154047	0.0100101	0.0215501	0.0169979	0.028918	0.0233923	0.0147606	0.0175331	0.0106855	0.0164855	0.015508	0.0173505	0.0581351	0.04439	0.0393732	0.0697411	0.0828933	0.0592029	0.0156226	0.0227918	0.0181965	0.061642	0.0935143	0.0614361	0.0259342	0.0239304	0.0413117	0.0503465	0.0449428	0.0383005
Cer d18:1/18:1	Cer	C36H70N1O3P	+H+	564.535	36	2	2	QQQ+ SRM Q3mz264	Cer d18:1/17:0	Concentration	nmol/mg protein	0.00028969	0.00186928	0.00204888	0.00201865	0.00262335	0.00139669	0.00172762	0.00191745	0.000738799	0.00144775	0.00175829	0.00298416	0.00232878	0.00192349	0.00273634	0.00137194	0.00166648	0.00156212	0.00119518	0.00438697	0.00456507	0.00214062	0.0100047	0.00787321	0.00530008	0.00352792	0.00408692	0.00414412	0.0062495	0.00905416	0.00532359	0.00366938	0.00419059	0.00379422	0.00483042	0.00358644	0.00457349
Cer d18:1/20:0	Cer	C38H76N1O3P	+H+	594.582	38	1	2	QQQ+ SRM Q3mz264	Cer d18:1/17:0	Concentration	nmol/mg protein	0.000597784	0.0100678	0.0079174	0.00901843	0.0110646	0.00908164	0.0104036	0.00536944	0.00585362	0.0102195	0.00337141	0.0127042	0.0053408	0.00507154	0.0104535	0.00313347	0.00361648	0.0053152	0.0064356	0.0103849	0.011469	0.00941877	0.0207882	0.0215116	0.0160027	0.00291778	0.007868	0.00571624	0.0118415	0.0191499	0.0130443	0.00814703	0.00862885	0.0091107	0.0122573	0.00893951	0.010192
Cer d18:1/22:0	Cer	C40H80N1O3P	+H+	622.613	40	1	2	QQQ+ SRM Q3mz264	Cer d18:1/17:0	Concentration	nmol/mg protein	0	0.0646493	0.0544905	0.0624951	0.0650919	0.0574298	0.0495859	0.0385755	0.0411159	0.0642628	0.0365979	0.0717422	0.0465699	0.059299	0.0646057	0.0492436	0.0342645	0.0363499	0.0448868	0.11695	0.0945606	0.0744435	0.189825	0.168861	0.148408	0.0414348	0.0703777	0.0406484	0.108617	0.150956	0.105665	0.0861792	0.0818002	0.116102	0.10855	0.0649825	0.0691169
Cer d18:1/22:1	Cer	C40H78N1O3P	+H+	620.598	40	2	2	QQQ+ SRM Q3mz264	Cer d18:1/17:0	Concentration	nmol/mg protein	0	0.00579165	0.00647537	0.0085408	0.00615403	0.00842977	0.00597774	0.00549708	0.00475657	0.00974266	0.00337967	0.00787714	0.00604471	0.0128301	0.0126831	0.00951083	0.00723983	0.00706255	0.00688806	0.0171252	0.00811475	0.00807832	0.0329733	0.0256624	0.0239046	0.00685349	0.010893	0.00617439	0.0121156	0.0176913	0.00988849	0.013171	0.0116221	0.0172901	0.0197662	0.0101627	0.0135731
Cer d18:1/23:0	Cer	C41H82N1O3P	+H+	636.629	41	1	2	QQQ+ SRM Q3mz264	Cer d18:1/17:0	Concentration	nmol/mg protein	0	0.0634891	0.049402	0.0556004	0.04903	0.0380336	0.0388591	0.0313703	0.0439797	0.0522561	0.0430727	0.0637118	0.0404267	0.0363409	0.0402959	0.0244438	0.0318032	0.03648	0.0222957	0.0939032	0.073467	0.0508276	0.0863297	0.0870052	0.0553868	0.0313496	0.0414885	0.0266999	0.096592	0.147789	0.0884944	0.0389915	0.0368008	0.057407	0.0770582	0.0434308	0.0342086
Cer d18:1/24:0	Cer	C42H84N1O3P	+H+	650.645	42	1	2	QQQ+ SRM Q3mz264	Cer d18:1/17:0	Concentration	nmol/mg protein	0.000518527	0.517935	0.447119	0.489801	0.426646	0.404044	0.343597	0.299309	0.284371	0.437449	0.316969	0.630607	0.384383	0.51881	0.563419	0.403774	0.29197	0.326952	0.313732	0.901994	0.69645	0.519378	0.958306	0.85968	0.772439	0.295367	0.433661	0.299079	0.758988	1.04157	0.681392	0.698382	0.643442	0.822171	0.654667	0.486459	0.443533
Cer d18:1/24:1	Cer	C42H82N1O3P	+H+	648.629	42	2	2	QQQ+ SRM Q3mz264	Cer d18:1/17:0	Concentration	nmol/mg protein	0	0.318508	0.279191	0.323932	0.236925	0.245459	0.176034	0.192324	0.164872	0.269983	0.200143	0.385907	0.300286	0.466769	0.513523	0.360058	0.307078	0.36385	0.339053	0.706745	0.513026	0.406582	1.25484	1.24664	1.04973	0.387697	0.621286	0.399171	0.643638	0.850349	0.571339	0.582766	0.555701	0.795257	0.830202	0.652015	0.664695
Cer d18:1/26:0	Cer	C44H88N1O3P	+H+	678.676	44	1	2	QQQ+ SRM Q3mz264	Cer d18:1/17:0	Concentration	nmol/mg protein	0.000581515	0.0241291	0.0189375	0.0279959	0.0199389	0.0210512	0.0185715	0.0113793	0.0255428	0.0257	0.012752	0.0213556	0.0182548	0.0269552	0.0188357	0.0159739	0.012319	0.00833672	0.013995	0.0224191	0.0161813	0.0191159	0.0312418	0.0277763	0.0189159	0.00925147	0.0183366	0.00790523	0.0128997	0.021556	0.0133228	0.0159255	0.0176012	0.0301452	0.0264077	0.00962972	0.00969549
Cer d18:1/26:1	Cer	C44H86N1O3P	+H+	676.66	44	2	2	QQQ+ SRM Q3mz264	Cer d18:1/17:0	Concentration	nmol/mg protein	0	0.0459315	0.0363788	0.043501	0.0470022	0.0511585	0.0434694	0.034131	0.0275357	0.0455974	0.0189715	0.0386606	0.0282091	0.0402876	0.0564983	0.0419986	0.0304038	0.0391235	0.0267984	0.043201	0.029932	0.026155	0.0680927	0.0739105	0.0598222	0.0229945	0.0348717	0.0283494	0.0334035	0.034713	0.029966	0.0492004	0.0531014	0.0533729	0.0402317	0.0418617	0.0337905
Sum C34	Cer		+H+					QQQ+ SRM Q3mz264	Cer d18:1/17:0	Concentration	nmol/mg protein	0.00110819	0.341218	0.279076	0.32212	0.2811	0.284528	0.220791	0.203124	0.194048	0.296862	0.319344	0.581204	0.371884	0.4624	0.490534	0.322871	0.305976	0.346404	0.333495	0.934192	0.683	0.576981	1.9674	2.00304	1.71113	0.354795	0.573624	0.386414	0.86199	1.10605	0.78675	0.72499	0.6489	1.06035	1.24131	0.899324	0.958
Sum C36	Cer		+H+					QQQ+ SRM Q3mz264	Cer d18:1/17:0	Concentration	nmol/mg protein	0.000463188	0.0221872	0.0184936	0.0180943	0.0272883	0.0241614	0.0155617	0.0173221	0.0107489	0.0229978	0.0187562	0.0319022	0.0257211	0.0166841	0.0202694	0.0120574	0.0181519	0.0170701	0.0185456	0.0625221	0.0489551	0.0415138	0.0797458	0.0907665	0.064503	0.0191506	0.0268787	0.0223406	0.0678915	0.102568	0.0667597	0.0296036	0.028121	0.0451059	0.0551769	0.0485293	0.042874
Sum C38	Cer		+H+					QQQ+ SRM Q3mz264	Cer d18:1/17:0	Concentration	nmol/mg protein	0.000597784	0.0100678	0.0079174	0.00901843	0.0110646	0.00908164	0.0104036	0.00536944	0.00585362	0.0102195	0.00337141	0.0127042	0.0053408	0.00507154	0.0104535	0.00313347	0.00361648	0.0053152	0.0064356	0.0103849	0.011469	0.00941877	0.0207882	0.0215116	0.0160027	0.00291778	0.007868	0.00571624	0.0118415	0.0191499	0.0130443	0.00814703	0.00862885	0.0091107	0.0122573	0.00893951	0.010192
Sum C40	Cer		+H+					QQQ+ SRM Q3mz264	Cer d18:1/17:0	Concentration	nmol/mg protein		0.0704409	0.0609659	0.0710359	0.071246	0.0658595	0.0555637	0.0440726	0.0458725	0.0740054	0.0399776	0.0796194	0.0526146	0.0721291	0.0772889	0.0587544	0.0415043	0.0434124	0.0517749	0.134075	0.102675	0.0825218	0.222799	0.194524	0.172313	0.0482883	0.0812707	0.0468228	0.120733	0.168647	0.115554	0.0993502	0.0934223	0.133392	0.128316	0.0751451	0.08269
Sum C41	Cer		+H+					QQQ+ SRM Q3mz264	Cer d18:1/17:0	Concentration	nmol/mg protein		0.0634891	0.049402	0.0556004	0.04903	0.0380336	0.0388591	0.0313703	0.0439797	0.0522561	0.0430727	0.0637118	0.0404267	0.0363409	0.0402959	0.0244438	0.0318032	0.03648	0.0222957	0.0939032	0.073467	0.0508276	0.0863297	0.0870052	0.0553868	0.0313496	0.0414885	0.0266999	0.096592	0.147789	0.0884944	0.0389915	0.0368008	0.057407	0.0770582	0.0434308	0.0342086
Sum C42	Cer		+H+					QQQ+ SRM Q3mz264	Cer d18:1/17:0	Concentration	nmol/mg protein	0.000518527	0.836443	0.72631	0.813733	0.663571	0.649502	0.51963	0.491633	0.449243	0.707432	0.517112	1.01651	0.684669	0.985579	1.07694	0.763831	0.599047	0.690802	0.652786	1.60874	1.20948	0.925959	2.21315	2.10632	1.82217	0.683064	1.05495	0.69825	1.40263	1.89192	1.25273	1.28115	1.19914	1.61743	1.48487	1.13847	1.10823
Sum C44	Cer		+H+					QQQ+ SRM Q3mz264	Cer d18:1/17:0	Concentration	nmol/mg protein	0.000581515	0.0700606	0.0553162	0.0714969	0.0669412	0.0722097	0.0620409	0.0455104	0.0530785	0.0712974	0.0317235	0.0600162	0.0464638	0.0672428	0.075334	0.0579724	0.0427228	0.0474602	0.0407934	0.0656201	0.0461134	0.0452709	0.0993345	0.101687	0.0787381	0.032246	0.0532083	0.0362546	0.0463033	0.0562689	0.0432888	0.0651259	0.0707026	0.0835181	0.0666394	0.0514915	0.043486
Sum DB1	Cer		+H+					QQQ+ SRM Q3mz264	Cer d18:1/17:0	Concentration	nmol/mg protein	0.00297951	1.04181	0.873387	0.983106	0.877537	0.836933	0.695642	0.604532	0.604921	0.9083	0.749105	1.41024	0.890252	1.12364	1.20568	0.830124	0.696434	0.775346	0.752191	2.13798	1.61952	1.28954	3.32364	3.25077	2.78148	0.750738	1.16815	0.784659	1.91257	2.58058	1.7501	1.59855	1.4611	2.1366	2.1706	1.55771	1.56305
Sum DB2	Cer		+H+					QQQ+ SRM Q3mz264	Cer d18:1/17:0	Concentration	nmol/mg protein	0.00028969	0.372101	0.324094	0.377992	0.292704	0.306444	0.227208	0.23387	0.197903	0.326771	0.224252	0.435429	0.336868	0.52181	0.585441	0.412939	0.346388	0.411598	0.373935	0.771458	0.555638	0.442956	1.36591	1.35409	1.13875	0.421073	0.671138	0.437838	0.695407	0.911807	0.616517	0.648807	0.624615	0.869714	0.895031	0.707626	0.716632
Sum Total	Cer		+H+					QQQ+ SRM Q3mz264	Cer d18:1/17:0	Concentration	nmol/mg protein	0.0032692	1.41391	1.19748	1.3611	1.17024	1.14338	0.922851	0.838402	0.802824	1.23507	0.973357	1.84567	1.22712	1.64545	1.79112	1.24306	1.04282	1.18694	1.12613	2.90944	2.17516	1.73249	4.68955	4.60486	3.92024	1.17181	1.83929	1.2225	2.60798	3.49239	2.36662	2.24736	2.08572	3.00631	3.06563	2.26533	2.27968
Cer d18:1/16:0	Cer	C34H68N1O3P	+H+	538.519	34	1	2	QQQ+ SRM Q3mz264	Cer d18:1/17:0	% of total Cer	%	33.8978	24.133	23.3053	23.6662	24.0207	24.8849	23.9249	24.2276	24.1707	24.036	32.8085	31.4901	30.3054	28.1018	27.387	25.9738	29.3411	29.1846	29.6144	32.109	31.4	33.3035	41.953	43.4985	43.6486	30.2775	31.1873	31.6085	33.052	31.6703	33.2436	32.2597	31.1116	35.2708	40.4912	39.6994	42.0235
Cer d18:1/18:0	Cer	C36H72N1O3P	+H+	566.551	36	1	2	QQQ+ SRM Q3mz264	Cer d18:1/17:0	% of total Cer	%	5.30704	1.43701	1.37328	1.18108	2.10768	1.99101	1.49906	1.83739	1.24686	1.74485	1.74631	1.5668	1.90628	0.897055	0.978889	0.85961	1.58085	1.30654	1.54072	1.99816	2.04078	2.27263	1.48716	1.80013	1.51019	1.3332	1.23917	1.48847	2.36359	2.67766	2.59594	1.15399	1.14734	1.37416	1.64229	1.98394	1.68008
Cer d18:1/18:1	Cer	C36H70N1O3P	+H+	564.535	36	2	2	QQQ+ SRM Q3mz264	Cer d18:1/17:0	% of total Cer	%	8.86119	0.132207	0.171099	0.148311	0.224172	0.122155	0.187205	0.228702	0.092025	0.11722	0.180641	0.161684	0.189776	0.116898	0.152773	0.110367	0.159804	0.131609	0.106132	0.150784	0.209873	0.123557	0.213341	0.170976	0.135198	0.301066	0.222201	0.338988	0.23963	0.259254	0.224945	0.163275	0.200919	0.126208	0.157567	0.158318	0.20062
Cer d18:1/20:0	Cer	C38H76N1O3P	+H+	594.582	38	1	2	QQQ+ SRM Q3mz264	Cer d18:1/17:0	% of total Cer	%	18.2853	0.712052	0.661171	0.662585	0.945496	0.794282	1.12733	0.640437	0.729129	0.827445	0.346369	0.688322	0.435231	0.308216	0.583628	0.252076	0.346797	0.447805	0.571481	0.356939	0.527273	0.543654	0.443288	0.46715	0.408207	0.248998	0.427775	0.467587	0.454051	0.548332	0.551176	0.362516	0.413711	0.303052	0.399831	0.394622	0.44708
Cer d18:1/22:0	Cer	C40H80N1O3P	+H+	622.613	40	1	2	QQQ+ SRM Q3mz264	Cer d18:1/17:0	% of total Cer	%	0	4.57239	4.55043	4.59152	5.56227	5.02282	5.37313	4.60107	5.12141	5.20317	3.75997	3.88705	3.79506	3.60382	3.60701	3.96147	3.28575	3.06247	3.98595	4.01968	4.3473	4.2969	4.04784	3.66703	3.7857	3.53596	3.82636	3.32503	4.16481	4.32242	4.46482	3.83469	3.92192	3.86194	3.54087	2.86856	3.03187
Cer d18:1/22:1	Cer	C40H78N1O3P	+H+	620.598	40	2	2	QQQ+ SRM Q3mz264	Cer d18:1/17:0	% of total Cer	%	0	0.409621	0.540749	0.627493	0.525877	0.73727	0.647748	0.655662	0.592479	0.788835	0.347218	0.42679	0.492593	0.779736	0.708112	0.765112	0.694254	0.595019	0.611659	0.588609	0.373065	0.466283	0.703123	0.557289	0.609775	0.584863	0.59224	0.505063	0.464559	0.506567	0.417831	0.586069	0.557224	0.575126	0.644768	0.448616	0.595396
Cer d18:1/23:0	Cer	C41H82N1O3P	+H+	636.629	41	1	2	QQQ+ SRM Q3mz264	Cer d18:1/17:0	% of total Cer	%	0	4.49033	4.12549	4.08497	4.18973	3.32642	4.21077	3.74168	5.47812	4.23102	4.42516	3.45196	3.29444	2.20857	2.24976	1.96641	3.04972	3.07344	1.97985	3.22754	3.37755	2.93378	1.8409	1.88942	1.41284	2.67531	2.25569	2.18404	3.70371	4.23174	3.73927	1.73499	1.76442	1.90955	2.51362	1.91719	1.50059
Cer d18:1/24:0	Cer	C42H84N1O3P	+H+	650.645	42	1	2	QQQ+ SRM Q3mz264	Cer d18:1/17:0	% of total Cer	%	15.861	36.6315	37.3383	35.9857	36.458	35.3378	37.2321	35.6999	35.4213	35.419	32.5645	34.1668	31.324	31.53	31.4563	32.4821	27.998	27.5457	27.8594	31.0024	32.0184	29.9786	20.4349	18.669	19.7039	25.206	23.5777	24.4646	29.1026	29.8239	28.7918	31.0757	30.8499	27.3482	21.3551	21.474	19.4559
Cer d18:1/24:1	Cer	C42H82N1O3P	+H+	648.629	42	2	2	QQQ+ SRM Q3mz264	Cer d18:1/17:0	% of total Cer	%	0	22.5268	23.3149	23.7993	20.2458	21.4679	19.075	22.9394	20.5365	21.8597	20.5621	20.9087	24.4708	28.3673	28.6705	28.9653	29.4468	30.6543	30.1079	24.2915	23.5857	23.468	26.7582	27.0723	26.7771	33.0853	33.7787	32.6521	24.6796	24.3486	24.1415	25.9312	26.6432	26.4529	27.081	28.7823	29.1574
Cer d18:1/26:0	Cer	C44H88N1O3P	+H+	678.676	44	1	2	QQQ+ SRM Q3mz264	Cer d18:1/17:0	% of total Cer	%	17.7877	1.70656	1.58144	2.05686	1.70383	1.84114	2.01241	1.35727	3.18162	2.08085	1.31011	1.15706	1.48761	1.63817	1.05162	1.28504	1.18132	0.702368	1.24276	0.770564	0.743916	1.10338	0.6662	0.603196	0.482519	0.789502	0.996941	0.646646	0.494625	0.617227	0.562945	0.708632	0.84389	1.00273	0.861413	0.425091	0.425301
Cer d18:1/26:1	Cer	C44H86N1O3P	+H+	676.66	44	2	2	QQQ+ SRM Q3mz264	Cer d18:1/17:0	% of total Cer	%	0	3.24855	3.03794	3.19602	4.01646	4.47433	4.71034	4.07096	3.42985	3.69189	1.94908	2.09466	2.2988	2.44843	3.15436	3.37863	2.91553	3.29615	2.3797	1.48486	1.37609	1.50967	1.45201	1.60506	1.52598	1.96231	1.89594	2.31897	1.28082	0.99396	1.26619	2.18926	2.54595	1.77536	1.31235	1.84793	1.48225
Sum C34	Cer		+H+					QQQ+ SRM Q3mz264	Cer d18:1/17:0	% of total Cer	%	33.8978	24.133	23.3053	23.6662	24.0207	24.8849	23.9249	24.2276	24.1707	24.036	32.8085	31.4901	30.3054	28.1018	27.387	25.9738	29.3411	29.1846	29.6144	32.109	31.4	33.3035	41.953	43.4985	43.6486	30.2775	31.1873	31.6085	33.052	31.6703	33.2436	32.2597	31.1116	35.2708	40.4912	39.6994	42.0235
Sum C36	Cer		+H+					QQQ+ SRM Q3mz264	Cer d18:1/17:0	% of total Cer	%	14.1682	1.56922	1.54438	1.32939	2.33185	2.11317	1.68626	2.06609	1.33888	1.86207	1.92696	1.72849	2.09606	1.01395	1.13166	0.969978	1.74066	1.43815	1.64685	2.14894	2.25065	2.39619	1.7005	1.9711	1.64538	1.63427	1.46137	1.82745	2.60322	2.93691	2.82089	1.31726	1.34826	1.50037	1.79986	2.14226	1.8807
Sum C38	Cer		+H+					QQQ+ SRM Q3mz264	Cer d18:1/17:0	% of total Cer	%	18.2853	0.712052	0.661171	0.662585	0.945496	0.794282	1.12733	0.640437	0.729129	0.827445	0.346369	0.688322	0.435231	0.308216	0.583628	0.252076	0.346797	0.447805	0.571481	0.356939	0.527273	0.543654	0.443288	0.46715	0.408207	0.248998	0.427775	0.467587	0.454051	0.548332	0.551176	0.362516	0.413711	0.303052	0.399831	0.394622	0.44708
Sum C40	Cer		+H+					QQQ+ SRM Q3mz264	Cer d18:1/17:0	% of total Cer	%	0	4.98201	5.09118	5.21901	6.08815	5.76009	6.02088	5.25673	5.71389	5.992	4.10719	4.31384	4.28765	4.38356	4.31512	4.72658	3.98	3.65749	4.59761	4.60829	4.72037	4.76319	4.75096	4.22432	4.39547	4.12083	4.4186	3.83009	4.62937	4.82899	4.88266	4.42076	4.47914	4.43707	4.18564	3.31718	3.62726
Sum C41	Cer		+H+					QQQ+ SRM Q3mz264	Cer d18:1/17:0	% of total Cer	%	0	4.49033	4.12549	4.08497	4.18973	3.32642	4.21077	3.74168	5.47812	4.23102	4.42516	3.45196	3.29444	2.20857	2.24976	1.96641	3.04972	3.07344	1.97985	3.22754	3.37755	2.93378	1.8409	1.88942	1.41284	2.67531	2.25569	2.18404	3.70371	4.23174	3.73927	1.73499	1.76442	1.90955	2.51362	1.91719	1.50059
Sum C42	Cer		+H+					QQQ+ SRM Q3mz264	Cer d18:1/17:0	% of total Cer	%	15.861	59.1583	60.6531	59.785	56.7038	56.8056	56.3071	58.6393	55.9578	57.2787	53.1266	55.0755	55.7948	59.8973	60.1268	61.4475	57.4448	58.2	57.9674	55.2938	55.6041	53.4467	47.1932	45.7413	46.481	58.2913	57.3563	57.1167	53.7822	54.1726	52.9333	57.0069	57.4931	53.8011	48.4361	50.2563	48.6133
Sum C44	Cer		+H+					QQQ+ SRM Q3mz264	Cer d18:1/17:0	% of total Cer	%	17.7877	4.95511	4.61938	5.25289	5.72029	6.31548	6.72275	5.42823	6.61147	5.77274	3.25919	3.25173	3.78641	4.0866	4.20598	4.66367	4.09685	3.99852	3.62246	2.25542	2.12	2.61305	2.11821	2.20825	2.0085	2.75181	2.89288	2.96562	1.77545	1.61119	1.82914	2.89789	3.38984	2.77809	2.17376	2.27302	1.90755
Sum DB1	Cer		+H+					QQQ+ SRM Q3mz264	Cer d18:1/17:0	% of total Cer	%	91.1388	73.6828	72.9353	72.2289	74.9877	73.1984	75.3797	72.1053	75.3492	73.5423	76.9609	76.4081	72.548	68.2876	67.3142	66.7805	66.7836	65.3229	66.7946	73.4843	74.4553	74.4325	70.8733	70.5944	70.9519	64.0665	63.511	64.1849	73.3354	73.8916	73.9495	71.1302	70.0527	71.0704	70.8043	68.7629	68.5643
Sum DB2	Cer		+H+					QQQ+ SRM Q3mz264	Cer d18:1/17:0	% of total Cer	%	8.86119	26.3172	27.0647	27.7711	25.0123	26.8016	24.6203	27.8947	24.6508	26.4577	23.0391	23.5919	27.452	31.7124	32.6858	33.2195	33.2164	34.6771	33.2054	26.5157	25.5447	25.5675	29.1267	29.4056	29.0481	35.9335	36.489	35.8151	26.6646	26.1084	26.0505	28.8698	29.9473	28.9296	29.1957	31.2371	31.4357
Sum Total	Cer		+H+					QQQ+ SRM Q3mz264	Cer d18:1/17:0	% of total Cer	%	100	100	100	100	100	100	100	100	100	100	100	100	100	100	100	100	100	100	100	100	100	100	100	100	100	100	100	100	100	100	100	100	100	100	100	100	100
HexCer d18:1/12:0	HexCer	C36H70N1O8P	+H+	644.51	30	1	2	QQQ+ SRM Q3mz264	Cer d18:1/17:0	Concentration	nmol/mg protein	0.00749063	0.00902128	0	0	0	0.0410178	0	0.055734	0	0	0	0.0248614	0.0476786	0	0	0.0205466	0	0	0.0371947	0.00132532	0	0	0	0.0386175	0	0	0	0	0.0323896	0	0	0.0271613	0.082282	0.00175669	0	0.00596909	0
HexCer d18:1/16:0	HexCer	C40H78N1O8P	+H+	700.572	34	1	2	QQQ+ SRM Q3mz264	Cer d18:1/17:0	Concentration	nmol/mg protein	0	0.192358	0.154577	0.18101	0.130586	0.130871	0.0926607	0.147507	0.120034	0.19142	0.0766377	0.155288	0.0993428	0.110402	0.140096	0.0946053	0.12868	0.13827	0.142221	0.151323	0.102386	0.0939432	0.494358	0.505262	0.48691	0.16229	0.277862	0.184084	0.120737	0.147297	0.0911261	0.185239	0.168953	0.178043	0.223971	0.175929	0.181126
HexCer d18:1/18:0	HexCer	C42H82N1O8P	+H+	728.603	36	1	2	QQQ+ SRM Q3mz264	Cer d18:1/17:0	Concentration	nmol/mg protein	0	0.0150572	0.00953589	0.0117241	0.0123944	0.0145168	0.00900742	0.00940954	0.00850194	0.00910839	0.00974411	0.0161192	0.0103526	0.00638715	0.00715359	0.00568339	0.0101517	0.0154676	0.0144925	0.0193539	0.0083978	0.00615332	0.0322676	0.0370018	0.031137	0.0165331	0.024984	0.0158018	0.01402	0.0136549	0.012694	0.019564	0.0136886	0.0136744	0.0204006	0.0149678	0.0181965
HexCer d18:1/18:1	HexCer	C42H80N1O8P	+H+	726.588	36	2	2	QQQ+ SRM Q3mz264	Cer d18:1/17:0	Concentration	nmol/mg protein	0	0.0174738	0.00758532	0.0104826	0.0125252	0.00956571	0.0112551	0.0113726	0.01109	0.0111008	0.004982	0.00930049	0.00706824	0.00497837	0.0066517	0.00325191	0.00431507	0.00411929	0.00630018	0.00725971	0.0042727	0.00438414	0.0100914	0.00475623	0.00564259	0.0082305	0.0050078	0	0.00532772	0.00651565	0.00373	0.00385305	0.00340309	0	0	0.00339001	0.0036167
HexCer d18:1/20:0	HexCer	C44H86N1O8P	+H+	756.635	38	1	2	QQQ+ SRM Q3mz264	Cer d18:1/17:0	Concentration	nmol/mg protein	0	0.0160684	0.0127573	0	0.00813728	0.00642881	0.0123063	0.00925586	0.0120854	0.0164495	0.00931933	0.0126973	0.00638372	0.0046367	0.00929056	0.00458318	0	0.00660978	0.011315	0.00914873	0	0.0057696	0.0245186	0.00985888	0.0165525	0.00532607	0.0137351	0.00504349	0	0.00647575	0.00545326	0.0119835	0.00779782	0.0159616	0.0100331	0.00787991	0.00820345
HexCer d18:1/22:1	HexCer	C46H88N1O8P	+H+	782.65	40	2	2	QQQ+ SRM Q3mz264	Cer d18:1/17:0	Concentration	nmol/mg protein	0	0.0114725	0.017113	0	0.00958178	0.0143965	0	0.0100426	0.00693327	0.0266698	0	0.0254344	0.0101766	0.0175533	0.0282254	0.00818975	0.0101442	0.0146221	0.0116861	0.0159354	0.00927667	0	0.0266565	0.0368273	0.0340382	0.028415	0.0302895	0.0126999	0.0229949	0	0.0204151	0.029657	0.0245835	0.0235734	0.0247281	0.0297357	0.0183261
HexCer d18:1/22:1	HexCer	C46H88N1O8P	+H+	782.65	40	2	2	QQQ+ SRM Q3mz264	Cer d18:1/17:0	Concentration	nmol/mg protein	0	0.182874	0.178916	0.192925	0.152547	0.130783	0.121391	0.127244	0.123628	0.198861	0.0785143	0.161022	0.112465	0.118325	0.161491	0.106277	0.134959	0.135135	0.143582	0.13136	0.123458	0.0863367	0.333019	0.347929	0.312664	0.146962	0.241033	0.155612	0.128909	0.16507	0.100374	0.253283	0.180869	0.224412	0.237672	0.175035	0.180854
HexCer d18:1/23:0	HexCer	C47H92N1O8P	+H+	798.682	41	1	2	QQQ+ SRM Q3mz264	Cer d18:1/17:0	Concentration	nmol/mg protein	0	0.0773776	0.0578787	0.0758759	0.0420793	0.0604064	0.0393259	0.049838	0.0429412	0.0827963	0.0533074	0.0745101	0.0443715	0.050523	0.0411437	0.0274846	0.0432804	0.049393	0.0516131	0.0844154	0.0564565	0.0454789	0.0776073	0.0839958	0.073506	0.0468112	0.073854	0.0543853	0.0577237	0.0762785	0.0617121	0.0822022	0.080717	0.078651	0.0832205	0.0589068	0.0577375
HexCer d18:1/24:0	HexCer	C48H94N1O8P	+H+	812.697	42	1	2	QQQ+ SRM Q3mz264	Cer d18:1/17:0	Concentration	nmol/mg protein	0	0.771386	0.611864	0.726959	0.495857	0.521427	0.410126	0.509486	0.46823	0.683576	0.29435	0.588079	0.359072	0.408016	0.494706	0.35392	0.399462	0.449757	0.476953	0.454443	0.342482	0.277472	0.695691	0.636844	0.568812	0.426214	0.692519	0.377391	0.315942	0.44783	0.321686	0.592293	0.566937	0.567076	0.644594	0.458628	0.434087
HexCer d18:1/24:1	HexCer	C48H92N1O8P	+H+	810.682	42	2	2	QQQ+ SRM Q3mz264	Cer d18:1/17:0	Concentration	nmol/mg protein	0.00288709	0.323427	0.286987	0.319382	0.229234	0.202954	0.171709	0.291555	0.215717	0.364938	0.211796	0.379629	0.210816	0.280095	0.319967	0.23057	0.308659	0.332615	0.355946	0.382004	0.273142	0.238704	0.701407	0.667969	0.600591	0.45014	0.7097	0.455621	0.305293	0.430191	0.305124	0.347551	0.302532	0.343071	0.482998	0.349065	0.333367
HexCer d18:1/26:0	HexCer	C50H98N1O8P	+H+	840.729	44	1	2	QQQ+ SRM Q3mz264	Cer d18:1/17:0	Concentration	nmol/mg protein	0	0.040611	0.0392196	0.0480749	0.0399733	0.0312063	0.0165639	0.0242781	0.01788	0.0534074	0.0153352	0.0240465	0.0175999	0.0211973	0.0294718	0.0193409	0.0247567	0.0123071	0.0202612	0.0341927	0.0266569	0.01047	0.0360426	0.0196963	0.0159238	0	0.0205163	0	0.0185603	0.0261878	0.0163942	0.0325044	0.0231318	0.0304174	0.0296904	0.0114936	0.0203895
HexCer d18:1/26:1	HexCer	C50H96N1O8P	+H+	838.713	44	2	2	QQQ+ SRM Q3mz264	Cer d18:1/17:0	Concentration	nmol/mg protein	0	0.0420135	0.0257949	0.0486839	0.0436858	0.0447109	0.043046	0.0554829	0.0372182	0.0425022	0.0180984	0.0265371	0.017491	0.0320571	0.039394	0.0287324	0.0302073	0.0259534	0.0311076	0.0288241	0.0189855	0.0162961	0.0408302	0.0318564	0.0327951	0.0390258	0.0358514	0.0139631	0.0192124	0.0295718	0.0300951	0.0477446	0.0508816	0.0317627	0.059249	0.0371096	0.0348652
Sum C30	HexCer		+H+					QQQ+ SRM Q3mz264	Cer d18:1/17:0	Concentration	nmol/mg protein	0.00749063	0.00902128				0.0410178		0.055734				0.0248614	0.0476786			0.0205466			0.0371947	0.00132532				0.0386175					0.0323896			0.0271613	0.082282	0.00175669		0.00596909
Sum C34	HexCer		+H+					QQQ+ SRM Q3mz264	Cer d18:1/17:0	Concentration	nmol/mg protein		0.192358	0.154577	0.18101	0.130586	0.130871	0.0926607	0.147507	0.120034	0.19142	0.0766377	0.155288	0.0993428	0.110402	0.140096	0.0946053	0.12868	0.13827	0.142221	0.151323	0.102386	0.0939432	0.494358	0.505262	0.48691	0.16229	0.277862	0.184084	0.120737	0.147297	0.0911261	0.185239	0.168953	0.178043	0.223971	0.175929	0.181126
Sum C36	HexCer		+H+					QQQ+ SRM Q3mz264	Cer d18:1/17:0	Concentration	nmol/mg protein		0.032531	0.0171212	0.0222066	0.0249196	0.0240825	0.0202625	0.0207821	0.0195919	0.0202092	0.0147261	0.0254197	0.0174209	0.0113655	0.0138053	0.0089353	0.0144668	0.0195869	0.0207927	0.0266136	0.0126705	0.0105375	0.042359	0.0417581	0.0367796	0.0247636	0.0299918	0.0158018	0.0193477	0.0201705	0.016424	0.0234171	0.0170917	0.0136744	0.0204006	0.0183578	0.0218132
Sum C38	HexCer		+H+					QQQ+ SRM Q3mz264	Cer d18:1/17:0	Concentration	nmol/mg protein		0.0160684	0.0127573		0.00813728	0.00642881	0.0123063	0.00925586	0.0120854	0.0164495	0.00931933	0.0126973	0.00638372	0.0046367	0.00929056	0.00458318		0.00660978	0.011315	0.00914873		0.0057696	0.0245186	0.00985888	0.0165525	0.00532607	0.0137351	0.00504349		0.00647575	0.00545326	0.0119835	0.00779782	0.0159616	0.0100331	0.00787991	0.00820345
Sum C40	HexCer		+H+					QQQ+ SRM Q3mz264	Cer d18:1/17:0	Concentration	nmol/mg protein		0.194346	0.196029	0.192925	0.162129	0.145179	0.121391	0.137287	0.130562	0.225531	0.0785143	0.186456	0.122642	0.135878	0.189716	0.114466	0.145103	0.149757	0.155268	0.147295	0.132735	0.0863367	0.359675	0.384756	0.346702	0.175377	0.271322	0.168312	0.151904	0.16507	0.12079	0.28294	0.205452	0.247986	0.2624	0.20477	0.19918
Sum C41	HexCer		+H+					QQQ+ SRM Q3mz264	Cer d18:1/17:0	Concentration	nmol/mg protein		0.0773776	0.0578787	0.0758759	0.0420793	0.0604064	0.0393259	0.049838	0.0429412	0.0827963	0.0533074	0.0745101	0.0443715	0.050523	0.0411437	0.0274846	0.0432804	0.049393	0.0516131	0.0844154	0.0564565	0.0454789	0.0776073	0.0839958	0.073506	0.0468112	0.073854	0.0543853	0.0577237	0.0762785	0.0617121	0.0822022	0.080717	0.078651	0.0832205	0.0589068	0.0577375
Sum C42	HexCer		+H+					QQQ+ SRM Q3mz264	Cer d18:1/17:0	Concentration	nmol/mg protein	0.00288709	1.09481	0.898851	1.04634	0.725091	0.724381	0.581836	0.801041	0.683947	1.04851	0.506146	0.967707	0.569888	0.688111	0.814673	0.58449	0.708121	0.782372	0.8329	0.836447	0.615624	0.516175	1.3971	1.30481	1.1694	0.876354	1.40222	0.833013	0.621235	0.878021	0.62681	0.939844	0.869469	0.910148	1.12759	0.807693	0.767454
Sum C44	HexCer		+H+					QQQ+ SRM Q3mz264	Cer d18:1/17:0	Concentration	nmol/mg protein		0.0826245	0.0650145	0.0967589	0.083659	0.0759171	0.0596099	0.0797609	0.0550982	0.0959096	0.0334335	0.0505836	0.0350909	0.0532544	0.0688658	0.0480733	0.054964	0.0382605	0.0513687	0.0630168	0.0456424	0.0267662	0.0768728	0.0515527	0.048719	0.0390258	0.0563677	0.0139631	0.0377726	0.0557596	0.0464894	0.080249	0.0740134	0.0621801	0.0889394	0.0486032	0.0552547
Sum DB1	HexCer		+H+					QQQ+ SRM Q3mz264	Cer d18:1/17:0	Concentration	nmol/mg protein	0.00749063	1.12188	0.885833	1.04364	0.729027	0.805874	0.579991	0.805509	0.669672	1.03676	0.458693	0.895602	0.584801	0.601162	0.721862	0.526164	0.606331	0.671804	0.754051	0.754202	0.536379	0.439287	1.36049	1.33128	1.19284	0.657174	1.10347	0.636706	0.559372	0.717723	0.509065	0.950948	0.943507	0.88558	1.01191	0.733774	0.71974
Sum DB2	HexCer		+H+					QQQ+ SRM Q3mz264	Cer d18:1/17:0	Concentration	nmol/mg protein	0.00288709	0.57726	0.516397	0.571474	0.447574	0.40241	0.347402	0.495698	0.394587	0.644072	0.313391	0.601923	0.358017	0.453009	0.555729	0.377021	0.488284	0.512444	0.548622	0.565384	0.429135	0.345721	1.112	1.08934	0.98573	0.672773	1.02188	0.637897	0.481737	0.631349	0.459738	0.682089	0.562269	0.62282	0.804647	0.594335	0.571029
Sum Total	HexCer		+H+					QQQ+ SRM Q3mz264	Cer d18:1/17:0	Concentration	nmol/mg protein	0.0103777	1.69914	1.40223	1.61512	1.1766	1.20828	0.927392	1.30121	1.06426	1.68083	0.772084	1.49752	0.942818	1.05417	1.27759	0.903184	1.09461	1.18425	1.30267	1.31959	0.965514	0.785008	2.47249	2.42061	2.17857	1.32995	2.12535	1.2746	1.04111	1.34907	0.968804	1.63304	1.50578	1.5084	1.81656	1.32811	1.29077
HexCer d18:1/12:0	HexCer	C36H70N1O8P	+H+	644.51	30	1	2	QQQ+ SRM Q3mz264	Cer d18:1/17:0	% of total HexCer	%	72.1799	0.530932	0	0	0	3.39471	0	4.28326	0	0	0	1.66017	5.05703	0	0	2.27491	0	0	2.85526	0.100434	0	0	0	1.59536	0	0	0	0	3.11107	0	0	1.66324	5.46443	0.11646	0	0.449443	0
HexCer d18:1/16:0	HexCer	C40H78N1O8P	+H+	700.572	34	1	2	QQQ+ SRM Q3mz264	Cer d18:1/17:0	% of total HexCer	%	0	11.3209	11.0237	11.2072	11.0985	10.8312	9.99154	11.3362	11.2786	11.3884	9.92608	10.3697	10.5368	10.4729	10.9656	10.4746	11.7558	11.6757	10.9176	11.4675	10.6043	11.9672	19.9943	20.8733	22.35	12.2027	13.0737	14.4424	11.5969	10.9184	9.40604	11.3432	11.2203	11.8034	12.3294	13.2466	14.0324
HexCer d18:1/18:0	HexCer	C42H82N1O8P	+H+	728.603	36	1	2	QQQ+ SRM Q3mz264	Cer d18:1/17:0	% of total HexCer	%	0	0.886167	0.680052	0.725896	1.05341	1.20144	0.971264	0.72314	0.79886	0.541898	1.26205	1.07639	1.09805	0.605893	0.559929	0.629261	0.927421	1.30611	1.11252	1.46666	0.869775	0.783855	1.30507	1.52861	1.42924	1.24314	1.17552	1.23974	1.34664	1.01217	1.31027	1.19802	0.909073	0.90655	1.12304	1.127	1.40974
HexCer d18:1/18:1	HexCer	C42H80N1O8P	+H+	726.588	36	2	2	QQQ+ SRM Q3mz264	Cer d18:1/17:0	% of total HexCer	%	0	1.02839	0.540947	0.649028	1.06452	0.791677	1.21362	0.874004	1.04204	0.660437	0.645266	0.621058	0.749692	0.472255	0.520644	0.36005	0.394209	0.34784	0.483635	0.550151	0.442531	0.558484	0.408148	0.196489	0.259004	0.61886	0.235622	0	0.511736	0.482972	0.385011	0.235944	0.226002	0	0	0.255251	0.280197
HexCer d18:1/20:0	HexCer	C44H86N1O8P	+H+	756.635	38	1	2	QQQ+ SRM Q3mz264	Cer d18:1/17:0	% of total HexCer	%	0	0.945679	0.909786	0	0.691592	0.532061	1.32697	0.711329	1.13557	0.978652	1.20704	0.847886	0.677089	0.439843	0.727194	0.507447	0	0.558141	0.868597	0.693304	0	0.734973	0.991655	0.407288	0.759788	0.400473	0.646251	0.395691	0	0.480015	0.562885	0.733819	0.517861	1.05818	0.552314	0.593318	0.635548
HexCer d18:1/22:1	HexCer	C46H88N1O8P	+H+	782.65	40	2	2	QQQ+ SRM Q3mz264	Cer d18:1/17:0	% of total HexCer	%	0	0.675194	1.22041	0	0.814361	1.19148	0	0.77179	0.651465	1.58671	0	1.69843	1.07938	1.66513	2.20927	0.906764	0.926734	1.23472	0.897087	1.20761	0.960802	0	1.07812	1.5214	1.56241	2.13655	1.42515	0.996379	2.20869	0	2.10725	1.81607	1.63261	1.56281	1.36126	2.23895	1.41978
HexCer d18:1/22:1	HexCer	C46H88N1O8P	+H+	782.65	40	2	2	QQQ+ SRM Q3mz264	Cer d18:1/17:0	% of total HexCer	%	0	10.7627	12.7594	11.9449	12.9651	10.8238	13.0895	9.77896	11.6164	11.8311	10.1691	10.7525	11.9286	11.2245	12.6403	11.7669	12.3293	11.411	11.0221	9.95464	12.7868	10.9982	13.469	14.3736	14.3518	11.0502	11.3408	12.2087	12.3819	12.2358	10.3607	15.51	12.0117	14.8775	13.0836	13.1792	14.0113
HexCer d18:1/23:0	HexCer	C47H92N1O8P	+H+	798.682	41	1	2	QQQ+ SRM Q3mz264	Cer d18:1/17:0	% of total HexCer	%	0	4.55393	4.12762	4.69786	3.57634	4.99936	4.24048	3.83014	4.03485	4.92592	6.90435	4.97555	4.70626	4.79267	3.22042	3.04308	3.95394	4.17083	3.96209	6.39712	5.8473	5.79344	3.13883	3.47002	3.37405	3.51978	3.47491	4.26684	5.54445	5.65414	6.36993	5.03371	5.36049	5.2142	4.58122	4.43539	4.47311
HexCer d18:1/24:0	HexCer	C48H94N1O8P	+H+	812.697	42	1	2	QQQ+ SRM Q3mz264	Cer d18:1/17:0	% of total HexCer	%	0	45.3986	43.6351	45.0097	42.1432	43.1544	44.2236	39.1549	43.9958	40.669	38.124	39.2701	38.085	38.7049	38.7218	39.1858	36.4933	37.9782	36.6134	34.4383	35.4715	35.3464	28.1373	26.3092	26.1094	32.0474	32.5837	29.6086	30.3467	33.1954	33.2044	36.2694	37.6508	37.5946	35.4844	34.5324	33.6301
HexCer d18:1/24:1	HexCer	C48H92N1O8P	+H+	810.682	42	2	2	QQQ+ SRM Q3mz264	Cer d18:1/17:0	% of total HexCer	%	27.8201	19.0347	20.4665	19.7746	19.4827	16.7969	18.5153	22.4065	20.2692	21.7118	27.4317	25.3504	22.3602	26.5701	25.0446	25.5286	28.198	28.0866	27.3243	28.9488	28.2898	30.4078	28.3685	27.595	27.5681	33.8465	33.3921	35.7462	29.3238	31.8879	31.4949	21.2825	20.0914	22.7441	26.5887	26.2828	25.827
HexCer d18:1/26:0	HexCer	C50H98N1O8P	+H+	840.729	44	1	2	QQQ+ SRM Q3mz264	Cer d18:1/17:0	% of total HexCer	%	0	2.39009	2.79694	2.97656	3.39735	2.58269	1.78608	1.86581	1.68004	3.17744	1.98621	1.60575	1.86673	2.0108	2.30683	2.14141	2.26168	1.03923	1.55535	2.59117	2.7609	1.33375	1.45775	0.813689	0.73093	0	0.965314	0	1.78274	1.94117	1.69221	1.99043	1.53621	2.01654	1.63443	0.865408	1.57964
HexCer d18:1/26:1	HexCer	C50H96N1O8P	+H+	838.713	44	2	2	QQQ+ SRM Q3mz264	Cer d18:1/17:0	% of total HexCer	%	0	2.47263	1.83956	3.01427	3.71288	3.70036	4.64161	4.26395	3.4971	2.52865	2.34409	1.77206	1.85518	3.04098	3.08346	3.18123	2.75963	2.19155	2.38798	2.18433	1.96637	2.07592	1.65138	1.31605	1.50535	2.93439	1.68684	1.09549	1.84538	2.19201	3.10642	2.92367	3.37909	2.10572	3.26161	2.79417	2.70111
Sum C30	HexCer		+H+					QQQ+ SRM Q3mz264	Cer d18:1/17:0	% of total HexCer	%	72.1799	0.530932	0	0	0	3.39471	0	4.28326	0	0	0	1.66017	5.05703	0	0	2.27491	0	0	2.85526	0.100434	0	0	0	1.59536	0	0	0	0	3.11107	0	0	1.66324	5.46443	0.11646	0	0.449443	0
Sum C34	HexCer		+H+					QQQ+ SRM Q3mz264	Cer d18:1/17:0	% of total HexCer	%	0	11.3209	11.0237	11.2072	11.0985	10.8312	9.99154	11.3362	11.2786	11.3884	9.92608	10.3697	10.5368	10.4729	10.9656	10.4746	11.7558	11.6757	10.9176	11.4675	10.6043	11.9672	19.9943	20.8733	22.35	12.2027	13.0737	14.4424	11.5969	10.9184	9.40604	11.3432	11.2203	11.8034	12.3294	13.2466	14.0324
Sum C36	HexCer		+H+					QQQ+ SRM Q3mz264	Cer d18:1/17:0	% of total HexCer	%	0	1.91456	1.221	1.37492	2.11793	1.99311	2.18489	1.59714	1.8409	1.20234	1.90732	1.69745	1.84775	1.07815	1.08057	0.989311	1.32163	1.65395	1.59616	2.01681	1.31231	1.34234	1.71321	1.7251	1.68824	1.862	1.41114	1.23974	1.85838	1.49514	1.69528	1.43396	1.13508	0.90655	1.12304	1.38225	1.68994
Sum C38	HexCer		+H+					QQQ+ SRM Q3mz264	Cer d18:1/17:0	% of total HexCer	%	0	0.945679	0.909786	0	0.691592	0.532061	1.32697	0.711329	1.13557	0.978652	1.20704	0.847886	0.677089	0.439843	0.727194	0.507447	0	0.558141	0.868597	0.693304	0	0.734973	0.991655	0.407288	0.759788	0.400473	0.646251	0.395691	0	0.480015	0.562885	0.733819	0.517861	1.05818	0.552314	0.593318	0.635548
Sum C40	HexCer		+H+					QQQ+ SRM Q3mz264	Cer d18:1/17:0	% of total HexCer	%	0	11.4379	13.9798	11.9449	13.7795	12.0153	13.0895	10.5507	12.2678	13.4178	10.1691	12.451	13.008	12.8896	14.8495	12.6737	13.2561	12.6457	11.9192	11.1622	13.7476	10.9982	14.5471	15.895	15.9142	13.1867	12.766	13.2051	14.5906	12.2358	12.4679	17.326	13.6443	16.4403	14.4449	15.4182	15.4311
Sum C41	HexCer		+H+					QQQ+ SRM Q3mz264	Cer d18:1/17:0	% of total HexCer	%	0	4.55393	4.12762	4.69786	3.57634	4.99936	4.24048	3.83014	4.03485	4.92592	6.90435	4.97555	4.70626	4.79267	3.22042	3.04308	3.95394	4.17083	3.96209	6.39712	5.8473	5.79344	3.13883	3.47002	3.37405	3.51978	3.47491	4.26684	5.54445	5.65414	6.36993	5.03371	5.36049	5.2142	4.58122	4.43539	4.47311
Sum C42	HexCer		+H+					QQQ+ SRM Q3mz264	Cer d18:1/17:0	% of total HexCer	%	27.8201	64.4334	64.1016	64.7842	61.6259	59.9512	62.7389	61.5614	64.2651	62.3808	65.5558	64.6205	60.4452	65.2751	63.7664	64.7143	64.6913	66.0648	63.9377	63.3871	63.7613	65.7542	56.5057	53.9042	53.6775	65.8939	65.9759	65.3547	59.6705	65.0833	64.6993	57.5519	57.7423	60.3386	62.0731	60.8152	59.4571
Sum C44	HexCer		+H+					QQQ+ SRM Q3mz264	Cer d18:1/17:0	% of total HexCer	%	0	4.86273	4.63651	5.99083	7.11023	6.28305	6.42769	6.12977	5.17714	5.70609	4.3303	3.37782	3.72191	5.05178	5.39029	5.32264	5.02131	3.23078	3.94333	4.7755	4.72727	3.40967	3.10913	2.12974	2.23628	2.93439	2.65216	1.09549	3.62812	4.13318	4.79863	4.9141	4.9153	4.12226	4.89604	3.65958	4.28076
Sum DB1	HexCer		+H+					QQQ+ SRM Q3mz264	Cer d18:1/17:0	% of total HexCer	%	72.1799	66.0263	63.1732	64.6172	61.9604	66.6958	62.54	61.9048	62.9238	61.6813	59.4098	59.8055	62.0269	57.027	56.5018	58.2565	55.3921	56.7283	57.8849	57.1544	55.5538	55.9596	55.0249	54.9975	54.7534	49.4136	51.9194	49.9533	53.7285	53.2012	52.5458	58.2319	62.6592	58.7099	55.7048	55.2495	55.7606
Sum DB2	HexCer		+H+					QQQ+ SRM Q3mz264	Cer d18:1/17:0	% of total HexCer	%	27.8201	33.9737	36.8268	35.3828	38.0396	33.3042	37.46	38.0952	37.0762	38.3187	40.5902	40.1945	37.9731	42.973	43.4982	41.7435	44.6079	43.2717	42.1151	42.8456	44.4462	44.0404	44.9751	45.0025	45.2466	50.5864	48.0806	50.0467	46.2715	46.7988	47.4542	41.7681	37.3408	41.2901	44.2952	44.7505	44.2394
Sum Total	HexCer		+H+					QQQ+ SRM Q3mz264	Cer d18:1/17:0	% of total HexCer	%	100	100	100	100	100	100	100	100	100	100	100	100	100	100	100	100	100	100	100	100	100	100	100	100	100	100	100	100	100	100	100	100	100	100	100	100	100
PE P-16:0/16:0	PE P	C37H75N1O7P1	+H+	676.528	32	1	0	QQQ+ SRM PE O-fragm	PE 40:0	Concentration	nmol/mg protein	0	0.040501	0.0505333	0.0423055	0.0351398	0.0488988	0.0301952	0.0240574	0.0192215	0.039859	0.0231905	0.0406644	0.0276751	0.0645054	0.0728832	0.0559562	0.0254755	0.0471397	0.0376151	0.0490835	0.032054	0.0227931	0.0464233	0.0316591	0.0309864	0.0204433	0.0442301	0.0262333	0.0434179	0.0736509	0.0346501	0.0683606	0.0507528	0.0632113	0.0300902	0.0260192	0.0207065
PE P-16:0/16:1	PE P	C37H73N1O7P1	+H+	674.512	32	2	0	QQQ+ SRM PE O-fragm	PE 40:0	Concentration	nmol/mg protein	0	0.0392312	0.0280265	0.0348322	0.0349768	0.0339869	0.0220525	0.0464764	0.0281065	0.0486273	0.0304686	0.0529511	0.0445468	0.190568	0.224807	0.178247	0.0895062	0.110539	0.121032	0.0482857	0.03472	0.0175682	0.202539	0.208229	0.181464	0.0821871	0.118487	0.0846799	0.0421428	0.0618999	0.0218562	0.176807	0.132389	0.127682	0.0400096	0.0366161	0.0289035
PE P-16:0/18:0	PE P	C39H79N1O7P1	+H+	704.559	34	1	0	QQQ+ SRM PE O-fragm	PE 40:0	Concentration	nmol/mg protein	0.000239611	3.53697e-05	0.00269858	0.0202397	0.00667037	0.0153265	0.00406299	0	0.00378521	0.0078991	0.00830507	0.00212371	0.00891582	0.00725018	0.0180272	0.00422777	0.00366899	0.0172447	0.00798473	0.00213096	0.0223257	0.00306376	0.00390192	0.0204006	0.00493688	0.0102231	0.0286856	0.00779987	0.0157209	0.0143819	0.00387495	0.00326469	0.0155114	0.00529162	0.0190534	0.0100971	0.000556178
PE P-16:0/18:1	PE P	C39H77N1O7P1	+H+	702.543	34	2	0	QQQ+ SRM PE O-fragm	PE 40:0	Concentration	nmol/mg protein	0	0.995767	0.826383	0.901683	0.774206	0.67524	0.594615	0.757184	0.658373	1.09508	1.18565	2.16261	1.39237	2.44095	2.8575	2.07337	1.54703	1.84494	1.62758	2.24273	1.66849	1.30401	3.27758	2.97461	2.78158	1.77267	3.02013	1.96006	1.50493	2.1768	1.4829	2.11908	1.99745	1.75896	1.27268	1.04744	0.985401
PE P-16:0/18:2	PE P	C39H75N1O7P1	+H+	700.528	34	3	0	QQQ+ SRM PE O-fragm	PE 40:0	Concentration	nmol/mg protein	0	0.0483283	0.0491872	0.058295	0.035442	0.0303851	0.0482753	0.0531352	0.0460378	0.0612828	0.0423835	0.0997957	0.0682586	0.145616	0.152684	0.136585	0.0781793	0.0816439	0.083701	0.0746998	0.0672008	0.0508004	0.165929	0.156469	0.146312	0.0868507	0.145808	0.0748509	0.0447913	0.0792354	0.056091	0.150522	0.14524	0.125353	0.0596579	0.0453974	0.0509478
PE P-16:0/18:3	PE P	C39H73N1O7P1	+H+	698.512	34	4	0	QQQ+ SRM PE O-fragm	PE 40:0	Concentration	nmol/mg protein	0	0.00828702	0.0071745	0.0124178	0.00546356	0.00951867	0.00581282	0.0163487	0.00385575	0.0105573	0.00548402	0.0216607	0.0128799	0.0324824	0.0623876	0.036368	0.0179743	0.017204	0.0153121	0.00941806	0.00559655	0.0076277	0.0390227	0.0436288	0.046661	0.0220551	0.0173127	0.0180657	0.00917472	0.0213843	0.00457393	0.0364644	0.022115	0.036809	0.0142138	0.00978956	0.0101386
PE P-16:0/20:3	PE P	C41H77N1O7P1	+H+	726.543	36	4	0	QQQ+ SRM PE O-fragm	PE 40:0	Concentration	nmol/mg protein	0	0.185724	0.134051	0.181799	0.165617	0.121268	0.124486	0.169266	0.17384	0.235071	0.236918	0.511179	0.360822	1.16511	1.38299	0.921349	0.61289	0.752215	0.647714	0.287983	0.265382	0.198891	2.03337	1.65725	1.62091	0.760041	1.24752	0.857552	0.192535	0.229925	0.2157	2.08945	1.88861	1.70221	0.571385	0.42902	0.440745
PE P-16:0/20:4	PE P	C41H75N1O7P1	+H+	724.528	36	5	0	QQQ+ SRM PE O-fragm	PE 40:0	Concentration	nmol/mg protein	0	2.39695	1.90232	2.10765	1.98678	1.884	1.54243	1.54173	1.32458	2.19597	1.74326	3.34555	2.12032	2.82204	3.26222	2.30627	2.20036	2.42697	2.23624	3.33156	2.4201	1.91297	3.6836	3.17673	2.81136	2.03933	3.30023	2.25094	1.84604	2.81038	1.87544	2.22633	2.0433	2.20084	2.06291	1.6096	1.50398
PE P-16:0/20:5	PE P	C41H73N1O7P1	+H+	722.512	36	6	0	QQQ+ SRM PE O-fragm	PE 40:0	Concentration	nmol/mg protein	0	0.328048	0.26509	0.314268	0.29492	0.266146	0.210631	0.236308	0.212965	0.32355	0.116425	0.249466	0.175194	0.197274	0.234338	0.192351	0.168136	0.160997	0.138272	0.1751	0.121703	0.0904748	0.19578	0.211431	0.163717	0.100115	0.157771	0.108381	0.0697008	0.114898	0.0847701	0.19599	0.162155	0.235091	0.178614	0.143969	0.17343
PE P-16:0/22:3	PE P	C43H81N1O7P1	+H+	754.575	38	4	0	QQQ+ SRM PE O-fragm	PE 40:0	Concentration	nmol/mg protein	0	0.129988	0.097758	0.0886356	0.08076	0.100187	0.0752905	0.145768	0.134893	0.168136	0.182293	0.292287	0.171475	1.11854	1.34809	0.970464	0.624482	0.737512	0.725749	0.349107	0.188507	0.161624	1.92987	1.61767	1.57494	0.925676	1.51335	0.990207	0.281666	0.383355	0.221395	1.23988	1.15008	0.952002	0.69674	0.52981	0.490881
PE P-16:0/22:4	PE P	C43H79N1O7P1	+H+	752.559	38	5	0	QQQ+ SRM PE O-fragm	PE 40:0	Concentration	nmol/mg protein	0	0.363263	0.336632	0.350255	0.297656	0.295121	0.233805	0.267565	0.222131	0.371244	0.203421	0.415356	0.23106	0.601146	0.786162	0.500122	0.382291	0.45829	0.386245	0.426492	0.307935	0.224451	0.748108	0.658857	0.666217	0.353781	0.579592	0.362899	0.456348	0.636528	0.454585	0.350678	0.333282	0.302773	0.300809	0.24493	0.196317
PE P-16:0/22:5	PE P	C43H77N1O7P1	+H+	750.543	38	6	0	QQQ+ SRM PE O-fragm	PE 40:0	Concentration	nmol/mg protein	0	1.12244	0.867975	0.985956	0.927225	0.90853	0.780625	0.819382	0.729278	1.14798	0.442948	0.834398	0.524015	1.23344	1.38372	0.990401	0.763744	0.849314	0.831957	0.674631	0.491115	0.429055	1.26696	1.12722	1.0742	0.591974	1.00109	0.613386	0.532086	0.687465	0.518022	0.730931	0.674719	0.650143	0.458811	0.346625	0.314248
PE P-16:0/22:6	PE P	C43H75N1O7P1	+H+	748.528	38	7	0	QQQ+ SRM PE O-fragm	PE 40:0	Concentration	nmol/mg protein	0	2.81573	2.36289	2.69237	2.2874	2.17508	1.76364	2.05597	1.71502	2.67517	1.32554	2.53329	1.56464	2.34629	2.65609	1.92034	1.71959	1.96086	1.76583	2.56048	1.93567	1.53052	2.86144	2.45218	2.32562	1.69421	2.70221	1.75453	1.864	2.58641	1.69534	1.52121	1.34762	1.30812	1.59855	1.19733	1.06824
PE P-18:1/16:0	PE P	C39H77N1O7P1	+H+	702.543	34	2	0	QQQ+ SRM PE O-fragm	PE 40:0	Concentration	nmol/mg protein	0.00195241	0.310098	0.292028	0.316896	0.291041	0.226948	0.200718	0.215217	0.161311	0.273804	0.15102	0.275527	0.1596	0.396473	0.401661	0.33882	0.221075	0.253713	0.228091	0.291313	0.230307	0.155665	0.324085	0.2611	0.215066	0.175732	0.327513	0.217543	0.321834	0.442235	0.239854	0.253437	0.250292	0.238692	0.218787	0.1541	0.152762
PE P-18:1/16:1	PE P	C39H75N1O7P1	+H+	700.528	34	3	0	QQQ+ SRM PE O-fragm	PE 40:0	Concentration	nmol/mg protein	0	0.0516395	0.0436729	0.049993	0.0547975	0.0392577	0.0496001	0.0537611	0.0473012	0.0543983	0.0471551	0.10508	0.0459342	0.202595	0.24315	0.132691	0.123357	0.135308	0.123836	0.0774885	0.0566649	0.0321908	0.214648	0.195308	0.199134	0.115803	0.201272	0.138199	0.0846803	0.107964	0.0799128	0.150994	0.14474	0.114531	0.0658006	0.0472502	0.0337395
PE P-18:1/18:0	PE P	C41H81N1O7P1	+H+	730.575	36	2	0	QQQ+ SRM PE O-fragm	PE 40:0	Concentration	nmol/mg protein	0	0.00442271	0.0184143	0.00645783	0.00415625	0.0026098	0.00559823	0.0177312	0.00525933	0	0.0139833	0.0184056	0.0113052	0.021197	0.011729	0.00543853	0.0215596	0.0084408	0.00779676	0.0246731	0.026949	0.0209477	0.0124305	0.0318663	0.0134424	0.0266123	0	0.0156145	0.0303568	0.0401487	0.0263806	0.014737	0.0151528	0.00510416	0.0219091	0.0139932	0.00371415
PE P-18:1/18:1	PE P	C41H79N1O7P1	+H+	728.559	36	3	0	QQQ+ SRM PE O-fragm	PE 40:0	Concentration	nmol/mg protein	0	0.392521	0.33815	0.371535	0.332083	0.335943	0.233701	0.297699	0.284121	0.472319	0.587249	1.16087	0.68759	1.15932	1.36981	0.927575	0.716649	0.861322	0.738466	1.47561	1.08309	0.868544	1.79271	1.53508	1.46222	1.03916	1.76701	1.14863	1.38583	2.07239	1.30374	1.58387	1.44238	1.20923	0.850349	0.736579	0.701863
PE P-18:1/18:2	PE P	C41H77N1O7P1	+H+	726.543	36	4	0	QQQ+ SRM PE O-fragm	PE 40:0	Concentration	nmol/mg protein	0	0.0399959	0.0290713	0.0312505	0.0222356	0.0250041	0.0203949	0.0383708	0.0226063	0.0483056	0.0314893	0.0582978	0.0412859	0.0874853	0.100727	0.0708758	0.0410367	0.0575998	0.0483997	0.0521949	0.0484748	0.025482	0.101174	0.0997041	0.0885414	0.0437795	0.0830737	0.0589914	0.0507287	0.0756247	0.0486286	0.149209	0.120108	0.126251	0.0534674	0.0430568	0.0294634
PE P-18:1/18:3	PE P	C41H75N1O7P1	+H+	724.528	36	5	0	QQQ+ SRM PE O-fragm	PE 40:0	Concentration	nmol/mg protein	0	0.0053435	0.0023701	0.00635758	0.00653594	0.00402992	0.00443252	0.00827965	0.00905974	0.0114405	0.00794394	0.0122034	0.0100994	0.0206969	0.0309058	0.0195384	0.0137382	0.0118745	0.0127196	0.0112525	0.0208767	0.00479247	0.0350876	0.0181021	0.036741	0.0145291	0.0117585	0.0145748	0.00721905	0.0103838	0.00827866	0.0266532	0.0236518	0.0212924	0.0125632	0.00856582	0.00885487
PE P-18:1/20:3	PE P	C43H79N1O7P1	+H+	752.559	38	5	0	QQQ+ SRM PE O-fragm	PE 40:0	Concentration	nmol/mg protein	0	0.0866992	0.0584721	0.0707936	0.0760822	0.047896	0.047419	0.066961	0.0604854	0.0834518	0.128742	0.234716	0.140693	0.462136	0.55206	0.382946	0.256283	0.290946	0.302007	0.20714	0.161537	0.121172	0.964	0.834872	0.682405	0.411439	0.735234	0.483293	0.170717	0.220079	0.150819	1.29275	1.25064	1.11363	0.412049	0.306153	0.277017
PE P-18:1/20:4	PE P	C43H77N1O7P1	+H+	750.543	38	6	0	QQQ+ SRM PE O-fragm	PE 40:0	Concentration	nmol/mg protein	0	0.969709	0.773203	0.850347	0.802645	0.772379	0.635181	0.596601	0.516708	0.93605	0.879362	1.84415	1.06237	1.19782	1.35186	0.98951	0.99036	1.10141	1.03771	2.12213	1.63684	1.40044	1.78286	1.54067	1.32666	1.15844	2.02996	1.25689	1.69855	2.25145	1.62974	1.5481	1.41596	1.40904	1.60652	1.25378	1.16739
PE P-18:1/20:5	PE P	C43H75N1O7P1	+H+	748.528	38	7	0	QQQ+ SRM PE O-fragm	PE 40:0	Concentration	nmol/mg protein	0	0.13826	0.106685	0.119216	0.121811	0.105077	0.0887525	0.0897767	0.0649016	0.126526	0.0775618	0.141869	0.0677895	0.0801149	0.0989603	0.073461	0.0634813	0.0636656	0.0597049	0.10076	0.0958946	0.0685516	0.107418	0.0838093	0.0686024	0.0432099	0.0797484	0.048815	0.0631378	0.0926474	0.0710998	0.123996	0.110603	0.137434	0.160444	0.113558	0.129161
PE P-18:1/22:3	PE P	C45H83N1O7P1	+H+	780.59	40	5	0	QQQ+ SRM PE O-fragm	PE 40:0	Concentration	nmol/mg protein	0	0.0367149	0.0370652	0.0383667	0.0327604	0.0347844	0.0279595	0.0599335	0.0557787	0.0806014	0.0736441	0.159891	0.0955181	0.361671	0.454829	0.328375	0.243209	0.297929	0.255505	0.156032	0.144864	0.082677	0.686062	0.590644	0.491651	0.418502	0.70441	0.434966	0.21044	0.24128	0.163959	0.54797	0.481351	0.46379	0.398193	0.293684	0.255265
PE P-18:1/22:4	PE P	C45H81N1O7P1	+H+	778.575	40	6	0	QQQ+ SRM PE O-fragm	PE 40:0	Concentration	nmol/mg protein	0	0.13075	0.0822767	0.110167	0.0919981	0.0620165	0.0609442	0.0671919	0.0564006	0.0950668	0.0710356	0.131571	0.0849028	0.164967	0.211939	0.165599	0.117	0.146402	0.114314	0.216696	0.16223	0.145136	0.209435	0.211676	0.176687	0.163165	0.28893	0.178349	0.382973	0.36679	0.244137	0.143808	0.130731	0.116076	0.125802	0.0938112	0.0884602
PE P-18:1/22:5	PE P	C45H79N1O7P1	+H+	776.559	40	7	0	QQQ+ SRM PE O-fragm	PE 40:0	Concentration	nmol/mg protein	0	0.263884	0.210192	0.239554	0.217769	0.210606	0.180528	0.183384	0.173171	0.265831	0.166127	0.323289	0.1799	0.301171	0.342184	0.244307	0.204827	0.246339	0.203027	0.310571	0.224616	0.198743	0.364675	0.322858	0.320819	0.213538	0.377428	0.232936	0.375675	0.380547	0.213083	0.295093	0.239919	0.251544	0.207626	0.139337	0.143722
PE P-18:1/22:6	PE P	C45H77N1O7P1	+H+	774.543	40	8	0	QQQ+ SRM PE O-fragm	PE 40:0	Concentration	nmol/mg protein	0	0.994032	0.777743	0.866622	0.731112	0.725315	0.615036	0.575715	0.527147	0.856651	0.591631	1.18565	0.766925	0.848681	1.01284	0.712759	0.68341	0.823742	0.702373	1.49984	1.15952	0.899523	1.15901	0.992328	0.914084	0.786096	1.36419	0.851774	1.0903	1.6391	1.10091	0.809418	0.719899	0.701368	0.7896	0.639521	0.563491
PE P-18:0/16:0	PE P	C39H79N1O7P1	+H+	704.559	34	1	0	QQQ+ SRM PE O-fragm	PE 40:0	Concentration	nmol/mg protein	0	0.106071	0.0673435	0.084833	0.0494861	0.0447352	0.0478315	0.0298584	0.0223871	0.0546984	0.0262054	0.0527517	0.033018	0.094899	0.0859721	0.0631884	0.0536356	0.057375	0.0460924	0.0660072	0.0541414	0.0340053	0.0505924	0.07334	0.0541849	0.0404691	0.079473	0.0379603	0.0699827	0.0845565	0.0681667	0.0868667	0.0606778	0.0687245	0.0719261	0.0473655	0.04098
PE P-18:0/16:1	PE P	C39H77N1O7P1	+H+	702.543	34	2	0	QQQ+ SRM PE O-fragm	PE 40:0	Concentration	nmol/mg protein	0	0.0562435	0.053175	0.0453049	0.0383442	0.0322915	0.0303942	0.039599	0.0258603	0.0415228	0.039458	0.0725829	0.0461185	0.154598	0.12063	0.123581	0.0774258	0.0830523	0.0757961	0.056559	0.0381241	0.0290483	0.222033	0.163187	0.142676	0.0622024	0.108818	0.0870909	0.040432	0.0909467	0.0396835	0.11372	0.0895225	0.0962581	0.0501116	0.0328158	0.0410615
PE P-18:0/18:0	PE P	C41H83N1O7P1	+H+	732.59	36	1	0	QQQ+ SRM PE O-fragm	PE 40:0	Concentration	nmol/mg protein	0	0.0162194	0.0283521	0.012819	0.0145679	0.00599855	0.00235887	0	0	0.00118071	0.00785664	0.0142626	0.0059719	0.00923449	0.00021443	0.00969777	0.0200338	0.00953655	0.0115446	0.0247216	0.0211109	0.0160189	0.0142564	0.0127818	0	0.0119941	0.0267734	0.00675041	0.0137388	0.0199731	0.0310688	0.0080238	0.00690635	0.00360552	0.00770011	0.00747075	0.000366537
PE P-18:0/18:1	PE P	C41H81N1O7P1	+H+	730.575	36	2	0	QQQ+ SRM PE O-fragm	PE 40:0	Concentration	nmol/mg protein	0	0.395373	0.336507	0.391635	0.315521	0.287461	0.232759	0.290877	0.270551	0.40029	0.478511	0.926466	0.529207	0.80682	0.947245	0.626718	0.503245	0.593098	0.572347	1.15641	0.837019	0.653177	1.22535	1.05671	1.01052	0.597838	1.1403	0.674847	0.914787	1.36639	0.927158	0.995095	0.933412	0.757412	0.589889	0.487233	0.435741
PE P-18:0/18:2	PE P	C41H79N1O7P1	+H+	728.559	36	3	0	QQQ+ SRM PE O-fragm	PE 40:0	Concentration	nmol/mg protein	0	0.0377745	0.0233216	0.0399875	0.0410349	0.0347499	0.0271851	0.033907	0.019337	0.0325231	0.0371231	0.0662296	0.0321067	0.0675493	0.0810896	0.055039	0.0268297	0.0399634	0.0404865	0.0601536	0.0476693	0.0356395	0.130375	0.0900395	0.0807052	0.0380911	0.0853547	0.0548137	0.0382163	0.0618483	0.0446348	0.0846825	0.116791	0.108444	0.0427629	0.0352427	0.0249126
PE P-18:0/18:3	PE P	C41H77N1O7P1	+H+	726.543	36	4	0	QQQ+ SRM PE O-fragm	PE 40:0	Concentration	nmol/mg protein	0	0.0124049	0.00740492	0.00574241	0.00297077	0.0030384	0.00334139	0.00413492	0.00937746	0.00816841	0.0024978	0.0120217	0.00327346	0.0158462	0.0181734	0.0277028	0.0169168	0.0126739	0.0135427	0.0130161	0.00607934	0.00727709	0.0245119	0.0217102	0.0295528	0.00656009	0.0200266	0.0146694	0.00649821	0.00876557	0.00709701	0.0294858	0.0282777	0.0284613	0.0135477	0.0235126	0.00736741
PE P-18:0/20:3	PE P	C43H81N1O7P1	+H+	754.575	38	4	0	QQQ+ SRM PE O-fragm	PE 40:0	Concentration	nmol/mg protein	0	0.142616	0.109553	0.109046	0.0950925	0.0890463	0.0629306	0.0893336	0.104725	0.154937	0.189677	0.308569	0.230444	0.552307	0.673136	0.476695	0.32714	0.387128	0.362158	0.323833	0.26876	0.178673	1.28899	1.03658	0.890592	0.471027	0.802296	0.498468	0.201963	0.25609	0.178418	1.62678	1.42904	1.43112	0.522817	0.370096	0.337749
PE P-18:0/20:4	PE P	C43H79N1O7P1	+H+	752.559	38	5	0	QQQ+ SRM PE O-fragm	PE 40:0	Concentration	nmol/mg protein	0	1.7939	1.48386	1.67913	1.44423	1.41923	1.18751	1.07766	0.941436	1.53663	1.36706	2.75706	1.71268	1.67215	1.98906	1.39106	1.39608	1.54872	1.35	3.35667	2.51139	2.05482	2.53319	2.21015	1.90446	1.49678	2.51226	1.57856	2.0316	2.89366	2.01704	1.86943	1.68682	1.74952	2.2682	1.71403	1.6743
PE P-18:0/20:5	PE P	C43H77N1O7P1	+H+	750.543	38	6	0	QQQ+ SRM PE O-fragm	PE 40:0	Concentration	nmol/mg protein	0	0.271747	0.187565	0.23718	0.220095	0.207022	0.153778	0.163843	0.148564	0.227594	0.107058	0.200839	0.128034	0.111766	0.155632	0.0914703	0.121201	0.106116	0.11363	0.176195	0.118609	0.092458	0.147141	0.124172	0.12218	0.0767127	0.107498	0.0795767	0.107216	0.133995	0.0792082	0.148514	0.128492	0.168512	0.231198	0.159515	0.186112
PE P-18:0/22:3	PE P	C45H85N1O7P1	+H+	782.606	40	4	0	QQQ+ SRM PE O-fragm	PE 40:0	Concentration	nmol/mg protein	0	0.0436459	0.0552193	0.0492393	0.036383	0.0448143	0.0270404	0.0562034	0.0536663	0.0840867	0.103382	0.180258	0.0987449	0.373001	0.460074	0.32537	0.27095	0.257604	0.24463	0.207353	0.150863	0.125235	0.876116	0.700476	0.681133	0.49193	0.809199	0.503983	0.178977	0.256595	0.161464	0.762385	0.672158	0.604347	0.53978	0.382716	0.342489
PE P-18:0/22:4	PE P	C45H83N1O7P1	+H+	780.59	40	5	0	QQQ+ SRM PE O-fragm	PE 40:0	Concentration	nmol/mg protein	0	0.193212	0.176604	0.18078	0.149337	0.144323	0.121148	0.13722	0.115752	0.185493	0.123193	0.223674	0.1485	0.248805	0.266204	0.169615	0.164474	0.191652	0.173011	0.319799	0.193673	0.186663	0.38716	0.307062	0.280697	0.163759	0.330463	0.216385	0.301742	0.444604	0.292788	0.210403	0.169685	0.182307	0.18216	0.146161	0.140544
PE P-18:0/22:5	PE P	C45H81N1O7P1	+H+	778.575	40	6	0	QQQ+ SRM PE O-fragm	PE 40:0	Concentration	nmol/mg protein	0	0.655055	0.588552	0.622301	0.541686	0.525931	0.422084	0.371667	0.370381	0.583699	0.281679	0.507002	0.343175	0.494901	0.570534	0.482007	0.377815	0.471972	0.422491	0.516213	0.409097	0.290935	0.728563	0.637109	0.519669	0.37067	0.607023	0.354991	0.335025	0.511754	0.365202	0.467896	0.401479	0.39102	0.356588	0.262038	0.23255
PE P-18:0/22:6	PE P	C45H79N1O7P1	+H+	776.559	40	7	0	QQQ+ SRM PE O-fragm	PE 40:0	Concentration	nmol/mg protein	0	1.80681	1.495	1.54964	1.34915	1.17787	1.00229	1.02619	0.936751	1.41569	0.895314	1.71019	1.05896	1.14127	1.34582	0.945095	0.879525	1.02894	0.937639	2.14008	1.58005	1.20894	1.50244	1.41189	1.23627	0.895417	1.60075	0.904399	1.32836	1.95445	1.33314	0.980911	0.860007	0.87938	1.22161	0.913638	0.814697
Sum C32	PE P		+H+					QQQ+ SRM PE O-fragm	PE 40:0	Concentration	nmol/mg protein		0.0797322	0.0785598	0.0771378	0.0701166	0.0828857	0.0522477	0.0705339	0.0473281	0.0884863	0.0536591	0.0936154	0.0722218	0.255073	0.297691	0.234203	0.114982	0.157679	0.158647	0.0973692	0.0667741	0.0403613	0.248962	0.239888	0.21245	0.10263	0.162718	0.110913	0.0855607	0.135551	0.0565063	0.245168	0.183141	0.190893	0.0700998	0.0626353	0.04961
Sum C34	PE P		+H+					QQQ+ SRM PE O-fragm	PE 40:0	Concentration	nmol/mg protein	0.00219202	1.57647	1.34166	1.48966	1.25545	1.0737	0.981309	1.1651	0.968911	1.59924	1.50566	2.79213	1.7671	3.47487	3.94201	2.90883	2.12234	2.49048	2.20839	2.82035	2.14285	1.61641	4.2978	3.88804	3.59055	2.286	3.92901	2.54157	2.09155	3.01751	1.97506	2.91434	2.72555	2.44462	1.77223	1.39426	1.31559
Sum C36	PE P		+H+					QQQ+ SRM PE O-fragm	PE 40:0	Concentration	nmol/mg protein		3.81478	3.08505	3.4695	3.18642	2.97025	2.40731	2.63831	2.33169	3.72882	3.26326	6.37495	3.97717	6.37257	7.43944	5.16255	4.34139	4.93469	4.46753	6.61267	4.89845	3.83422	9.24864	7.91141	7.31771	4.67805	7.83982	5.20577	4.55565	6.81073	4.5729	7.40353	6.78074	6.39794	4.40509	3.53825	3.33043
Sum C38	PE P		+H+					QQQ+ SRM PE O-fragm	PE 40:0	Concentration	nmol/mg protein		7.83434	6.38459	7.18294	6.353	6.11957	5.02893	5.37286	4.63815	7.42772	4.90366	9.56254	5.8332	9.37572	10.9948	7.78647	6.64465	7.50395	6.93499	10.2974	7.71625	6.26176	13.63	11.6862	10.6359	7.22325	12.0632	7.66662	7.40728	10.1417	7.01567	10.4523	9.52726	9.22231	8.25614	6.23582	5.84141
Sum C40	PE P		+H+					QQQ+ SRM PE O-fragm	PE 40:0	Concentration	nmol/mg protein		4.1241	3.42266	3.65667	3.15019	2.92566	2.45703	2.47751	2.28905	3.56712	2.30601	4.42152	2.77663	3.93447	4.66442	3.37313	2.94121	3.46458	3.05299	5.36659	4.02491	3.13785	5.91347	5.17404	4.62101	3.50308	6.08239	3.67778	4.20349	5.79512	3.87468	4.21788	3.67523	3.58983	3.82136	2.87091	2.58122
Sum DB1	PE P		+H+					QQQ+ SRM PE O-fragm	PE 40:0	Concentration	nmol/mg protein	0.000239611	0.162826	0.148927	0.160197	0.105864	0.114959	0.0844485	0.0539158	0.0453939	0.103637	0.0655576	0.109802	0.0755808	0.175889	0.177097	0.13307	0.102814	0.131296	0.103237	0.141943	0.129632	0.0758811	0.115174	0.138181	0.0901082	0.0831296	0.179162	0.0787439	0.14286	0.192562	0.137761	0.166516	0.133848	0.140833	0.12877	0.0909526	0.0626092
Sum DB2	PE P		+H+					QQQ+ SRM PE O-fragm	PE 40:0	Concentration	nmol/mg protein	0.00195241	1.80113	1.55453	1.69681	1.45825	1.25854	1.08614	1.36709	1.14946	1.85932	1.89909	3.50854	2.18315	4.01061	4.56357	3.34618	2.45984	2.89378	2.63264	3.81997	2.83561	2.18041	5.26402	4.6957	4.34475	2.71724	4.71524	3.03984	2.85448	4.17843	2.73783	3.67287	3.41822	2.98411	2.19338	1.7722	1.64758
Sum DB3	PE P		+H+					QQQ+ SRM PE O-fragm	PE 40:0	Concentration	nmol/mg protein		0.530264	0.454332	0.519811	0.463357	0.440336	0.358761	0.438502	0.396797	0.620523	0.713911	1.43197	0.833889	1.57508	1.84673	1.25189	0.945015	1.11824	0.98649	1.68795	1.25463	0.987175	2.30366	1.97689	1.88837	1.2799	2.19945	1.4165	1.55352	2.32144	1.48438	1.97007	1.84915	1.55756	1.01857	0.864469	0.811463
Sum DB4	PE P		+H+					QQQ+ SRM PE O-fragm	PE 40:0	Concentration	nmol/mg protein		0.562662	0.440232	0.478131	0.408522	0.392877	0.319296	0.519426	0.502963	0.709262	0.751741	1.38427	0.918924	3.34477	4.04558	2.82882	1.91139	2.22194	2.05751	1.2429	0.933663	0.704809	6.29306	5.17703	4.93232	2.72107	4.49277	2.94194	0.921543	1.23174	0.837278	5.93365	5.31039	4.8812	2.41195	1.788	1.65883
Sum DB5	PE P		+H+					QQQ+ SRM PE O-fragm	PE 40:0	Concentration	nmol/mg protein		4.87608	3.99732	4.43334	3.99339	3.82938	3.1647	3.15936	2.72922	4.46484	3.64727	7.14845	4.45887	6.18864	7.34144	5.09792	4.65643	5.22637	4.71573	7.80894	5.76037	4.58755	9.03721	7.79642	6.87353	4.89813	8.17395	5.34162	5.0241	7.25691	4.96291	6.52421	5.98873	6.03416	5.63688	4.32313	4.05627
Sum DB6	PE P		+H+					QQQ+ SRM PE O-fragm	PE 40:0	Concentration	nmol/mg protein		3.47775	2.76466	3.12022	2.87857	2.74202	2.26324	2.25499	2.0343	3.31394	1.89851	3.76743	2.31769	3.40017	3.90802	2.91134	2.53825	2.83621	2.65837	3.88096	2.9396	2.4485	4.33074	3.85228	3.38311	2.46108	4.19227	2.59157	3.12555	4.06635	2.92108	3.23523	2.91353	2.96988	2.95753	2.25974	2.16219
Sum DB7	PE P		+H+					QQQ+ SRM PE O-fragm	PE 40:0	Concentration	nmol/mg protein		5.02468	4.17477	4.60078	3.97613	3.66862	3.03521	3.35532	2.88985	4.48322	2.46454	4.70864	2.87129	3.86885	4.44305	3.1832	2.86743	3.2998	2.9662	5.11189	3.83623	3.00675	4.83598	4.27074	3.95132	2.84637	4.76013	2.94068	3.63117	5.01405	3.31266	2.92121	2.55815	2.57648	3.18823	2.36386	2.15582
Sum DB8	PE P		+H+					QQQ+ SRM PE O-fragm	PE 40:0	Concentration	nmol/mg protein		0.994032	0.777743	0.866622	0.731112	0.725315	0.615036	0.575715	0.527147	0.856651	0.591631	1.18565	0.766925	0.848681	1.01284	0.712759	0.68341	0.823742	0.702373	1.49984	1.15952	0.899523	1.15901	0.992328	0.914084	0.786096	1.36419	0.851774	1.0903	1.6391	1.10091	0.809418	0.719899	0.701368	0.7896	0.639521	0.563491
Sum Total	PE P		+H+					QQQ+ SRM PE O-fragm	PE 40:0	Concentration	nmol/mg protein	0.00219202	17.4294	14.3125	15.8759	14.0152	13.1721	10.9268	11.7243	10.2751	16.4114	12.0322	23.2448	14.4263	23.4127	27.3383	19.4652	16.1646	18.5514	16.8225	25.1944	18.8492	14.8906	33.3389	28.8996	26.3776	17.793	30.0772	19.2027	18.3435	25.9006	17.4948	25.2332	22.8919	21.8456	18.3249	14.1019	13.1183
PE P-16:0/16:0	PE P	C37H75N1O7P1	+H+	676.528	32	1	0	QQQ+ SRM PE O-fragm	PE 40:0	% of total PE P	%	0	0.232372	0.353071	0.266476	0.250727	0.371231	0.27634	0.205193	0.187068	0.242874	0.192736	0.17494	0.191837	0.275514	0.266597	0.287468	0.157601	0.254104	0.223599	0.194819	0.170055	0.15307	0.139247	0.109549	0.117472	0.114895	0.147055	0.136613	0.236693	0.28436	0.198059	0.270916	0.221706	0.289355	0.164204	0.184509	0.157845
PE P-16:0/16:1	PE P	C37H73N1O7P1	+H+	674.512	32	2	0	QQQ+ SRM PE O-fragm	PE 40:0	% of total PE P	%	0	0.225086	0.195818	0.219403	0.249564	0.258023	0.20182	0.39641	0.27354	0.296302	0.253225	0.227798	0.308788	0.813952	0.822315	0.91572	0.553718	0.595855	0.719463	0.191653	0.184199	0.117982	0.607516	0.720528	0.687948	0.461907	0.393945	0.44098	0.229742	0.238991	0.124929	0.700694	0.57832	0.584475	0.218334	0.259654	0.220331
PE P-16:0/18:0	PE P	C39H79N1O7P1	+H+	704.559	34	1	0	QQQ+ SRM PE O-fragm	PE 40:0	% of total PE P	%	10.9311	0.000202931	0.0188547	0.127487	0.0475939	0.116356	0.0371836	0	0.0368385	0.0481318	0.0690234	0.0091363	0.0618024	0.0309669	0.0659411	0.0217197	0.0226977	0.0929566	0.0474644	0.00845809	0.118444	0.0205751	0.0117038	0.0705914	0.0187162	0.0574556	0.0953732	0.0406187	0.0857029	0.0555275	0.0221491	0.0129381	0.0677592	0.0242228	0.103975	0.0716013	0.00423973
PE P-16:0/18:1	PE P	C39H77N1O7P1	+H+	702.543	34	2	0	QQQ+ SRM PE O-fragm	PE 40:0	% of total PE P	%	0	5.71313	5.77385	5.67957	5.52405	5.12631	5.44178	6.45824	6.40745	6.67267	9.85393	9.30363	9.65162	10.4258	10.4524	10.6517	9.57048	9.94502	9.67499	8.9017	8.85176	8.75726	9.83112	10.2929	10.5452	9.96271	10.0413	10.2072	8.20415	8.40445	8.47624	8.39797	8.72558	8.0518	6.94506	7.42768	7.51167
PE P-16:0/18:2	PE P	C39H75N1O7P1	+H+	700.528	34	3	0	QQQ+ SRM PE O-fragm	PE 40:0	% of total PE P	%	0	0.27728	0.343666	0.367192	0.252883	0.230679	0.441806	0.453205	0.448051	0.373416	0.352249	0.429326	0.473153	0.621951	0.558497	0.701687	0.483646	0.440096	0.497552	0.296494	0.356517	0.341157	0.497706	0.541425	0.554685	0.488117	0.484779	0.389795	0.24418	0.305921	0.320615	0.596523	0.634458	0.573815	0.325556	0.321925	0.388373
PE P-16:0/18:3	PE P	C39H73N1O7P1	+H+	698.512	34	4	0	QQQ+ SRM PE O-fragm	PE 40:0	% of total PE P	%	0	0.0475462	0.0501274	0.078218	0.0389831	0.0722641	0.0531977	0.139443	0.0375251	0.0643291	0.0455777	0.0931854	0.0892805	0.138738	0.228206	0.186836	0.111195	0.092737	0.091021	0.0373815	0.0296911	0.0512249	0.117049	0.150967	0.176897	0.123954	0.0575611	0.0940792	0.0500161	0.082563	0.0261445	0.14451	0.0966061	0.168496	0.0775655	0.0694203	0.0772859
PE P-16:0/20:3	PE P	C41H77N1O7P1	+H+	726.543	36	4	0	QQQ+ SRM PE O-fragm	PE 40:0	% of total PE P	%	0	1.06558	0.936602	1.14513	1.18169	0.920643	1.13926	1.44372	1.69185	1.43236	1.96902	2.19912	2.50113	4.97641	5.05879	4.73332	3.79156	4.05477	3.85027	1.14304	1.40792	1.33568	6.09911	5.73452	6.14501	4.27157	4.14773	4.4658	1.04961	0.887723	1.23294	8.28057	8.25013	7.79199	3.11807	3.04229	3.35978
PE P-16:0/20:4	PE P	C41H75N1O7P1	+H+	724.528	36	5	0	QQQ+ SRM PE O-fragm	PE 40:0	% of total PE P	%	0	13.7523	13.2913	13.2758	14.1759	14.303	14.116	13.1499	12.8911	13.3808	14.4883	14.3927	14.6976	12.0534	11.9328	11.8482	13.6122	13.0824	13.2931	13.2234	12.8392	12.8468	11.049	10.9923	10.6581	11.4614	10.9725	11.722	10.0637	10.8506	10.72	8.82302	8.92584	10.0745	11.2574	11.4141	11.4648
PE P-16:0/20:5	PE P	C41H73N1O7P1	+H+	722.512	36	6	0	QQQ+ SRM PE O-fragm	PE 40:0	% of total PE P	%	0	1.88215	1.85215	1.97952	2.10429	2.02053	1.92765	2.01554	2.07263	1.97149	0.967612	1.07321	1.21441	0.842593	0.857179	0.988179	1.04015	0.867843	0.821942	0.694995	0.645664	0.607596	0.587242	0.731606	0.620666	0.562665	0.524554	0.564408	0.379975	0.443611	0.484544	0.776714	0.708352	1.07615	0.974703	1.02092	1.32205
PE P-16:0/22:3	PE P	C43H81N1O7P1	+H+	754.575	38	4	0	QQQ+ SRM PE O-fragm	PE 40:0	% of total PE P	%	0	0.745793	0.683024	0.558303	0.576232	0.760605	0.689043	1.2433	1.31281	1.02451	1.51503	1.25743	1.18862	4.77749	4.93115	4.98564	3.86327	3.97551	4.31414	1.38565	1.00008	1.08541	5.78865	5.59756	5.97074	5.20247	5.03154	5.15662	1.53551	1.4801	1.26549	4.91367	5.02396	4.35787	3.80214	3.75702	3.74197
PE P-16:0/22:4	PE P	C43H79N1O7P1	+H+	752.559	38	5	0	QQQ+ SRM PE O-fragm	PE 40:0	% of total PE P	%	0	2.08419	2.35201	2.2062	2.12381	2.24051	2.13973	2.28214	2.16183	2.26211	1.69063	1.78688	1.60165	2.5676	2.87568	2.56932	2.36499	2.47038	2.296	1.69281	1.63367	1.50734	2.24395	2.27982	2.52569	1.98831	1.92702	1.88984	2.48779	2.45758	2.5984	1.38975	1.45589	1.38597	1.64153	1.73686	1.49652
PE P-16:0/22:5	PE P	C43H77N1O7P1	+H+	750.543	38	6	0	QQQ+ SRM PE O-fragm	PE 40:0	% of total PE P	%	0	6.43989	6.06445	6.21039	6.61586	6.8974	7.14411	6.98874	7.09751	6.99501	3.68134	3.58962	3.63236	5.26825	5.06147	5.08807	4.7248	4.57817	4.94549	2.6777	2.60549	2.88138	3.80025	3.90047	4.07238	3.327	3.32841	3.19428	2.90068	2.65424	2.961	2.89671	2.94741	2.97608	2.50375	2.45801	2.3955
PE P-16:0/22:6	PE P	C43H75N1O7P1	+H+	748.528	38	7	0	QQQ+ SRM PE O-fragm	PE 40:0	% of total PE P	%	0	16.155	16.5093	16.9589	16.3209	16.5128	16.1405	17.5359	16.691	16.3007	11.0166	10.8983	10.8457	10.0215	9.71562	9.86551	10.638	10.5699	10.4968	10.1629	10.2692	10.2784	8.58291	8.48518	8.81666	9.52176	8.98425	9.13692	10.1616	9.9859	9.69054	6.02861	5.88688	5.98804	8.72339	8.49054	8.14314
PE P-18:1/16:0	PE P	C39H77N1O7P1	+H+	702.543	34	2	0	QQQ+ SRM PE O-fragm	PE 40:0	% of total PE P	%	89.0689	1.77916	2.04036	1.99608	2.07661	1.72295	1.83692	1.83564	1.56991	1.66838	1.25513	1.18533	1.10631	1.69341	1.46922	1.74064	1.36765	1.36762	1.35587	1.15626	1.22184	1.04539	0.972095	0.903473	0.815335	0.987647	1.08891	1.13288	1.75448	1.70743	1.371	1.00438	1.09336	1.09263	1.19393	1.09276	1.1645
PE P-18:1/16:1	PE P	C39H75N1O7P1	+H+	700.528	34	3	0	QQQ+ SRM PE O-fragm	PE 40:0	% of total PE P	%	0	0.296278	0.305137	0.314899	0.390986	0.298038	0.453929	0.458544	0.460347	0.331467	0.391906	0.452061	0.318406	0.86532	0.88941	0.681686	0.76313	0.729371	0.736129	0.307562	0.300621	0.216182	0.643836	0.675816	0.754936	0.650836	0.669185	0.719689	0.461636	0.416838	0.45678	0.598395	0.632276	0.524277	0.359077	0.335063	0.257195
PE P-18:1/18:0	PE P	C41H81N1O7P1	+H+	730.575	36	2	0	QQQ+ SRM PE O-fragm	PE 40:0	% of total PE P	%	0	0.0253749	0.128658	0.0406769	0.0296554	0.0198131	0.0512338	0.151234	0.051185	0	0.116215	0.0791816	0.0783653	0.0905364	0.042903	0.0279398	0.133376	0.0454996	0.0463471	0.0979309	0.142971	0.140677	0.0372854	0.110266	0.0509614	0.149566	0	0.0813144	0.16549	0.155011	0.150791	0.0584032	0.0661927	0.0233647	0.119559	0.0992297	0.0283128
PE P-18:1/18:1	PE P	C41H79N1O7P1	+H+	728.559	36	3	0	QQQ+ SRM PE O-fragm	PE 40:0	% of total PE P	%	0	2.25206	2.36262	2.34025	2.36945	2.55042	2.13878	2.53916	2.76513	2.87799	4.88063	4.99411	4.76622	4.95169	5.01059	4.7653	4.43345	4.6429	4.38974	5.85689	5.74608	5.83283	5.37724	5.31176	5.54341	5.84027	5.87494	5.98164	7.55487	8.00133	7.45215	6.27694	6.30082	5.53535	4.6404	5.22327	5.35028
PE P-18:1/18:2	PE P	C41H77N1O7P1	+H+	726.543	36	4	0	QQQ+ SRM PE O-fragm	PE 40:0	% of total PE P	%	0	0.229474	0.203118	0.196842	0.158654	0.189827	0.18665	0.327275	0.22001	0.294342	0.261707	0.2508	0.286185	0.373666	0.368445	0.364116	0.253868	0.310488	0.287707	0.207168	0.257171	0.171128	0.30347	0.345002	0.335669	0.246049	0.276202	0.307204	0.276548	0.291981	0.27796	0.591322	0.524676	0.577925	0.291774	0.305327	0.224598
PE P-18:1/18:3	PE P	C41H75N1O7P1	+H+	724.528	36	5	0	QQQ+ SRM PE O-fragm	PE 40:0	% of total PE P	%	0	0.0306579	0.0165596	0.0400455	0.0466347	0.0305945	0.0405654	0.0706195	0.0881715	0.069711	0.0660221	0.0524994	0.0700068	0.0884004	0.113049	0.100376	0.0849897	0.0640089	0.0756102	0.0446626	0.110756	0.0321846	0.105245	0.0626378	0.139289	0.081656	0.0390945	0.0758996	0.0393547	0.0400911	0.0473206	0.105628	0.10332	0.0974678	0.0685582	0.0607424	0.0675003
PE P-18:1/20:3	PE P	C43H79N1O7P1	+H+	752.559	38	5	0	QQQ+ SRM PE O-fragm	PE 40:0	% of total PE P	%	0	0.49743	0.408538	0.445918	0.542855	0.363618	0.433968	0.571129	0.588659	0.508499	1.06997	1.00976	0.975249	1.97387	2.01936	1.96734	1.58546	1.56833	1.79525	0.822168	0.856995	0.813751	2.89152	2.88887	2.58706	2.31237	2.44449	2.5168	0.930665	0.849707	0.862079	5.1232	5.46323	5.09774	2.24857	2.17101	2.11169
PE P-18:1/20:4	PE P	C43H77N1O7P1	+H+	750.543	38	6	0	QQQ+ SRM PE O-fragm	PE 40:0	% of total PE P	%	0	5.56363	5.40228	5.35621	5.72697	5.86377	5.81304	5.08858	5.02873	5.70366	7.30837	7.93363	7.36412	5.11612	4.94491	5.08349	6.12673	5.93706	6.16854	8.423	8.68386	9.40484	5.3477	5.33113	5.02951	6.51065	6.74917	6.54539	9.25967	8.69264	9.31558	6.13516	6.1854	6.45	8.76687	8.89088	8.89897
PE P-18:1/20:5	PE P	C43H75N1O7P1	+H+	748.528	38	7	0	QQQ+ SRM PE O-fragm	PE 40:0	% of total PE P	%	0	0.793259	0.745398	0.750921	0.869137	0.797729	0.812243	0.765731	0.631638	0.770964	0.644616	0.610329	0.469901	0.342186	0.361984	0.377397	0.392718	0.343185	0.35491	0.399929	0.508745	0.460368	0.3222	0.290002	0.260078	0.242848	0.265146	0.25421	0.344197	0.357704	0.406405	0.491401	0.483154	0.629115	0.87555	0.805272	0.984587
PE P-18:1/22:3	PE P	C45H83N1O7P1	+H+	780.59	40	5	0	QQQ+ SRM PE O-fragm	PE 40:0	% of total PE P	%	0	0.210649	0.258971	0.241666	0.233749	0.264077	0.25588	0.51119	0.542852	0.491131	0.612056	0.68786	0.66211	1.54476	1.6637	1.68698	1.50458	1.60597	1.51882	0.61931	0.768542	0.55523	2.05784	2.04378	1.8639	2.35206	2.34201	2.26513	1.14721	0.931563	0.937185	2.17162	2.10271	2.12304	2.17296	2.08259	1.94588
PE P-18:1/22:4	PE P	C45H81N1O7P1	+H+	778.575	40	6	0	QQQ+ SRM PE O-fragm	PE 40:0	% of total PE P	%	0	0.750168	0.574858	0.693925	0.656418	0.470819	0.557748	0.573099	0.548904	0.579273	0.590377	0.566026	0.588527	0.704604	0.775245	0.850742	0.723805	0.789171	0.679529	0.860095	0.860673	0.97468	0.628202	0.732456	0.669837	0.917016	0.96063	0.928772	2.08778	1.41614	1.39548	0.569915	0.57108	0.531346	0.686507	0.665239	0.674328
PE P-18:1/22:5	PE P	C45H79N1O7P1	+H+	776.559	40	7	0	QQQ+ SRM PE O-fragm	PE 40:0	% of total PE P	%	0	1.51402	1.46859	1.50892	1.55381	1.59888	1.65215	1.56414	1.68534	1.6198	1.38068	1.3908	1.24703	1.28636	1.25166	1.2551	1.26714	1.32787	1.20687	1.2327	1.19164	1.33469	1.09384	1.11717	1.21626	1.20012	1.25486	1.21304	2.048	1.46926	1.21798	1.16946	1.04805	1.15146	1.13302	0.988074	1.09559
PE P-18:1/22:6	PE P	C45H77N1O7P1	+H+	774.543	40	8	0	QQQ+ SRM PE O-fragm	PE 40:0	% of total PE P	%	0	5.70318	5.434	5.45873	5.21657	5.50647	5.62867	4.91044	5.13032	5.21986	4.91704	5.10071	5.31615	3.62487	3.70485	3.66171	4.22783	4.44033	4.17519	5.95308	6.15153	6.04088	3.47646	3.43371	3.46538	4.418	4.53563	4.43571	5.9438	6.32844	6.2928	3.20775	3.14477	3.21057	4.30889	4.53501	4.29547
PE P-18:0/16:0	PE P	C39H79N1O7P1	+H+	704.559	34	1	0	QQQ+ SRM PE O-fragm	PE 40:0	% of total PE P	%	0	0.608571	0.470521	0.53435	0.353089	0.339622	0.437744	0.254671	0.217877	0.333295	0.217793	0.22694	0.228873	0.405331	0.314475	0.324623	0.331809	0.309276	0.273992	0.261992	0.287234	0.228368	0.151752	0.253776	0.20542	0.227444	0.26423	0.197683	0.381512	0.326466	0.389639	0.344256	0.265062	0.314592	0.392504	0.335881	0.312389
PE P-18:0/16:1	PE P	C39H77N1O7P1	+H+	702.543	34	2	0	QQQ+ SRM PE O-fragm	PE 40:0	% of total PE P	%	0	0.322693	0.371528	0.285369	0.27359	0.245152	0.278161	0.337751	0.251679	0.253012	0.327936	0.312255	0.319683	0.660317	0.441249	0.634881	0.478984	0.447688	0.450562	0.22449	0.202258	0.195078	0.665989	0.564668	0.5409	0.349589	0.361794	0.453535	0.220416	0.351138	0.22683	0.450675	0.391066	0.440629	0.273462	0.232705	0.31301
PE P-18:0/18:0	PE P	C41H83N1O7P1	+H+	732.59	36	1	0	QQQ+ SRM PE O-fragm	PE 40:0	% of total PE P	%	0	0.0930578	0.198093	0.080745	0.103943	0.0455399	0.0215878	0	0	0.00719448	0.0652965	0.0613582	0.0413958	0.0394422	0.000784355	0.0498211	0.123937	0.0514062	0.0686255	0.0981232	0.111999	0.107578	0.0427623	0.0442282	0	0.0674089	0.0890156	0.0351535	0.0748972	0.0771146	0.177588	0.0317986	0.0301694	0.0165046	0.0420199	0.052977	0.0027941
PE P-18:0/18:1	PE P	C41H81N1O7P1	+H+	730.575	36	2	0	QQQ+ SRM PE O-fragm	PE 40:0	% of total PE P	%	0	2.26842	2.35114	2.46685	2.25128	2.18235	2.13016	2.48098	2.63307	2.4391	3.9769	3.9857	3.66834	3.44608	3.4649	3.21969	3.11326	3.19705	3.40226	4.58994	4.4406	4.3865	3.67543	3.65649	3.831	3.35996	3.79124	3.51434	4.98697	5.27553	5.29962	3.9436	4.07747	3.46711	3.21906	3.45509	3.32164
PE P-18:0/18:2	PE P	C41H79N1O7P1	+H+	728.559	36	3	0	QQQ+ SRM PE O-fragm	PE 40:0	% of total PE P	%	0	0.216728	0.162946	0.251876	0.292789	0.263815	0.248792	0.289203	0.188192	0.198174	0.30853	0.284923	0.222556	0.288515	0.296615	0.282756	0.165978	0.21542	0.240668	0.238758	0.252898	0.239342	0.391061	0.31156	0.305961	0.214079	0.283786	0.285449	0.208337	0.238791	0.255131	0.3356	0.510183	0.496412	0.233359	0.249915	0.189908
PE P-18:0/18:3	PE P	C41H77N1O7P1	+H+	726.543	36	4	0	QQQ+ SRM PE O-fragm	PE 40:0	% of total PE P	%	0	0.0711719	0.0517374	0.0361706	0.0211968	0.023067	0.0305797	0.0352679	0.0912637	0.0497728	0.0207592	0.0517179	0.0226909	0.0676819	0.0664757	0.14232	0.104654	0.0683177	0.080503	0.0516627	0.0322524	0.0488704	0.0735234	0.0751229	0.112037	0.0368689	0.0665842	0.0763926	0.0354251	0.0338431	0.0405664	0.116853	0.123527	0.130284	0.0739307	0.166734	0.0561615
PE P-18:0/20:3	PE P	C43H81N1O7P1	+H+	754.575	38	4	0	QQQ+ SRM PE O-fragm	PE 40:0	% of total PE P	%	0	0.818249	0.765433	0.686865	0.678496	0.676024	0.575927	0.761952	1.01921	0.944083	1.5764	1.32748	1.59738	2.35901	2.46224	2.44896	2.02381	2.08679	2.15281	1.28534	1.42584	1.1999	3.86634	3.58685	3.37632	2.64726	2.66746	2.59583	1.101	0.988744	1.01984	6.447	6.24256	6.55108	2.85304	2.62445	2.57464
PE P-18:0/20:4	PE P	C43H79N1O7P1	+H+	752.559	38	5	0	QQQ+ SRM PE O-fragm	PE 40:0	% of total PE P	%	0	10.2924	10.3675	10.5766	10.3048	10.7746	10.8678	9.1917	9.16229	9.36321	11.3616	11.861	11.8719	7.14207	7.27571	7.14639	8.63665	8.34825	8.02495	13.3231	13.3236	13.7995	7.59832	7.6477	7.21998	8.41221	8.35273	8.22051	11.0753	11.1722	11.5294	7.40861	7.36863	8.00859	12.3777	12.1546	12.7631
PE P-18:0/20:5	PE P	C43H77N1O7P1	+H+	750.543	38	6	0	QQQ+ SRM PE O-fragm	PE 40:0	% of total PE P	%	0	1.55913	1.31049	1.49396	1.5704	1.57167	1.40734	1.39746	1.44586	1.3868	0.889756	0.864018	0.887505	0.477375	0.56928	0.469917	0.749793	0.572013	0.675463	0.699343	0.629253	0.620915	0.44135	0.429667	0.463196	0.431139	0.357409	0.414404	0.584488	0.517345	0.452752	0.588565	0.561301	0.771376	1.26166	1.13116	1.41873
PE P-18:0/22:3	PE P	C45H85N1O7P1	+H+	782.606	40	4	0	QQQ+ SRM PE O-fragm	PE 40:0	% of total PE P	%	0	0.250415	0.385811	0.310151	0.259597	0.340223	0.247468	0.479375	0.522294	0.512368	0.859211	0.775478	0.684477	1.59316	1.68289	1.67155	1.67619	1.3886	1.45418	0.82301	0.800367	0.841031	2.62791	2.42383	2.58224	2.76473	2.69041	2.62455	0.975697	0.990692	0.922927	3.02136	2.93622	2.76645	2.94561	2.71394	2.61078
PE P-18:0/22:4	PE P	C45H83N1O7P1	+H+	780.59	40	5	0	QQQ+ SRM PE O-fragm	PE 40:0	% of total PE P	%	0	1.10854	1.23391	1.13871	1.06554	1.09567	1.10872	1.17039	1.12652	1.13027	1.02386	0.962255	1.02937	1.06269	0.973738	0.871376	1.0175	1.03309	1.02845	1.26932	1.02749	1.25356	1.16129	1.06251	1.06415	0.920357	1.09872	1.12685	1.64495	1.71658	1.67357	0.833833	0.741246	0.834526	0.994055	1.03647	1.07136
PE P-18:0/22:5	PE P	C45H81N1O7P1	+H+	778.575	40	6	0	QQQ+ SRM PE O-fragm	PE 40:0	% of total PE P	%	0	3.75833	4.11215	3.91978	3.865	3.99278	3.86282	3.17005	3.60464	3.55667	2.34103	2.18115	2.37881	2.11382	2.08694	2.47625	2.3373	2.54414	2.51146	2.04892	2.17036	1.95382	2.18533	2.20456	1.97011	2.08323	2.01822	1.84866	1.82639	1.97584	2.08749	1.85429	1.7538	1.78993	1.94592	1.85818	1.77272
PE P-18:0/22:6	PE P	C45H79N1O7P1	+H+	776.559	40	7	0	QQQ+ SRM PE O-fragm	PE 40:0	% of total PE P	%	0	10.3664	10.4454	9.76095	9.62632	8.94215	9.17272	8.7527	9.11668	8.62626	7.44095	7.35731	7.34047	4.8746	4.92282	4.85531	5.44107	5.54645	5.5737	8.49427	8.38256	8.1188	4.50658	4.8855	4.68683	5.03241	5.32213	4.70976	7.24156	7.54598	7.62018	3.88739	3.75682	4.02544	6.66638	6.47884	6.21041
Sum C32	PE P		+H+					QQQ+ SRM PE O-fragm	PE 40:0	% of total PE P	%	0	0.457457	0.548889	0.485879	0.50029	0.629254	0.478159	0.601603	0.460608	0.539176	0.445961	0.402738	0.500625	1.08947	1.08891	1.20319	0.711319	0.849958	0.943062	0.386472	0.354253	0.271052	0.746763	0.830077	0.80542	0.576802	0.541	0.577593	0.466435	0.52335	0.322989	0.97161	0.800026	0.87383	0.382538	0.444163	0.378175
Sum C34	PE P		+H+					QQQ+ SRM PE O-fragm	PE 40:0	% of total PE P	%	100	9.04487	9.37405	9.38316	8.95779	8.15137	8.98073	9.9375	9.42968	9.74471	12.5135	12.0119	12.2491	14.8418	14.4193	14.9438	13.1296	13.4248	13.1276	11.1943	11.3684	10.8552	12.8913	13.4536	13.6121	12.8478	13.0631	13.2355	11.4021	11.6503	11.2894	11.5496	11.9062	11.1905	9.67113	9.88704	10.0287
Sum C36	PE P		+H+					QQQ+ SRM PE O-fragm	PE 40:0	% of total PE P	%	0	21.887	21.5549	21.8539	22.7355	22.5496	22.0312	22.5029	22.6926	22.7209	27.1209	27.4253	27.5689	27.2184	27.2125	26.522	26.8574	26.6001	26.5568	26.2466	25.9875	25.7492	27.7413	27.3755	27.7421	26.2915	26.0657	27.1096	24.8352	26.2957	26.1386	29.3404	29.6207	29.2871	24.0388	25.0906	25.3878
Sum C38	PE P		+H+					QQQ+ SRM PE O-fragm	PE 40:0	% of total PE P	%	0	44.9489	44.6084	45.2442	45.3294	46.4587	46.0237	45.8267	45.1396	45.2596	40.7543	41.1385	40.4344	40.0454	40.2174	40.002	41.1062	40.4496	41.2244	40.8719	40.9367	42.0518	40.8832	40.4372	40.3216	40.596	40.1076	39.9248	40.3809	39.1562	40.1014	41.4227	41.6184	42.2159	45.0542	44.2198	44.5289
Sum C40	PE P		+H+					QQQ+ SRM PE O-fragm	PE 40:0	% of total PE P	%	0	23.6617	23.9137	23.0328	22.477	22.2111	22.4862	21.1314	22.2776	21.7356	19.1652	19.0216	19.2469	16.8049	17.0618	17.329	18.1954	18.6756	18.1482	21.3007	21.3532	21.0727	17.7375	17.9035	17.5187	19.6879	20.2226	19.1525	22.9154	22.3745	22.1476	16.7156	16.0547	16.4327	20.8533	20.3583	19.6765
Sum DB1	PE P		+H+					QQQ+ SRM PE O-fragm	PE 40:0	% of total PE P	%	10.9311	0.934204	1.04054	1.00906	0.755353	0.872749	0.772855	0.459863	0.441784	0.631496	0.544849	0.472375	0.523909	0.751255	0.647797	0.683632	0.636044	0.707743	0.613681	0.563392	0.687731	0.50959	0.345465	0.478144	0.341609	0.467204	0.595674	0.410068	0.778805	0.743468	0.787436	0.659908	0.584697	0.644674	0.702704	0.644968	0.477267
Sum DB2	PE P		+H+					QQQ+ SRM PE O-fragm	PE 40:0	% of total PE P	%	89.0689	10.3339	10.8614	10.6879	10.4048	9.5546	9.94009	11.6603	11.1868	11.3295	15.7833	15.0939	15.1331	17.1301	16.6929	17.1906	15.2175	15.5987	15.6495	15.162	15.0436	14.6429	15.7894	16.2483	16.4714	15.2714	15.6772	15.8303	15.5613	16.1326	15.6494	14.5557	14.932	13.66	11.9694	12.5671	12.5595
Sum DB3	PE P		+H+					QQQ+ SRM PE O-fragm	PE 40:0	% of total PE P	%	0	3.04235	3.17436	3.27421	3.30611	3.34295	3.2833	3.74011	3.86172	3.78105	5.93331	6.16042	5.78033	6.72747	6.75511	6.43143	5.84621	6.02779	5.86409	6.6997	6.65612	6.62952	6.90985	6.84056	7.15899	7.1933	7.31269	7.37657	8.46903	8.96288	8.48468	7.80746	8.07773	7.12985	5.55839	6.13018	6.18575
Sum DB4	PE P		+H+					QQQ+ SRM PE O-fragm	PE 40:0	% of total PE P	%	0	3.22823	3.07585	3.01167	2.91485	2.98265	2.92213	4.43034	4.89496	4.32177	6.24772	5.95521	6.36977	14.2862	14.7982	14.5327	11.8246	11.9772	12.2306	4.93326	4.95332	4.73325	18.8761	17.9139	18.6989	15.2929	14.9375	15.3205	5.0238	4.75565	4.78586	23.5153	23.1977	22.3441	13.1621	12.6792	12.6452
Sum DB5	PE P		+H+					QQQ+ SRM PE O-fragm	PE 40:0	% of total PE P	%	0	27.9762	27.9288	27.9249	28.4933	29.072	28.9626	26.947	26.5614	27.2057	30.3124	30.753	30.9079	26.4328	26.854	26.19	28.8064	28.1724	28.0322	30.9948	30.5602	30.8084	27.1071	26.9776	26.0582	27.5284	27.1766	27.8171	27.389	28.0183	28.3679	25.8557	26.1609	27.6219	30.7607	30.6564	30.9208
Sum DB6	PE P		+H+					QQQ+ SRM PE O-fragm	PE 40:0	% of total PE P	%	0	19.9533	19.3164	19.6538	20.5389	20.817	20.7127	19.2335	19.7983	20.1929	15.7785	16.2077	16.0657	14.5228	14.295	14.9566	15.7026	15.2884	15.8024	15.4041	15.5953	16.4432	12.9901	13.3299	12.8257	13.8317	13.9384	13.4959	17.039	15.6998	16.6968	12.8213	12.7273	13.5949	16.1394	16.0244	16.4823
Sum DB7	PE P		+H+					QQQ+ SRM PE O-fragm	PE 40:0	% of total PE P	%	0	28.8287	29.1687	28.9796	28.3701	27.8516	27.7776	28.6185	28.1247	27.3177	20.4828	20.2568	19.9031	16.5246	16.2521	16.3533	17.739	17.7874	17.6323	20.2898	20.3521	20.1923	14.5055	14.7779	14.9798	15.9971	15.8264	15.3139	19.7954	19.3588	18.9351	11.5769	11.1749	11.7941	17.3983	16.7627	16.4337
Sum DB8	PE P		+H+					QQQ+ SRM PE O-fragm	PE 40:0	% of total PE P	%	0	5.70318	5.434	5.45873	5.21657	5.50647	5.62867	4.91044	5.13032	5.21986	4.91704	5.10071	5.31615	3.62487	3.70485	3.66171	4.22783	4.44033	4.17519	5.95308	6.15153	6.04088	3.47646	3.43371	3.46538	4.418	4.53563	4.43571	5.9438	6.32844	6.2928	3.20775	3.14477	3.21057	4.30889	4.53501	4.29547
Sum Total	PE P		+H+					QQQ+ SRM PE O-fragm	PE 40:0	% of total PE P	%	100	100	100	100	100	100	100	100	100	100	100	100	100	100	100	100	100	100	100	100	100	100	100	100	100	100	100	100	100	100	100	100	100	100	100	100	100
LPC 16:0	LPC	C25H51NO9P	+HCOO-	540.331	16	0	0	FTMS- 400-650 mz	LPC 13:0	Concentration	nmol/mg protein	0	0.50928	0.499168	0.477417	0.372427	0.328937	0	0	0	0.39453	0	0	0	0.395584	0.463571	0	0	0	0.324012	0.573925	0.489192	0.404466	0	0	0	0	0.387358	0	0	0.469435	0.374866	0	0	0.32211	0	0	0
LPC 16:1	LPC	C25H49NO9P	+HCOO-	538.315	16	1	0	FTMS- 400-650 mz	LPC 13:0	Concentration	nmol/mg protein	0	0	0	0	0	0	0	0	0	0	0	0	0	0	0	0	0	0	0	0	0	0	0	0	0	0	0	0	0	0	0	0	0	0	0	0	0
LPC 18:0	LPC	C27H55NO9P	+HCOO-	568.362	18	0	0	FTMS- 400-650 mz	LPC 13:0	Concentration	nmol/mg protein	0	0.622077	0.538191	0.549001	0.358311	0.371004	0.294909	0	0.301414	0.467446	0	0.426216	0	0	0	0	0	0	0	0.882451	0.764681	0.671482	0	0	0	0	0	0	0.456249	0.658254	0.525022	0	0	0	0	0	0
LPC 18:1	LPC	C27H53NO9P	+HCOO-	566.346	18	1	0	FTMS- 400-650 mz	LPC 13:0	Concentration	nmol/mg protein	0	0.411439	0.377259	0.394912	0.338612	0	0	0	0	0	0	0.396338	0	1.0779	1.21238	0.819004	0.708751	0.750364	0.738727	0.435032	0.318634	0	0.659601	0.559492	0.502379	0.399746	0.893174	0.647724	0	0.461542	0	0.689554	0.538273	1.53142	0.370867	0	0
Sum C16	LPC		+HCOO-					FTMS- 400-650 mz	LPC 13:0	Concentration	nmol/mg protein		0.50928	0.499168	0.477417	0.372427	0.328937				0.39453				0.395584	0.463571				0.324012	0.573925	0.489192	0.404466					0.387358			0.469435	0.374866			0.32211
Sum C18	LPC		+HCOO-					FTMS- 400-650 mz	LPC 13:0	Concentration	nmol/mg protein		1.03352	0.915451	0.943913	0.696923	0.371004	0.294909		0.301414	0.467446		0.822554		1.0779	1.21238	0.819004	0.708751	0.750364	0.738727	1.31748	1.08331	0.671482	0.659601	0.559492	0.502379	0.399746	0.893174	0.647724	0.456249	1.1198	0.525022	0.689554	0.538273	1.53142	0.370867
Sum DB0	LPC		+HCOO-					FTMS- 400-650 mz	LPC 13:0	Concentration	nmol/mg protein		1.13136	1.03736	1.02642	0.730738	0.699941	0.294909		0.301414	0.861977		0.426216		0.395584	0.463571				0.324012	1.45638	1.25387	1.07595					0.387358		0.456249	1.12769	0.899888			0.32211
Sum DB1	LPC		+HCOO-					FTMS- 400-650 mz	LPC 13:0	Concentration	nmol/mg protein		0.411439	0.377259	0.394912	0.338612							0.396338		1.0779	1.21238	0.819004	0.708751	0.750364	0.738727	0.435032	0.318634		0.659601	0.559492	0.502379	0.399746	0.893174	0.647724		0.461542		0.689554	0.538273	1.53142	0.370867
Sum Total	LPC		+HCOO-					FTMS- 400-650 mz	LPC 13:0	Concentration	nmol/mg protein		1.5428	1.41462	1.42133	1.06935	0.699941	0.294909		0.301414	0.861977		0.822554		1.47348	1.67595	0.819004	0.708751	0.750364	1.06274	1.89141	1.57251	1.07595	0.659601	0.559492	0.502379	0.399746	1.28053	0.647724	0.456249	1.58923	0.899888	0.689554	0.538273	1.85353	0.370867
LPC 16:0	LPC	C25H51NO9P	+HCOO-	540.331	16	0	0	FTMS- 400-650 mz	LPC 13:0	% of total LPC	%		33.0102	35.2864	33.5895	34.8274	46.9949	0		0	45.7704		0		26.8469	27.6601	0	0	0	30.4884	30.3438	31.109	37.5916	0	0	0	0	30.2498	0	0	29.5385	41.6569	0	0	17.3782	0
LPC 16:1	LPC	C25H49NO9P	+HCOO-	538.315	16	1	0	FTMS- 400-650 mz	LPC 13:0	% of total LPC	%		0	0	0	0	0	0		0	0		0		0	0	0	0	0	0	0	0	0	0	0	0	0	0	0	0	0	0	0	0	0	0
LPC 18:0	LPC	C27H55NO9P	+HCOO-	568.362	18	0	0	FTMS- 400-650 mz	LPC 13:0	% of total LPC	%		40.3214	38.045	38.6259	33.5073	53.0051	100		100	54.2296		51.8161		0	0	0	0	0	0	46.6558	48.6282	62.4084	0	0	0	0	0	0	100	41.4197	58.3431	0	0	0	0
LPC 18:1	LPC	C27H53NO9P	+HCOO-	566.346	18	1	0	FTMS- 400-650 mz	LPC 13:0	% of total LPC	%		26.6684	26.6686	27.7847	31.6652	0	0		0	0		48.1839		73.1531	72.3399	100	100	100	69.5116	23.0004	20.2628	0	100	100	100	100	69.7502	100	0	29.0418	0	100	100	82.6218	100
Sum C16	LPC		+HCOO-					FTMS- 400-650 mz	LPC 13:0	% of total LPC	%		33.0102	35.2864	33.5895	34.8274	46.9949	0		0	45.7704		0		26.8469	27.6601	0	0	0	30.4884	30.3438	31.109	37.5916	0	0	0	0	30.2498	0	0	29.5385	41.6569	0	0	17.3782	0
Sum C18	LPC		+HCOO-					FTMS- 400-650 mz	LPC 13:0	% of total LPC	%		66.9898	64.7136	66.4105	65.1726	53.0051	100		100	54.2296		100		73.1531	72.3399	100	100	100	69.5116	69.6562	68.891	62.4084	100	100	100	100	69.7502	100	100	70.4615	58.3431	100	100	82.6218	100
Sum DB0	LPC		+HCOO-					FTMS- 400-650 mz	LPC 13:0	% of total LPC	%		73.3316	73.3314	72.2153	68.3348	100	100		100	100		51.8161		26.8469	27.6601	0	0	0	30.4884	76.9996	79.7372	100	0	0	0	0	30.2498	0	100	70.9582	100	0	0	17.3782	0
Sum DB1	LPC		+HCOO-					FTMS- 400-650 mz	LPC 13:0	% of total LPC	%		26.6684	26.6686	27.7847	31.6652	0	0		0	0		48.1839		73.1531	72.3399	100	100	100	69.5116	23.0004	20.2628	0	100	100	100	100	69.7502	100	0	29.0418	0	100	100	82.6218	100
Sum Total	LPC		+HCOO-					FTMS- 400-650 mz	LPC 13:0	% of total LPC	%		100	100	100	100	100	100		100	100		100		100	100	100	100	100	100	100	100	100	100	100	100	100	100	100	100	100	100	100	100	100	100
LPE 16:0	LPE	C21H43NO7P	-H+	452.278	16	0	0	FTMS- 400-650 mz	LPE 13:0	Concentration	nmol/mg protein	0	0	0	0	0	0	0	0	0	0	0	0	0	0	0	0	0	0	0	0	0	0	0	0	0	0	0	0	0	0	0	0	0	0	0	0	0
LPE 16:1	LPE	C21H41NO7P	-H+	450.263	16	1	0	FTMS- 400-650 mz	LPE 13:0	Concentration	nmol/mg protein	0	0	0	0	0	0	0	0	0	0	0	0	0	0	0	0	0	0	0	0	0	0	0	0	0	0	0	0	0	0	0	0	0	0	0	0	0
LPE 18:0	LPE	C23H47NO7P	-H+	480.31	18	0	0	FTMS- 400-650 mz	LPE 13:0	Concentration	nmol/mg protein	0	0	0	0	0	0	0	0	0	0	0	0	0	0.300313	0.356302	0.265649	0.28391	0.324417	0.3539	0	0	0	0	0	0	0	0.338413	0	0	0	0	0.314388	0.308942	0.290611	0	0	0
LPE 18:1	LPE	C23H45NO7P	-H+	478.294	18	1	0	FTMS- 400-650 mz	LPE 13:0	Concentration	nmol/mg protein	0	0	0	0	0	0	0	0	0	0	0	0.0536488	0	0.255117	0.299013	0.20145	0.141706	0.205574	0.233639	0.113109	0	0	0.217876	0.15611	0.136884	0	0.210702	0.113334	0	0.116605	0	0.216694	0.167562	0.228387	0.0881354	0	0
LPE 20:4	LPE	C25H43NO7P	-H+	500.278	20	4	0	FTMS- 400-650 mz	LPE 13:0	Concentration	nmol/mg protein	0	0	0	0	0	0	0	0	0	0	0	0.23501	0	0	0	0	0	0	0	0.361699	0.275744	0	0.336319	0.294066	0.271503	0	0	0	0	0.314289	0	0	0	0.283024	0.291421	0.211805	0
LPE 22:6	LPE	C27H43NO7P	-H+	524.278	22	6	0	FTMS- 400-650 mz	LPE 13:0	Concentration	nmol/mg protein	0	0	0	0	0	0	0	0	0	0	0	0.215363	0	0	0	0	0	0	0	0.312198	0.234404	0	0.29872	0.259041	0.253767	0	0	0	0	0.30561	0	0	0	0	0.23384	0	0
Sum C16	LPE		-H+					FTMS- 400-650 mz	LPE 13:0	Concentration	nmol/mg protein
Sum C18	LPE		-H+					FTMS- 400-650 mz	LPE 13:0	Concentration	nmol/mg protein												0.0536488		0.55543	0.655314	0.4671	0.425616	0.529991	0.587539	0.113109			0.217876	0.15611	0.136884		0.549116	0.113334		0.116605		0.531082	0.476504	0.518998	0.0881354
Sum C20	LPE		-H+					FTMS- 400-650 mz	LPE 13:0	Concentration	nmol/mg protein												0.23501								0.361699	0.275744		0.336319	0.294066	0.271503					0.314289				0.283024	0.291421	0.211805
Sum C22	LPE		-H+					FTMS- 400-650 mz	LPE 13:0	Concentration	nmol/mg protein												0.215363								0.312198	0.234404		0.29872	0.259041	0.253767					0.30561					0.23384
Sum DB0	LPE		-H+					FTMS- 400-650 mz	LPE 13:0	Concentration	nmol/mg protein														0.300313	0.356302	0.265649	0.28391	0.324417	0.3539								0.338413					0.314388	0.308942	0.290611
Sum DB1	LPE		-H+					FTMS- 400-650 mz	LPE 13:0	Concentration	nmol/mg protein												0.0536488		0.255117	0.299013	0.20145	0.141706	0.205574	0.233639	0.113109			0.217876	0.15611	0.136884		0.210702	0.113334		0.116605		0.216694	0.167562	0.228387	0.0881354
Sum DB4	LPE		-H+					FTMS- 400-650 mz	LPE 13:0	Concentration	nmol/mg protein												0.23501								0.361699	0.275744		0.336319	0.294066	0.271503					0.314289				0.283024	0.291421	0.211805
Sum DB6	LPE		-H+					FTMS- 400-650 mz	LPE 13:0	Concentration	nmol/mg protein												0.215363								0.312198	0.234404		0.29872	0.259041	0.253767					0.30561					0.23384
Sum Total	LPE		-H+					FTMS- 400-650 mz	LPE 13:0	Concentration	nmol/mg protein												0.504022		0.55543	0.655314	0.4671	0.425616	0.529991	0.587539	0.787006	0.510147		0.852915	0.709217	0.662153		0.549116	0.113334		0.736504		0.531082	0.476504	0.802022	0.613397	0.211805
LPE 16:0	LPE	C21H43NO7P	-H+	452.278	16	0	0	FTMS- 400-650 mz	LPE 13:0	% of total LPE	%												0		0	0	0	0	0	0	0	0		0	0	0		0	0		0		0	0	0	0	0
LPE 16:1	LPE	C21H41NO7P	-H+	450.263	16	1	0	FTMS- 400-650 mz	LPE 13:0	% of total LPE	%												0		0	0	0	0	0	0	0	0		0	0	0		0	0		0		0	0	0	0	0
LPE 18:0	LPE	C23H47NO7P	-H+	480.31	18	0	0	FTMS- 400-650 mz	LPE 13:0	% of total LPE	%												0		54.0685	54.3711	56.8721	66.7057	61.2117	60.2342	0	0		0	0	0		61.6288	0		0		59.1976	64.8351	36.2348	0	0
LPE 18:1	LPE	C23H45NO7P	-H+	478.294	18	1	0	FTMS- 400-650 mz	LPE 13:0	% of total LPE	%												10.6441		45.9315	45.6289	43.1279	33.2943	38.7883	39.7658	14.3721	0		25.5449	22.0116	20.6725		38.3712	100		15.8322		40.8024	35.1649	28.4764	14.3684	0
LPE 20:4	LPE	C25H43NO7P	-H+	500.278	20	4	0	FTMS- 400-650 mz	LPE 13:0	% of total LPE	%												46.627		0	0	0	0	0	0	45.9588	54.0518		39.4317	41.4635	41.003		0	0		42.673		0	0	35.2888	47.5094	100
LPE 22:6	LPE	C27H43NO7P	-H+	524.278	22	6	0	FTMS- 400-650 mz	LPE 13:0	% of total LPE	%												42.7289		0	0	0	0	0	0	39.6691	45.9482		35.0234	36.5249	38.3245		0	0		41.4947		0	0	0	38.1222	0
Sum C16	LPE		-H+					FTMS- 400-650 mz	LPE 13:0	% of total LPE	%												0		0	0	0	0	0	0	0	0		0	0	0		0	0		0		0	0	0	0	0
Sum C18	LPE		-H+					FTMS- 400-650 mz	LPE 13:0	% of total LPE	%												10.6441		100	100	100	100	100	100	14.3721	0		25.5449	22.0116	20.6725		100	100		15.8322		100	100	64.7112	14.3684	0
Sum C20	LPE		-H+					FTMS- 400-650 mz	LPE 13:0	% of total LPE	%												46.627		0	0	0	0	0	0	45.9588	54.0518		39.4317	41.4635	41.003		0	0		42.673		0	0	35.2888	47.5094	100
Sum C22	LPE		-H+					FTMS- 400-650 mz	LPE 13:0	% of total LPE	%												42.7289		0	0	0	0	0	0	39.6691	45.9482		35.0234	36.5249	38.3245		0	0		41.4947		0	0	0	38.1222	0
Sum DB0	LPE		-H+					FTMS- 400-650 mz	LPE 13:0	% of total LPE	%												0		54.0685	54.3711	56.8721	66.7057	61.2117	60.2342	0	0		0	0	0		61.6288	0		0		59.1976	64.8351	36.2348	0	0
Sum DB1	LPE		-H+					FTMS- 400-650 mz	LPE 13:0	% of total LPE	%												10.6441		45.9315	45.6289	43.1279	33.2943	38.7883	39.7658	14.3721	0		25.5449	22.0116	20.6725		38.3712	100		15.8322		40.8024	35.1649	28.4764	14.3684	0
Sum DB4	LPE		-H+					FTMS- 400-650 mz	LPE 13:0	% of total LPE	%												46.627		0	0	0	0	0	0	45.9588	54.0518		39.4317	41.4635	41.003		0	0		42.673		0	0	35.2888	47.5094	100
Sum DB6	LPE		-H+					FTMS- 400-650 mz	LPE 13:0	% of total LPE	%												42.7289		0	0	0	0	0	0	39.6691	45.9482		35.0234	36.5249	38.3245		0	0		41.4947		0	0	0	38.1222	0
Sum Total	LPE		-H+					FTMS- 400-650 mz	LPE 13:0	% of total LPE	%												100		100	100	100	100	100	100	100	100		100	100	100		100	100		100		100	100	100	100	100
Cer 32:1;2	Cer	C33H64NO5	+HCOO-	554.479	32	1	2	FTMS- 520-960 mz	Cer 35:1;2	Concentration	nmol/mg protein	0.0274379	0	0	0	0	0	0	0	0	0	0	0	0	0	0	0.0186224	0	0	0	0	0	0	0	0	0	0	0	0	0	0	0	0	0	0	0	0	0
Cer 34:1;2	Cer	C35H68NO5	+HCOO-	582.51	34	1	2	FTMS- 520-960 mz	Cer 35:1;2	Concentration	nmol/mg protein	0.0064797	0.212721	0.218787	0.172065	0.160338	0.168713	0.150709	0.105281	0.0991446	0.188536	0.189502	0.419377	0.244235	0.299735	0.325191	0.243152	0.187828	0.200752	0.204154	0.687884	0.460488	0.363161	1.38779	1.44072	1.18704	0.226245	0.39349	0.239776	0.609741	0.815404	0.560106	0.486407	0.482608	0.718336	0.842987	0.6874	0.692565
Cer 36:1;2	Cer	C37H72NO5	+HCOO-	610.542	36	1	2	FTMS- 520-960 mz	Cer 35:1;2	Concentration	nmol/mg protein	0.0120953	0	0.00769595	0	0	0	0.00433539	0	0	0	0	0	0	0	0.0051089	0	0	0	0	0.0317516	0.0111305	0.0023052	0.036828	0.0390851	0.0384275	0.00117517	0	0.00537484	0.030868	0.0449756	0.073696	0.00633583	0.00052194	0.00733992	0.015018	0.0157496	0.01598
Cer 40:1;2	Cer	C41H80NO5	+HCOO-	666.604	40	1	2	FTMS- 520-960 mz	Cer 35:1;2	Concentration	nmol/mg protein	0	0	0	0	0	0	0	0	0	0	0	0	0	0	0	0	0	0	0	0.105719	0	0	0.136575	0.134261	0.118297	0	0	0	0.103337	0.128908	0.086373	0	0	0.0936168	0.0810813	0	0
Cer 42:1;2	Cer	C43H84NO5	+HCOO-	694.635	42	1	2	FTMS- 520-960 mz	Cer 35:1;2	Concentration	nmol/mg protein	0	0.216467	0.200844	0.178884	0.156434	0.149067	0.122067	0.11032	0.102964	0.162901	0.131806	0.265769	0.160569	0.197566	0.212451	0.172012	0.111009	0.129845	0.131686	0.426348	0.307095	0.246043	0.38029	0.36722	0.312848	0.107814	0.193799	0.128208	0.374522	0.46099	0.329618	0.278881	0.273957	0.332492	0.277379	0.195805	0.198674
Cer 42:2;2	Cer	C43H82NO5	+HCOO-	692.62	42	2	2	FTMS- 520-960 mz	Cer 35:1;2	Concentration	nmol/mg protein	0	0.21187	0.188807	0.190121	0.139194	0.146538	0.109862	0.0997286	0.0880865	0.160244	0.142636	0.281947	0.172428	0.270485	0.30039	0.215376	0.165231	0.207163	0.185106	0.417374	0.310856	0.251824	0.766617	0.750169	0.667049	0.213308	0.340557	0.225606	0.409398	0.503635	0.358229	0.411701	0.357157	0.496057	0.519212	0.380809	0.383934
Sum C32	Cer		+HCOO-					FTMS- 520-960 mz	Cer 35:1;2	Concentration	nmol/mg protein	0.0274379															0.0186224
Sum C34	Cer		+HCOO-					FTMS- 520-960 mz	Cer 35:1;2	Concentration	nmol/mg protein	0.0064797	0.212721	0.218787	0.172065	0.160338	0.168713	0.150709	0.105281	0.0991446	0.188536	0.189502	0.419377	0.244235	0.299735	0.325191	0.243152	0.187828	0.200752	0.204154	0.687884	0.460488	0.363161	1.38779	1.44072	1.18704	0.226245	0.39349	0.239776	0.609741	0.815404	0.560106	0.486407	0.482608	0.718336	0.842987	0.6874	0.692565
Sum C36	Cer		+HCOO-					FTMS- 520-960 mz	Cer 35:1;2	Concentration	nmol/mg protein	0.0120953		0.00769595				0.00433539								0.0051089					0.0317516	0.0111305	0.0023052	0.036828	0.0390851	0.0384275	0.00117517		0.00537484	0.030868	0.0449756	0.073696	0.00633583	0.00052194	0.00733992	0.015018	0.0157496	0.01598
Sum C40	Cer		+HCOO-					FTMS- 520-960 mz	Cer 35:1;2	Concentration	nmol/mg protein																				0.105719			0.136575	0.134261	0.118297				0.103337	0.128908	0.086373			0.0936168	0.0810813
Sum C42	Cer		+HCOO-					FTMS- 520-960 mz	Cer 35:1;2	Concentration	nmol/mg protein		0.428337	0.38965	0.369005	0.295628	0.295605	0.231929	0.210048	0.19105	0.323145	0.274442	0.547716	0.332998	0.46805	0.512841	0.387388	0.27624	0.337008	0.316792	0.843722	0.617951	0.497868	1.14691	1.11739	0.979897	0.321122	0.534355	0.353814	0.78392	0.964625	0.687847	0.690582	0.631114	0.828549	0.796592	0.576613	0.582608
Sum DB1	Cer		+HCOO-					FTMS- 520-960 mz	Cer 35:1;2	Concentration	nmol/mg protein	0.0460129	0.429188	0.427327	0.350949	0.316773	0.31778	0.277111	0.2156	0.202108	0.351437	0.321308	0.685147	0.404804	0.4973	0.54275	0.433786	0.298837	0.330598	0.33584	1.2517	0.778713	0.61151	1.94149	1.98129	1.65661	0.335235	0.587289	0.373359	1.11847	1.45028	1.04979	0.771624	0.757087	1.15178	1.21647	0.898954	0.907218
Sum DB2	Cer		+HCOO-					FTMS- 520-960 mz	Cer 35:1;2	Concentration	nmol/mg protein		0.21187	0.188807	0.190121	0.139194	0.146538	0.109862	0.0997286	0.0880865	0.160244	0.142636	0.281947	0.172428	0.270485	0.30039	0.215376	0.165231	0.207163	0.185106	0.417374	0.310856	0.251824	0.766617	0.750169	0.667049	0.213308	0.340557	0.225606	0.409398	0.503635	0.358229	0.411701	0.357157	0.496057	0.519212	0.380809	0.383934
Sum Total	Cer		+HCOO-					FTMS- 520-960 mz	Cer 35:1;2	Concentration	nmol/mg protein	0.0460129	0.641058	0.616133	0.54107	0.455966	0.464318	0.386973	0.315329	0.290195	0.511681	0.463944	0.967093	0.577232	0.767785	0.84314	0.649163	0.464068	0.537761	0.520946	1.66908	1.08957	0.863334	2.7081	2.73146	2.32366	0.548543	0.927845	0.598965	1.52787	1.95391	1.40802	1.18332	1.11424	1.64784	1.73568	1.27976	1.29115
Cer 32:1;2	Cer	C33H64NO5	+HCOO-	554.479	32	1	2	FTMS- 520-960 mz	Cer 35:1;2	% of total Cer	%	59.6308	0	0	0	0	0	0	0	0	0	0	0	0	0	0	2.86867	0	0	0	0	0	0	0	0	0	0	0	0	0	0	0	0	0	0	0	0	0
Cer 34:1;2	Cer	C35H68NO5	+HCOO-	582.51	34	1	2	FTMS- 520-960 mz	Cer 35:1;2	% of total Cer	%	14.0824	33.1828	35.5097	31.8009	35.1645	36.3356	38.9455	33.3876	34.1648	36.8464	40.8459	43.3647	42.3113	39.0389	38.569	37.4562	40.4743	37.3312	39.1891	41.2134	42.2633	42.065	51.246	52.7456	51.0848	41.2448	42.409	40.0317	39.908	41.7319	39.7796	41.1051	43.3126	43.5925	48.5682	53.7131	53.6393
Cer 36:1;2	Cer	C37H72NO5	+HCOO-	610.542	36	1	2	FTMS- 520-960 mz	Cer 35:1;2	% of total Cer	%	26.2868	0	1.24907	0	0	0	1.12034	0	0	0	0	0	0	0	0.605938	0	0	0	0	1.90235	1.02155	0.267012	1.35992	1.43092	1.65375	0.214234	0	0.897356	2.02034	2.30182	5.23401	0.535426	0.0468425	0.445426	0.865254	1.23066	1.23765
Cer 40:1;2	Cer	C41H80NO5	+HCOO-	666.604	40	1	2	FTMS- 520-960 mz	Cer 35:1;2	% of total Cer	%	0	0	0	0	0	0	0	0	0	0	0	0	0	0	0	0	0	0	0	6.33398	0	0	5.04318	4.91535	5.09096	0	0	0	6.76349	6.59742	6.13435	0	0	5.68118	4.67145	0	0
Cer 42:1;2	Cer	C43H84NO5	+HCOO-	694.635	42	1	2	FTMS- 520-960 mz	Cer 35:1;2	% of total Cer	%	0	33.7671	32.5974	33.0611	34.3083	32.1045	31.5441	34.9856	35.4809	31.8364	28.4099	27.4812	27.8171	25.7319	25.1976	26.4975	23.9208	24.1455	25.2781	25.544	28.185	28.4992	14.0427	13.4441	13.4636	19.6546	20.887	21.405	24.5128	23.5932	23.41	23.5676	24.5868	20.1774	15.981	15.3001	15.3873
Cer 42:2;2	Cer	C43H82NO5	+HCOO-	692.62	42	2	2	FTMS- 520-960 mz	Cer 35:1;2	% of total Cer	%	0	33.0501	30.6438	35.138	30.5272	31.5598	28.39	31.6269	30.3542	31.3172	30.7441	29.154	29.8715	35.2292	35.6275	33.1776	35.6049	38.5233	35.5327	25.0063	28.5301	29.1688	28.3083	27.464	28.7068	38.8863	36.704	37.6659	26.7954	25.7757	25.442	34.7919	32.0538	30.1034	29.9141	29.7562	29.7358
Sum C32	Cer		+HCOO-					FTMS- 520-960 mz	Cer 35:1;2	% of total Cer	%	59.6308	0	0	0	0	0	0	0	0	0	0	0	0	0	0	2.86867	0	0	0	0	0	0	0	0	0	0	0	0	0	0	0	0	0	0	0	0	0
Sum C34	Cer		+HCOO-					FTMS- 520-960 mz	Cer 35:1;2	% of total Cer	%	14.0824	33.1828	35.5097	31.8009	35.1645	36.3356	38.9455	33.3876	34.1648	36.8464	40.8459	43.3647	42.3113	39.0389	38.569	37.4562	40.4743	37.3312	39.1891	41.2134	42.2633	42.065	51.246	52.7456	51.0848	41.2448	42.409	40.0317	39.908	41.7319	39.7796	41.1051	43.3126	43.5925	48.5682	53.7131	53.6393
Sum C36	Cer		+HCOO-					FTMS- 520-960 mz	Cer 35:1;2	% of total Cer	%	26.2868	0	1.24907	0	0	0	1.12034	0	0	0	0	0	0	0	0.605938	0	0	0	0	1.90235	1.02155	0.267012	1.35992	1.43092	1.65375	0.214234	0	0.897356	2.02034	2.30182	5.23401	0.535426	0.0468425	0.445426	0.865254	1.23066	1.23765
Sum C40	Cer		+HCOO-					FTMS- 520-960 mz	Cer 35:1;2	% of total Cer	%	0	0	0	0	0	0	0	0	0	0	0	0	0	0	0	0	0	0	0	6.33398	0	0	5.04318	4.91535	5.09096	0	0	0	6.76349	6.59742	6.13435	0	0	5.68118	4.67145	0	0
Sum C42	Cer		+HCOO-					FTMS- 520-960 mz	Cer 35:1;2	% of total Cer	%	0	66.8172	63.2412	68.1991	64.8355	63.6644	59.9341	66.6124	65.8352	63.1536	59.1541	56.6353	57.6887	60.9611	60.8251	59.6751	59.5257	62.6688	60.8109	50.5502	56.7152	57.668	42.3509	40.9081	42.1704	58.5409	57.591	59.071	51.3082	49.3689	48.852	58.3595	56.6406	50.2809	45.8951	45.0563	45.1231
Sum DB1	Cer		+HCOO-					FTMS- 520-960 mz	Cer 35:1;2	% of total Cer	%	100	66.9499	69.3562	64.862	69.4728	68.4402	71.61	68.3731	69.6458	68.6828	69.2559	70.846	70.1285	64.7708	64.3725	66.8224	64.3951	61.4767	64.4673	74.9937	71.4699	70.8312	71.6917	72.536	71.2932	61.1137	63.296	62.3341	73.2046	74.2243	74.558	65.2081	67.9462	69.8966	70.0859	70.2438	70.2642
Sum DB2	Cer		+HCOO-					FTMS- 520-960 mz	Cer 35:1;2	% of total Cer	%	0	33.0501	30.6438	35.138	30.5272	31.5598	28.39	31.6269	30.3542	31.3172	30.7441	29.154	29.8715	35.2292	35.6275	33.1776	35.6049	38.5233	35.5327	25.0063	28.5301	29.1688	28.3083	27.464	28.7068	38.8863	36.704	37.6659	26.7954	25.7757	25.442	34.7919	32.0538	30.1034	29.9141	29.7562	29.7358
Sum Total	Cer		+HCOO-					FTMS- 520-960 mz	Cer 35:1;2	% of total Cer	%	100	100	100	100	100	100	100	100	100	100	100	100	100	100	100	100	100	100	100	100	100	100	100	100	100	100	100	100	100	100	100	100	100	100	100	100	100
HexCer 30:2;2	HexCer	C37H68NO10	+HCOO-	686.485	30	2	2	FTMS- 520-960 mz	HexCer 35:1;2	Concentration	nmol/mg protein	0	0	0	0	0	0	0	0	0	0	0	0	0	0	0	0	0	0	0	0	0	0	0	0	0	0	0	0	0	0	0	0	0	0	0	0	0
HexCer 33:1;2	HexCer	C40H76NO10	+HCOO-	730.547	33	1	2	FTMS- 520-960 mz	HexCer 35:1;2	Concentration	nmol/mg protein	0	0.346329	0.419471	0.290083	0.43498	0.293383	0.292429	0.232669	0.343867	0.37956	0	0.270236	0.171911	0.538337	0.4588	0.348557	0.397556	0.326584	0.357984	0.300289	0	0.250851	0.244693	0.21684	0.205076	0.34604	0.485204	0	0.209084	0.361394	0.201115	0.590512	0.436101	0.436615	0.186647	0.145103	0.140388
HexCer 36:1;2	HexCer	C43H82NO10	+HCOO-	772.594	36	1	2	FTMS- 520-960 mz	HexCer 35:1;2	Concentration	nmol/mg protein	0	0	0	0	0	0	0	0	0	0	0	0	0	0	0.159851	0	0	0	0.134755	0.171496	0	0	0	0	0	0.171135	0.252258	0.196601	0	0	0	0.184212	0.25401	0.141637	0	0	0
HexCer 40:1;2	HexCer	C47H90NO10	+HCOO-	828.657	40	1	2	FTMS- 520-960 mz	HexCer 35:1;2	Concentration	nmol/mg protein	0	0	0	0	0	0	0	0	0	0	0	0	0	0	0	0	0	0	0	0	0	0	0	0	0	0	0	0	0	0	0	0	0	0	0	0	0
HexCer 42:1;2	HexCer	C49H94NO10	+HCOO-	856.688	42	1	2	FTMS- 520-960 mz	HexCer 35:1;2	Concentration	nmol/mg protein	0	0.209649	0.1899	0.207046	0.201106	0.167189	0	0.15193	0.148571	0.24893	0	0.163433	0	0	0.147934	0	0	0.138837	0.136429	0	0	0	0.203407	0.228245	0.175138	0	0.232371	0	0	0	0	0.176055	0.166573	0.189392	0.198219	0.142842	0.146887
HexCer 42:2;2	HexCer	C49H92NO10	+HCOO-	854.673	42	2	2	FTMS- 520-960 mz	HexCer 35:1;2	Concentration	nmol/mg protein	0	0	0	0	0	0	0	0	0	0	0	0.151353	0	0	0	0	0	0	0.125086	0.152727	0	0	0.332467	0.320566	0.256406	0.197961	0.315984	0.187394	0	0.170341	0	0.142083	0	0	0.207151	0.135664	0.144298
HexCer 44:1;2	HexCer	C51H98NO10	+HCOO-	884.72	44	1	2	FTMS- 520-960 mz	HexCer 35:1;2	Concentration	nmol/mg protein	0	0	0	0	0	0	0	0	0	0	0	0	0	0	0	0	0	0	0	0	0	0	0	0	0	0	0	0	0	0	0	0	0	0	0	0	0
HexCer 44:2;2	HexCer	C51H96NO10	+HCOO-	882.704	44	2	2	FTMS- 520-960 mz	HexCer 35:1;2	Concentration	nmol/mg protein	0	0	0	0	0	0	0	0	0	0	0	0	0	0	0	0	0	0	0	0	0	0	0	0	0	0	0	0	0	0	0	0	0	0	0	0	0
HexCer 46:1;2	HexCer	C53H102NO10	+HCOO-	912.751	46	1	2	FTMS- 520-960 mz	HexCer 35:1;2	Concentration	nmol/mg protein	0	0	0	0	0	0	0	0	0	0	0	0	0	0	0	0	0	0	0	0	0	0	0	0	0	0	0	0	0	0	0	0	0	0	0	0	0
HexCer 46:2;2	HexCer	C53H100NO10	+HCOO-	910.735	46	2	2	FTMS- 520-960 mz	HexCer 35:1;2	Concentration	nmol/mg protein	0	0	0	0	0	0	0	0	0	0	0	0	0	0	0	0	0	0	0	0	0	0	0	0	0	0	0	0	0	0	0	0	0	0	0	0	0
Sum C30	HexCer		+HCOO-					FTMS- 520-960 mz	HexCer 35:1;2	Concentration	nmol/mg protein
Sum C33	HexCer		+HCOO-					FTMS- 520-960 mz	HexCer 35:1;2	Concentration	nmol/mg protein		0.346329	0.419471	0.290083	0.43498	0.293383	0.292429	0.232669	0.343867	0.37956		0.270236	0.171911	0.538337	0.4588	0.348557	0.397556	0.326584	0.357984	0.300289		0.250851	0.244693	0.21684	0.205076	0.34604	0.485204		0.209084	0.361394	0.201115	0.590512	0.436101	0.436615	0.186647	0.145103	0.140388
Sum C36	HexCer		+HCOO-					FTMS- 520-960 mz	HexCer 35:1;2	Concentration	nmol/mg protein															0.159851				0.134755	0.171496						0.171135	0.252258	0.196601				0.184212	0.25401	0.141637
Sum C40	HexCer		+HCOO-					FTMS- 520-960 mz	HexCer 35:1;2	Concentration	nmol/mg protein
Sum C42	HexCer		+HCOO-					FTMS- 520-960 mz	HexCer 35:1;2	Concentration	nmol/mg protein		0.209649	0.1899	0.207046	0.201106	0.167189		0.15193	0.148571	0.24893		0.314786			0.147934			0.138837	0.261515	0.152727			0.535874	0.548812	0.431544	0.197961	0.548355	0.187394		0.170341		0.318138	0.166573	0.189392	0.40537	0.278506	0.291185
Sum C44	HexCer		+HCOO-					FTMS- 520-960 mz	HexCer 35:1;2	Concentration	nmol/mg protein
Sum C46	HexCer		+HCOO-					FTMS- 520-960 mz	HexCer 35:1;2	Concentration	nmol/mg protein
Sum DB1	HexCer		+HCOO-					FTMS- 520-960 mz	HexCer 35:1;2	Concentration	nmol/mg protein		0.555978	0.609371	0.497129	0.636086	0.460572	0.292429	0.384599	0.492439	0.62849		0.433669	0.171911	0.538337	0.766586	0.348557	0.397556	0.465422	0.629168	0.471785		0.250851	0.4481	0.445086	0.380214	0.517175	0.969833	0.196601	0.209084	0.361394	0.201115	0.950779	0.856683	0.767645	0.384866	0.287945	0.287275
Sum DB2	HexCer		+HCOO-					FTMS- 520-960 mz	HexCer 35:1;2	Concentration	nmol/mg protein												0.151353							0.125086	0.152727			0.332467	0.320566	0.256406	0.197961	0.315984	0.187394		0.170341		0.142083			0.207151	0.135664	0.144298
Sum Total	HexCer		+HCOO-					FTMS- 520-960 mz	HexCer 35:1;2	Concentration	nmol/mg protein		0.555978	0.609371	0.497129	0.636086	0.460572	0.292429	0.384599	0.492439	0.62849		0.585022	0.171911	0.538337	0.766586	0.348557	0.397556	0.465422	0.754254	0.624513		0.250851	0.780567	0.765652	0.63662	0.715136	1.28582	0.383994	0.209084	0.531735	0.201115	1.09286	0.856683	0.767645	0.592017	0.423608	0.431574
HexCer 30:2;2	HexCer	C37H68NO10	+HCOO-	686.485	30	2	2	FTMS- 520-960 mz	HexCer 35:1;2	% of total HexCer	%		0	0	0	0	0	0	0	0	0		0	0	0	0	0	0	0	0	0		0	0	0	0	0	0	0	0	0	0	0	0	0	0	0	0
HexCer 33:1;2	HexCer	C40H76NO10	+HCOO-	730.547	33	1	2	FTMS- 520-960 mz	HexCer 35:1;2	% of total HexCer	%		62.2919	68.8367	58.3517	68.3838	63.6997	100	60.4965	69.8295	60.3924		46.1924	100	100	59.8498	100	100	70.1695	47.462	48.0837		100	31.3481	28.321	32.2132	48.388	37.7351	0	100	67.965	100	54.0335	50.9057	56.8773	31.5273	34.254	32.5294
HexCer 36:1;2	HexCer	C43H82NO10	+HCOO-	772.594	36	1	2	FTMS- 520-960 mz	HexCer 35:1;2	% of total HexCer	%		0	0	0	0	0	0	0	0	0		0	0	0	20.8524	0	0	0	17.866	27.4608		0	0	0	0	23.9304	19.6185	51.1989	0	0	0	16.8559	29.6503	18.4509	0	0	0
HexCer 40:1;2	HexCer	C47H90NO10	+HCOO-	828.657	40	1	2	FTMS- 520-960 mz	HexCer 35:1;2	% of total HexCer	%		0	0	0	0	0	0	0	0	0		0	0	0	0	0	0	0	0	0		0	0	0	0	0	0	0	0	0	0	0	0	0	0	0	0
HexCer 42:1;2	HexCer	C49H94NO10	+HCOO-	856.688	42	1	2	FTMS- 520-960 mz	HexCer 35:1;2	% of total HexCer	%		37.7081	31.1633	41.6483	31.6162	36.3003	0	39.5035	30.1705	39.6076		27.9362	0	0	19.2978	0	0	29.8305	18.0879	0		0	26.0589	29.8106	27.5106	0	18.0718	0	0	0	0	16.1095	19.4439	24.6719	33.482	33.7202	34.0352
HexCer 42:2;2	HexCer	C49H92NO10	+HCOO-	854.673	42	2	2	FTMS- 520-960 mz	HexCer 35:1;2	% of total HexCer	%		0	0	0	0	0	0	0	0	0		25.8714	0	0	0	0	0	0	16.5841	24.4555		0	42.593	41.8684	40.2762	27.6816	24.5746	48.8011	0	32.035	0	13.001	0	0	34.9907	32.0258	33.4354
HexCer 44:1;2	HexCer	C51H98NO10	+HCOO-	884.72	44	1	2	FTMS- 520-960 mz	HexCer 35:1;2	% of total HexCer	%		0	0	0	0	0	0	0	0	0		0	0	0	0	0	0	0	0	0		0	0	0	0	0	0	0	0	0	0	0	0	0	0	0	0
HexCer 44:2;2	HexCer	C51H96NO10	+HCOO-	882.704	44	2	2	FTMS- 520-960 mz	HexCer 35:1;2	% of total HexCer	%		0	0	0	0	0	0	0	0	0		0	0	0	0	0	0	0	0	0		0	0	0	0	0	0	0	0	0	0	0	0	0	0	0	0
HexCer 46:1;2	HexCer	C53H102NO10	+HCOO-	912.751	46	1	2	FTMS- 520-960 mz	HexCer 35:1;2	% of total HexCer	%		0	0	0	0	0	0	0	0	0		0	0	0	0	0	0	0	0	0		0	0	0	0	0	0	0	0	0	0	0	0	0	0	0	0
HexCer 46:2;2	HexCer	C53H100NO10	+HCOO-	910.735	46	2	2	FTMS- 520-960 mz	HexCer 35:1;2	% of total HexCer	%		0	0	0	0	0	0	0	0	0		0	0	0	0	0	0	0	0	0		0	0	0	0	0	0	0	0	0	0	0	0	0	0	0	0
Sum C30	HexCer		+HCOO-					FTMS- 520-960 mz	HexCer 35:1;2	% of total HexCer	%		0	0	0	0	0	0	0	0	0		0	0	0	0	0	0	0	0	0		0	0	0	0	0	0	0	0	0	0	0	0	0	0	0	0
Sum C33	HexCer		+HCOO-					FTMS- 520-960 mz	HexCer 35:1;2	% of total HexCer	%		62.2919	68.8367	58.3517	68.3838	63.6997	100	60.4965	69.8295	60.3924		46.1924	100	100	59.8498	100	100	70.1695	47.462	48.0837		100	31.3481	28.321	32.2132	48.388	37.7351	0	100	67.965	100	54.0335	50.9057	56.8773	31.5273	34.254	32.5294
Sum C36	HexCer		+HCOO-					FTMS- 520-960 mz	HexCer 35:1;2	% of total HexCer	%		0	0	0	0	0	0	0	0	0		0	0	0	20.8524	0	0	0	17.866	27.4608		0	0	0	0	23.9304	19.6185	51.1989	0	0	0	16.8559	29.6503	18.4509	0	0	0
Sum C40	HexCer		+HCOO-					FTMS- 520-960 mz	HexCer 35:1;2	% of total HexCer	%		0	0	0	0	0	0	0	0	0		0	0	0	0	0	0	0	0	0		0	0	0	0	0	0	0	0	0	0	0	0	0	0	0	0
Sum C42	HexCer		+HCOO-					FTMS- 520-960 mz	HexCer 35:1;2	% of total HexCer	%		37.7081	31.1633	41.6483	31.6162	36.3003	0	39.5035	30.1705	39.6076		53.8076	0	0	19.2978	0	0	29.8305	34.6721	24.4555		0	68.6519	71.679	67.7868	27.6816	42.6464	48.8011	0	32.035	0	29.1105	19.4439	24.6719	68.4727	65.746	67.4706
Sum C44	HexCer		+HCOO-					FTMS- 520-960 mz	HexCer 35:1;2	% of total HexCer	%		0	0	0	0	0	0	0	0	0		0	0	0	0	0	0	0	0	0		0	0	0	0	0	0	0	0	0	0	0	0	0	0	0	0
Sum C46	HexCer		+HCOO-					FTMS- 520-960 mz	HexCer 35:1;2	% of total HexCer	%		0	0	0	0	0	0	0	0	0		0	0	0	0	0	0	0	0	0		0	0	0	0	0	0	0	0	0	0	0	0	0	0	0	0
Sum DB1	HexCer		+HCOO-					FTMS- 520-960 mz	HexCer 35:1;2	% of total HexCer	%		100	100	100	100	100	100	100	100	100		74.1286	100	100	100	100	100	100	83.4159	75.5445		100	57.407	58.1316	59.7238	72.3184	75.4254	51.1989	100	67.965	100	86.999	100	100	65.0093	67.9742	66.5646
Sum DB2	HexCer		+HCOO-					FTMS- 520-960 mz	HexCer 35:1;2	% of total HexCer	%		0	0	0	0	0	0	0	0	0		25.8714	0	0	0	0	0	0	16.5841	24.4555		0	42.593	41.8684	40.2762	27.6816	24.5746	48.8011	0	32.035	0	13.001	0	0	34.9907	32.0258	33.4354
Sum Total	HexCer		+HCOO-					FTMS- 520-960 mz	HexCer 35:1;2	% of total HexCer	%		100	100	100	100	100	100	100	100	100		100	100	100	100	100	100	100	100	100		100	100	100	100	100	100	100	100	100	100	100	100	100	100	100	100
PC 29:0	PC	C38H75NO10P	+HCOO-	736.513	29	0	0	FTMS- 520-960 mz	PC 28:0	Concentration	nmol/mg protein	0	0	0	0	0	0	0	0	0	0	0	0	0	0	0	0	0	0	0	0	0	0	0	0	0	0	0	0	0	0	0	0	0	0	0	0	0
PC 29:2	PC	C38H71NO10P	+HCOO-	732.482	29	2	0	FTMS- 520-960 mz	PC 28:0	Concentration	nmol/mg protein	0	0	0	0	0	0	0	0	0	0	0	0	0	0	0	0	0	0	0	0	0	0	0	0	0	0	0	0	0	0	0	0	0	0	0	0	0
PC 30:0	PC	C39H77NO10P	+HCOO-	750.529	30	0	0	FTMS- 520-960 mz	PC 28:0	Concentration	nmol/mg protein	0	1.05597	0.812349	0.861886	0.924262	0.821798	0.696385	0.711544	0.615918	1.06779	0.30268	0.598963	0.338069	2.23655	2.58443	1.94797	1.24595	1.46256	1.29833	0.712086	0.480523	0.36659	0.766208	0.633563	0.542679	1.30971	2.19528	1.40257	0.537319	0.777052	0.483307	1.20567	1.16666	0.859484	0.732632	0.539282	0.496801
PC 30:1	PC	C39H75NO10P	+HCOO-	748.513	30	1	0	FTMS- 520-960 mz	PC 28:0	Concentration	nmol/mg protein	0	0.323582	0.178295	0.292706	0.209051	0.24029	0.206644	0.259048	0.255497	0.337023	0.164565	0.279676	0.182657	0.579691	0.633739	0.507451	0.254928	0.364839	0.323443	0.262806	0.248171	0.214218	0.214236	0.191138	0.337103	0.319937	0.408235	0.299982	0.193653	0.234003	0.231333	0.422283	0.364489	0.289246	0.258015	0.153045	0
PC 31:0	PC	C40H79NO10P	+HCOO-	764.545	31	0	0	FTMS- 520-960 mz	PC 28:0	Concentration	nmol/mg protein	0	0.400806	0.3029	0.322812	0.331597	0.285797	0.28477	0.311783	0.224313	0.428129	0	0.244163	0	0.361037	0.387496	0.243417	0.227926	0.23431	0.227891	0.31487	0.16695	0	0	0	0	0.209454	0.366765	0.223226	0.210576	0.340867	0.214553	0.211811	0	0	0	0	0
PC 31:1	PC	C40H77NO10P	+HCOO-	762.529	31	1	0	FTMS- 520-960 mz	PC 28:0	Concentration	nmol/mg protein	0	0.246645	0	0.196979	0.214414	0.189041	0.165076	0.211631	0.170722	0.295669	0	0	0	0.299644	0.334023	0.251794	0	0.174442	0.17854	0	0	0	0	0	0	0	0.272712	0	0	0	0	0.314127	0.255496	0	0	0	0
PC 31:2	PC	C40H75NO10P	+HCOO-	760.513	31	2	0	FTMS- 520-960 mz	PC 28:0	Concentration	nmol/mg protein	0	0	0	0	0	0	0	0	0	0	0	0	0	0	0.0685989	0	0	0	0	0	0	0	0	0	0	0	0.0263284	0	0	0	0	0	0	0	0	0	0
PC 32:0	PC	C41H81NO10P	+HCOO-	778.56	32	0	0	FTMS- 520-960 mz	PC 28:0	Concentration	nmol/mg protein	0	2.59263	2.00312	2.21415	2.25176	2.16988	1.79335	1.78266	1.60125	2.68191	1.01892	1.98787	1.26458	3.0225	3.62544	2.57904	2.48191	2.96887	2.73517	2.74374	1.90715	1.51676	1.71703	1.36871	1.18509	2.94859	4.71083	3.21414	2.30435	3.26888	2.18169	1.5075	1.46354	1.26775	2.31743	1.58418	1.57186
PC 32:1	PC	C41H79NO10P	+HCOO-	776.545	32	1	0	FTMS- 520-960 mz	PC 28:0	Concentration	nmol/mg protein	0	4.72497	3.54666	4.15559	3.9379	3.76926	3.16618	3.38773	2.95473	4.88539	1.69333	3.26011	1.95738	7.90136	9.82365	6.86333	4.17587	5.0023	4.94347	3.52922	2.57008	2.04191	5.07908	4.2334	3.944	4.21499	7.07977	4.54713	2.98156	4.0823	2.73648	6.39973	5.91703	4.04852	3.13818	2.34745	1.98255
PC 32:2	PC	C41H77NO10P	+HCOO-	774.529	32	2	0	FTMS- 520-960 mz	PC 28:0	Concentration	nmol/mg protein	0	0.563451	0.464701	0.514294	0.580225	0.529126	0.476841	0.492217	0.455444	0.71872	0.226268	0.395928	0.274455	0.651607	0.773446	0.567823	0.409486	0.431693	0.41146	0.447707	0.338887	0.277095	0	0.354255	0.27038	0.249901	0.447202	0.178406	0.354177	0.48419	0.352953	0.372494	0.322815	0.188472	0.630327	0.480935	0.420539
PC 33:0	PC	C42H83NO10P	+HCOO-	792.576	33	0	0	FTMS- 520-960 mz	PC 28:0	Concentration	nmol/mg protein	0	0.377469	0.304887	0.346601	0.284464	0.289024	0.251293	0.269816	0.233538	0.371219	0.190986	0.372367	0.225255	0.368798	0.489174	0.313753	0.257902	0.32833	0.299294	0.412152	0.290921	0.223861	0.368555	0.246906	0.224611	0.313737	0.501485	0.303177	0.268417	0.393115	0.264139	0.321651	0.286919	0.222449	0.324115	0.206308	0.186081
PC 33:1	PC	C42H81NO10P	+HCOO-	790.56	33	1	0	FTMS- 520-960 mz	PC 28:0	Concentration	nmol/mg protein	0	1.83462	1.38311	1.53545	1.44333	1.36682	1.16487	1.16547	1.00886	1.78184	0.707012	1.42184	0.855001	1.5096	1.76456	1.29479	0.944076	1.18579	1.11703	1.52918	0.995049	0.797688	1.0846	0.848232	0.769386	0.965943	1.72012	0.984369	1.11168	1.62388	1.03718	1.53789	1.40165	0.966412	0.837677	0.620716	0.53132
PC 33:2	PC	C42H79NO10P	+HCOO-	788.545	33	2	0	FTMS- 520-960 mz	PC 28:0	Concentration	nmol/mg protein	0	2.3879	2.81615	2.82006	2.61609	2.60439	2.44961	2.15023	2.06954	3.52754	1.93455	3.7969	2.49842	3.97497	5.18616	3.87575	2.89405	2.88853	2.98739	4.5292	3.49703	2.84404	5.00617	4.27097	3.89438	3.14139	5.99808	3.53958	3.83941	5.10676	3.60536	3.91411	3.76645	3.25739	3.47361	2.84936	2.3685
PC 34:1	PC	C43H83NO10P	+HCOO-	804.576	34	1	0	FTMS- 520-960 mz	PC 28:0	Concentration	nmol/mg protein	0	16.9727	14.3879	15.491	14.0055	13.0584	11.1366	10.701	9.7453	15.523	7.77463	15.3972	9.31092	23.3963	27.4373	18.7557	14.8561	16.2832	15.5644	19.0211	13.6891	10.8717	21.8698	18.023	15.9963	17.1125	28.8962	18.2866	13.5705	20.1461	12.901	19.4149	17.5967	14.2222	14.2845	10.7817	9.61587
PC 34:2	PC	C43H81NO10P	+HCOO-	802.56	34	2	0	FTMS- 520-960 mz	PC 28:0	Concentration	nmol/mg protein	0	4.8079	3.67999	4.20295	3.97314	3.78997	3.21915	3.30353	2.93306	4.85765	1.82071	3.56667	2.12167	6.05871	7.19296	5.16098	3.54741	3.96715	3.96083	3.68559	2.57372	2.1007	4.57331	3.86711	3.5777	3.41877	5.79266	3.89281	2.86767	3.9091	2.53691	5.44953	4.93349	3.54407	2.95188	2.37369	1.92056
PC 34:3	PC	C43H79NO10P	+HCOO-	800.545	34	3	0	FTMS- 520-960 mz	PC 28:0	Concentration	nmol/mg protein	0	0.475161	0.376539	0.392245	0.408738	0.388253	0.336021	0.299864	0.311995	0.520847	0.154679	0.302315	0.178751	0.471691	0.569299	0.421014	0.30007	0.327901	0.322914	0.408447	0.279914	0.209302	0	0	0	0.274076	0.442494	0.28868	0.277669	0.418877	0.25358	0.535041	0.498155	0.360032	0.619576	0.521121	0.366321
PC 35:1	PC	C44H85NO10P	+HCOO-	818.592	35	1	0	FTMS- 520-960 mz	PC 28:0	Concentration	nmol/mg protein	0	1.51926	1.27831	1.30431	1.23435	1.10445	0.964056	0.883229	0.858445	1.38863	0.858144	1.69128	0.988642	1.55749	1.70637	1.24292	1.05392	1.22321	1.07948	1.92321	1.36513	1.11746	1.53788	1.19257	1.00984	1.13083	1.96509	1.2197	1.2768	1.81833	1.114	1.51742	1.44348	1.14803	1.0234	0.738076	0.672094
PC 35:2	PC	C44H83NO10P	+HCOO-	816.576	35	2	0	FTMS- 520-960 mz	PC 28:0	Concentration	nmol/mg protein	0	1.3357	1.07749	1.1988	1.1333	0.973642	0.881613	0.850219	0.786695	1.25278	0.566942	1.09479	0.675683	1.15356	1.33801	0.94738	0.786448	0.897045	0.840031	1.18163	0.882165	0.701687	0.931163	0.78983	0.753649	0.846243	1.37533	0.908909	0.819603	1.15608	0.79826	1.14188	1.05686	0.783364	0.718436	0.552151	0.453715
PC 35:3	PC	C44H81NO10P	+HCOO-	814.56	35	3	0	FTMS- 520-960 mz	PC 28:0	Concentration	nmol/mg protein	0	0	0.156493	0.184657	0.15727	0	0.152521	0	0.147078	0.236863	0	0.209187	0	0.403811	0.50723	0.377265	0.295149	0.286946	0.324416	0.283141	0.222819	0.189022	0.538746	0.454415	0.41337	0.359933	0.679053	0.4501	0.26047	0.297984	0.225043	0.575342	0.572022	0.451418	0.347888	0.290639	0.225596
PC 35:4	PC	C44H79NO10P	+HCOO-	812.545	35	4	0	FTMS- 520-960 mz	PC 28:0	Concentration	nmol/mg protein	0	1.13477	1.04471	1.08408	1.03882	0.943164	0.912597	0.863036	0.736838	1.27957	0.597776	1.06327	0.711015	1.48463	1.73542	1.27357	0.997875	1.16758	1.08706	1.27178	0.87527	0.738039	1.08588	0.965559	0.784996	1.00542	1.87229	1.02943	0.923009	1.27091	0.813995	1.36886	1.28217	1.08674	0.895803	0.753848	0.681446
PC 35:5	PC	C44H77NO10P	+HCOO-	810.529	35	5	0	FTMS- 520-960 mz	PC 28:0	Concentration	nmol/mg protein	0	0.811825	0.564914	0.636915	0.577128	0.555757	0.553236	0.446745	0.340239	0.786367	0.140301	0.444432	0.137308	1.11509	1.31807	0.872901	0.591164	0.691601	0.759419	0.592491	0.36182	0.237785	0.556633	0.377603	0.347558	0.57287	1.1856	0.633377	0.362882	0.623377	0.308836	0.888614	0.811144	0.594596	0.460989	0.303856	0.186938
PC 36:1	PC	C45H87NO10P	+HCOO-	832.607	36	1	0	FTMS- 520-960 mz	PC 28:0	Concentration	nmol/mg protein	0	6.27363	5.08075	5.40916	4.59037	4.29719	3.81709	3.64212	3.1027	5.4044	4.03963	8.16019	5.16729	7.50412	8.67918	6.42302	5.5611	6.66885	6.02953	10.3901	6.98083	5.49698	8.7392	7.16344	6.49847	6.35786	10.6687	6.73807	6.71837	9.61558	6.09748	9.01611	8.67975	6.57437	5.52868	4.60104	3.97963
PC 36:2	PC	C45H85NO10P	+HCOO-	830.592	36	2	0	FTMS- 520-960 mz	PC 28:0	Concentration	nmol/mg protein	0	10.0827	7.96821	9.02506	7.81258	7.39326	6.41139	6.24599	5.57609	9.30403	4.60114	9.30583	5.76043	11.7019	14.0297	10.1425	7.72645	8.96024	8.58317	10.6755	7.30096	5.8691	12.0393	9.4671	8.64754	8.91186	15.0183	9.71891	6.71903	9.49	6.04385	10.9271	10.4197	7.95197	7.1154	5.80372	4.71395
PC 36:3	PC	C45H83NO10P	+HCOO-	828.576	36	3	0	FTMS- 520-960 mz	PC 28:0	Concentration	nmol/mg protein	0	1.73424	1.405	1.44707	1.37647	1.2891	1.18074	1.05773	0.980243	1.68085	0.696242	1.37271	0.887911	2.52269	2.82602	2.04178	1.3799	1.62481	1.4663	1.41125	0.963927	0.738346	2.72881	2.10183	1.84233	1.60284	2.79226	1.69166	0.877691	1.22286	0.788568	2.86027	2.74066	2.00048	1.36834	1.16663	0.973422
PC 36:4	PC	C45H81NO10P	+HCOO-	826.56	36	4	0	FTMS- 520-960 mz	PC 28:0	Concentration	nmol/mg protein	0.00262332	1.11583	0.84825	0.884799	0.822913	0.778748	0.684272	0.588883	0.554667	0.954665	0.474101	1.09275	0.640878	0.984334	1.15395	0.838438	0.719678	0.831189	0.731805	1.73381	1.15083	0.92235	1.31291	1.15516	1.01302	1.02814	1.77859	1.04735	1.43787	2.12787	1.30473	0.985205	0.930393	0.725654	0.964567	0.68922	0.663582
PC 36:5	PC	C45H79NO10P	+HCOO-	824.545	36	5	0	FTMS- 520-960 mz	PC 28:0	Concentration	nmol/mg protein	0	0.255167	0.218782	0.213376	0.18901	0.207447	0.158953	0.153857	0.132483	0.217516	0	0.207166	0	0.126522	0.17665	0	0	0	0	0.261511	0.182309	0	0	0	0	0	0	0	0.207247	0.29852	0.197485	0	0	0	0.189319	0	0
PC 37:1	PC	C46H89NO10P	+HCOO-	846.623	37	1	0	FTMS- 520-960 mz	PC 28:0	Concentration	nmol/mg protein	0	0.118198	0.618554	0.638432	0.378716	0.650803	0.924623	0.467305	0.541409	1.23606	0.947546	1.50384	1.23599	0.83325	1.61989	1.26091	0.655745	0.65442	1.06078	1.45122	1.0768	0.895685	1.65684	0.837129	0.758376	0.666915	1.93645	1.01295	1.58116	1.65552	1.42601	0.895314	1.2398	0.771254	1.11905	1.197	0.955222
PC 37:2	PC	C46H87NO10P	+HCOO-	844.607	37	2	0	FTMS- 520-960 mz	PC 28:0	Concentration	nmol/mg protein	0	0.441269	0.385657	0.397502	0.352858	0.289009	0.26728	0.277759	0.270202	0.418101	0.265793	0.47904	0.306825	0.653396	0.729117	0.52289	0.451157	0.485078	0.448433	0.527352	0.414462	0.302586	0.613392	0.540084	0.438627	0.436645	0.815633	0.483995	0.371622	0.480812	0.321174	0.6759	0.635199	0.447598	0.347406	0.278494	0.235889
PC 37:3	PC	C46H85NO10P	+HCOO-	842.592	37	3	0	FTMS- 520-960 mz	PC 28:0	Concentration	nmol/mg protein	0	0.260584	0.233072	0.232281	0.219352	0.215139	0.187389	0.196153	0.176935	0.351407	0.169788	0.333153	0.222174	0.452428	0.57927	0.43124	0.327842	0.361589	0.369113	0.392761	0.262137	0.219131	0.594271	0.461055	0.449346	0.436218	0.699466	0.491402	0.285489	0.382946	0.24896	0.555794	0.57448	0.420306	0.342124	0.302497	0.236541
PC 37:4	PC	C46H83NO10P	+HCOO-	840.576	37	4	0	FTMS- 520-960 mz	PC 28:0	Concentration	nmol/mg protein	0	0.199035	0.177074	0.190755	0.166828	0.148298	0	0.175494	0.1439	0.223583	0.134186	0.343116	0.210862	0.287482	0.395109	0.301047	0.243908	0.302626	0.279513	0.520213	0.319503	0.251532	0.500149	0.448026	0.42552	0.430527	0.846478	0.492281	0.476727	0.619134	0.369645	0.656162	0.736253	0.518075	0.577861	0.502929	0.41317
PC 38:1	PC	C47H91NO10P	+HCOO-	860.639	38	1	0	FTMS- 520-960 mz	PC 28:0	Concentration	nmol/mg protein	0	0	0	0	0	0	0	0	0	0	0	0	0	0.185163	0.222673	0	0	0	0.148608	0.183979	0	0	0.204252	0.16991	0.185506	0.174229	0.305022	0.174253	0	0	0	0.215771	0.197106	0	0	0	0
PC 38:2	PC	C47H89NO10P	+HCOO-	858.623	38	2	0	FTMS- 520-960 mz	PC 28:0	Concentration	nmol/mg protein	0	0.531235	0.399555	0.469395	0.406028	0.350919	0.36997	0.351234	0.283395	0.483361	0.307922	0.597889	0.373357	1.04906	1.21831	0.907817	0.691673	0.845556	0.778587	0.688279	0.486381	0.352658	1.08005	0.79921	0.7545	0.821443	1.48848	0.918269	0.427982	0.621549	0.383371	1.15787	1.1656	0.731404	0.460669	0.441296	0.307349
PC 38:3	PC	C47H87NO10P	+HCOO-	856.607	38	3	0	FTMS- 520-960 mz	PC 28:0	Concentration	nmol/mg protein	0	1.26535	0.966308	1.0867	0.913725	0.855588	0.815332	0.851744	0.726724	1.2628	0.769119	1.54055	0.950825	1.96244	2.19653	1.69086	1.35387	1.56392	1.41489	1.57296	1.03579	0.870166	2.61694	2.18163	1.8368	1.91612	3.42645	2.01194	1.02098	1.39476	0.970436	2.73034	2.65683	1.90021	1.43294	1.27171	1.02085
PC 38:4	PC	C47H85NO10P	+HCOO-	854.592	38	4	0	FTMS- 520-960 mz	PC 28:0	Concentration	nmol/mg protein	0	2.13941	1.82326	1.86515	1.7121	1.58154	1.4437	1.30154	1.21293	2.00371	1.36581	2.70233	1.68834	1.76469	2.07316	1.3827	1.57003	1.75358	1.55313	3.75336	2.75881	2.24933	2.77125	2.35522	2.11492	2.23052	3.64278	2.32476	2.80073	4.23018	2.66626	2.17022	1.94427	1.5745	2.32826	1.72281	1.57435
PC 38:5	PC	C47H83NO10P	+HCOO-	852.576	38	5	0	FTMS- 520-960 mz	PC 28:0	Concentration	nmol/mg protein	0	1.65447	1.44884	1.45994	1.29397	1.22989	1.07857	0.92742	0.867141	1.50327	0.854773	1.7008	1.11196	0.886022	0.975918	0.719511	0.875464	1.01061	0.824803	2.52885	1.73566	1.37415	1.56238	1.35752	1.22548	1.22064	2.10426	1.23781	1.8627	2.65085	1.64922	0.968224	0.929556	0.714573	1.53736	1.17722	1.05398
PC 38:6	PC	C47H81NO10P	+HCOO-	850.56	38	6	0	FTMS- 520-960 mz	PC 28:0	Concentration	nmol/mg protein	0	0.651026	0.592853	0.56687	0.529698	0.521324	0.447561	0.382625	0.331268	0.53972	0.269116	0.563057	0.356566	0.473754	0.575287	0.39581	0.324982	0.387355	0.321093	0.875292	0.599241	0.456934	0.651297	0.531042	0.43436	0.418027	0.720996	0.408248	0.626515	0.922621	0.567389	0.427175	0.394195	0.376656	0.57368	0.42885	0.457582
PC 39:3	PC	C48H89NO10P	+HCOO-	870.623	39	3	0	FTMS- 520-960 mz	PC 28:0	Concentration	nmol/mg protein	0	0.0846936	0.0389066	0.0771744	0.0406396	0.0909193	0.123646	0.0906532	0	0.205369	0.0980674	0.18554	0.112249	0.244115	0.202676	0.256894	0.170577	0.162079	0.179415	0.319939	0.0962522	0.14117	0.259775	0.208131	0.209081	0.161428	0.370917	0.139777	0.322133	0.285057	0.136565	0.183943	0.306296	0.163102	0.191583	0.247157	0.140838
PC 39:4	PC	C48H87NO10P	+HCOO-	868.607	39	4	0	FTMS- 520-960 mz	PC 28:0	Concentration	nmol/mg protein	0	0.166828	0.122742	0.15232	0.120219	0.118618	0.147584	0.145633	0.116303	0.203907	0.123415	0.192987	0.201524	0.195068	0.296214	0.225541	0.161761	0.186462	0.223835	0.263733	0.225475	0.213552	0.253575	0.233391	0.225356	0.232959	0.362136	0.248773	0.25188	0.250456	0.250912	0.269086	0.260667	0.228057	0.253149	0.16618	0.200049
PC 40:3	PC	C49H91NO10P	+HCOO-	884.639	40	3	0	FTMS- 520-960 mz	PC 28:0	Concentration	nmol/mg protein	0	0	0	0	0	0	0	0	0	0	0	0.148889	0	0.190548	0.256005	0.165934	0.15853	0.154423	0.173793	0.22573	0.14421	0	0.419276	0.363958	0.310031	0.320855	0.52589	0.348814	0.183215	0.26322	0	0.443501	0.414807	0.29565	0.31423	0.233132	0.181055
PC 40:4	PC	C49H89NO10P	+HCOO-	882.623	40	4	0	FTMS- 520-960 mz	PC 28:0	Concentration	nmol/mg protein	0	0	0	0	0	0	0	0	0	0	0.142595	0.307922	0.182573	0.301018	0.34918	0.256856	0.216073	0.287567	0.250507	0.431129	0.320708	0.243506	0.592961	0.430969	0.399964	0.449639	0.74179	0.459534	0.380332	0.563605	0.325613	0.481226	0.413934	0.333112	0.39185	0.291677	0.253423
PC 40:5	PC	C49H87NO10P	+HCOO-	880.607	40	5	0	FTMS- 520-960 mz	PC 28:0	Concentration	nmol/mg protein	0	0.463592	0.354271	0.381362	0.337041	0.314578	0.259573	0.219591	0.187386	0.363249	0.275983	0.565719	0.357715	0.291776	0.34256	0.190212	0.26758	0.314638	0.269926	0.812031	0.549497	0.398866	0.480508	0.422317	0.380197	0.38976	0.65572	0.406449	0.561815	0.789456	0.489207	0.377809	0.295504	0.280283	0.441999	0.33677	0.296755
PC 40:6	PC	C49H85NO10P	+HCOO-	878.592	40	6	0	FTMS- 520-960 mz	PC 28:0	Concentration	nmol/mg protein	0	0.687243	0.596609	0.591195	0.570149	0.565822	0.479655	0.388495	0.343084	0.613847	0.341454	0.667967	0.411272	0.371189	0.421918	0.317859	0.352803	0.42687	0.361516	1.03248	0.702399	0.560237	0.620911	0.533065	0.47277	0.457397	0.735411	0.438025	0.685961	0.927802	0.653926	0.394282	0.345167	0.344636	0.588123	0.433779	0.390402
PC 40:7	PC	C49H83NO10P	+HCOO-	876.576	40	7	0	FTMS- 520-960 mz	PC 28:0	Concentration	nmol/mg protein	0	0.383823	0.277582	0.317527	0.326016	0.299081	0.256542	0.185006	0.150002	0.336561	0	0.289685	0.159489	0.256819	0.307752	0.242278	0.178444	0.183169	0.209706	0.442675	0.300205	0.237183	0.347208	0.270104	0.254977	0.217057	0.333077	0.240195	0.272812	0.43001	0.257666	0.216954	0.180637	0.158874	0.248853	0.21098	0.161013
Sum C29	PC		+HCOO-					FTMS- 520-960 mz	PC 28:0	Concentration	nmol/mg protein
Sum C30	PC		+HCOO-					FTMS- 520-960 mz	PC 28:0	Concentration	nmol/mg protein		1.37955	0.990644	1.15459	1.13331	1.06209	0.903029	0.970592	0.871414	1.40481	0.467245	0.878638	0.520726	2.81624	3.21817	2.45542	1.50088	1.8274	1.62178	0.974892	0.728694	0.580808	0.980444	0.824702	0.879782	1.62965	2.60351	1.70255	0.730972	1.01105	0.71464	1.62795	1.53115	1.14873	0.990647	0.692327	0.496801
Sum C31	PC		+HCOO-					FTMS- 520-960 mz	PC 28:0	Concentration	nmol/mg protein		0.647451	0.3029	0.519791	0.546011	0.474838	0.449846	0.523414	0.395035	0.723799		0.244163		0.66068	0.790118	0.495211	0.227926	0.408753	0.406431	0.31487	0.16695					0.209454	0.665806	0.223226	0.210576	0.340867	0.214553	0.525938	0.255496
Sum C32	PC		+HCOO-					FTMS- 520-960 mz	PC 28:0	Concentration	nmol/mg protein		7.88105	6.01448	6.88404	6.76989	6.46827	5.43637	5.66261	5.01143	8.28602	2.93851	5.64391	3.49642	11.5755	14.2225	10.0102	7.06727	8.40287	8.09009	6.72067	4.81611	3.83576	6.79611	5.95637	5.39946	7.41348	12.2378	7.93967	5.64009	7.83537	5.27112	8.27972	7.70339	5.50474	6.08593	4.41257	3.97494
Sum C33	PC		+HCOO-					FTMS- 520-960 mz	PC 28:0	Concentration	nmol/mg protein		4.59999	4.50414	4.70211	4.34388	4.26023	3.86577	3.58552	3.31194	5.6806	2.83255	5.59111	3.57867	5.85337	7.43989	5.4843	4.09603	4.40265	4.40371	6.47053	4.783	3.86559	6.45932	5.36611	4.88837	4.42107	8.21968	4.82712	5.2195	7.12375	4.90668	5.77365	5.45503	4.44625	4.6354	3.67638	3.0859
Sum C34	PC		+HCOO-					FTMS- 520-960 mz	PC 28:0	Concentration	nmol/mg protein		22.2557	18.4445	20.0862	18.3874	17.2366	14.6918	14.3044	12.9904	20.9015	9.75002	19.2662	11.6113	29.9267	35.1996	24.3377	18.7036	20.5783	19.8482	23.1151	16.5427	13.1817	26.4431	21.8901	19.574	20.8054	35.1313	22.4681	16.7159	24.4741	15.6915	25.3994	23.0284	18.1264	17.8559	13.6765	11.9027
Sum C35	PC		+HCOO-					FTMS- 520-960 mz	PC 28:0	Concentration	nmol/mg protein		4.80156	4.12192	4.40877	4.14087	3.57702	3.46402	3.04323	2.86929	4.94421	2.16316	4.50296	2.51265	5.71457	6.6051	4.71403	3.72456	4.26638	4.0904	5.25226	3.7072	2.984	4.6503	3.77997	3.30941	3.9153	7.07738	4.24152	3.64277	5.16669	3.26014	5.49212	5.16567	4.06414	3.44652	2.63857	2.21979
Sum C36	PC		+HCOO-					FTMS- 520-960 mz	PC 28:0	Concentration	nmol/mg protein	0.00262332	19.4615	15.521	16.9795	14.7913	13.9657	12.2524	11.6886	10.3462	17.5615	9.81111	20.1386	12.4565	22.8396	26.8655	19.4457	15.3871	18.0851	16.8108	24.4721	16.5789	13.0268	24.8203	19.8875	18.0014	17.9007	30.2579	19.196	15.9602	22.7548	14.4321	23.7887	22.7706	17.2525	15.1663	12.2606	10.3306
Sum C37	PC		+HCOO-					FTMS- 520-960 mz	PC 28:0	Concentration	nmol/mg protein		1.01909	1.41436	1.45897	1.11775	1.30325	1.37929	1.11671	1.13245	2.22915	1.51731	2.65915	1.97585	2.22656	3.32339	2.51609	1.67865	1.80371	2.15784	2.89155	2.07291	1.66893	3.36465	2.28629	2.07187	1.97031	4.29802	2.48062	2.715	3.13841	2.36579	2.78317	3.18573	2.15723	2.38644	2.28092	1.84082
Sum C38	PC		+HCOO-					FTMS- 520-960 mz	PC 28:0	Concentration	nmol/mg protein		6.24149	5.23082	5.44807	4.85551	4.53926	4.15513	3.81456	3.42145	5.79286	3.56675	7.10463	4.48106	6.32112	7.26188	5.0967	4.81602	5.56102	5.0411	9.60273	6.61588	5.30324	8.88616	7.39453	6.55157	6.78098	11.688	7.07527	6.73891	9.81996	6.23668	7.66959	7.28756	5.29735	6.33291	5.04189	4.41411
Sum C39	PC		+HCOO-					FTMS- 520-960 mz	PC 28:0	Concentration	nmol/mg protein		0.251521	0.161649	0.229494	0.160858	0.209538	0.27123	0.236286	0.116303	0.409275	0.221483	0.378527	0.313773	0.439183	0.49889	0.482435	0.332339	0.34854	0.40325	0.583672	0.321727	0.354722	0.513349	0.441522	0.434437	0.394387	0.733053	0.38855	0.574013	0.535512	0.387477	0.453029	0.566963	0.391159	0.444732	0.413337	0.340887
Sum C40	PC		+HCOO-					FTMS- 520-960 mz	PC 28:0	Concentration	nmol/mg protein		1.53466	1.22846	1.29008	1.23321	1.17948	0.99577	0.793092	0.680472	1.31366	0.760031	1.98018	1.11105	1.41135	1.67742	1.17314	1.17343	1.36667	1.26545	2.94404	2.01702	1.43979	2.46086	2.02041	1.81794	1.83471	2.99189	1.89302	2.08414	2.97409	1.72641	1.91377	1.65005	1.41255	1.98506	1.50634	1.28265
Sum DB0	PC		+HCOO-					FTMS- 520-960 mz	PC 28:0	Concentration	nmol/mg protein		4.42688	3.42326	3.74545	3.79208	3.5665	3.0258	3.07581	2.67502	4.54905	1.51258	3.20336	1.8279	5.98889	7.08654	5.08419	4.21369	4.99407	4.56069	4.18284	2.84554	2.10721	2.85179	2.24918	1.95238	4.78149	7.77436	5.14311	3.32066	4.77991	3.14369	3.24663	2.91713	2.34968	3.37417	2.32977	2.25474
Sum DB1	PC		+HCOO-					FTMS- 520-960 mz	PC 28:0	Concentration	nmol/mg protein		32.0136	26.4736	29.0236	26.0136	24.6763	21.5451	20.7175	18.6377	30.852	16.1849	31.7142	19.6979	43.7666	52.2214	36.5999	27.5017	31.5571	30.4453	38.2907	26.9251	21.4356	40.3859	32.6588	29.4989	30.9432	53.2523	33.263	27.4338	39.1757	25.5435	39.7335	37.0955	28.0201	26.1895	20.439	17.7367
Sum DB2	PC		+HCOO-					FTMS- 520-960 mz	PC 28:0	Concentration	nmol/mg protein		20.1501	16.7918	18.6281	16.8742	15.9303	14.0758	13.6712	12.3744	20.5622	9.72333	19.237	12.0108	25.2432	30.5363	22.1251	16.5067	18.4753	18.0099	21.7352	15.4936	12.4479	24.2434	20.0886	18.3368	17.8263	30.962	19.6409	15.3995	21.2485	14.0419	23.6389	22.3002	16.9043	15.6977	12.7796	10.4205
Sum DB3	PC		+HCOO-					FTMS- 520-960 mz	PC 28:0	Concentration	nmol/mg protein		3.82003	3.17631	3.42013	3.11619	2.839	2.79565	2.49614	2.34298	4.25814	1.8879	4.09235	2.35191	6.24772	7.13703	5.38498	3.98595	4.48167	4.25083	4.61423	3.00505	2.36714	7.15782	5.77101	5.06096	5.07147	8.93653	5.42237	3.22765	4.26571	2.62315	7.88423	7.76326	5.5912	4.61668	4.03289	3.14462
Sum DB4	PC		+HCOO-					FTMS- 520-960 mz	PC 28:0	Concentration	nmol/mg protein	0.00262332	4.75588	4.01604	4.17711	3.86087	3.57037	3.18815	3.07458	2.76463	4.66543	2.83789	5.70238	3.6352	5.01721	6.00304	4.27815	3.90933	4.52901	4.12584	7.97404	5.65059	4.61831	6.51672	5.58833	4.96378	5.3772	9.24406	5.60212	6.27055	9.06216	5.73116	5.93076	5.56769	4.46614	5.41149	4.12666	3.78602
Sum DB5	PC		+HCOO-					FTMS- 520-960 mz	PC 28:0	Concentration	nmol/mg protein		3.18505	2.58681	2.6916	2.39714	2.30767	2.05033	1.74761	1.52725	2.8704	1.27106	2.91812	1.60699	2.41941	2.8132	1.78262	1.73421	2.01685	1.85415	4.19488	2.82929	2.01081	2.59952	2.15744	1.95324	2.18327	3.94558	2.27763	2.99464	4.3622	2.64475	2.23465	2.0362	1.58945	2.62967	1.81785	1.53768
Sum DB6	PC		+HCOO-					FTMS- 520-960 mz	PC 28:0	Concentration	nmol/mg protein		1.33827	1.18946	1.15807	1.09985	1.08715	0.927216	0.771119	0.674352	1.15357	0.61057	1.23102	0.767839	0.844943	0.997205	0.71367	0.677785	0.814225	0.682609	1.90777	1.30164	1.01717	1.27221	1.06411	0.907129	0.875424	1.45641	0.846273	1.31248	1.85042	1.22131	0.821457	0.739362	0.721293	1.1618	0.862629	0.847984
Sum DB7	PC		+HCOO-					FTMS- 520-960 mz	PC 28:0	Concentration	nmol/mg protein		0.383823	0.277582	0.317527	0.326016	0.299081	0.256542	0.185006	0.150002	0.336561		0.289685	0.159489	0.256819	0.307752	0.242278	0.178444	0.183169	0.209706	0.442675	0.300205	0.237183	0.347208	0.270104	0.254977	0.217057	0.333077	0.240195	0.272812	0.43001	0.257666	0.216954	0.180637	0.158874	0.248853	0.21098	0.161013
Sum Total	PC		+HCOO-					FTMS- 520-960 mz	PC 28:0	Concentration	nmol/mg protein	0.00262332	70.0736	57.9348	63.1615	57.48	54.2763	47.8647	45.739	41.1463	69.2473	34.0282	68.3881	42.0581	89.7848	107.102	76.2109	58.7078	67.0514	64.139	83.3424	58.3511	46.2413	85.3746	69.8475	62.9282	67.2754	115.904	72.4356	60.232	85.1746	55.2071	83.7071	78.5999	59.801	59.3299	46.5995	39.8892
PC 29:0	PC	C38H75NO10P	+HCOO-	736.513	29	0	0	FTMS- 520-960 mz	PC 28:0	% of total PC	%	0	0	0	0	0	0	0	0	0	0	0	0	0	0	0	0	0	0	0	0	0	0	0	0	0	0	0	0	0	0	0	0	0	0	0	0	0
PC 29:2	PC	C38H71NO10P	+HCOO-	732.482	29	2	0	FTMS- 520-960 mz	PC 28:0	% of total PC	%	0	0	0	0	0	0	0	0	0	0	0	0	0	0	0	0	0	0	0	0	0	0	0	0	0	0	0	0	0	0	0	0	0	0	0	0	0
PC 30:0	PC	C39H77NO10P	+HCOO-	750.529	30	0	0	FTMS- 520-960 mz	PC 28:0	% of total PC	%	0	1.50694	1.40218	1.36457	1.60797	1.5141	1.4549	1.55566	1.4969	1.54199	0.889497	0.875828	0.803815	2.49101	2.41304	2.55603	2.1223	2.18125	2.02425	0.85441	0.823503	0.792777	0.897466	0.907066	0.862378	1.94679	1.89404	1.93629	0.892082	0.912304	0.875443	1.44034	1.48431	1.43724	1.23485	1.15727	1.24545
PC 30:1	PC	C39H75NO10P	+HCOO-	748.513	30	1	0	FTMS- 520-960 mz	PC 28:0	% of total PC	%	0	0.461775	0.307751	0.463425	0.363694	0.442717	0.431725	0.566362	0.620946	0.486694	0.483614	0.408954	0.434298	0.645644	0.591713	0.66585	0.434232	0.544119	0.504284	0.315333	0.425306	0.46326	0.250936	0.273651	0.535696	0.475564	0.352217	0.414136	0.321511	0.274733	0.419027	0.504477	0.463727	0.48368	0.434882	0.328426	0
PC 31:0	PC	C40H79NO10P	+HCOO-	764.545	31	0	0	FTMS- 520-960 mz	PC 28:0	% of total PC	%	0	0.571978	0.522829	0.511089	0.576892	0.526559	0.594948	0.681657	0.545159	0.618261	0	0.357026	0	0.402113	0.361799	0.319399	0.388238	0.349449	0.355308	0.377802	0.286113	0	0	0	0	0.311339	0.316438	0.308171	0.349608	0.400197	0.388632	0.253038	0	0	0	0	0
PC 31:1	PC	C40H77NO10P	+HCOO-	762.529	31	1	0	FTMS- 520-960 mz	PC 28:0	% of total PC	%	0	0.35198	0	0.311865	0.373024	0.348293	0.34488	0.462693	0.414913	0.426976	0	0	0	0.333735	0.311872	0.330391	0	0.260162	0.278364	0	0	0	0	0	0	0	0.23529	0	0	0	0	0.37527	0.325058	0	0	0	0
PC 31:2	PC	C40H75NO10P	+HCOO-	760.513	31	2	0	FTMS- 520-960 mz	PC 28:0	% of total PC	%	0	0	0	0	0	0	0	0	0	0	0	0	0	0	0.0640498	0	0	0	0	0	0	0	0	0	0	0	0.0227156	0	0	0	0	0	0	0	0	0	0
PC 32:0	PC	C41H81NO10P	+HCOO-	778.56	32	0	0	FTMS- 520-960 mz	PC 28:0	% of total PC	%	0	3.69987	3.45754	3.50553	3.91747	3.99784	3.74671	3.89747	3.8916	3.87295	2.99433	2.90675	3.00675	3.36639	3.38502	3.38409	4.22757	4.42775	4.26444	3.29213	3.2684	3.2801	2.01117	1.95957	1.88324	4.38287	4.06441	4.43723	3.82578	3.83785	3.95184	1.80092	1.86201	2.11994	3.906	3.39957	3.94056
PC 32:1	PC	C41H79NO10P	+HCOO-	776.545	32	1	0	FTMS- 520-960 mz	PC 28:0	% of total PC	%	0	6.74286	6.12181	6.57931	6.85091	6.94458	6.61486	7.40666	7.18104	7.05499	4.97625	4.76707	4.654	8.80032	9.1722	9.00571	7.11297	7.4604	7.70742	4.2346	4.40451	4.41576	5.94917	6.06092	6.26746	6.26527	6.10829	6.27747	4.95013	4.79286	4.95674	7.64539	7.52803	6.77	5.28937	5.03751	4.97013
PC 32:2	PC	C41H77NO10P	+HCOO-	774.529	32	2	0	FTMS- 520-960 mz	PC 28:0	% of total PC	%	0	0.804084	0.802111	0.814252	1.00944	0.974874	0.996227	1.07614	1.10689	1.0379	0.664943	0.578942	0.652562	0.725743	0.722155	0.745067	0.697498	0.643825	0.641512	0.53719	0.580773	0.599238	0	0.507184	0.429664	0.371459	0.385837	0.246297	0.588021	0.568467	0.639325	0.444997	0.410706	0.315166	1.06241	1.03206	1.05427
PC 33:0	PC	C42H83NO10P	+HCOO-	792.576	33	0	0	FTMS- 520-960 mz	PC 28:0	% of total PC	%	0	0.538675	0.526258	0.548754	0.494892	0.532504	0.525008	0.589903	0.567578	0.536076	0.561259	0.544491	0.535582	0.410758	0.456734	0.41169	0.439298	0.489669	0.466632	0.494528	0.49857	0.484114	0.431691	0.353493	0.356933	0.466348	0.432671	0.418546	0.445638	0.46154	0.47845	0.384258	0.365038	0.371983	0.546293	0.442726	0.466494
PC 33:1	PC	C42H81NO10P	+HCOO-	790.56	33	1	0	FTMS- 520-960 mz	PC 28:0	% of total PC	%	0	2.61813	2.38735	2.43099	2.51101	2.51826	2.43367	2.54808	2.45189	2.57315	2.07772	2.07907	2.03291	1.68136	1.64754	1.69896	1.60809	1.76847	1.74158	1.83482	1.70528	1.72505	1.2704	1.21441	1.22264	1.4358	1.48409	1.35896	1.84566	1.90653	1.8787	1.83723	1.78327	1.61605	1.4119	1.33202	1.33199
PC 33:2	PC	C42H79NO10P	+HCOO-	788.545	33	2	0	FTMS- 520-960 mz	PC 28:0	% of total PC	%	0	3.40771	4.8609	4.46483	4.55131	4.79839	5.11778	4.7011	5.02972	5.09412	5.68515	5.55199	5.9404	4.42721	4.84224	5.08556	4.92958	4.30794	4.65768	5.43445	5.99308	6.15044	5.86377	6.11471	6.18861	4.66945	5.17502	4.88651	6.37436	5.99563	6.53061	4.67596	4.79193	5.44705	5.85474	6.11457	5.93769
PC 34:1	PC	C43H83NO10P	+HCOO-	804.576	34	1	0	FTMS- 520-960 mz	PC 28:0	% of total PC	%	0	24.2212	24.8347	24.5259	24.3658	24.0591	23.2669	23.3958	23.6845	22.4168	22.8476	22.5145	22.1382	26.0582	25.6178	24.6102	25.3052	24.2847	24.2667	22.8228	23.4599	23.5108	25.6163	25.8033	25.4199	25.4365	24.9311	25.2453	22.5304	23.6527	23.3684	23.1938	22.3877	23.7826	24.0764	23.137	24.1064
PC 34:2	PC	C43H81NO10P	+HCOO-	802.56	34	2	0	FTMS- 520-960 mz	PC 28:0	% of total PC	%	0	6.86121	6.35196	6.65429	6.91222	6.98274	6.72552	7.22258	7.12836	7.01493	5.35059	5.21533	5.04463	6.74803	6.71596	6.77197	6.04248	5.91658	6.17538	4.42223	4.41075	4.5429	5.35676	5.5365	5.68537	5.08175	4.99779	5.37417	4.76104	4.58952	4.59525	6.51024	6.27671	5.92645	4.97537	5.09382	4.81472
PC 34:3	PC	C43H79NO10P	+HCOO-	800.545	34	3	0	FTMS- 520-960 mz	PC 28:0	% of total PC	%	0	0.678088	0.649936	0.621019	0.711097	0.715327	0.702023	0.655598	0.758257	0.752155	0.45456	0.442058	0.42501	0.525358	0.531546	0.552433	0.511125	0.489029	0.503459	0.490083	0.479706	0.452629	0	0	0	0.407395	0.381775	0.398533	0.460998	0.491786	0.459325	0.639183	0.633786	0.60205	1.04429	1.1183	0.918346
PC 35:1	PC	C44H85NO10P	+HCOO-	818.592	35	1	0	FTMS- 520-960 mz	PC 28:0	% of total PC	%	0	2.16809	2.20647	2.06504	2.14745	2.03487	2.01413	1.93102	2.08632	2.00532	2.52186	2.47306	2.35066	1.73469	1.59321	1.63089	1.7952	1.82428	1.68303	2.3076	2.33951	2.41659	1.80133	1.70738	1.60474	1.6809	1.69544	1.68384	2.11981	2.13482	2.01786	1.81277	1.83649	1.91975	1.72494	1.58387	1.6849
PC 35:2	PC	C44H83NO10P	+HCOO-	816.576	35	2	0	FTMS- 520-960 mz	PC 28:0	% of total PC	%	0	1.90614	1.85984	1.89799	1.97165	1.79386	1.84189	1.85885	1.91194	1.80914	1.6661	1.60085	1.60655	1.2848	1.24928	1.2431	1.3396	1.33785	1.3097	1.41781	1.51182	1.51745	1.09068	1.13079	1.19763	1.25788	1.18661	1.25478	1.36074	1.35731	1.44594	1.36414	1.34461	1.30995	1.21092	1.18489	1.13744
PC 35:3	PC	C44H81NO10P	+HCOO-	814.56	35	3	0	FTMS- 520-960 mz	PC 28:0	% of total PC	%	0	0	0.270118	0.292357	0.273608	0	0.318651	0	0.357451	0.342053	0	0.305882	0	0.449754	0.473594	0.495027	0.502742	0.42795	0.505801	0.339732	0.381859	0.408772	0.631038	0.650581	0.656891	0.535015	0.585873	0.621379	0.432443	0.349851	0.407633	0.687328	0.727764	0.754868	0.586363	0.623695	0.565556
PC 35:4	PC	C44H79NO10P	+HCOO-	812.545	35	4	0	FTMS- 520-960 mz	PC 28:0	% of total PC	%	0	1.6194	1.80325	1.71636	1.80727	1.73771	1.90662	1.88687	1.79077	1.84782	1.75671	1.55476	1.69056	1.65354	1.62034	1.67111	1.69973	1.74133	1.69484	1.52597	1.50001	1.59606	1.2719	1.38238	1.24745	1.49448	1.61538	1.42117	1.53242	1.49212	1.47444	1.6353	1.63126	1.81726	1.50987	1.61772	1.70835
PC 35:5	PC	C44H77NO10P	+HCOO-	810.529	35	5	0	FTMS- 520-960 mz	PC 28:0	% of total PC	%	0	1.15853	0.975086	1.00839	1.00405	1.02394	1.15583	0.976728	0.826899	1.13559	0.412309	0.649867	0.326472	1.24196	1.23066	1.14537	1.00696	1.03145	1.18402	0.710912	0.620075	0.514227	0.651989	0.54061	0.552309	0.851529	1.02292	0.874399	0.602473	0.731881	0.559414	1.06158	1.03199	0.994291	0.776992	0.652059	0.468644
PC 36:1	PC	C45H87NO10P	+HCOO-	832.607	36	1	0	FTMS- 520-960 mz	PC 28:0	% of total PC	%	0	8.95291	8.76977	8.56401	7.98603	7.91725	7.97476	7.96284	7.54065	7.80448	11.8714	11.9322	12.2861	8.35789	8.10363	8.42796	9.47251	9.94589	9.40072	12.4667	11.9635	11.8876	10.2363	10.2558	10.3268	9.4505	9.20478	9.30215	11.1541	11.2893	11.0447	10.771	11.0429	10.9938	9.31854	9.8736	9.9767
PC 36:2	PC	C45H85NO10P	+HCOO-	830.592	36	2	0	FTMS- 520-960 mz	PC 28:0	% of total PC	%	0	14.3887	13.7537	14.2888	13.5918	13.6215	13.3948	13.6557	13.5518	13.4359	13.5216	13.6074	13.6964	13.0333	13.0993	13.3085	13.1608	13.3633	13.3821	12.8092	12.5121	12.6923	14.1018	13.5539	13.7419	13.2468	12.9575	13.4173	11.1552	11.1418	10.9476	13.054	13.2567	13.2974	11.9929	12.4545	11.8176
PC 36:3	PC	C45H83NO10P	+HCOO-	828.576	36	3	0	FTMS- 520-960 mz	PC 28:0	% of total PC	%	0	2.47489	2.42513	2.29106	2.39469	2.37507	2.46683	2.31253	2.38234	2.42731	2.04608	2.00724	2.11116	2.80971	2.63861	2.67911	2.35046	2.42323	2.28612	1.69331	1.65194	1.59672	3.19628	3.00916	2.92768	2.3825	2.40911	2.33539	1.45718	1.43571	1.42838	3.417	3.48685	3.34522	2.30632	2.50354	2.44031
PC 36:4	PC	C45H81NO10P	+HCOO-	826.56	36	4	0	FTMS- 520-960 mz	PC 28:0	% of total PC	%	100	1.59237	1.46414	1.40085	1.43165	1.43478	1.4296	1.28749	1.34804	1.37863	1.39326	1.59786	1.52379	1.09633	1.07742	1.10015	1.22586	1.23963	1.14097	2.08035	1.97225	1.99465	1.53782	1.65384	1.60981	1.52826	1.53453	1.4459	2.38722	2.49824	2.36334	1.17697	1.18371	1.21345	1.62577	1.47903	1.66356
PC 36:5	PC	C45H79NO10P	+HCOO-	824.545	36	5	0	FTMS- 520-960 mz	PC 28:0	% of total PC	%	0	0.364141	0.377634	0.337826	0.328827	0.382205	0.332089	0.33638	0.321979	0.314114	0	0.302928	0	0.140916	0.164936	0	0	0	0	0.313779	0.312434	0	0	0	0	0	0	0	0.344081	0.350479	0.357716	0	0	0	0.319095	0	0
PC 37:1	PC	C46H89NO10P	+HCOO-	846.623	37	1	0	FTMS- 520-960 mz	PC 28:0	% of total PC	%	0	0.168677	1.06767	1.01079	0.658867	1.19905	1.93174	1.02168	1.31581	1.78499	2.78459	2.19898	2.93877	0.928052	1.51247	1.6545	1.11696	0.975999	1.65388	1.74128	1.84539	1.93698	1.94067	1.19851	1.20514	0.991322	1.67073	1.39841	2.62511	1.94367	2.58302	1.06958	1.57735	1.2897	1.88614	2.5687	2.39469
PC 37:2	PC	C46H87NO10P	+HCOO-	844.607	37	2	0	FTMS- 520-960 mz	PC 28:0	% of total PC	%	0	0.629722	0.665673	0.629342	0.61388	0.532478	0.558407	0.60727	0.656686	0.60378	0.781098	0.700473	0.729529	0.727735	0.680766	0.686109	0.76848	0.723443	0.699158	0.632753	0.710291	0.654364	0.718471	0.773233	0.697029	0.649041	0.703712	0.668173	0.616984	0.564502	0.581763	0.807459	0.808141	0.748479	0.58555	0.597633	0.591359
PC 37:3	PC	C46H85NO10P	+HCOO-	842.592	37	3	0	FTMS- 520-960 mz	PC 28:0	% of total PC	%	0	0.371871	0.4023	0.367757	0.381615	0.396377	0.391498	0.428852	0.430015	0.507467	0.498962	0.487151	0.528254	0.503902	0.540856	0.56585	0.558429	0.539271	0.575488	0.471261	0.449241	0.473886	0.696074	0.660088	0.714063	0.648407	0.603485	0.678399	0.473983	0.449601	0.450957	0.663975	0.730891	0.702841	0.576647	0.649144	0.592996
PC 37:4	PC	C46H83NO10P	+HCOO-	840.576	37	4	0	FTMS- 520-960 mz	PC 28:0	% of total PC	%	0	0.284037	0.305643	0.302011	0.290236	0.273227	0	0.383686	0.349727	0.322876	0.394337	0.501718	0.50136	0.32019	0.368907	0.395018	0.415461	0.451335	0.435792	0.624188	0.547554	0.543955	0.585829	0.641435	0.676199	0.639947	0.730324	0.679612	0.791484	0.7269	0.669561	0.783879	0.936709	0.866332	0.97398	1.07926	1.03579
PC 38:1	PC	C47H91NO10P	+HCOO-	860.639	38	1	0	FTMS- 520-960 mz	PC 28:0	% of total PC	%	0	0	0	0	0	0	0	0	0	0	0	0	0	0.206229	0.207906	0	0	0	0.231697	0.22075	0	0	0.239242	0.243259	0.29479	0.258979	0.263167	0.240562	0	0	0	0.257769	0.250771	0	0	0	0
PC 38:2	PC	C47H89NO10P	+HCOO-	858.623	38	2	0	FTMS- 520-960 mz	PC 28:0	% of total PC	%	0	0.75811	0.689664	0.743166	0.706382	0.646542	0.77295	0.767909	0.688748	0.698021	0.904904	0.874259	0.887718	1.16841	1.13752	1.19119	1.17816	1.26106	1.21391	0.825845	0.833543	0.762646	1.26508	1.14422	1.19899	1.22102	1.28423	1.2677	0.710555	0.729735	0.694423	1.38324	1.48295	1.22306	0.776454	0.946998	0.770506
PC 38:3	PC	C47H87NO10P	+HCOO-	856.607	38	3	0	FTMS- 520-960 mz	PC 28:0	% of total PC	%	0	1.80574	1.66792	1.72052	1.58964	1.57636	1.70341	1.86218	1.76619	1.82361	2.26024	2.25266	2.26074	2.18571	2.05087	2.21866	2.30612	2.33243	2.20597	1.88735	1.7751	1.88179	3.06524	3.12341	2.91889	2.84818	2.95627	2.77756	1.69508	1.63753	1.75781	3.26178	3.3802	3.17756	2.41521	2.72903	2.5592
PC 38:4	PC	C47H85NO10P	+HCOO-	854.592	38	4	0	FTMS- 520-960 mz	PC 28:0	% of total PC	%	0	3.05309	3.14709	2.95299	2.9786	2.91386	3.0162	2.84557	2.94783	2.89355	4.01378	3.95146	4.01432	1.96546	1.93568	1.8143	2.67431	2.61527	2.4215	4.50355	4.72795	4.86433	3.24598	3.37195	3.36085	3.3155	3.14292	3.20941	4.64991	4.96648	4.82956	2.59263	2.47363	2.63291	3.92426	3.69705	3.9468
PC 38:5	PC	C47H83NO10P	+HCOO-	852.576	38	5	0	FTMS- 520-960 mz	PC 28:0	% of total PC	%	0	2.36105	2.50082	2.31144	2.25116	2.26598	2.25337	2.02764	2.10746	2.17087	2.51196	2.48699	2.64388	0.986828	0.911201	0.944104	1.49122	1.50721	1.28596	3.03429	2.97452	2.9717	1.83002	1.94354	1.94743	1.8144	1.81551	1.70884	3.09253	3.11225	2.98734	1.15668	1.18264	1.19492	2.59121	2.52626	2.64228
PC 38:6	PC	C47H81NO10P	+HCOO-	850.56	38	6	0	FTMS- 520-960 mz	PC 28:0	% of total PC	%	0	0.929061	1.02331	0.897493	0.921535	0.960499	0.935055	0.83654	0.805096	0.779409	0.790862	0.823325	0.847796	0.527655	0.537137	0.519362	0.553559	0.577699	0.500621	1.05024	1.02696	0.988152	0.762869	0.760287	0.690247	0.621367	0.622061	0.563601	1.04017	1.08321	1.02775	0.510321	0.501521	0.62985	0.966933	0.92029	1.14713
PC 39:3	PC	C48H89NO10P	+HCOO-	870.623	39	3	0	FTMS- 520-960 mz	PC 28:0	% of total PC	%	0	0.120864	0.0671558	0.122186	0.0707022	0.167512	0.258324	0.198197	0	0.296573	0.288195	0.271304	0.266891	0.271889	0.189236	0.337083	0.290553	0.241724	0.279728	0.383885	0.164954	0.305291	0.304276	0.29798	0.332253	0.239951	0.32002	0.192968	0.53482	0.334673	0.247368	0.219746	0.389689	0.272741	0.322912	0.530386	0.353073
PC 39:4	PC	C48H87NO10P	+HCOO-	868.607	39	4	0	FTMS- 520-960 mz	PC 28:0	% of total PC	%	0	0.238075	0.211863	0.241159	0.209148	0.218545	0.308335	0.3184	0.282658	0.294462	0.362686	0.282193	0.479157	0.217262	0.276571	0.295943	0.275536	0.278088	0.348984	0.316445	0.386411	0.461821	0.297014	0.334143	0.358117	0.346277	0.312444	0.34344	0.418183	0.29405	0.454491	0.321461	0.331638	0.381359	0.42668	0.356614	0.50151
PC 40:3	PC	C49H91NO10P	+HCOO-	884.639	40	3	0	FTMS- 520-960 mz	PC 28:0	% of total PC	%	0	0	0	0	0	0	0	0	0	0	0	0.217712	0	0.212227	0.239028	0.21773	0.270033	0.230306	0.270962	0.270846	0.247143	0	0.491101	0.521075	0.492675	0.476927	0.453727	0.48155	0.304182	0.309035	0	0.529825	0.527745	0.494389	0.529633	0.50029	0.453893
PC 40:4	PC	C49H89NO10P	+HCOO-	882.623	40	4	0	FTMS- 520-960 mz	PC 28:0	% of total PC	%	0	0	0	0	0	0	0	0	0	0	0.419048	0.450256	0.434098	0.335266	0.326025	0.337033	0.368049	0.428876	0.390569	0.517298	0.549618	0.526598	0.69454	0.617015	0.635588	0.668356	0.640001	0.634404	0.631445	0.661706	0.589802	0.574893	0.526633	0.557034	0.66046	0.625923	0.635317
PC 40:5	PC	C49H87NO10P	+HCOO-	880.607	40	5	0	FTMS- 520-960 mz	PC 28:0	% of total PC	%	0	0.661578	0.611499	0.603788	0.586362	0.579586	0.542307	0.480097	0.455413	0.524567	0.811041	0.827218	0.850527	0.324972	0.319844	0.249586	0.455782	0.469249	0.420845	0.974331	0.941709	0.862574	0.562824	0.604627	0.604177	0.579351	0.565743	0.561118	0.932751	0.926867	0.886131	0.451346	0.37596	0.468692	0.744985	0.722691	0.743947
PC 40:6	PC	C49H85NO10P	+HCOO-	878.592	40	6	0	FTMS- 520-960 mz	PC 28:0	% of total PC	%	0	0.980745	1.02979	0.936005	0.991909	1.04248	1.00211	0.849373	0.833815	0.886456	1.00344	0.976729	0.977868	0.413421	0.393939	0.417078	0.600947	0.636631	0.563644	1.23884	1.20375	1.21155	0.727279	0.763184	0.751285	0.679888	0.634498	0.604709	1.13886	1.08929	1.1845	0.471026	0.439144	0.576305	0.991277	0.930866	0.978716
PC 40:7	PC	C49H83NO10P	+HCOO-	876.576	40	7	0	FTMS- 520-960 mz	PC 28:0	% of total PC	%	0	0.547742	0.479129	0.502722	0.567182	0.551033	0.535973	0.404482	0.364558	0.486028	0	0.423589	0.379212	0.286038	0.287344	0.317905	0.303952	0.273178	0.326955	0.531152	0.514481	0.512925	0.406687	0.386705	0.405188	0.32264	0.287372	0.331598	0.452935	0.504857	0.466727	0.259183	0.229819	0.265671	0.41944	0.452751	0.403651
Sum C29	PC		+HCOO-					FTMS- 520-960 mz	PC 28:0	% of total PC	%	0	0	0	0	0	0	0	0	0	0	0	0	0	0	0	0	0	0	0	0	0	0	0	0	0	0	0	0	0	0	0	0	0	0	0	0	0
Sum C30	PC		+HCOO-					FTMS- 520-960 mz	PC 28:0	% of total PC	%	0	1.96871	1.70993	1.828	1.97167	1.95682	1.88663	2.12202	2.11784	2.02868	1.37311	1.28478	1.23811	3.13666	3.00476	3.22188	2.55653	2.72537	2.52853	1.16974	1.24881	1.25604	1.1484	1.18072	1.39807	2.42235	2.24626	2.35043	1.21359	1.18704	1.29447	1.94482	1.94803	1.92092	1.66973	1.4857	1.24545
Sum C31	PC		+HCOO-					FTMS- 520-960 mz	PC 28:0	% of total PC	%	0	0.923959	0.522829	0.822954	0.949915	0.874852	0.939828	1.14435	0.960073	1.04524	0	0.357026	0	0.735848	0.737721	0.64979	0.388238	0.609611	0.633672	0.377802	0.286113	0	0	0	0	0.311339	0.574444	0.308171	0.349608	0.400197	0.388632	0.628308	0.325058	0	0	0	0
Sum C32	PC		+HCOO-					FTMS- 520-960 mz	PC 28:0	% of total PC	%	0	11.2468	10.3815	10.8991	11.7778	11.9173	11.3578	12.3803	12.1795	11.9658	8.63552	8.25276	8.31332	12.8925	13.2794	13.1349	12.038	12.532	12.6134	8.06392	8.25369	8.2951	7.96034	8.52767	8.58036	11.0196	10.5585	10.961	9.36393	9.19918	9.5479	9.89131	9.80075	9.2051	10.2578	9.46914	9.96496
Sum C33	PC		+HCOO-					FTMS- 520-960 mz	PC 28:0	% of total PC	%	0	6.56452	7.7745	7.44458	7.55721	7.84915	8.07645	7.83908	8.04918	8.20334	8.32413	8.17555	8.50889	6.51933	6.94652	7.19621	6.97697	6.56608	6.86589	7.76379	8.19693	8.35961	7.56586	7.68261	7.76818	6.5716	7.09178	6.66402	8.66566	8.3637	8.88776	6.89745	6.94024	7.43508	7.81293	7.88932	7.73617
Sum C34	PC		+HCOO-					FTMS- 520-960 mz	PC 28:0	% of total PC	%	0	31.7605	31.8366	31.8013	31.9891	31.7572	30.6944	31.2739	31.5711	30.1838	28.6528	28.1719	27.6079	33.3316	32.8653	31.9346	31.8588	30.6903	30.9456	27.7351	28.3503	28.5063	30.9731	31.3398	31.1052	30.9257	30.3106	31.018	27.7525	28.734	28.423	30.3432	29.2982	30.3111	30.096	29.3491	29.8395
Sum C35	PC		+HCOO-					FTMS- 520-960 mz	PC 28:0	% of total PC	%	0	6.85216	7.11476	6.98014	7.20402	6.59038	7.23712	6.65347	6.97339	7.13993	6.35698	6.58441	5.97424	6.36474	6.16709	6.1855	6.34423	6.36286	6.37739	6.30203	6.35327	6.4531	5.44694	5.41175	5.25903	5.81981	6.10622	5.85557	6.04789	6.06599	5.90528	6.56112	6.5721	6.79611	5.80908	5.66223	5.56488
Sum C36	PC		+HCOO-					FTMS- 520-960 mz	PC 28:0	% of total PC	%	100	27.773	26.7904	26.8826	25.733	25.7308	25.5981	25.555	25.1448	25.3605	28.8323	29.4476	29.6174	25.4381	25.0839	25.5157	26.2097	26.972	26.2099	29.3633	28.4123	28.1713	29.0722	28.4728	28.6062	26.6081	26.1059	26.5008	26.4979	26.7155	26.1418	28.419	28.9702	28.8498	25.5627	26.3106	25.8982
Sum C37	PC		+HCOO-					FTMS- 520-960 mz	PC 28:0	% of total PC	%	0	1.45431	2.44129	2.3099	1.9446	2.40114	2.88165	2.44149	2.75224	3.21911	4.45899	3.88832	4.69791	2.47988	3.103	3.30148	2.85933	2.69005	3.36432	3.46948	3.55247	3.60918	3.94104	3.27326	3.29244	2.92872	3.70825	3.42459	4.50756	3.68468	4.2853	3.32489	4.05309	3.60735	4.02232	4.89474	4.61483
Sum C38	PC		+HCOO-					FTMS- 520-960 mz	PC 28:0	% of total PC	%	0	8.90705	9.02881	8.62561	8.44731	8.36324	8.68099	8.33984	8.31533	8.36546	10.4817	10.3887	10.6545	7.0403	6.78031	6.68762	8.20338	8.29367	7.85965	11.522	11.3381	11.4686	10.4084	10.5867	10.4112	10.0794	10.0842	9.76767	11.1882	11.5292	11.2969	9.16242	9.27171	8.8583	10.6741	10.8196	11.0659
Sum C39	PC		+HCOO-					FTMS- 520-960 mz	PC 28:0	% of total PC	%	0	0.358938	0.279019	0.363345	0.279851	0.386057	0.566659	0.516596	0.282658	0.591034	0.650881	0.553497	0.746048	0.489151	0.465807	0.633026	0.566089	0.519811	0.628712	0.70033	0.551365	0.767112	0.60129	0.632122	0.69037	0.586228	0.632463	0.536407	0.953003	0.628723	0.70186	0.541207	0.721327	0.654101	0.749592	0.887	0.854583
Sum C40	PC		+HCOO-					FTMS- 520-960 mz	PC 28:0	% of total PC	%	0	2.19006	2.12042	2.04251	2.14545	2.1731	2.08039	1.73395	1.65379	1.89705	2.23353	2.8955	2.64171	1.57192	1.56618	1.53933	1.99876	2.03824	1.97297	3.53246	3.4567	3.11365	2.88243	2.89261	2.88891	2.72716	2.58134	2.61338	3.46018	3.49176	3.12716	2.28627	2.0993	2.36209	3.3458	3.23252	3.21552
Sum DB0	PC		+HCOO-					FTMS- 520-960 mz	PC 28:0	% of total PC	%	0	6.31746	5.90881	5.92995	6.59722	6.571	6.32157	6.7247	6.50124	6.56927	4.44509	4.68409	4.34615	6.67027	6.6166	6.6712	7.1774	7.44812	7.11063	5.01887	4.87658	4.55699	3.34033	3.22013	3.10255	7.10734	6.70756	7.10024	5.51311	5.6119	5.69436	3.87856	3.71136	3.92917	5.68714	4.99957	5.6525
Sum DB1	PC		+HCOO-					FTMS- 520-960 mz	PC 28:0	% of total PC	%	0	45.6856	45.6955	45.9514	45.2568	45.4641	45.0126	45.2951	45.2961	44.5533	47.5631	46.3738	46.835	48.7461	48.7584	48.0245	46.8451	47.0641	47.4677	45.9439	46.1434	46.356	47.3044	46.7573	46.8772	45.9949	45.9451	45.9208	45.5468	45.9946	46.2685	47.4673	47.1953	46.8555	44.1421	43.8611	44.4648
Sum DB2	PC		+HCOO-					FTMS- 520-960 mz	PC 28:0	% of total PC	%	0	28.7556	28.9839	29.4927	29.3567	29.3504	29.4076	29.8896	30.0742	29.6938	28.5743	28.1292	28.5578	28.1152	28.5113	29.0315	28.1166	27.5539	28.0795	26.0794	26.5524	26.9194	28.3965	28.7606	29.1392	26.4974	26.7134	27.115	25.5669	24.947	25.4349	28.24	28.3717	28.2675	26.4584	27.4244	26.1236
Sum DB3	PC		+HCOO-					FTMS- 520-960 mz	PC 28:0	% of total PC	%	0	5.45145	5.48257	5.4149	5.42135	5.23065	5.84073	5.45736	5.69425	6.14917	5.54804	5.984	5.59205	6.95855	6.66374	7.06589	6.78946	6.68394	6.62753	5.53647	5.14995	5.1191	8.38401	8.2623	8.04245	7.53837	7.71026	7.48578	5.35869	5.00819	4.75147	9.41883	9.87692	9.34967	7.78138	8.65438	7.88338
Sum DB4	PC		+HCOO-					FTMS- 520-960 mz	PC 28:0	% of total PC	%	100	6.78698	6.93199	6.61337	6.7169	6.57813	6.66076	6.72202	6.71903	6.73734	8.33982	8.33825	8.64328	5.58804	5.60495	5.61356	6.65895	6.75453	6.43265	9.5678	9.68378	9.98741	7.63309	8.00075	7.88801	7.99282	7.97559	7.73393	10.4107	10.6395	10.3812	7.08513	7.08357	7.46834	9.12101	8.8556	9.49133
Sum DB5	PC		+HCOO-					FTMS- 520-960 mz	PC 28:0	% of total PC	%	0	4.5453	4.46503	4.26145	4.1704	4.25171	4.2836	3.82084	3.71175	4.14515	3.73531	4.267	3.82088	2.69467	2.62664	2.33907	2.95397	3.00791	2.89082	5.03331	4.84874	4.3485	3.04484	3.08878	3.10391	3.24528	3.40417	3.14435	4.97184	5.12147	4.7906	2.6696	2.59059	2.6579	4.43228	3.90101	3.85487
Sum DB6	PC		+HCOO-					FTMS- 520-960 mz	PC 28:0	% of total PC	%	0	1.90981	2.0531	1.8335	1.91344	2.00298	1.93716	1.68591	1.63891	1.66587	1.79431	1.80005	1.82566	0.941076	0.931076	0.93644	1.15451	1.21433	1.06426	2.28907	2.2307	2.1997	1.49015	1.52347	1.44153	1.30125	1.25656	1.16831	2.17903	2.1725	2.21224	0.981347	0.940665	1.20616	1.95821	1.85116	2.12585
Sum DB7	PC		+HCOO-					FTMS- 520-960 mz	PC 28:0	% of total PC	%	0	0.547742	0.479129	0.502722	0.567182	0.551033	0.535973	0.404482	0.364558	0.486028	0	0.423589	0.379212	0.286038	0.287344	0.317905	0.303952	0.273178	0.326955	0.531152	0.514481	0.512925	0.406687	0.386705	0.405188	0.32264	0.287372	0.331598	0.452935	0.504857	0.466727	0.259183	0.229819	0.265671	0.41944	0.452751	0.403651
Sum Total	PC		+HCOO-					FTMS- 520-960 mz	PC 28:0	% of total PC	%	100	100	100	100	100	100	100	100	100	100	100	100	100	100	100	100	100	100	100	100	100	100	100	100	100	100	100	100	100	100	100	100	100	100	100	100	100
PC O-30:0	PC O	C39H79NO9P	+HCOO-	736.55	30	0	0	FTMS- 520-960 mz	PC O-28:0	Concentration	nmol/mg protein	0	0	0	0	0	0	0	0	0	0	0	0	0	0	0	0	0	0	0	0	0	0	0	0	0	0	0	0	0	0	0	0	0	0	0	0	0
PC O-30:1	PC O	C39H77NO9P	+HCOO-	734.534	30	1	0	FTMS- 520-960 mz	PC O-28:0	Concentration	nmol/mg protein	0	0.313454	0.278215	0.300015	0.236259	0.217172	0.187608	0.188063	0.165963	0.274103	0	0.186177	0	0.16478	0.198997	0	0.180136	0.198471	0.171876	0	0	0	0.636835	0.602988	0.583606	0.194268	0.323621	0.201786	0	0.209375	0	0.241179	0.208438	0.246424	0.271033	0.216993	0.235384
PC O-30:2	PC O	C39H75NO9P	+HCOO-	732.518	30	2	0	FTMS- 520-960 mz	PC O-28:0	Concentration	nmol/mg protein	0	0	0	0	0	0	0	0	0	0	0	0	0	0	0	0	0	0	0	0	0	0	0	0	0	0	0	0	0	0	0	0	0	0	0	0	0
PC O-31:1	PC O	C40H79NO9P	+HCOO-	748.55	31	1	0	FTMS- 520-960 mz	PC O-28:0	Concentration	nmol/mg protein	0	0	0	0	0	0	0	0	0	0	0	0	0	0	0	0	0	0	0	0	0	0	0	0	0	0	0	0	0	0	0	0	0	0	0	0	0
PC O-32:0	PC O	C41H83NO9P	+HCOO-	764.581	32	0	0	FTMS- 520-960 mz	PC O-28:0	Concentration	nmol/mg protein	0	0	0	0.159825	0.151507	0.154295	0	0	0.157563	0.260504	0	0	0	0.307076	0.352923	0.246192	0	0	0.164344	0	0	0	0	0	0	0	0	0	0	0	0	0	0	0	0	0	0
PC O-32:1	PC O	C41H81NO9P	+HCOO-	762.565	32	1	0	FTMS- 520-960 mz	PC O-28:0	Concentration	nmol/mg protein	0	0.226564	0.160234	0.203991	0.15002	0.162286	0.159713	0.170858	0.149597	0.288084	0	0.147229	0	0.50522	0.627078	0.437346	0.198265	0.253907	0.263764	0	0	0	0.523782	0.445382	0.435119	0	0.190987	0	0	0	0	0.224784	0.198712	0.206031	0.157589	0	0
PC O-32:2	PC O	C41H79NO9P	+HCOO-	760.55	32	2	0	FTMS- 520-960 mz	PC O-28:0	Concentration	nmol/mg protein	0	0	0	0	0	0	0	0	0	0	0	0	0	0	0	0	0	0	0	0	0	0	0	0	0	0	0	0	0	0	0	0	0	0	0	0	0
PC O-32:4	PC O	C41H75NO9P	+HCOO-	756.518	32	4	0	FTMS- 520-960 mz	PC O-28:0	Concentration	nmol/mg protein	0	0	0.167041	0.171854	0.165522	0.167365	0	0	0	0	0	0	0	0	0	0	0	0	0	0	0	0	0	0	0	0	0	0	0	0	0	0	0	0	0	0	0
PC O-33:0	PC O	C42H85NO9P	+HCOO-	778.597	33	0	0	FTMS- 520-960 mz	PC O-28:0	Concentration	nmol/mg protein	0	0	0	0	0	0	0	0	0	0	0	0	0	0	0	0	0	0	0	0	0	0	0	0	0	0	0	0	0	0	0	0	0	0	0	0	0
PC O-33:1	PC O	C42H83NO9P	+HCOO-	776.581	33	1	0	FTMS- 520-960 mz	PC O-28:0	Concentration	nmol/mg protein	0	0	0	0	0	0	0	0	0	0	0	0	0	0	0	0	0	0	0	0	0	0	0	0	0	0	0	0	0	0	0	0	0	0	0	0	0
PC O-34:0	PC O	C43H87NO9P	+HCOO-	792.612	34	0	0	FTMS- 520-960 mz	PC O-28:0	Concentration	nmol/mg protein	0	0	0	0	0	0	0	0	0	0	0	0	0	0	0	0	0	0	0	0	0	0	0	0	0	0	0	0	0	0	0	0	0	0	0	0	0
PC O-34:1	PC O	C43H85NO9P	+HCOO-	790.597	34	1	0	FTMS- 520-960 mz	PC O-28:0	Concentration	nmol/mg protein	0	0.631632	0.482927	0.529589	0.50734	0.449091	0.414143	0.451406	0.421389	0.743972	0.218638	0.455563	0.276712	0.950297	1.2638	0.894796	0.433245	0.486924	0.546681	0.396764	0.274881	0.199396	0.999754	0.899054	0.82311	0.239202	0.402401	0.23353	0.266645	0.371495	0.217821	0.40348	0.41666	0.37358	0.313093	0.232511	0.220746
PC O-34:2	PC O	C43H83NO9P	+HCOO-	788.581	34	2	0	FTMS- 520-960 mz	PC O-28:0	Concentration	nmol/mg protein	0	0	0	0.172474	0.15608	0	0	0	0	0.235506	0	0.238964	0	0.35587	0.462063	0.301678	0.188982	0.209445	0.203224	0.255845	0.184275	0	0.709371	0.597413	0.528423	0	0.20219	0	0	0.22573	0	0.335867	0.354494	0.39897	0.225544	0.182016	0.170224
PC O-34:3	PC O	C43H81NO9P	+HCOO-	786.565	34	3	0	FTMS- 520-960 mz	PC O-28:0	Concentration	nmol/mg protein	0	0	0	0	0	0	0	0	0	0	0	0	0	0	0	0	0	0	0	0	0	0	0	0	0	0	0	0	0	0	0	0	0	0	0	0	0
PC O-36:1	PC O	C45H89NO9P	+HCOO-	818.628	36	1	0	FTMS- 520-960 mz	PC O-28:0	Concentration	nmol/mg protein	0	0	0	0	0	0	0	0	0	0	0	0	0	0.19753	0.188454	0	0	0	0	0	0	0	0.332739	0.28853	0.290768	0	0	0	0	0	0	0.137549	0	0.156102	0.164602	0	0
PC O-36:2	PC O	C45H87NO9P	+HCOO-	816.612	36	2	0	FTMS- 520-960 mz	PC O-28:0	Concentration	nmol/mg protein	0	0	0	0	0	0	0	0	0	0	0	0	0	0.284483	0.371764	0.244103	0	0	0.135941	0	0	0	0.44782	0.39019	0.342398	0	0	0	0	0	0	0.240471	0.197565	0.21247	0	0	0
PC O-36:3	PC O	C45H85NO9P	+HCOO-	814.597	36	3	0	FTMS- 520-960 mz	PC O-28:0	Concentration	nmol/mg protein	0	0	0	0	0	0	0	0	0	0	0	0	0	0.263906	0.344128	0.20784	0	0	0	0	0	0	0.490749	0.414144	0.38229	0	0	0	0	0	0	0.240772	0.226483	0.243962	0	0	0
PC O-36:4	PC O	C45H83NO9P	+HCOO-	812.581	36	4	0	FTMS- 520-960 mz	PC O-28:0	Concentration	nmol/mg protein	0	0	0	0	0	0	0	0	0	0.198798	0	0	0	0.217551	0.281699	0	0	0	0	0	0	0	0.578213	0.486514	0.481552	0	0	0	0	0	0	0.205294	0.23572	0.242399	0	0	0
PC O-36:5	PC O	C45H81NO9P	+HCOO-	810.565	36	5	0	FTMS- 520-960 mz	PC O-28:0	Concentration	nmol/mg protein	0	0.269842	0.238206	0.263733	0.224248	0.213563	0.209212	0.185488	0.171911	0.258131	0.219792	0.390905	0.285222	0.289047	0.280551	0.236961	0.197207	0.223365	0.206343	0.520076	0.367019	0.28439	0.640762	0.575132	0.519012	0.226139	0.384478	0.251587	0.298807	0.444949	0.291149	0.31103	0.326514	0.242615	0.321187	0.259912	0.251598
PC O-38:1	PC O	C47H93NO9P	+HCOO-	846.659	38	1	0	FTMS- 520-960 mz	PC O-28:0	Concentration	nmol/mg protein	0	0.360076	0.346625	0.358731	0.258526	0.256736	0.240024	0.270874	0.279404	0.427493	0.163777	0.307391	0.159064	0.236943	0.250303	0.181239	0.203627	0.23029	0.213191	0.205174	0.142416	0	0.382345	0.345792	0.303848	0.205356	0.327204	0.225104	0.173436	0.266624	0	0.308827	0.28481	0.276324	0.367672	0.253442	0.259477
PC O-38:2	PC O	C47H91NO9P	+HCOO-	844.644	38	2	0	FTMS- 520-960 mz	PC O-28:0	Concentration	nmol/mg protein	0	0.219045	0.208932	0.240764	0.158772	0.146338	0	0.187115	0.187919	0.28443	0.148168	0.272224	0.171436	0.235065	0.295615	0.194852	0.23691	0.282788	0.253383	0.275262	0.200386	0.16523	0.584857	0.5043	0.528188	0.358245	0.540928	0.355331	0.254107	0.349698	0.227466	0.278595	0.253297	0.260079	0.325921	0.274662	0.275452
PC O-38:4	PC O	C47H87NO9P	+HCOO-	840.612	38	4	0	FTMS- 520-960 mz	PC O-28:0	Concentration	nmol/mg protein	0	0.200687	0.198038	0.219602	0.169748	0.18354	0.18169	0.177001	0.187187	0.240874	0.160959	0.222168	0.221734	0.323326	0.393369	0.302367	0.224891	0.229181	0.200498	0.183962	0.144069	0	0.633836	0.533842	0.511414	0.185748	0.196856	0.190087	0.188205	0	0	0.340294	0.321441	0.341555	0.246554	0.219518	0.226409
PC O-38:5	PC O	C47H85NO9P	+HCOO-	838.597	38	5	0	FTMS- 520-960 mz	PC O-28:0	Concentration	nmol/mg protein	0	0	0	0	0	0	0	0	0	0	0	0.153474	0	0	0.160208	0	0	0	0	0	0	0	0.39922	0.341414	0.35559	0	0	0	0	0	0	0	0	0	0	0	0
PC O-38:6	PC O	C47H83NO9P	+HCOO-	836.581	38	6	0	FTMS- 520-960 mz	PC O-28:0	Concentration	nmol/mg protein	0	0	0	0	0	0	0	0	0	0	0	0.179394	0	0.154023	0.162466	0	0	0	0	0.264425	0.179094	0	0.472058	0.446467	0.387691	0	0	0	0	0.199873	0	0	0	0.149087	0.229661	0.194123	0.168811
PC O-40:5	PC O	C49H89NO9P	+HCOO-	866.628	40	5	0	FTMS- 520-960 mz	PC O-28:0	Concentration	nmol/mg protein	0	0	0	0	0	0	0	0	0	0	0	0	0	0	0	0	0	0	0	0	0	0	0	0	0	0	0	0	0	0	0	0	0	0	0	0	0
PC O-40:6	PC O	C49H87NO9P	+HCOO-	864.612	40	6	0	FTMS- 520-960 mz	PC O-28:0	Concentration	nmol/mg protein	0	0	0	0	0	0	0	0	0	0	0	0	0	0	0	0	0	0	0	0	0	0	0	0	0	0	0	0	0	0	0	0	0	0	0	0	0
Sum C30	PC O		+HCOO-					FTMS- 520-960 mz	PC O-28:0	Concentration	nmol/mg protein		0.313454	0.278215	0.300015	0.236259	0.217172	0.187608	0.188063	0.165963	0.274103		0.186177		0.16478	0.198997		0.180136	0.198471	0.171876				0.636835	0.602988	0.583606	0.194268	0.323621	0.201786		0.209375		0.241179	0.208438	0.246424	0.271033	0.216993	0.235384
Sum C31	PC O		+HCOO-					FTMS- 520-960 mz	PC O-28:0	Concentration	nmol/mg protein
Sum C32	PC O		+HCOO-					FTMS- 520-960 mz	PC O-28:0	Concentration	nmol/mg protein		0.226564	0.327274	0.53567	0.467048	0.483946	0.159713	0.170858	0.30716	0.548588		0.147229		0.812296	0.980002	0.683538	0.198265	0.253907	0.428108				0.523782	0.445382	0.435119		0.190987					0.224784	0.198712	0.206031	0.157589
Sum C33	PC O		+HCOO-					FTMS- 520-960 mz	PC O-28:0	Concentration	nmol/mg protein
Sum C34	PC O		+HCOO-					FTMS- 520-960 mz	PC O-28:0	Concentration	nmol/mg protein		0.631632	0.482927	0.702063	0.66342	0.449091	0.414143	0.451406	0.421389	0.979478	0.218638	0.694527	0.276712	1.30617	1.72586	1.19647	0.622227	0.696369	0.749905	0.652609	0.459156	0.199396	1.70913	1.49647	1.35153	0.239202	0.604591	0.23353	0.266645	0.597225	0.217821	0.739347	0.771154	0.772549	0.538637	0.414527	0.390969
Sum C36	PC O		+HCOO-					FTMS- 520-960 mz	PC O-28:0	Concentration	nmol/mg protein		0.269842	0.238206	0.263733	0.224248	0.213563	0.209212	0.185488	0.171911	0.456929	0.219792	0.390905	0.285222	1.25252	1.4666	0.688904	0.197207	0.223365	0.342285	0.520076	0.367019	0.28439	2.49028	2.15451	2.01602	0.226139	0.384478	0.251587	0.298807	0.444949	0.291149	1.13512	0.986282	1.09755	0.485789	0.259912	0.251598
Sum C38	PC O		+HCOO-					FTMS- 520-960 mz	PC O-28:0	Concentration	nmol/mg protein		0.779808	0.753595	0.819096	0.587046	0.586613	0.421715	0.63499	0.654511	0.952797	0.472903	1.13465	0.552233	0.949357	1.26196	0.678459	0.665428	0.74226	0.667071	0.928823	0.665965	0.16523	2.47232	2.17181	2.08673	0.749349	1.06499	0.770523	0.615748	0.816195	0.227466	0.927716	0.859547	1.02705	1.16981	0.941745	0.93015
Sum C40	PC O		+HCOO-					FTMS- 520-960 mz	PC O-28:0	Concentration	nmol/mg protein
Sum DB0	PC O		+HCOO-					FTMS- 520-960 mz	PC O-28:0	Concentration	nmol/mg protein				0.159825	0.151507	0.154295			0.157563	0.260504				0.307076	0.352923	0.246192			0.164344
Sum DB1	PC O		+HCOO-					FTMS- 520-960 mz	PC O-28:0	Concentration	nmol/mg protein		1.53173	1.268	1.39233	1.15214	1.08528	1.00149	1.0812	1.01635	1.73365	0.382414	1.09636	0.435776	2.05477	2.52863	1.51338	1.01527	1.16959	1.19551	0.601938	0.417297	0.199396	2.87545	2.58175	2.43645	0.638826	1.24421	0.66042	0.44008	0.847493	0.217821	1.31582	1.10862	1.25846	1.27399	0.702946	0.715607
Sum DB2	PC O		+HCOO-					FTMS- 520-960 mz	PC O-28:0	Concentration	nmol/mg protein		0.219045	0.208932	0.413238	0.314851	0.146338		0.187115	0.187919	0.519936	0.148168	0.511188	0.171436	0.875419	1.12944	0.740633	0.425892	0.492233	0.592548	0.531107	0.38466	0.16523	1.74205	1.4919	1.39901	0.358245	0.743118	0.355331	0.254107	0.575428	0.227466	0.854933	0.805355	0.871519	0.551465	0.456678	0.445676
Sum DB3	PC O		+HCOO-					FTMS- 520-960 mz	PC O-28:0	Concentration	nmol/mg protein														0.263906	0.344128	0.20784							0.490749	0.414144	0.38229							0.240772	0.226483	0.243962
Sum DB4	PC O		+HCOO-					FTMS- 520-960 mz	PC O-28:0	Concentration	nmol/mg protein		0.200687	0.365078	0.391456	0.33527	0.350905	0.18169	0.177001	0.187187	0.439671	0.160959	0.222168	0.221734	0.540878	0.675068	0.302367	0.224891	0.229181	0.200498	0.183962	0.144069		1.21205	1.02036	0.992967	0.185748	0.196856	0.190087	0.188205			0.545588	0.557161	0.583954	0.246554	0.219518	0.226409
Sum DB5	PC O		+HCOO-					FTMS- 520-960 mz	PC O-28:0	Concentration	nmol/mg protein		0.269842	0.238206	0.263733	0.224248	0.213563	0.209212	0.185488	0.171911	0.258131	0.219792	0.544379	0.285222	0.289047	0.440759	0.236961	0.197207	0.223365	0.206343	0.520076	0.367019	0.28439	1.03998	0.916546	0.874602	0.226139	0.384478	0.251587	0.298807	0.444949	0.291149	0.31103	0.326514	0.242615	0.321187	0.259912	0.251598
Sum DB6	PC O		+HCOO-					FTMS- 520-960 mz	PC O-28:0	Concentration	nmol/mg protein												0.179394		0.154023	0.162466					0.264425	0.179094		0.472058	0.446467	0.387691					0.199873				0.149087	0.229661	0.194123	0.168811
Sum Total	PC O		+HCOO-					FTMS- 520-960 mz	PC O-28:0	Concentration	nmol/mg protein		2.2213	2.08022	2.62058	2.17802	1.95038	1.39239	1.6308	1.72093	3.21189	0.911333	2.55349	1.11417	4.48512	5.63342	3.24737	1.86326	2.11437	2.35924	2.10151	1.49214	0.649016	7.83234	6.87116	6.47301	1.40896	2.56867	1.45743	1.1812	2.06774	0.736437	3.26814	3.02413	3.3496	2.62285	1.83318	1.8081
PC O-30:0	PC O	C39H79NO9P	+HCOO-	736.55	30	0	0	FTMS- 520-960 mz	PC O-28:0	% of total PC O	%		0	0	0	0	0	0	0	0	0	0	0	0	0	0	0	0	0	0	0	0	0	0	0	0	0	0	0	0	0	0	0	0	0	0	0	0
PC O-30:1	PC O	C39H77NO9P	+HCOO-	734.534	30	1	0	FTMS- 520-960 mz	PC O-28:0	% of total PC O	%		14.1113	13.3743	11.4484	10.8474	11.1348	13.4738	11.5319	9.64379	8.534	0	7.29108	0	3.67393	3.53244	0	9.66777	9.38675	7.28523	0	0	0	8.13083	8.77564	9.016	13.788	12.5988	13.8454	0	10.1258	0	7.3797	6.89249	7.35682	10.3335	11.837	13.0183
PC O-30:2	PC O	C39H75NO9P	+HCOO-	732.518	30	2	0	FTMS- 520-960 mz	PC O-28:0	% of total PC O	%		0	0	0	0	0	0	0	0	0	0	0	0	0	0	0	0	0	0	0	0	0	0	0	0	0	0	0	0	0	0	0	0	0	0	0	0
PC O-31:1	PC O	C40H79NO9P	+HCOO-	748.55	31	1	0	FTMS- 520-960 mz	PC O-28:0	% of total PC O	%		0	0	0	0	0	0	0	0	0	0	0	0	0	0	0	0	0	0	0	0	0	0	0	0	0	0	0	0	0	0	0	0	0	0	0	0
PC O-32:0	PC O	C41H83NO9P	+HCOO-	764.581	32	0	0	FTMS- 520-960 mz	PC O-28:0	% of total PC O	%		0	0	6.09884	6.95617	7.91101	0	0	9.15565	8.1106	0	0	0	6.84655	6.26482	7.58126	0	0	6.96594	0	0	0	0	0	0	0	0	0	0	0	0	0	0	0	0	0	0
PC O-32:1	PC O	C41H81NO9P	+HCOO-	762.565	32	1	0	FTMS- 520-960 mz	PC O-28:0	% of total PC O	%		10.1996	7.70275	7.78422	6.88789	8.3207	11.4704	10.4769	8.6928	8.96928	0	5.7658	0	11.2644	11.1314	13.4677	10.6408	12.0086	11.18	0	0	0	6.68743	6.48191	6.72206	0	7.43526	0	0	0	0	6.87805	6.57088	6.15093	6.00829	0	0
PC O-32:2	PC O	C41H79NO9P	+HCOO-	760.55	32	2	0	FTMS- 520-960 mz	PC O-28:0	% of total PC O	%		0	0	0	0	0	0	0	0	0	0	0	0	0	0	0	0	0	0	0	0	0	0	0	0	0	0	0	0	0	0	0	0	0	0	0	0
PC O-32:4	PC O	C41H75NO9P	+HCOO-	756.518	32	4	0	FTMS- 520-960 mz	PC O-28:0	% of total PC O	%		0	8.02995	6.55788	7.59965	8.58114	0	0	0	0	0	0	0	0	0	0	0	0	0	0	0	0	0	0	0	0	0	0	0	0	0	0	0	0	0	0	0
PC O-33:0	PC O	C42H85NO9P	+HCOO-	778.597	33	0	0	FTMS- 520-960 mz	PC O-28:0	% of total PC O	%		0	0	0	0	0	0	0	0	0	0	0	0	0	0	0	0	0	0	0	0	0	0	0	0	0	0	0	0	0	0	0	0	0	0	0	0
PC O-33:1	PC O	C42H83NO9P	+HCOO-	776.581	33	1	0	FTMS- 520-960 mz	PC O-28:0	% of total PC O	%		0	0	0	0	0	0	0	0	0	0	0	0	0	0	0	0	0	0	0	0	0	0	0	0	0	0	0	0	0	0	0	0	0	0	0	0
PC O-34:0	PC O	C43H87NO9P	+HCOO-	792.612	34	0	0	FTMS- 520-960 mz	PC O-28:0	% of total PC O	%		0	0	0	0	0	0	0	0	0	0	0	0	0	0	0	0	0	0	0	0	0	0	0	0	0	0	0	0	0	0	0	0	0	0	0	0
PC O-34:1	PC O	C43H85NO9P	+HCOO-	790.597	34	1	0	FTMS- 520-960 mz	PC O-28:0	% of total PC O	%		28.4352	23.2152	20.2089	23.2936	23.0258	29.7433	27.6799	24.4861	23.163	23.991	17.8408	24.8358	21.1878	22.4339	27.5544	23.2519	23.0293	23.1719	18.88	18.4219	30.7228	12.7644	13.0845	12.716	16.9772	15.6658	16.0235	22.5741	17.9662	29.5778	12.3459	13.7778	11.153	11.9371	12.6835	12.2087
PC O-34:2	PC O	C43H83NO9P	+HCOO-	788.581	34	2	0	FTMS- 520-960 mz	PC O-28:0	% of total PC O	%		0	0	6.58152	7.16613	0	0	0	0	7.3323	0	9.35832	0	7.93446	8.20218	9.2899	10.1425	9.90578	8.61394	12.1744	12.3497	0	9.05695	8.69449	8.16348	0	7.87141	0	0	10.9167	0	10.277	11.7222	11.911	8.5992	9.92899	9.41449
PC O-34:3	PC O	C43H81NO9P	+HCOO-	786.565	34	3	0	FTMS- 520-960 mz	PC O-28:0	% of total PC O	%		0	0	0	0	0	0	0	0	0	0	0	0	0	0	0	0	0	0	0	0	0	0	0	0	0	0	0	0	0	0	0	0	0	0	0	0
PC O-36:1	PC O	C45H89NO9P	+HCOO-	818.628	36	1	0	FTMS- 520-960 mz	PC O-28:0	% of total PC O	%		0	0	0	0	0	0	0	0	0	0	0	0	4.40412	3.34529	0	0	0	0	0	0	0	4.24827	4.19914	4.49201	0	0	0	0	0	0	4.20877	0	4.66031	6.27568	0	0
PC O-36:2	PC O	C45H87NO9P	+HCOO-	816.612	36	2	0	FTMS- 520-960 mz	PC O-28:0	% of total PC O	%		0	0	0	0	0	0	0	0	0	0	0	0	6.34283	6.59926	7.51694	0	0	5.76208	0	0	0	5.71757	5.67866	5.28963	0	0	0	0	0	0	7.35804	6.53295	6.34316	0	0	0
PC O-36:3	PC O	C45H85NO9P	+HCOO-	814.597	36	3	0	FTMS- 520-960 mz	PC O-28:0	% of total PC O	%		0	0	0	0	0	0	0	0	0	0	0	0	5.88403	6.10869	6.40026	0	0	0	0	0	0	6.26567	6.02727	5.90591	0	0	0	0	0	0	7.36725	7.48919	7.28333	0	0	0
PC O-36:4	PC O	C45H83NO9P	+HCOO-	812.581	36	4	0	FTMS- 520-960 mz	PC O-28:0	% of total PC O	%		0	0	0	0	0	0	0	0	6.18942	0	0	0	4.85051	5.0005	0	0	0	0	0	0	0	7.38238	7.08053	7.43939	0	0	0	0	0	0	6.28167	7.79464	7.23666	0	0	0
PC O-36:5	PC O	C45H81NO9P	+HCOO-	810.565	36	5	0	FTMS- 520-960 mz	PC O-28:0	% of total PC O	%		12.1479	11.451	10.0639	10.2959	10.9498	15.0254	11.374	9.98939	8.03672	24.1177	15.3086	25.5996	6.44457	4.98012	7.297	10.584	10.5641	8.74615	24.7477	24.5968	43.8186	8.18098	8.37022	8.01809	16.0501	14.968	17.2624	25.2969	21.5186	39.5348	9.51703	10.7969	7.2431	12.2457	14.1782	13.915
PC O-38:1	PC O	C47H93NO9P	+HCOO-	846.659	38	1	0	FTMS- 520-960 mz	PC O-28:0	% of total PC O	%		16.2101	16.6629	13.689	11.8698	13.1633	17.2383	16.6098	16.2356	13.3097	17.9711	12.0381	14.2765	5.28287	4.44318	5.5811	10.9285	10.8917	9.0364	9.76318	9.54445	0	4.88162	5.03251	4.69408	14.5751	12.7383	15.4453	14.683	12.8944	0	9.44961	9.41791	8.24946	14.018	13.8253	14.3508
PC O-38:2	PC O	C47H91NO9P	+HCOO-	844.644	38	2	0	FTMS- 520-960 mz	PC O-28:0	% of total PC O	%		9.8611	10.0437	9.18744	7.28972	7.50301	0	11.4738	10.9196	8.85553	16.2583	10.6609	15.3869	5.24101	5.24753	6.00031	12.7148	13.3745	10.74	13.0983	13.4294	25.4586	7.4672	7.33937	8.15986	25.4262	21.0587	24.3807	21.5127	16.9121	30.8874	8.52457	8.37584	7.76448	12.4262	14.9828	15.2343
PC O-38:4	PC O	C47H87NO9P	+HCOO-	840.612	38	4	0	FTMS- 520-960 mz	PC O-28:0	% of total PC O	%		9.03467	9.52004	8.3799	7.79369	9.41045	13.0488	10.8536	10.8771	7.49943	17.6619	8.70057	19.9013	7.20887	6.98278	9.31114	12.0697	10.8392	8.49838	8.75382	9.6552	0	8.09255	7.76931	7.90071	13.1833	7.66376	13.0427	15.9334	0	0	10.4125	10.6292	10.1969	9.40021	11.9747	12.5219
PC O-38:5	PC O	C47H85NO9P	+HCOO-	838.597	38	5	0	FTMS- 520-960 mz	PC O-28:0	% of total PC O	%		0	0	0	0	0	0	0	0	0	0	6.01036	0	0	2.84389	0	0	0	0	0	0	0	5.09707	4.9688	5.49342	0	0	0	0	0	0	0	0	0	0	0	0
PC O-38:6	PC O	C47H83NO9P	+HCOO-	836.581	38	6	0	FTMS- 520-960 mz	PC O-28:0	% of total PC O	%		0	0	0	0	0	0	0	0	0	0	7.02545	0	3.43408	2.88398	0	0	0	0	12.5826	12.0025	0	6.02704	6.49769	5.98934	0	0	0	0	9.66626	0	0	0	4.45091	8.75613	10.5894	9.33638
PC O-40:5	PC O	C49H89NO9P	+HCOO-	866.628	40	5	0	FTMS- 520-960 mz	PC O-28:0	% of total PC O	%		0	0	0	0	0	0	0	0	0	0	0	0	0	0	0	0	0	0	0	0	0	0	0	0	0	0	0	0	0	0	0	0	0	0	0	0
PC O-40:6	PC O	C49H87NO9P	+HCOO-	864.612	40	6	0	FTMS- 520-960 mz	PC O-28:0	% of total PC O	%		0	0	0	0	0	0	0	0	0	0	0	0	0	0	0	0	0	0	0	0	0	0	0	0	0	0	0	0	0	0	0	0	0	0	0	0
Sum C30	PC O		+HCOO-					FTMS- 520-960 mz	PC O-28:0	% of total PC O	%		14.1113	13.3743	11.4484	10.8474	11.1348	13.4738	11.5319	9.64379	8.534	0	7.29108	0	3.67393	3.53244	0	9.66777	9.38675	7.28523	0	0	0	8.13083	8.77564	9.016	13.788	12.5988	13.8454	0	10.1258	0	7.3797	6.89249	7.35682	10.3335	11.837	13.0183
Sum C31	PC O		+HCOO-					FTMS- 520-960 mz	PC O-28:0	% of total PC O	%		0	0	0	0	0	0	0	0	0	0	0	0	0	0	0	0	0	0	0	0	0	0	0	0	0	0	0	0	0	0	0	0	0	0	0	0
Sum C32	PC O		+HCOO-					FTMS- 520-960 mz	PC O-28:0	% of total PC O	%		10.1996	15.7327	20.4409	21.4437	24.8128	11.4704	10.4769	17.8485	17.0799	0	5.7658	0	18.1109	17.3962	21.0489	10.6408	12.0086	18.146	0	0	0	6.68743	6.48191	6.72206	0	7.43526	0	0	0	0	6.87805	6.57088	6.15093	6.00829	0	0
Sum C33	PC O		+HCOO-					FTMS- 520-960 mz	PC O-28:0	% of total PC O	%		0	0	0	0	0	0	0	0	0	0	0	0	0	0	0	0	0	0	0	0	0	0	0	0	0	0	0	0	0	0	0	0	0	0	0	0
Sum C34	PC O		+HCOO-					FTMS- 520-960 mz	PC O-28:0	% of total PC O	%		28.4352	23.2152	26.7904	30.4598	23.0258	29.7433	27.6799	24.4861	30.4953	23.991	27.1991	24.8358	29.1222	30.6361	36.8443	33.3945	32.935	31.7858	31.0543	30.7716	30.7228	21.8214	21.779	20.8795	16.9772	23.5372	16.0235	22.5741	28.8829	29.5778	22.6228	25.5	23.0639	20.5363	22.6125	21.6232
Sum C36	PC O		+HCOO-					FTMS- 520-960 mz	PC O-28:0	% of total PC O	%		12.1479	11.451	10.0639	10.2959	10.9498	15.0254	11.374	9.98939	14.2261	24.1177	15.3086	25.5996	27.9261	26.0339	21.2142	10.584	10.5641	14.5082	24.7477	24.5968	43.8186	31.7949	31.3558	31.145	16.0501	14.968	17.2624	25.2969	21.5186	39.5348	34.7328	32.6137	32.7666	18.5214	14.1782	13.915
Sum C38	PC O		+HCOO-					FTMS- 520-960 mz	PC O-28:0	% of total PC O	%		35.1059	36.2267	31.2563	26.9532	30.0768	30.2871	38.9372	38.0323	29.6646	51.8913	44.4353	49.5646	21.1668	22.4014	20.8925	35.713	35.1054	28.2748	44.1979	44.6316	25.4586	31.5655	31.6077	32.2374	53.1846	41.4608	52.8688	52.129	39.4727	30.8874	28.3866	28.4229	30.6617	44.6006	51.3723	51.4435
Sum C40	PC O		+HCOO-					FTMS- 520-960 mz	PC O-28:0	% of total PC O	%		0	0	0	0	0	0	0	0	0	0	0	0	0	0	0	0	0	0	0	0	0	0	0	0	0	0	0	0	0	0	0	0	0	0	0	0
Sum DB0	PC O		+HCOO-					FTMS- 520-960 mz	PC O-28:0	% of total PC O	%		0	0	6.09884	6.95617	7.91101	0	0	9.15565	8.1106	0	0	0	6.84655	6.26482	7.58126	0	0	6.96594	0	0	0	0	0	0	0	0	0	0	0	0	0	0	0	0	0	0
Sum DB1	PC O		+HCOO-					FTMS- 520-960 mz	PC O-28:0	% of total PC O	%		68.9563	60.9553	53.1305	52.8987	55.6446	71.9258	66.2986	59.0583	53.976	41.9621	42.9358	39.1123	45.8131	44.8862	46.6032	54.489	55.3163	50.6735	28.6431	27.9664	30.7228	36.7126	37.5737	37.6402	45.3403	48.4381	45.3142	37.2571	40.9864	29.5778	40.262	36.6591	37.5705	48.5726	38.3458	39.5778
Sum DB2	PC O		+HCOO-					FTMS- 520-960 mz	PC O-28:0	% of total PC O	%		9.8611	10.0437	15.769	14.4559	7.50301	0	11.4738	10.9196	16.1878	16.2583	20.0192	15.3869	19.5183	20.049	22.8071	22.8573	23.2803	25.116	25.2727	25.7791	25.4586	22.2417	21.7125	21.613	25.4262	28.9301	24.3807	21.5127	27.8288	30.8874	26.1596	26.6309	26.0186	21.0254	24.9118	24.6488
Sum DB3	PC O		+HCOO-					FTMS- 520-960 mz	PC O-28:0	% of total PC O	%		0	0	0	0	0	0	0	0	0	0	0	0	5.88403	6.10869	6.40026	0	0	0	0	0	0	6.26567	6.02727	5.90591	0	0	0	0	0	0	7.36725	7.48919	7.28333	0	0	0
Sum DB4	PC O		+HCOO-					FTMS- 520-960 mz	PC O-28:0	% of total PC O	%		9.03467	17.55	14.9378	15.3933	17.9916	13.0488	10.8536	10.8771	13.6889	17.6619	8.70057	19.9013	12.0594	11.9833	9.31114	12.0697	10.8392	8.49838	8.75382	9.6552	0	15.4749	14.8498	15.3401	13.1833	7.66376	13.0427	15.9334	0	0	16.6941	18.4238	17.4336	9.40021	11.9747	12.5219
Sum DB5	PC O		+HCOO-					FTMS- 520-960 mz	PC O-28:0	% of total PC O	%		12.1479	11.451	10.0639	10.2959	10.9498	15.0254	11.374	9.98939	8.03672	24.1177	21.319	25.5996	6.44457	7.82401	7.297	10.584	10.5641	8.74615	24.7477	24.5968	43.8186	13.2781	13.339	13.5115	16.0501	14.968	17.2624	25.2969	21.5186	39.5348	9.51703	10.7969	7.2431	12.2457	14.1782	13.915
Sum DB6	PC O		+HCOO-					FTMS- 520-960 mz	PC O-28:0	% of total PC O	%		0	0	0	0	0	0	0	0	0	0	7.02545	0	3.43408	2.88398	0	0	0	0	12.5826	12.0025	0	6.02704	6.49769	5.98934	0	0	0	0	9.66626	0	0	0	4.45091	8.75613	10.5894	9.33638
Sum Total	PC O		+HCOO-					FTMS- 520-960 mz	PC O-28:0	% of total PC O	%		100	100	100	100	100	100	100	100	100	100	100	100	100	100	100	100	100	100	100	100	100	100	100	100	100	100	100	100	100	100	100	100	100	100	100	100
PE 30:0	PE	C35H69NO8P	-H+	662.477	30	0	0	FTMS- 520-960 mz	PE 28:0	Concentration	nmol/mg protein	0.00408523	0.00759558	0	0	0.000818509	0.00261123	0	0	0	0	0	0	0	0.0127589	0.00886994	0.0147527	0.0160191	0	0.0172724	0.00291527	0.00442673	0	0.00365693	0	0	0.00468483	0.00944777	0.0115213	0	0	0	0.00985851	0.0137974	0	0	0	0.0123227
PE 32:0	PE	C37H73NO8P	-H+	690.508	32	0	0	FTMS- 520-960 mz	PE 28:0	Concentration	nmol/mg protein	0	0	0	0	0.0737306	0	0	0	0	0	0	0	0	0.0822111	0.110345	0	0.0902868	0.09978	0.0891059	0.0808073	0.0747923	0	0	0.0727618	0	0.0830049	0.131153	0.10022	0	0.0854611	0	0.0911733	0.0968209	0.0709805	0.0833689	0.0639839	0.0684307
PE 32:1	PE	C37H71NO8P	-H+	688.492	32	1	0	FTMS- 520-960 mz	PE 28:0	Concentration	nmol/mg protein	0	0	0.0372503	0.000392425	0.021311	0	0.0346768	0	0.00421279	0	0.0198015	0	0.00501102	0.160297	0.241315	0.0695023	0.037237	0.0465353	0.0465878	0	0.0246741	0.0349858	0.0303856	0.0284582	0.0101764	0.0196851	0.0406972	0.00216409	0	0.0495938	0.0258548	0.0465861	0.0533187	0.00772092	0.00633003	0	0.0552639
PE 32:2	PE	C37H69NO8P	-H+	686.477	32	2	0	FTMS- 520-960 mz	PE 28:0	Concentration	nmol/mg protein	0	0	0	0	0	0	0	0	0	0	0	0	0	0	0	0	0	0	0	0	0	0	0	0	0	0	0	0	0	0	0	0	0	0	0	0	0
PE 33:1	PE	C38H73NO8P	-H+	702.508	33	1	0	FTMS- 520-960 mz	PE 28:0	Concentration	nmol/mg protein	0	0.0962368	0	0.0858626	0.0890219	0.080022	0	0.0789667	0.071099	0.103483	0	0	0	0.136873	0.155848	0.120463	0.0818287	0.0865712	0.0862473	0	0	0	0	0	0	0	0.0899814	0	0	0	0	0.121652	0.102299	0.075236	0	0	0
PE 34:0	PE	C39H77NO8P	-H+	718.539	34	0	0	FTMS- 520-960 mz	PE 28:0	Concentration	nmol/mg protein	0	0	0	0	0	0	0	0	0	0	0	0	0	0.0702938	0.103588	0	0	0	0.0660213	0	0	0	0	0	0	0	0	0	0	0	0	0	0	0	0	0	0
PE 34:1	PE	C39H75NO8P	-H+	716.524	34	1	0	FTMS- 520-960 mz	PE 28:0	Concentration	nmol/mg protein	0	1.34163	1.12373	1.24982	1.2464	1.11198	0.928298	1.00976	0.909251	1.32281	0.412144	0.803114	0.464328	2.72119	3.06122	2.13949	1.57352	1.82242	1.67808	0.862081	0.642961	0.518976	1.14713	0.982293	0.936293	1.23699	2.18837	1.4796	0.691418	1.0401	0.711915	2.0698	1.76429	1.4174	0.964041	0.687653	0.602018
PE 34:2	PE	C39H73NO8P	-H+	714.508	34	2	0	FTMS- 520-960 mz	PE 28:0	Concentration	nmol/mg protein	0	0.43962	0.314262	0.388124	0.381528	0.340451	0.294417	0.368529	0.306099	0.447903	0.0943677	0.178487	0.104614	0.837134	1.04972	0.691958	0.399305	0.499427	0.507735	0.162291	0.118222	0.100469	0.2378	0.217617	0.225471	0.237553	0.446488	0.31739	0.125978	0.201139	0.127125	0.713409	0.589906	0.428465	0.248454	0.178683	0.147313
PE 34:3	PE	C39H71NO8P	-H+	712.492	34	3	0	FTMS- 520-960 mz	PE 28:0	Concentration	nmol/mg protein	0	0	0	0	0	0	0	0	0	0	0	0	0	0	0	0	0	0	0	0	0	0	0	0	0	0	0	0	0	0	0	0	0	0	0	0	0
PE 35:1	PE	C40H77NO8P	-H+	730.539	35	1	0	FTMS- 520-960 mz	PE 28:0	Concentration	nmol/mg protein	0	0.422258	0.329401	0.369311	0.336274	0.333027	0.273059	0.280595	0.23908	0.379607	0.164487	0.31739	0.194762	0.421991	0.483822	0.376533	0.299838	0.35897	0.324481	0.316256	0.225956	0.189095	0.217494	0.1858	0.155269	0.235696	0.411761	0.291466	0.249536	0.333706	0.230782	0.398139	0.35967	0.291601	0.209449	0.151148	0.134503
PE 35:2	PE	C40H75NO8P	-H+	728.524	35	2	0	FTMS- 520-960 mz	PE 28:0	Concentration	nmol/mg protein	0	0.196839	0.172429	0.184815	0.185129	0.166315	0.139044	0.155733	0.146469	0.21206	0	0.102901	0	0.244265	0.264546	0.182509	0.132548	0.164708	0.151806	0.0986603	0.0729898	0	0	0	0	0.0863665	0.164586	0.111893	0	0.112434	0	0.194232	0.164576	0.133042	0.0864675	0	0
PE 36:1	PE	C41H79NO8P	-H+	744.555	36	1	0	FTMS- 520-960 mz	PE 28:0	Concentration	nmol/mg protein	0	3.26792	2.56623	2.95497	2.71065	2.54509	2.10264	2.20869	1.98794	2.96632	1.50072	2.89228	1.84387	4.10914	4.84714	3.56492	2.80247	3.43316	3.10071	3.09826	2.31568	1.87485	2.83085	2.42085	2.16214	2.91455	4.9604	3.31698	2.34104	3.27634	2.25002	4.39534	4.01196	3.20118	2.38916	1.85537	1.62073
PE 36:2	PE	C41H77NO8P	-H+	742.539	36	2	0	FTMS- 520-960 mz	PE 28:0	Concentration	nmol/mg protein	0	2.88632	2.24703	2.6336	2.48375	2.31668	1.84806	2.08333	1.85595	2.58031	0.957614	1.81615	1.07585	4.50758	5.39919	3.58559	2.83533	3.37808	3.08456	1.79753	1.47171	1.16849	1.8898	1.66745	1.54011	2.67899	4.64602	3.25034	1.31275	1.97707	1.36951	4.29277	3.58461	2.97838	1.94799	1.33636	1.11155
PE 36:3	PE	C41H75NO8P	-H+	740.524	36	3	0	FTMS- 520-960 mz	PE 28:0	Concentration	nmol/mg protein	0	0.269805	0.198257	0.239351	0.238222	0.205932	0.185054	0.202029	0.184983	0.269254	0	0.106329	0.0730506	0.484498	0.545263	0.389024	0.237983	0.28352	0.279653	0.0948099	0.0711063	0	0.148811	0.128871	0.120955	0.1512	0.331054	0.20316	0	0.103042	0	0.540594	0.419658	0.347209	0.162614	0.115281	0.0920593
PE 36:4	PE	C41H73NO8P	-H+	738.508	36	4	0	FTMS- 520-960 mz	PE 28:0	Concentration	nmol/mg protein	0	0.258524	0.235014	0.243165	0.238917	0.223269	0.188673	0.209776	0.182682	0.266654	0	0.114929	0	0.357685	0.413337	0.289633	0.197937	0.233171	0.219128	0.13073	0.0969044	0.0883318	0.0983128	0.0920443	0.0824556	0.137465	0.259532	0.168703	0.121303	0.153068	0.123635	0.318395	0.267994	0.257713	0.169098	0.121041	0.0987995
PE 36:5	PE	C41H71NO8P	-H+	736.492	36	5	0	FTMS- 520-960 mz	PE 28:0	Concentration	nmol/mg protein	0	0	0	0	0	0	0	0	0	0	0	0	0	0	0	0	0	0	0	0	0	0	0	0	0	0	0	0	0	0	0	0	0	0	0	0	0
PE 37:2	PE	C42H79NO8P	-H+	756.555	37	2	0	FTMS- 520-960 mz	PE 28:0	Concentration	nmol/mg protein	0	0.123348	0.0888137	0.109792	0.111628	0.104324	0.088798	0.110858	0.0841757	0.138392	0.0742944	0.121066	0.0810656	0.242524	0.309717	0.214405	0.160726	0.202795	0.180274	0.132386	0.0943031	0	0.130474	0.12114	0.1143	0.188154	0.312914	0.202803	0.0970105	0.130853	0.0988391	0.264305	0.230295	0.171161	0.107686	0.0786686	0
PE 37:3	PE	C42H77NO8P	-H+	754.539	37	3	0	FTMS- 520-960 mz	PE 28:0	Concentration	nmol/mg protein	0	0	0	0	0	0	0	0	0	0	0	0	0	0.144387	0.177972	0.128793	0.0846495	0.124809	0.10844	0	0	0	0.101505	0.0958393	0.089017	0.0935409	0.146685	0.107826	0	0.0831089	0	0.20289	0.176638	0.136058	0.0752642	0	0
PE 37:4	PE	C42H75NO8P	-H+	752.524	37	4	0	FTMS- 520-960 mz	PE 28:0	Concentration	nmol/mg protein	0	0	0	0	0	0.0783482	0	0	0	0	0	0	0	0	0	0	0	0	0	0	0	0	0	0	0	0	0	0	0	0	0	0.0730886	0	0	0	0	0
PE 38:1	PE	C43H83NO8P	-H+	772.586	38	1	0	FTMS- 520-960 mz	PE 28:0	Concentration	nmol/mg protein	0	0	0	0	0	0	0	0	0	0	0	0.0754401	0	0.099971	0.118198	0.0832686	0.0815746	0	0.105984	0.130563	0.0855995	0	0.119194	0.0906858	0.0916396	0.143333	0.234609	0.148082	0.0760473	0.125276	0.101975	0.154772	0.155079	0.113009	0.0840932	0.0678637	0
PE 38:2	PE	C43H81NO8P	-H+	770.571	38	2	0	FTMS- 520-960 mz	PE 28:0	Concentration	nmol/mg protein	0	0.199421	0.157821	0.193386	0.17556	0.139376	0.138735	0.144727	0.132443	0.186516	0.13602	0.26279	0.165255	0.540762	0.647675	0.461399	0.409125	0.459443	0.441296	0.295571	0.237154	0.173751	0.486832	0.376557	0.349531	0.553651	0.927914	0.632372	0.250625	0.340935	0.243505	0.753968	0.72008	0.477486	0.286029	0.223141	0.191746
PE 38:3	PE	C43H79NO8P	-H+	768.555	38	3	0	FTMS- 520-960 mz	PE 28:0	Concentration	nmol/mg protein	0	0.779457	0.631318	0.702045	0.689191	0.623854	0.514334	0.618199	0.566269	0.846328	0.395346	0.743214	0.490563	1.85299	2.14377	1.51057	1.16869	1.33317	1.25522	0.671676	0.55636	0.417014	1.26526	1.04372	0.943063	1.42198	2.48531	1.65163	0.491074	0.710976	0.487256	3.14121	2.77254	2.08472	1.14158	0.828704	0.732179
PE 38:4	PE	C43H77NO8P	-H+	766.539	38	4	0	FTMS- 520-960 mz	PE 28:0	Concentration	nmol/mg protein	0	2.88742	2.26055	2.66101	2.37262	2.364	1.82836	1.93263	1.66481	2.47834	0.824143	1.52656	0.919043	2.37046	2.81884	1.96995	1.66938	1.97204	1.84391	1.68385	1.3741	1.11187	1.08599	0.952036	0.904749	1.51868	2.53865	1.76383	1.32876	1.85468	1.41933	2.63523	2.14461	2.08587	2.21811	1.47864	1.31181
PE 38:5	PE	C43H75NO8P	-H+	764.524	38	5	0	FTMS- 520-960 mz	PE 28:0	Concentration	nmol/mg protein	0	1.2189	0.994512	1.10534	1.06397	0.989612	0.831659	0.883527	0.749753	1.14664	0.312244	0.54101	0.359677	0.976228	1.10859	0.783831	0.723729	0.817418	0.775195	0.633408	0.500964	0.403348	0.370859	0.287423	0.258934	0.572447	0.985707	0.666159	0.498324	0.687287	0.505613	0.906956	0.777575	0.743343	0.751311	0.563699	0.513688
PE 38:6	PE	C43H73NO8P	-H+	762.508	38	6	0	FTMS- 520-960 mz	PE 28:0	Concentration	nmol/mg protein	0	0.757443	0.600326	0.683325	0.582233	0.585514	0.461658	0.451413	0.395139	0.610493	0.329913	0.629606	0.388621	0.509067	0.577994	0.447159	0.569149	0.683418	0.598175	0.849641	0.647385	0.503247	0.31214	0.266932	0.247497	0.631646	1.03388	0.698683	0.6684	0.929164	0.642259	0.513888	0.456341	0.399058	0.549697	0.380698	0.326951
PE 38:7	PE	C43H71NO8P	-H+	760.492	38	7	0	FTMS- 520-960 mz	PE 28:0	Concentration	nmol/mg protein	0.0254862	0.0451459	0.00998971	0.0515431	0.0335153	0.0381162	0.0326099	0.0445167	0	0.01199	0.0109294	0	0.00393131	0.00143848	0.0157803	0	0.00818042	0.0126964	0.0122445	0.0317777	0.0242799	0.0200207	0	0	0.00085152	0	0.00438187	0.00269089	0.0333014	0	0.00367237	0	0	0	0.00217397	0.0154674	0
PE 39:0	PE	C44H87NO8P	-H+	788.617	39	0	0	FTMS- 520-960 mz	PE 28:0	Concentration	nmol/mg protein	0	0.000612838	0.00981834	0.00390057	0.00528833	0.00908594	0	0.00790331	0.0117186	0.00348572	0.00704207	0.00964528	0.00805093	0.00837507	0.0118376	0.00557902	0	0.00563904	0.00588934	0	0.00994765	0.0150772	0.0107219	0	0.00970779	0.00644845	0.00618628	0.0137283	0.0128854	0.00158087	0.0135486	0.00169162	0	0.0096319	0.0106707	0	0
PE 39:3	PE	C44H81NO8P	-H+	782.571	39	3	0	FTMS- 520-960 mz	PE 28:0	Concentration	nmol/mg protein	0	0	0	0	0	0	0	0	0	0.0797321	0	0.116928	0.0736802	0.177238	0.226123	0.154533	0.137334	0.147276	0.136004	0.119187	0.0936902	0	0.166573	0.132561	0.120998	0.192916	0.328695	0.232172	0.118799	0.147529	0.109936	0.312481	0.277759	0.200031	0.154022	0.120038	0.102751
PE 39:4	PE	C44H79NO8P	-H+	780.555	39	4	0	FTMS- 520-960 mz	PE 28:0	Concentration	nmol/mg protein	0	0	0	0	0	0	0	0	0	0	0	0	0	0	0	0	0	0	0	0	0	0	0	0	0	0	0	0	0	0	0	0.0858096	0	0	0	0	0
PE 39:5	PE	C44H77NO8P	-H+	778.539	39	5	0	FTMS- 520-960 mz	PE 28:0	Concentration	nmol/mg protein	0	0	0	0	0	0	0	0	0	0	0	0	0	0	0	0	0	0	0	0	0	0	0	0	0	0	0	0	0	0	0	0	0	0	0	0	0
PE 39:6	PE	C44H75NO8P	-H+	776.524	39	6	0	FTMS- 520-960 mz	PE 28:0	Concentration	nmol/mg protein	0	0	0	0	0	0	0	0	0	0	0	0.0976797	0	0	0	0	0	0	0	0.146781	0.100058	0.0895641	0	0	0	0	0	0	0.108854	0.120543	0.0897275	0	0	0	0	0	0
PE 40:1	PE	C45H87NO8P	-H+	800.617	40	1	0	FTMS- 520-960 mz	PE 28:0	Concentration	nmol/mg protein	0	0	0	0	0	0	0	0	0	0	0	0	0	0	0	0	0	0	0	0	0	0	0	0	0	0	0	0	0	0	0	0	0	0	0	0	0
PE 40:2	PE	C45H85NO8P	-H+	798.602	40	2	0	FTMS- 520-960 mz	PE 28:0	Concentration	nmol/mg protein	0	0	0	0	0	0	0	0	0	0	0	0	0	0.0953912	0.126485	0	0	0.0812327	0.0787319	0	0	0	0.0977246	0.0716964	0.0756356	0.0981268	0.176347	0.128806	0	0	0	0.160331	0.144463	0.0839395	0	0	0
PE 40:3	PE	C45H83NO8P	-H+	796.586	40	3	0	FTMS- 520-960 mz	PE 28:0	Concentration	nmol/mg protein	0	0	0	0	0	0	0	0	0	0	0.0955988	0.18275	0.0986076	0.317326	0.345121	0.266046	0.247245	0.287685	0.283504	0.226996	0.173146	0.143216	0.405417	0.344882	0.277228	0.676411	1.06987	0.731714	0.244122	0.280428	0.204219	1.07677	0.897724	0.625823	0.507979	0.383038	0.316315
PE 40:4	PE	C45H81NO8P	-H+	794.571	40	4	0	FTMS- 520-960 mz	PE 28:0	Concentration	nmol/mg protein	0	0.15139	0.141051	0.157064	0.146925	0.163931	0.116867	0.144715	0.115701	0.176583	0.157832	0.282916	0.176439	0.324199	0.386357	0.231806	0.280948	0.322364	0.291087	0.462157	0.346287	0.267874	0.314117	0.286978	0.251866	0.615133	0.977561	0.683687	0.463161	0.66163	0.450602	0.640779	0.513057	0.411102	0.417547	0.305205	0.251432
PE 40:5	PE	C45H79NO8P	-H+	792.555	40	5	0	FTMS- 520-960 mz	PE 28:0	Concentration	nmol/mg protein	0	0.555134	0.457214	0.517653	0.475355	0.480344	0.346652	0.349861	0.308978	0.491084	0.283735	0.531488	0.330538	0.497657	0.557178	0.382874	0.399761	0.498317	0.418726	0.605748	0.490367	0.401804	0.368081	0.318762	0.288711	0.61572	0.964301	0.672981	0.543066	0.737928	0.553554	0.57686	0.506933	0.456402	0.453763	0.31086	0.259878
PE 40:6	PE	C45H77NO8P	-H+	790.539	40	6	0	FTMS- 520-960 mz	PE 28:0	Concentration	nmol/mg protein	0	1.32435	1.05442	1.1838	1.03735	1.10448	0.844172	0.7941	0.676296	1.04502	0.69193	1.28348	0.806584	0.879265	0.990705	0.738549	0.839533	1.02127	0.841815	1.73521	1.31611	1.07112	0.713767	0.584863	0.49515	1.152	1.79641	1.20759	1.31217	1.79339	1.25713	0.874369	0.758858	0.648146	0.917683	0.680325	0.547214
PE 40:7	PE	C45H75NO8P	-H+	788.524	40	7	0	FTMS- 520-960 mz	PE 28:0	Concentration	nmol/mg protein	0	0.84646	0.669374	0.752392	0.717778	0.672944	0.55962	0.507713	0.482112	0.721	0.519468	0.987392	0.613976	0.548593	0.600946	0.451241	0.629165	0.686254	0.574626	1.34208	1.08426	0.849512	0.498499	0.412209	0.366299	0.916253	1.4068	0.952716	0.971278	1.42683	0.935309	0.50488	0.460325	0.385286	0.749484	0.577736	0.438092
Sum C30	PE		-H+					FTMS- 520-960 mz	PE 28:0	Concentration	nmol/mg protein	0.00408523	0.00759558			0.000818509	0.00261123								0.0127589	0.00886994	0.0147527	0.0160191		0.0172724	0.00291527	0.00442673		0.00365693			0.00468483	0.00944777	0.0115213				0.00985851	0.0137974				0.0123227
Sum C32	PE		-H+					FTMS- 520-960 mz	PE 28:0	Concentration	nmol/mg protein			0.0372503	0.000392425	0.0950416		0.0346768		0.00421279		0.0198015		0.00501102	0.242508	0.35166	0.0695023	0.127524	0.146315	0.135694	0.0808073	0.0994664	0.0349858	0.0303856	0.10122	0.0101764	0.10269	0.17185	0.102384		0.135055	0.0258548	0.137759	0.15014	0.0787014	0.089699	0.0639839	0.123695
Sum C33	PE		-H+					FTMS- 520-960 mz	PE 28:0	Concentration	nmol/mg protein		0.0962368		0.0858626	0.0890219	0.080022		0.0789667	0.071099	0.103483				0.136873	0.155848	0.120463	0.0818287	0.0865712	0.0862473								0.0899814					0.121652	0.102299	0.075236
Sum C34	PE		-H+					FTMS- 520-960 mz	PE 28:0	Concentration	nmol/mg protein		1.78125	1.43799	1.63795	1.62793	1.45243	1.22271	1.37829	1.21535	1.77071	0.506512	0.9816	0.568942	3.62862	4.21453	2.83145	1.97283	2.32185	2.25184	1.02437	0.761183	0.619445	1.38493	1.19991	1.16176	1.47454	2.63485	1.79699	0.817396	1.24124	0.83904	2.78321	2.35419	1.84586	1.2125	0.866336	0.749331
Sum C35	PE		-H+					FTMS- 520-960 mz	PE 28:0	Concentration	nmol/mg protein		0.619097	0.50183	0.554126	0.521404	0.499342	0.412103	0.436328	0.38555	0.591666	0.164487	0.420291	0.194762	0.666256	0.748368	0.559041	0.432386	0.523679	0.476288	0.414917	0.298946	0.189095	0.217494	0.1858	0.155269	0.322062	0.576347	0.403358	0.249536	0.44614	0.230782	0.592371	0.524245	0.424643	0.295917	0.151148	0.134503
Sum C36	PE		-H+					FTMS- 520-960 mz	PE 28:0	Concentration	nmol/mg protein		6.68256	5.24654	6.07109	5.67154	5.29097	4.32443	4.70382	4.21155	6.08254	2.45833	4.92969	2.99278	9.4589	11.2049	7.82917	6.07373	7.32793	6.68405	5.12133	3.95539	3.13167	4.96777	4.30921	3.90566	5.8822	10.197	6.93918	3.7751	5.50953	3.74316	9.5471	8.28422	6.78448	4.66887	3.42805	2.92314
[truncated: 863 more rows]

## Sheet: SampleTable
Sample Identifier	Material code	Sample Number	Sample Name	Sample Material	Sample amount	Unit amount	Sample concentration	Unit concentration	Treatment
[truncated: 36 more rows]

[truncated: 2 more sheets: Lipid Class Stats, Explanations]
